# Supplementary material
Source: PubMed Central journal article supplement (PMC5243942)
Supplement: NIHMS841068-supplement-Supporting_Info.pdf [file NIHMS841068-supplement-Supporting_Info.pdf]

## Supporting information

### **Sequential C-H Arylation and Enantioselective Hydrogenation Enables Ideal Asymmetric Entry to the Indenopiperidine Core of an 11 $\beta$ -HSD-1 Inhibitor**

Xudong Wei,<sup>\*,†</sup> Bo Qu,<sup>\*,†</sup> Xingzhong Zeng,<sup>†</sup> Jolaine Savoie,<sup>†</sup> Keith R. Fandrick,<sup>†</sup> Jean-Nicolas Desrosiers,<sup>†</sup> Sergei Tcyrulnikov,<sup>§</sup> Maurice A. Marsini,<sup>†</sup> Frederic G. Buono,<sup>†</sup> Zhibin Li,<sup>†</sup> Bing-Shiou Yang,<sup>†</sup> Wenjun Tang,<sup>†</sup> Nizar Haddad,<sup>†</sup> Osvaldo Gutierrez,<sup>§</sup> Jun Wang,<sup>†</sup> Heewon Lee,<sup>†</sup> Shengli Ma,<sup>†</sup> Scot Campbell,<sup>†</sup> Jon C. Lorenz,<sup>†</sup> Matthias Eckhardt,<sup>‡</sup> Frank Himmelsbach,<sup>‡</sup> Stefan Peters,<sup>‡</sup> Nitinchandra D. Patel,<sup>†</sup> Zhulin Tan,<sup>†</sup> Nathan K. Yee,<sup>†</sup> Jinhua J. Song,<sup>†</sup> Frank Roschangar,<sup>†</sup> Marisa C. Kozlowski<sup>§</sup> and Chris H. Senanayake<sup>†</sup>

<sup>†</sup> Chemical Development, Boehringer Ingelheim Pharmaceuticals, Inc., 900 Ridgebury Road, Ridgefield, CT 06877, USA

<sup>‡</sup> Medicinal Chemistry, Boehringer Ingelheim Pharma GmbH & Co. KG, Birkendorfer Str. 65, 88397 Biberach/Riss, Germany

<sup>§</sup> Department of Chemistry, University of Pennsylvania, Philadelphia, PA 19104, USA

## Table of Contents

|      |                                                                       |     |
|------|-----------------------------------------------------------------------|-----|
| 1.   | General Information.....                                              | S3  |
| 2.   | Experimental Procedures                                               |     |
| 2.1  | Synthesis of compound <b>3a</b> .....                                 | S4  |
| 2.2  | Synthesis of compound <b>3b</b> .....                                 | S4  |
| 2.3  | Synthesis of compound <b>6</b> .....                                  | S5  |
| 2.4  | Synthesis of compound <b>7a</b> .....                                 | S5  |
| 2.5  | Synthesis of compound <b>7b</b> .....                                 | S6  |
| 2.6  | Synthesis of compound <b>9</b> .....                                  | S7  |
| 2.7  | Synthesis of compound <b>11</b> .....                                 | S8  |
| 2.8  | Synthesis of compound <b>12</b> .....                                 | S9  |
| 2.9  | Synthesis of compound <b>10</b> .....                                 | S10 |
| 2.10 | Synthesis of compound <b>2-D-DBTA salt</b> .....                      | S11 |
| 2.11 | Synthesis of compound <b>13</b> .....                                 | S13 |
| 2.12 | Synthesis of compound <b>14</b> through asymmetric hydrogenation..... | S13 |
| 2.13 | Debenzylation of <b>14</b> .....                                      | S14 |
| 2.14 | Synthesis of compound <b>1</b> .....                                  | S16 |
| 2.15 | Synthesis of compound <b>1-HCl salt</b> .....                         | S17 |
| 2.16 | Synthesis of chiral ligands <b>L9, L10, L11, L12</b> .....            | S18 |
| 3    | NMR Spectra.....                                                      | S23 |
| 4    | Kinetics studies.....                                                 | S78 |
| 5    | DFT calculations.....                                                 | S82 |

## 1. General Information

All reactions, unless specified otherwise, were performed in oven-dried glassware under argon or nitrogen atmosphere. All reagents and solvents were purchased from commercial sources (Aldrich or Fisher) and used as received, unless otherwise indicated. Palladium catalysts and  $[\text{Ir}(\text{COD})\text{Cl}]_2$  were purchased from Aldrich or Strem and used as received. HPLC analyses were performed on an Agilent 1100 quaternary pump HPLC system. Chiral HPLC analyses (either reverse phase or normal phase) were conducted on Agilent 1100 quaternary pump HPLC systems. LC-MS analyses were performed on an Agilent LC/MSD SL system. UPLC-MS analyses were conducted on a Waters Acquity Ultra Performance LC system. Flash Chromatography was performed on EMD 230-400 mesh silica gel eluted with hexanes and ethyl acetate. Melting points were obtained on a Fisher-Johns Melting Point Apparatus and are uncorrected. NMR spectra ( $^1\text{H}$ ,  $^{13}\text{C}$ , DEPT 135, COSY, NOESY, HMQC, HMBC, etc) were recorded on Bruker spectrometers: 400 MHz or 500 MHz for  $^1\text{H}$ ; 100 MHz or 125 MHz for  $^{13}\text{C}$ . The NMR spectra were calibrated to the internal standard TMS or deuterated solvents:  $\text{CDCl}_3$  ( $^1\text{H}$  NMR  $\delta$  7.26 ppm and  $^{13}\text{C}$  NMR  $\delta$  77.0 ppm),  $\text{DMSO}-d_6$  ( $^1\text{H}$  NMR  $\delta$  2.50 ppm and  $^{13}\text{C}$  NMR  $\delta$  39.5 ppm),  $\text{MeOH}-d_4$  ( $^1\text{H}$  NMR  $\delta$  2.50 ppm and  $^{13}\text{C}$  NMR  $\delta$  39.5 ppm). Optical Rotations were performed on a Rudolph Research Autopol III polarimeter at 589 nm.

### Synthesis of 3-iodo-4-(pyridin-2-ylmethyl)benzonitrile (**3a**)

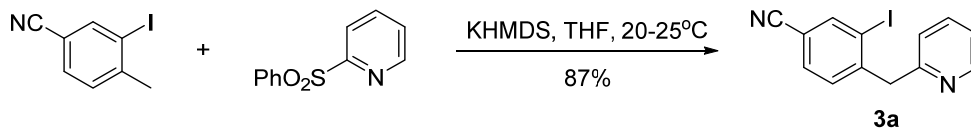

To a mixture of 2-(phenylsulfonyl)pyridine (43.85 g, 0.2 mol) and 3-iodo-4-methylbenzonitrile (51.04 g, 0.21 mol) in THF (100 mL) was added KHMDS (1.0 M solution in THF, 400 mL, 0.4 mol) slowly in 1 h at 20-25 °C. The reaction mixture was stirred at 25 °C for another 2-4 hours until HPLC showed the starting material 3-iodo-4-methylbenzonitrile disappeared. Water (150 mL) was added, followed by phase cut to remove aqueous layer. Organic layer was washed with 10% aqueous NaHCO<sub>3</sub> (60 mL), then concentrated. Crude solid residue was purified by crystallization from isopropanol-water. Desired product **3a** was obtained as beige solid (55.6 g, 87% yield). M.p. 72-74 °C. <sup>1</sup>H NMR (CDCl<sub>3</sub>, 500 MHz) δ 8.57 (d, *J* = 4.5 Hz, 1H), 8.128 (s, 1H), 7.63 (t, *J* = 7.5 Hz, 1H), 7.58 (d, *J* = 7.5 Hz, 1H), 7.32 (d, *J* = 8.0 Hz, 1H), 7.18 (dd, *J* = 5.5, 7.0 Hz, 1H), 7.14 (d, *J* = 8.0 Hz, 1H), 4.33 (s, 2H). <sup>13</sup>C NMR (CDCl<sub>3</sub>, 125 MHz) δ 157.9, 149.7, 148.0, 142.5, 136.7, 131.7, 130.8, 123.6, 121.8, 117.0, 112.0, 100.7, 49.1. HRMS-EI calcd for C<sub>13</sub>H<sub>10</sub>IN<sub>2</sub> [M+H]<sup>+</sup>: 320.9883, Found: 320.9868.

### Synthesis of 3-bromo-4-(pyridin-2-ylmethyl)benzonitrile (**3b**)

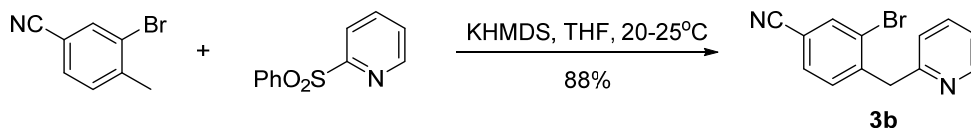

To a mixture of 2-(phenylsulfonyl)pyridine (32.89 g, 0.150 mol) and 3-bromo-4-methylbenzonitrile (30.88 g, 0.158 mol) in THF (75 mL) was added KHMDS (1.0 M solution in THF, 300 mL, 0.3 mol) slowly in 1 h at 20-25 °C. The reaction mixture was stirred at 25 °C for another 2-4 hours until HPLC showed that the starting material 3-bromo-4-methylbenzonitrile was consumed. Water (110 mL) was added, followed by phase cut to remove aqueous layer. Organic layer was washed with 10% aqueous NaHCO<sub>3</sub> (45 mL), then concentrated. Crude solid residue was purified by crystallization from isopropanol-water. Desired product **3b** was obtained as beige solid (36.1 g, 88% yield). M.p. 55-57 °C. <sup>1</sup>H NMR (CDCl<sub>3</sub>, 500 MHz) δ 8.55 (d, *J* = 4.5 Hz, 1H), 7.86 (d, *J* = 1.5 Hz, 1H), 7.63 (dt, *J* = 1.5, 7.5 Hz, 1H), 7.55 (dd, *J* = 1.5, 7.5 Hz, 1H), 7.37 (d, *J* = 8.0 Hz, 1H), 7.17 (dd, *J* = 5.0, 7.5 Hz, 1H), 7.16 (d, *J* = 8.0 Hz, 1H), 4.34 (s, 2H). <sup>13</sup>C NMR (CDCl<sub>3</sub>, 125 MHz) δ 157.8, 149.7, 144.7, 136.7, 135.9, 131.9, 130.9, 125.1, 123.4, 121.8, 117.3, 112.0, 44.4. HRMS-EI calcd for C<sub>13</sub>H<sub>9</sub>BrN<sub>2</sub> [M+H]<sup>+</sup>: 273.0022, Found: 273.0009.

## Synthesis of Pyrido[1,2-a]indole-3-carbonitrile (6)

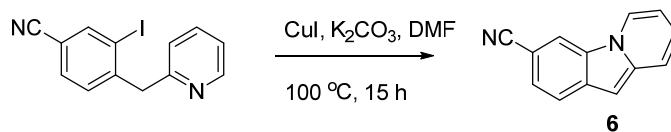

A 25 ml flask was charged with starting material 3-iodo-4-(pyridin-2-ylmethyl)benzonitrile (273 mg, 1 mmol), K<sub>2</sub>CO<sub>3</sub> (276 mg, 2 mmol) and DMF (2 mL). Reaction mixture was purged with argon, CuI (19.05 mg, 0.1 mmol) was then added. Reaction mixture was stirred at 100 °C and the reaction progress was monitored by LCMS. After 14 h, the reaction was quenched with water (5 mL) and extracted with MeTHF (15 mL). After removal of the organics, product was purified by chromatography through a short silica gel column to give product ca. 115 mg **6** was obtained as bright orange solid, 60% yield, m.p. 215-217 °C (decomp.). <sup>1</sup>H NMR (CDCl<sub>3</sub>, 500 M Hz) δ 8.98 (d, *J* = 7.5 Hz, 1H), 8.86 (s, 1H), 7.85 (d, *J* = 8.5 Hz, 1H), 7.62 (d, *J* = 9.5 Hz, 1H), 7.58 (d, *J* = 9.5 Hz, 1H), 7.16 (dd, *J* = 1.5, 9.0 Hz, 1H), 6.77-6.74 (m, 2H). <sup>13</sup>C NMR (CDCl<sub>3</sub>, 125 M Hz) δ 139.0, 130.9, 128.0, 126.1, 125.2, 124.6, 120.7, 120.7, 118.8, 117.0, 109.4, 99.4, 92.3. HRMS-EI calcd for C<sub>13</sub>H<sub>9</sub>BN<sub>2</sub> [M+H]<sup>+</sup>: 193.0766, Found: 193.0757.

## Synthesis of 1-benzyl-2-(4-cyano-2-iodobenzyl)pyridin-1-ium bromide (7a)

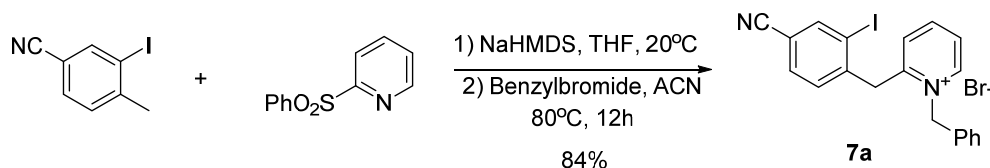

To a mixture of 2-(phenylsulfonyl)pyridine (43.85 g, 0.2 mol) and 3-iodo-4-methylbenzonitrile (51.04 g, 0.21 mol) in THF (265 mL) was added NaHMDS (2.0 M solution in THF, 100 mL, 0.2 mol) slowly in 1 h at 20-25 °C. The reaction mixture was stirred at 25 °C for another 2-4 hours until HPLC showed starting material 3-iodo-4-methylbenzonitrile completely consumed. Water (118 mL) was added, followed by phase cut to remove aqueous layer. Organic layer was washed with 10% NaHCO<sub>3</sub> solution (60 mL), then concentrated. Acetonitrile (200 mL) was added, followed by distillation to a final volume of ~185 mL. A sample was taken to make sure water content was <1 wt% (Karl Fischer), otherwise additional acetonitrile was added for further azeotropic distillation to water level at <1%. Benzylbromide (37.39 g, 0.22 mol) was added, and the reaction mixture was stirred at 80 °C for 12 h. After cooling to 20 °C, MeTHF (120 mL) was added. Desired product **7a** was isolated as white solid after filtration and drying in oven at 60 °C under vacuum (82.2 g, 84% isolated yield over two steps). M.p. 202-204 °C. <sup>1</sup>H NMR (CD<sub>3</sub>OD, 500 M Hz) δ 9.20 (dd, *J* = 1.0, 5.0 Hz, 1H), 8.52 (t, *J* = 7.5 Hz, 1H), 8.29 (d, *J* = 1.5 Hz, 1H), 8.12 (t, *J* = 7.0 Hz, 1H), 7.79 (dd, *J* = 1.5, 8.0 Hz, 1H), 7.50-7.40 (m, 5H), 7.35 (d, *J* = 7.0 Hz, 1H), 6.05 (s, 2H). <sup>13</sup>C NMR (CD<sub>3</sub>OD, 125 M Hz) δ 156.8, 148.6, 147.8, 144.4, 144.1, 134.0, 133.4, 133.1, 130.9, 130.8, 130.69, 130.68, 129.3, 128.0, 128.0, 117.7, 114.9, 102.1, 63.0. HRMS-EI calcd for C<sub>20</sub>H<sub>16</sub>IN<sub>2</sub> [M]<sup>+</sup>: 411.0353, Found: 411.0360. Note: the two bridging

benzylic protons are exchangeable with deuterium in CD<sub>3</sub>OD. The methylene protons appear in both <sup>1</sup>H and <sup>13</sup>C NMR spectra when CD<sub>3</sub>OH was used as NMR solvent; <sup>1</sup>H NMR (CD<sub>3</sub>OH, 500 M Hz) δ 9.20 (dd, *J* = 6.5 Hz, 1H), 8.50 (t, *J* = 7.5 Hz, 1H), 8.28 (s, 1H), 8.10 (t, *J* = 7.0 Hz, 1H), 7.77 (dd, *J* = 1.0, 7.5 Hz, 1H), 7.48-7.38 (m, 5H), 7.34 (d, *J* = 7.5 Hz, 1H), 6.04 (s, 2H), 4.72 (s, 2H). <sup>13</sup>C NMR (CD<sub>3</sub>OH, 125 M Hz) δ 156.7, 148.5, 147.7, 144.3, 144.1, 133.9, 133.3, 133.0, 130.8, 130.6, 130.5, 129.2, 127.8, 117.6, 114.8, 102.1, 62.9, 44.9.

### Synthesis of 1-benzyl-2-(4-cyano-2-iodobenzyl)pyridin-1-ium bromide (7b)

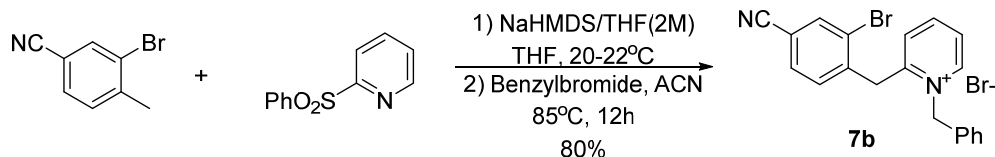

To a mixture of 2-(phenylsulfonyl)pyridine (32.89 g, 0.15 mol) and 3-bromo-4-methylbenzonitrile (30.88 g, 0.158 mol) in THF (165 mL) was added NaHMDS (2.0 M solution in THF, 150 mL, 0.3 mol) slowly in 1 h at 20-25 °C. The reaction mixture was stirred at 25 °C for another 2-4 hours until HPLC showed the starting material 3-bromo-4-methylbenzonitrile consumed. Water (89 mL) was added, followed by phase cut to remove aqueous layer. Organic layer was washed with 10% aqueous NaHCO<sub>3</sub> (45 mL), then concentrated. Acetonitrile (150 mL) was added, followed by distillation to a final volume of ~120 mL. A sample was taken to make sure water content was <1 wt% (Karl Fischer), otherwise additional acetonitrile was added for further azeotropic distillation to water level at <1%. Benzylbromide (28.05 g, 0.165 mol) was added, and the reaction mixture was stirred at 80 °C for 12 h. After cooling to 20 °C, MeTHF (86 mL) was added. Desired product **7b** was isolated as white solid after filtration and drying in oven at 60 °C under vacuum (53.4 g, 80% isolated yield over two steps). M.p. 193-195°C. <sup>1</sup>H NMR (CD<sub>3</sub>OD, 500 M Hz) δ 9.19 (d, *J* = 6.0 Hz, 1H), 8.53 (dt, *J* = 1.0, 8.0 Hz, 1H), 8.11 (dt, *J* = 1.0, 7.0 Hz, 1H), 8.06 (d, *J* = 1.5 Hz, 1H), 7.76 (dd, *J* = 1.5, 7.5 Hz, 1H), 7.54-7.40 (m, 5H), 7.32 (d, *J* = 7.0 Hz, 1H), 6.06 (s, 2H). <sup>13</sup>C NMR (CD<sub>3</sub>OD, 125 M Hz) δ 156.7, 148.6, 147.9, 140.7, 137.9, 134.1, 133.5, 133.4, 130.8, 130.7, 130.5, 129.1, 128.0, 126.5, 117.9, 115.2, 63.0. Note: the two bridging benzylic protons are exchangeable with deuterium in CD<sub>3</sub>OD. The methylene protons appear in both <sup>1</sup>H and <sup>13</sup>C NMR spectra when CD<sub>3</sub>OH is used as NMR solvent; <sup>1</sup>H NMR (CD<sub>3</sub>OH, 500 M Hz) δ 9.18 (d, *J* = 6.0 Hz, 1H), 8.51 (t, *J* = 8.0 Hz, 1H), 8.10 (t, *J* = 7.0 Hz, 1H), 8.06 (s, 1H), 7.75 (d, *J* = 8.0 Hz, 1H), 7.52-7.38 (m, 5H), 7.31 (d, *J* = 7.0 Hz, 1H), 6.04 (s, 2H), 4.72 (s, 2H). <sup>13</sup>C NMR δ (CD<sub>3</sub>OH, 125 M Hz) 156.6, 148.5, 147.7, 140.6, 137.8, 134.0, 133.4, 133.3, 130.7, 130.6, 130.4, 129.0, 127.9, 126.4, 117.8, 115.1, 62.8, 40.3. HRMS-EI calcd for C<sub>20</sub>H<sub>16</sub>BrN<sub>2</sub> [M]<sup>+</sup>: 363.0491, Found: 363.0494.

### (*E*)-4-((1-benzylpyridin-2(1H)-ylidene)methyl)-3-bromobenzonitrile (**8**)

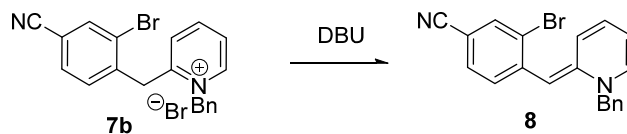

A 100 mL reactor was charged with 1.0 g (2.25 mmol) of 1-benzyl-2-(2-bromo-4-cyanobenzyl)pyridin-1-ium bromide (**7b**) under argon, 5 ml DMF and 0.67 mL (4.5 mmol) DBU were added. The mixture was sparged with Ar for 5 min before heating to 100 °C for 4 h. Then the mixture was cooled down to rt over 30 min. 10 mL water was added over 15 min, then cool down to 10 °C and hold for 30 min. The resulting bright red solid was filtered and washed with 10 mL water. The solid was dried in vacuum oven at 40 °C for 14 h. 0.82 g (2.16 mmol) red solid **8** was obtained, 96% yield. <sup>1</sup>H NMR (CD<sub>3</sub>SOCD<sub>3</sub>, 600 M Hz) δ 7.78 (d, *J* = 1.7 Hz, 1H), 7.55 (d, *J* = 7.0 Hz, 1H), 7.43-7.48 (m, 2H), 7.40 (t, *J* = 7.7 Hz, 2H), 7.29 (t, *J* = 7.5 Hz, 1H), 7.27 (d, *J* = 7.8 Hz, 2H), 7.17 (d, *J* = 9.5 Hz, 1H), 6.86 (t, *J* = 7.8 Hz, 1H), 5.92 (dt, *J* = 6.6 Hz, 1.2 Hz, 1H), 4.94 (s, 2H), 4.82 (s, 1H); <sup>13</sup>C NMR (CD<sub>3</sub>SOCD<sub>3</sub>, 150 M Hz) δ 145.9, 144.2, 141.5, 136.1, 135.9, 133.2, 131.3, 129.2, 127.9, 127.3, 124.2, 120.6, 119.2, 118.6, 105.5, 103.1, 89.7, 56.8. NMR analyses (attached) confirmed the *E*-configuration of the free base.

### Synthesis of 1-benzyl-1H-indeno[2,1-b]pyridine-6-carbonitrile from 1-benzyl-2-(4-cyano-2-iodobenzyl)pyridin-1-ium bromide via Pd-catalyzed cyclization (**9**)

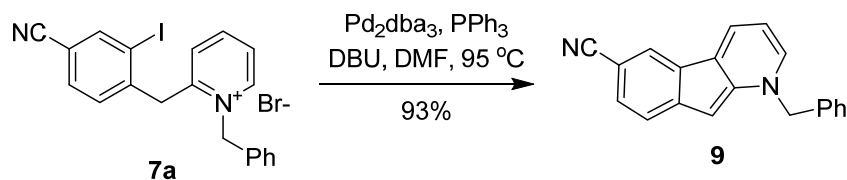

A 500 mL reactor was charged with 1-benzyl-2-(4-cyano-2-iodobenzyl)pyridin-1-ium bromide (33.72 g, 68.65 mmol), DMF (111.6 g) and DBU (31.36 g, 206 mmol). The mixture was purged with nitrogen for at least 30 minutes until O<sub>2</sub> level was < 0.5% (reaction is very sensitive to the oxygen; purge the reaction mixture thoroughly with nitrogen is necessary to achieve full conversion). A mixture of Pd<sub>2</sub>dba<sub>3</sub> (0.64 g, 0.7 mmol) and DMF (8.5 mL) prepared in a separate flask under nitrogen was added, followed by a solution of PPh<sub>3</sub> (0.71 g, 2.71 mmol) in DMF (8.5 mL). The mixture was heated to 95-100°C (maintain the N<sub>2</sub> bubbling until T = 70 °C.) and stirred at 95 °C for 12 to 18 hours. When a sample of HPLC analysis indicated a >99% conversion, the reaction mixture was cooled to 20-25 °C. Water (269.76 g) was added at such a flow rate that the batch temperature was maintained at <40 °C. The reaction was cooled and stirred at 20 °C for at least 1 hour before it was discharged to a filter. The wet cake was rinsed with water (85 mL) and dried overnight at ~ 50 °C under vacuum until water level was <0.5%. Desired product was isolated as a deep red crystalline solid (18.0 g, 93% isolated yield). M.p. 161-163 °C. <sup>1</sup>H NMR (CD<sub>3</sub>SOCD<sub>3</sub>, 500 M Hz) δ 8.68-8.66 (m, 2H), 8.37 (d, *J* = 6.0 Hz, 1H), 7.59 (d, *J* = 8.0 Hz, 1H),

7.53 (d,  $J = 8.0$  Hz, 1H), 7.36-7.34 (m, 4H), 7.31-7.28 (m, 1H), 6.91 (t,  $J = 7.0$  Hz, 1H), 6.32 (s, 1H), 5.67 (s, 2H).  $^{13}\text{C}$  NMR ( $\text{CD}_3\text{SOCD}_3$ , 125 MHz)  $\delta$  142.4, 140.7, 136.5, 135.6, 128.8, 128.6, 127.9, 127.4, 127.4, 125.7, 125.7, 122.1, 121.7, 118.3, 105.4, 96.4, 86.5, 57.5. HRMS-EI calcd for  $\text{C}_{20}\text{H}_{15}\text{N}_2$   $[\text{M}+\text{H}]^+$ : 283.1229, Found: 283.1209.

### Synthesis of 1-benzyl-1H-indeno[2,1-b]pyridine-6-carbonitrile from 1-benzyl-2-(4-cyano-2-bromobenzyl)pyridin-1-ium bromide (9)

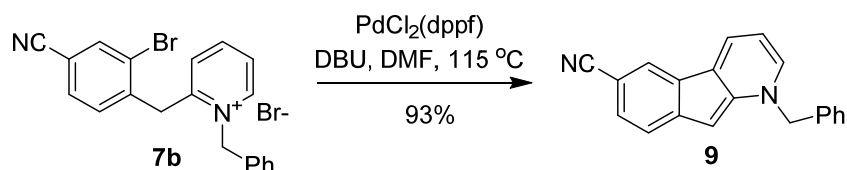

A reactor was charged with 1-benzyl-2-(4-cyano-2-bromobenzyl)pyridin-1-ium bromide (22.2 g, 50.0 mmol), DMF (73.6 g) and DBU (22.8 g, 150 mmol). The mixture was purged with nitrogen for at least 30 minutes until  $\text{O}_2$  level was  $< 0.5\%$ . A mixture of  $\text{PdCl}_2(\text{dppf})$  (0.51 g, 0.625 mol) and DMF (10.4 g) prepared in a separate flask under nitrogen was added. The mixture was heated to  $115\text{ }^\circ\text{C}$  (maintaining  $\text{N}_2$  bubbling until  $T = 80\text{ }^\circ\text{C}$ ) and stirred at  $115\text{ }^\circ\text{C}$  for about 2 to 8 hours. When a sample of HPLC analysis indicated an  $>99\%$  conversion, the reaction mixture was cooled to  $20\text{-}25\text{ }^\circ\text{C}$ . Water (178 g) was added at such a rate that the reaction temperature was maintained at  $<40\text{ }^\circ\text{C}$ . The reaction was cooled and stirred at  $20\text{ }^\circ\text{C}$  for at least 1 hour before it was filtered. The wet cake was rinsed with water (60 mL) and dried overnight at  $\sim 50\text{ }^\circ\text{C}$  under vacuum until water level was  $<0.5\%$ . Desired product was isolated as red crystalline solid, 13.13 g, 46.5 mmol, 93% isolated yield.

### Synthesis of 1-benzyl-1H-indeno[2,1-b]pyridine-6-carboxamide (11)

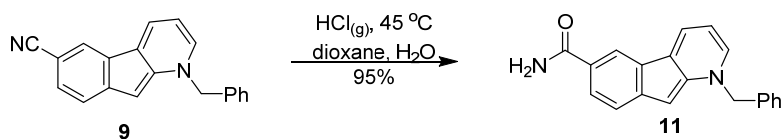

To a 250 mL reactor was added 1-benzyl-1H-indeno[2,1-b]pyridine-6-carbonitrile (18.78 g, 66.50 mmol), 1,4-dioxane (167 mL) and water (3.6 mL). The reaction mixture was stirred under nitrogen, while HCl gas (24.2 g, 663 mmol) was bubbled in slowly for about 2-4 h. Reaction is exothermic; the addition rate was adjusted to keep the reaction temperature  $<40\text{ }^\circ\text{C}$ . Afterwards, the reaction mixture was stirred at  $\sim 45\text{ }^\circ\text{C}$  for 24-48 hours until a sample analysis by HPLC indicated an  $>99\%$  conversion. At the end of the reaction, excess amount of HCl and part of the solvent 1,4-dioxane (total  $\sim 81\text{ mL}$ ) were removed by rotavap, and water (36.6 mL) was added slowly keeping the reaction temperature at  $\sim 40\text{ }^\circ\text{C}$ . A 20% NaOH solution (20 g, 200 mmol) was added slowly at  $40\text{ }^\circ\text{C}$ , which brought the pH  $>12$ . Additional water (97 g) was added over 1 hour, and the reaction mixture was cooled to  $20\text{ }^\circ\text{C}$ . After filtration, rinse with water (40 mL) and



dry in the oven at 50 °C under vacuum, desired product **11** was isolated as a deep red crystalline solid. 18.97 g, 95% yield. M.p. 227-229 °C. <sup>1</sup>H NMR (CD<sub>3</sub>SOCD<sub>3</sub>, 500 M Hz) δ 8.77 (s, 1H), 8.44 (d, *J* = 7.0 Hz, 1H), 8.21 (d, *J* = 7.0 Hz, 1H), 7.87 (d, *J* = 8.5 Hz, 1H), 7.79 (br s, 1H), 7.46 (d, *J* = 8.5 Hz, 1H), 7.38-7.32 (m, 4 H), 7.32-7.25 (m, 1H), 7.03 (m, 1H), 6.76 (t, *J* = 7.0 Hz, 1H), 6.19 (s, 1H), 5.59 (s, 2H). <sup>13</sup>C NMR (CD<sub>3</sub>SOCD<sub>3</sub>, 125 M Hz) δ 169.0, 142.5, 140.7, 139.9, 135.9, 135.3, 128.6, 127.8, 127.4, 127.1, 126.6, 125.2, 122.1, 122.1, 120.8, 116.8, 104.0, 85.6, 57.2. HRMS-EI calcd for C<sub>20</sub>H<sub>17</sub>N<sub>2</sub>O [M+H]<sup>+</sup>: 301.1335, Found: 301.1343.

### Synthesis of 1-benzyl-1H-indeno[2,1-b]pyridine-6-carboxamide (**12**)

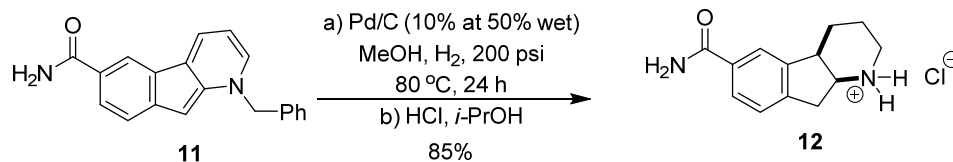

A hydrogenation reactor was charged with 20.5 g Pd/C (10% at 50% wet, 0.96 mol), 1-benzyl-1H-indeno[2,1-b]pyridine-6-carboxamide (96 g, 319 mmol) and Na<sub>2</sub>CO<sub>3</sub> (8.5 g, 80.2 mmol). Solvent MeOH (980 mL) was added, and the closed reactor was purged with nitrogen followed by hydrogen. The hydrogenation reaction was carried out at 80 °C under 220 psi hydrogen pressure for 24 hours. HPLC analysis showed the conversion was >99%. The reaction mixture was cooled to 20 °C, purged with nitrogen, and filtered through a closed filter pre-packed with Celite-545. The MeOH solution was transferred to a different reactor and distilled under vacuum to ~13 mL. Isopropanol (690 mL) was charged, and distillation was continued until 130 mL of total volume was reached. After addition of additional isopropanol (690 mL), 12 N HCl (16.2 g, 160 mmol) was added slowly for HCl salt formation. After addition of crystal seeds (0.8 g) the second portion of 12 N HCl (16.2 g, 160 mmol) was added, and the resulting slurry was cooled to 20 °C over a three hours period. After 1 h of additional stirring, the mixture was filtered. Both reactor and wet cake were rinsed with iso-propanol (14 mL). The wet cake was dried at 60 °C under vacuum for overnight to afford the desired product as white crystalline solid **12** containing ~3% water. 70.6 g (68.5 g pure product based on 97% wt, 3% water), 85% yield. M.p. 120-122 °C. <sup>1</sup>H NMR (CD<sub>3</sub>SOCD<sub>3</sub>, 500 M Hz) δ 9.20 (br, 2H), 8.01 (br, 1H), 7.83 (s, 1H), 7.79 (d, *J* = 8.0 Hz, 1H), 7.41 (d, *J* = 8.0 Hz, 1H), 7.32 (s, 1H), 3.95 (m, 1H), 3.40 (dd, *J* = 5.0, 10.0 Hz, 1H), 3.22 (dd, *J* = 6.0, 11.7 Hz, 1H), 3.00 (dd, *J* = 2.5, 17.0 Hz, 1H), 2.96 (m, 1H), 2.87 (dt, *J* = 2.5, 10.0 Hz, 1H), 2.16-2.09 (m, 1H), 2.02-1.92 (m, 1H), 1.73-1.63 (m, 1H), 1.50-1.38 (m, 1H). <sup>13</sup>C NMR (CD<sub>3</sub>SOCD<sub>3</sub>, 125 M Hz) δ 167.7, 143.3, 142.3, 133.3, 126.8, 125.1, 122.2, 56.7, 41.0, 40.9, 35.2, 22.0, 18.1. HRMS-EI calcd for C<sub>13</sub>H<sub>17</sub>N<sub>2</sub>O[M+H]<sup>+</sup>: 217.1335, Found: 217.1340.

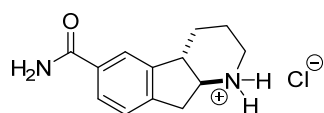

*trans*-**12**

### **2,3,4,4a,9,9a-hexahydro-1H-indeno[2,1-b]pyridine-6-carboxamide**

(*trans*-**12**): A small sample of the *trans*-isomer was isolated from mother liquor by preparative HPLC and characterized: <sup>1</sup>H NMR (CD<sub>3</sub>SOCD<sub>3</sub>, 500 M Hz) δ 10.08 (br, 1H), 9.90 (br, 1H), 8.50

(br, 2H), 7.75 (d,  $J = 7.6$  Hz, 1H), 7.74 (s, 1H), 7.34 (d,  $J = 7.6$  Hz, 1H), 3.39 (d,  $J = 12.0$  Hz, 1H), 3.27 (t,  $J = 10.0$  Hz, 1H), 3.22-3.10 (m, 2H), 3.09-2.90 (m, 2H), 2.44 (dd,  $J = 3.2, 12.4$  Hz, 1H), 2.0-1.90 (m, 2H), 1.56 (ddd,  $J = 5.4, 12.0, 17.0$  Hz, 1H).  $^{13}\text{C}$  NMR ( $\text{CD}_3\text{SOCD}_3$ , 125 MHz)  $\delta$  167.5, 141.9, 141.8, 133.1, 126.3, 124.1, 120.8, 62.1, 44.5, 44.2, 33.4, 24.7, 21.7. HRMS-EI calcd for  $\text{C}_{13}\text{H}_{17}\text{N}_2\text{O}[\text{M}+\text{H}]^+$ : 217.1335, Found: 217.1335.

### Synthesis of ( $\pm$ ) 2,3,4,4a,9,9a-hexahydro-1H-indeno[2,1-b]pyridine-6-carbonitrile

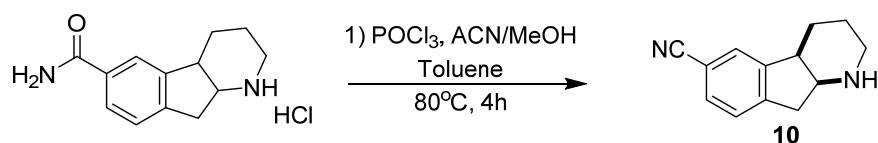

A 500 mL flask was charged with 1-benzyl-1H-indeno[2,1-b]pyridine-6-carboxamide (27.0 g, 97wt%, 103.6 mmol). Toluene (176 g, 200 mL) was added, followed by acetonitrile (53.2 g, 67.7 mL) and methanol (3.51 g, 4.4 mL, 110 mmol).  $\text{POCl}_3$  (33.43 g, 218 mmol) was added and the mixture was heated to 80-85 °C. Reaction mixture was stirred at this temperature for 4 hours, and sample was taken for analysis by HPLC to make sure conversion was >99%. The batch was cooled to 55-60 °C, and distilled to remove ~154 mL of solvent mixture. (Caution: The distillate contains  $\text{POCl}_3$ . Keep this distillate separate from other waste streams). The mixture was cooled to 35-40 °C, and water (203 g) was added to quench the reaction mixture. (CAUTION: Exothermic! Adjust the charge rate to control the batch temperature at no more than 50 °C). The reaction was cooled to 30-35 °C and neutralized with 50% NaOH solution (46.9 g, 586 mmol) slowly to bring the pH to 9.5-10. (Caution: Exothermic! Adjust the charge rate to control the temperature at NMT 45 °C). The reaction was cooled to 30-35 °C, and agitation was stopped for a phase separation. The lower phase was discarded as waste. The organic phase was rinsed by  $\text{H}_2\text{O}$  (80 g). The organic layer was filtered through a celite pad, and additional amount of toluene (105 g, 120 mL) was used to rinse the filter. The filtrate was charged back into a clean reactor and concentrated under vacuum at 55-60 °C to remove toluene (~208 mL). The batch was cooled to 30-35 °C, and charged with crystal seeds (5 mg) as a suspension in heptane (0.5 mL) to make sure crystallization starts. Additional heptane (152 g, 220 mL) was added slowly, and the batch was stirred at 30-35 °C for 30 minutes then cooled to 10 °C. After stirring for another 3 hours, the batch was filtered. The wet cake was rinsed with a solvent mixture of toluene and heptane (V:V = 1:9). After drying overnight at 45 °C, the desired product *rac*-**10** (16.22 g, 79% yield) was obtained as white solid. M.p. 88-90 °C.  $^1\text{H}$  NMR ( $\text{CD}_3\text{SOCD}_3$ , 500 MHz)  $\delta$  7.63 (s, 1H), 7.57 (d,  $J = 7.5$  Hz, 1H), 7.40 (d,  $J = 7.5$  Hz, 1H), 3.52 (m, 1H), 3.00 (q,  $J = 4.5$ , 1H), 2.90 (dd,  $J = 5.0, 16.0$  Hz, 1H), 2.66-2.61 (m, 2H), 2.47 (dd,  $J = 1.0, 1.5$  Hz, 1H), 2.16 (dd,  $J = 14.0, 3.5$  Hz, 1H), 1.92 (br s, 1H), 1.82-1.78 (m, 1H), 1.34-1.31 (m, 1H), 1.20-1.15 (m, 1H).  $^{13}\text{C}$  NMR ( $\text{CD}_3\text{SOCD}_3$ , 125 MHz)  $\delta$  150.2, 146.9, 130.3, 126.3, 126.0, 119.6, 108.5, 58.1, 43.7, 42.9, 39.2, 23.7, 21.8. HRMS-EI calcd for  $\text{C}_{13}\text{H}_{15}\text{N}_2$   $[\text{M}+\text{H}]^+$ : 199.1230, Found: 199.1235.

## Synthesis of (*4aR,9aS*)-2,3,4,4a,9,9a-hexahydro-1H-indeno[2,1-b]pyridine-6-carbonitrile *D*-DBTA salt (**2**·0.5*D*-DBTA)

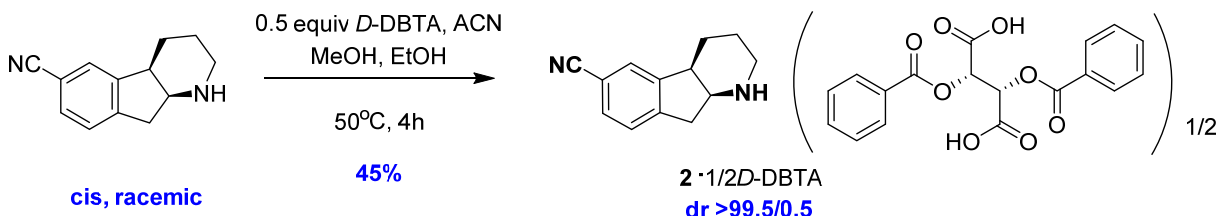

A 250 mL reactor was charged with ( $\pm$ ) **2,3,4,4a,9,9a-hexahydro-1H-indeno[2,1-b]pyridine-6-carbonitrile** (16.18 g, 81.61 mmol) and acetonitrile (93.84 g, 119.2 mL). The mixture was heated to 50 °C, and a solution of (*D*)-dibenzoyl-tartaric acid (7.29 g, 20.35 mmol) in acetonitrile (75.98 mL) was added slowly. After ~10% of the dibenzoyl-tartaric acid solution was added over half an hour, seed crystals (32 mg) were added as a suspension in acetonitrile (0.32 g). The remaining dibenzoyl-tartaric acid solution was added in 4.5 hours, and the batch was cooled to 20 °C slowly over 4 hours. After stirring at 20 °C for 2 hours, a sample of the slurry was filtered and analyzed by chiral HPLC, which showed the solid was the chiral amine salt with ~95% de. The batch was filtered, and both the reactor and wet cake were rinsed with acetonitrile (53.23 g, 67.6 mL) and ethanol (17.80 g, 22.5 mL). The wet solid was charged back into the reactor. MeOH (29.29 g, 37.07 mL) and EtOH (78.80 g) were added, and the mixture was stirred at 50 °C for 2 hours. After cooling to 20 °C over 2 hours and stirring at 20 °C for another 2 hours, the slurry was filtered. After rinse with ethanol (20.30 g) the wet cake was dried under vacuum at 55-60 °C overnight. Product **2**·0.5*D*-DBTA was isolated as white solid, 13.87 g, 45% isolated yield. M.p. 190-192 °C.  $[\alpha]_{\text{D}}^{23} = +138.8^\circ$  (c 0.46, MeOH).  $^1\text{H NMR}$  ( $\text{CD}_3\text{SOCD}_3$ , 500 MHz)  $\delta$  7.99 (d,  $J = 7.5$  Hz, 4H), 7.67-7.61 (m, 6H), 7.52 (t,  $J = 7.5$  Hz, 4 H), 7.37 (d,  $J = 9.0$  Hz, 2H), 5.62 (s, 2H), 3.80 (dd,  $J = 5.5, 8.5$  Hz, 2 H), 3.20 (dd,  $J = 4.5, 10.0$  Hz, 2H), 3.01 (dd,  $J = 5.5, 17.0$  Hz, 2 H), 2.88 (dd,  $J = 2.5, 17.0$  Hz), 2.84-2.75 (m, 2H), 2.69 (t,  $J = 10.0$  Hz, 2H), 2.05-1.96 (m, 2H), 1.83-1.74 (m, 2H), 1.50-1.42 (m, 2H), 1.32-1.22 (m, 2H).  $^{13}\text{C NMR}$  ( $\text{CD}_3\text{SOCD}_3$ , 125 MHz)  $\delta$  169.0, 164.9, 147.3, 144.9, 133.1, 131.0, 130.2, 129.2, 128.5, 126.7, 126.3, 119.2, 109.3, 73.7, 56.3, 41.3, 41.2, 36.2, 22.6, 19.1. HRMS-EI calcd for  $\text{C}_{13}\text{H}_{15}\text{N}_2$   $[\text{M}+\text{H}]^+$ : 199.1230, Found: 199.1229.

### Chiral HPLC of the product **2**:

Method: Chiralpak IA, 80/20 heptane/1%  $\text{Et}_2\text{NH}$  in 1-PrOH, 1.5 mL/min, 25 °C, 220 nm. Major enantiomer: 4.80 min (100%); Minor enantiomer: 6.50 min (0%). Enantiomeric Excess: 100%.

*Chiral HPLC spectrum of the isolated product:*

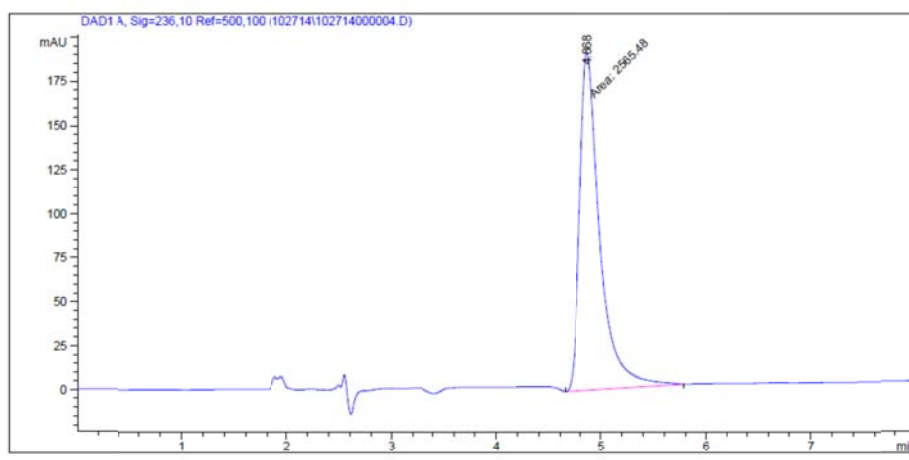

Signal 1: DAD1 A, Sig=236,10 Ref=500,100

| Peak # | RetTime [min] | Type | Width [min] | Area [mAU*s] | Height [mAU] | Area %   |
|--------|---------------|------|-------------|--------------|--------------|----------|
| 1      | 4.868         | MM   | 0.2241      | 2565.48438   | 190.83150    | 100.0000 |

Totals : 2565.48438 190.83150

*Chiral HPLC spectrum of the racemic product*

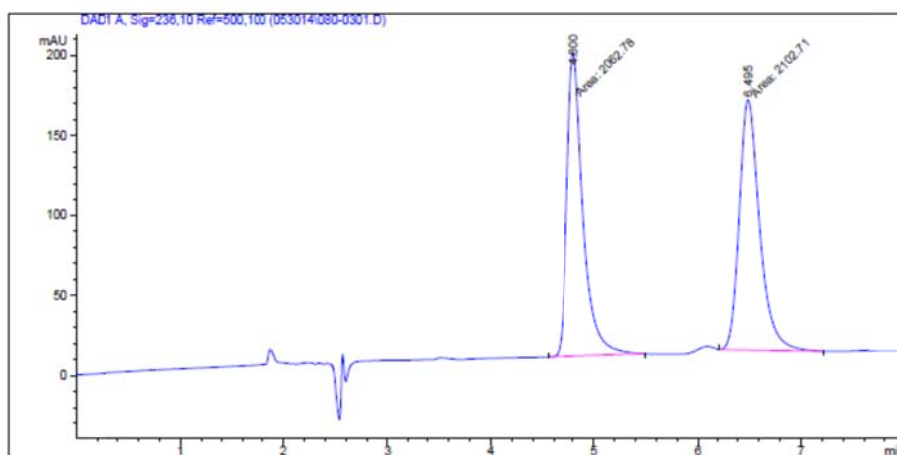

Area Percent Report

Sorted By : Signal  
Multiplier: : 1.0000  
Dilution: : 1.0000  
Use Multiplier & Dilution Factor with ISTDs

Signal 1: DAD1 A, Sig=236,10 Ref=500,100

| Peak # | RetTime [min] | Type | Width [min] | Area [mAU*s] | Height [mAU] | Area %  |
|--------|---------------|------|-------------|--------------|--------------|---------|
| 1      | 4.800         | MM   | 0.1816      | 2062.77563   | 189.31041    | 49.5207 |
| 2      | 6.495         | MM   | 0.2241      | 2102.70996   | 156.40251    | 50.4793 |

Totals : 4165.48560 345.71292

## Synthesis of 1-benzyl-6-cyano-9H-indeno[2,1-b]pyridin-1-ium bromide (**13**)

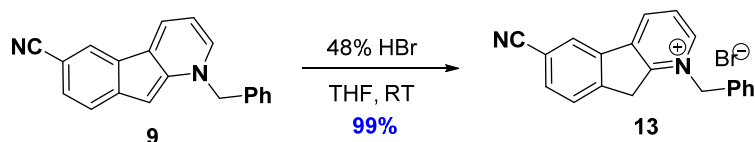

In a 2.0 L reactor with thermo couple and mechanical stirring, 1-benzyl-1H-indeno[2,1-b]pyridine-6-carbonitrile (100 g, 354.2 mmol) and THF (1.0 L) were added. The mixture was stirred at ~16 °C to obtain a solution. Hydrobromic acid (48 wt% aq., 48.1 mL, 1.2 eq) was slowly charged over 10-20 min. Exotherm was observed which brought reaction mixture to ~28 °C, and yellow precipitate formed instantly. After 1 h, the slurry was filtered. The cake was rinsed with THF (500 mL) and dried at 50 °C under vacuum for 20 h to give a light yellow solid **13** (127.4 g, 99% yield). M.p. 220-222°C. <sup>1</sup>H NMR (CD<sub>3</sub>OD, 500 M Hz) δ 9.08 (d, *J* = 8.0 Hz, 1H), 8.88 (d, *J* = 6.0 Hz, 1H), 8.56 (s, 1H), 8.16 (t, *J* = 7.0 Hz, 1H), 7.932 (s, 2H), 7.55-7.45 (m, 5H), 6.02 (s, 2H). <sup>13</sup>C NMR (CD<sub>3</sub>OD, 125 M Hz) δ 161.3, 146.0, 143.5 (2C), 142.2, 138.5, 138.4, 135.1, 133.2, 131.1, 130.9 (2C), 130.2 (2C), 128.4, 127.9, 127.6, 119.3, 113.7, 63.1. Note: the two bridging benzylic protons are exchangeable with deuterium in CD<sub>3</sub>OD. The methylene protons appear in both <sup>1</sup>H and <sup>13</sup>C NMR spectra when CD<sub>3</sub>OH was used as NMR solvent; <sup>1</sup>H NMR (CD<sub>3</sub>OH, 500 M Hz) δ 9.09 (d, *J* = 6.5 Hz, 1H), 8.89 (d, *J* = 5.5 Hz, 1H), 8.56 (s, 1H), 8.16 (t, *J* = 6.0 Hz, 1H), 7.93 (d, *J* = 7.0 Hz, 1H), 7.91 (d, *J* = 7.0 Hz, 1H), 7.55-7.45 (m, 5H), 6.03 (s, 2H), 4.67 (s, 2H). <sup>13</sup>C NMR (CD<sub>3</sub>OH, 125 M Hz) δ 161.0, 145.8, 143.2, 141.9, 138.2, 138.1, 134.8, 132.9, 130.8, 130.6, 129.9, 128.1, 127.6, 127.3, 119.1, 113.3, 62.9, 38.2; HRMS-EI calcd for C<sub>20</sub>H<sub>15</sub>N<sub>2</sub> [M+H]<sup>+</sup>: 283.1229, Found: 283.1235.

## Synthesis of (4*R*,9*S*)-1-benzyl-2,3,4,4*a*,9,9*a*-hexahydro-1H-indeno[2,1-b]pyridine-6-carbonitrile (**14**) through Asymmetric hydrogenation

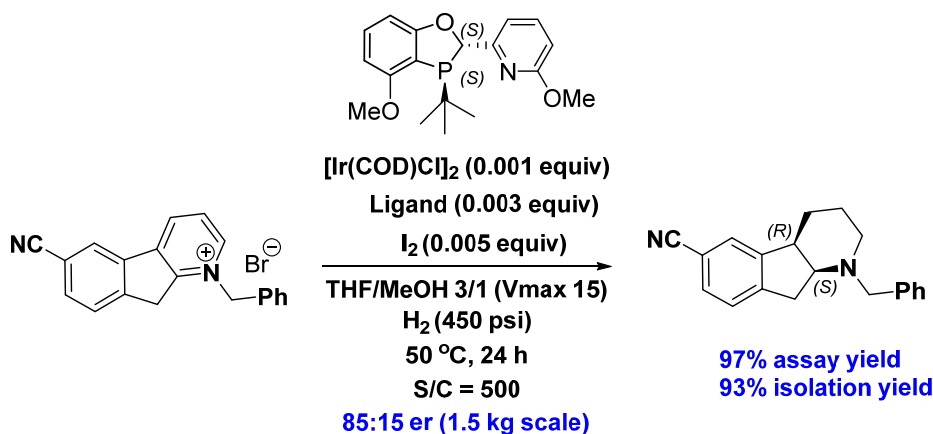

**Catalyst preparation:** The iridium complex [Ir(COD)Cl]<sub>2</sub> (2.8 g, 4.129 mmol) and chiral ligand **L5** (4.105 g, 12.388 mmol) were charged into a 1 L Schlenk flask with a stir bar under argon. Anhydrous degassed THF (200 mL) was added. The resulting clear yellow solution was stirred at

RT for 20 – 30 min. A solution of I<sub>2</sub> in anhydrous THF (100 mL) was charged. The resulting red-brown catalyst solution was stirred at room temperature for 5 min.

**Asymmetric hydrogenation:** Starting material 1-benzyl-6-cyano-9H-indeno[2,1-b]pyridin-1-ium bromide (1.50 Kg, 4.129 mol), THF (16.063 L) and MeOH (5.454 L) were charged into a 50 L hydrogenation reactor and sealed. Agitation was started. The reaction mixture was sparged with N<sub>2</sub> for 30-45 min. Then the catalyst solution was transferred into the reactor via Teflon tubing under N<sub>2</sub> pressure. The reaction mixture was then purged with 50 psi H<sub>2</sub> for 3 times, pressurized to 350 psi H<sub>2</sub>, heated to 50 °C and finally pressurized to 450 psi H<sub>2</sub> and stir at this pressure and 50 °C for 24 h. A sample of the reaction mixture was taken, which was treated with Et<sub>2</sub>NH and analyzed by HPLC, LC-MS & chiral HPLC to confirm >99.5% conversion and >85:15 er of the product. The reaction mixture was cooled to 23 °C, vented, purged with N<sub>2</sub> and vented again. HPLC assay indicated ~98% yield. The reaction mixture, a red slurry with white solid on the bottom, was transferred into a 50 L reactor and rinsed with THF (10 L) and MeOH (4 L). N-Acetyl-L-cysteine solid (67.4 g, 0.413 mol) was charged. The mixture was stirred at room temperature for 5-10 min then concentrated under vacuum to minimum stirrable volume (~5 L). Dry toluene (9 L, 6 V) was charged, and the slurry was concentrated under vacuum to ~9 L to remove remaining THF and methanol. After more toluene (6 L) was charged, the mixture was cooled to 35-40 °C and treated with 10% NaOH (4.955 Kg, 3 eq) with agitation for 15-30 min so that all the white solid was dissolved. The mixture was cooled to 25 °C and the layers were separated. The bottom aq. layer was drained. The organic layer was rinsed with water (6.0 L), and concentrated at ~50 °C under vacuum to ~5 L. The isolated yield is ~93% (1.107 Kg, 3.84 mol) after assay of the solution in toluene, which was used in next step, debenzylation, without further purification. M.p. 50-52 °C. <sup>1</sup>H NMR (CD<sub>3</sub>Cl<sub>3</sub>, 500 M Hz) δ 7.44 (d, *J* = 7.5 Hz, 1H), 7.42 (s, 1H), 7.32-7.21 (m, 6H), 3.78 (d, *J* = 14.0 Hz, 1H), 3.53 (d, *J* = 14.0 Hz, 1H), 3.43-3.40 (m, 1H), 3.15-3.09 (m, 2H), 2.80 (dd, *J* = 6.0, 16.0 Hz, 1H), 2.52-2.49 (m, 1H), 2.43-2.39 (m, 1H), 1.85-1.81 (m, 1H), 1.65-1.46 (m, 3H). <sup>13</sup>C NMR (CD<sub>3</sub>Cl<sub>3</sub>, 125 M Hz) δ 148.0, 147.6, 138.8, 130.6, 128.6, 128.2, 126.9, 126.4, 126.0, 119.6, 109.9, 63.6, 59.7, 48.7, 43.5, 32.0, 26.2, 22.8. HRMS-EI calcd for C<sub>20</sub>H<sub>21</sub>N<sub>2</sub> [M+H]<sup>+</sup>: 289.1699, Found: 289.1718.

### Synthesis of (4a*R*,9a*S*)-2,3,4,4a,9,9a-hexahydro-1H-indeno[2,1-b]pyridine-6-carbonitrile (19)

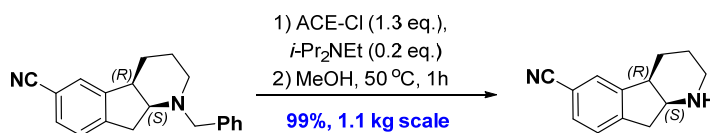

To a solution of the crude (4a*R*,9a*S*)-1-benzyl-2,3,4,4a,9,9a-hexahydro-1H-indeno[2,1-b]pyridine-6-carbonitrile (1.107 Kg, 3.84 mol, 1 equiv) in toluene (~5 L) was added dry MeCN (7.7 L). The mixture was heated to 60 °C with stirring. *N,N*-Diisopropylethylamine (133.8 mL, 0.2 eq) was charged, followed by 1-chloroethyl chloroformate (549.6 mL, 4.99 mol, 1.3 equiv) slowly over 10 min. The mixture was stirred at 60 °C for 1 h. A sample was taken and analyzed by HPLC & LC-MS, indicating 99.1% conversion to the chloroethyl carbamate. The mixture was

concentrated to ~ 5.0 L at 50-60 °C under vacuum. MeOH (5.5 L) was added, and the mixture was stirred at 50-55 °C for 1 h. A sample was taken and analyzed by HPLC & LC-MS indicating 100% conversion. The mixture was concentrated under vacuum at 50-60 °C to distill off MeOH/toluene (~7.8 L), during which dry toluene (9.24 L) was fed in portions to maintain reaction mixture volume ~8 L. The slurry was cooled to 25 °C and filtered. The reactor was rinsed with a mixture of toluene (2.6 L) & IPA (0.7 L) and the rinse was used to wash the wet cake. HPLC of the wet cake showed 99.6% product, 0.2% BnCl, and 0.2% SM. HPLC of the filtrate showed BnCl and toluene as major components with small amount of product present. The wet cake was charge back into the reactor, followed by addition of water (5.5 L), toluene (11.0 L) and 50% NaOH (1.23 kg, 4 eq). The mixture was stirred at ~40 °C for ~40 minutes and then cooled to 25 °C. The layers were separated. The bottom aq. layer was drained. The purple organic layer was concentrated under vacuum at 45-50 °C to 5 L and azeotroped with EtOH (denatured with 0.5% toluene) to give a dark purple solution (~8 L) with <500 ppm water content using Karl-Fischer titration. If target (<500 ppm) is not reached, use more dry EtOH to azeotrope water out and recheck. The solution was drained into a pre-weighed clean and dry container under N<sub>2</sub>. A sample of this solution was taken and analyzed by HPLC & <sup>1</sup>H NMR assay, showing the yield is ~99% (757 g pure product). The solution (6.44 kg, ~8 L) was used in the next step without further purification.

### Synthesis of (*4aR,9aS*)-2,3,4,4a,9,9a-hexahydro-1H-indeno[2,1-b]pyridine-6-carbonitrile (**2**) *D*-DBTA salt

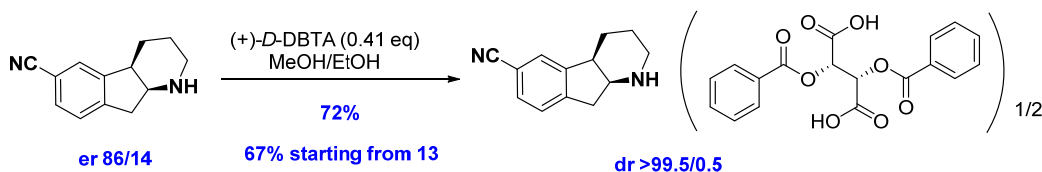

The crude (*4aR,9aS*)-2,3,4,4a,9,9a-hexahydro-1H-indeno[2,1-b]pyridine-6-carbonitrile (6.44 Kg solution in EtOH, 0.757 Kg pure, 3.818 mol) was charged to a 50 L reactor. The mixture was heated to 60 °C. A solution of dibenzoyl-*D*-tartaric acid (0.59 Kg, 1.565 mol, 0.41 eq) in dry MeOH (2.2 L) was slowly charged over 30 min. Precipitate formed after about 25% of the dibenzoyl-*D*-tartaric acid solution was charged. The mixture was stirred at 60 °C for 3 h, then cooled to 20 °C over 2 h, and held at 20 °C for 4 hours. A sample of the mixture (~10 mL) was filtered and analyzed by chiral HPLC, which showed the dr was ~99/1. The mixture was filtered, rinsed with EtOH (2 L), and the wet cake (~1.962 Kg) was charged back to the reactor. Dry MeOH (1.8 L) and dry EtOH (4.8 L) were charged. The mixture was stirred at 60 °C for 3 h, cooled to 20 °C over 2 h, and held at 20 °C for 4 h. The batch was filtered, rinsed with EtOH (2 L, 3 V), and the wet cake (1.41 kg) was dried under vacuum at 50 °C with a bleed of N<sub>2</sub> to give product as white solid, 1.037 kg, 72% isolated yield, and 66.5% total isolated yield starting from pyridinium salt **13**.

**Synthesis of (4aR,9aS)-1-(1H-benzo[d]imidazole-5-carbonyl)-2,3,4,4a,9,9a-hexahydro-1H-indeno[2,1-b]pyridine-6-carbonitrile (1 – EtOAc solvate)**

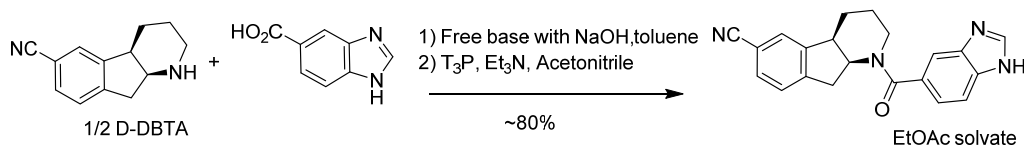

**(4aR,9aS)-2,3,4,4a,9,9a-hexahydro-1H-indeno[2,1-b]pyridine-6-carbonitrile D-DBTA salt** (56.04 g, 145 mmol) was charged to a 1 L reactor. Toluene (210 mL) and 10% aq. NaOH (116 g, 290 mmol) were added, and the mixture was stirred at 20 °C for 30 minutes followed by phase cut to remove aqueous layer. Another portion of 10% aq. NaOH (116 g, 2 eq) was charged, and the reaction mixture was stirred at 20 °C for 30 min. for a second phase cut. Again lower aqueous layer was drained. Organic layer was concentrated under vacuum, followed by addition of 1H-benzo[d]imidazole-5-carboxylic acid (25.99 g, 160 mmol) and acetonitrile (374 mL). The mixture was distilled at atmospheric pressure to remove most toluene and water. After additional acetonitrile (144 mL) was added, a sample was taken for analysis by HPLC and Karl Fischer titration to make sure toluene was <5% and water was <700 ppm. Triethylamine (80.8 mL, 4.0 eq) was charged, followed by slow addition of T<sub>3</sub>P (115.3 g, 50% solution in THF, 181 mmol, 1.25 eq) at internal temperature < 0 °C. Reaction mixture was stirred at 0 °C for overnight, and a sample was taken for HPLC analysis to confirm conversion was >99%. DI water (144 mL) was added to quench the reaction slowly, followed by addition of NaOH solution (37.9 mL, 50 wt%, 5.0 eq.). The mixture was concentrated to 250 mL (2/5 of total volume) under vacuum to remove acetonitrile, followed by addition of MeTHF (632.5 mL, 22 vol) and adjust pH to 6-7 with 6 N HCl (65.2 mL, d= 1.1, 2.7 eq) and 50% NaOH (12.1 mL, 1.6 eq) keeping internal temperature at 30-40 °C. After phase cut at 35 °C, the organic layer was rinsed with 2% NaHCO<sub>3</sub> (144 mL) once, then concentrated under atmosphere pressure to 350 mL. For crystallization, EtOAc (500 mL, 1.0 vol) was added slowly at 65-70 °C, then product seed crystals suspension in EtOAc (0.5 g in 2 mL EtOAc) was added. To the slurry more EtOAc (150 mL) was added at 65-70 °C in 2 h, and the mixture was cooled to 30 °C in 2 h. The slurry was filtered and the wet cake was rinsed with small amount of EtOAc/MeTHF (100 mL, 2/3). After drying under vacuum at 60 °C for 6 h, 44.0 g white solid was obtained (80% isolated yield, as ~0.5 EtOAc solvate). HPLC showed >99.2% purity, and GC showed 10% wt EtOAc within the solid. M.p. 170-175°C. <sup>1</sup>H NMR (CD<sub>3</sub>SOCD<sub>3</sub>, 500 M Hz) δ 8.30 (s, 1H), 7.70 (br, 1H), 7.66-7.58 (m, 3H), 7.45 (br, 1H), 7.25 (d, *J* = 8.5 Hz, 1H), 4.03 (q, *J* = 7.0 Hz, 0.7 H EtOAc), 3.27 (br, 1H), 3.11 (br, 1H), 3.00 (br, 2H), 2.01 (s, 1 H, EtOAc), 1.74 (br, 1H), 1.52 (q, *J* = 12.5 Hz, 1H), 1.30 (dq, *J* = 3.0, 13.0 Hz, 1H), 1.18 (t, *J* = 7.0 Hz, 1 H, EtOAc). <sup>13</sup>C NMR (CD<sub>3</sub>SOCD<sub>3</sub>, 125 M Hz) δ 170.8, 170.3, 147.5, 145.8, 143.5, 138.4, 138.1, 130.9, 129.9, 127.1, 126.2, 120.6, 119.1, 114.9, 114.2, 109.2, 59.7, 41.2, 32.6, 32.1, 27.8, 23.1, 20.8, 20.7, 14.0. HRMS-EI calcd for C<sub>21</sub>H<sub>19</sub>N<sub>4</sub>O [M+H]<sup>+</sup>: 343.1553, Found: 343.1544.



## Synthesis of (4aR,9aS)-1-(1H-benzo[d]imidazole-5-carbonyl)-2,3,4,4a,9,9a-hexahydro-1H-indeno[2,1-b]pyridine-6-carbonitrile hydrochloride salt (**1**)

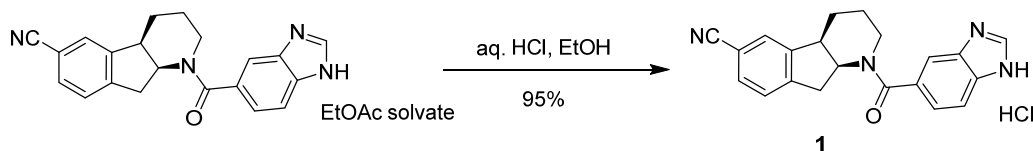

To a 1 L reactor was added (4aR,9aS)-1-(1H-benzo[d]imidazole-5-carbonyl)-2,3,4,4a,9,9a-hexahydro-1H-indeno[2,1-b]pyridine-6-carbonitrile EtOAc solvate (42.0 g, 85.85 wt%) and 200 proof absolute EtOH (151.2 g). The mixture was heated up to 50-60 °C for dissolution, and the solution was filtered to remove insoluble impurities and rinsed with EtOH (16.9 g). The concentration was determined by HPLC analysis, and based on calculation, 35.7 g pure compound was in the 210 g solution. The solution was heated to 60 °C, then aq HCl (3.52 g, 32.37 wt% by titration) was added slowly. Crystal seed (0.84 g) was added as suspension in EtOH (3.36 g). After 30 minutes, additional aq. HCl (8.81 g, 32.37%) was added slowly over 2 hours. The mixture was cooled to 5-10 °C over 2 hours and stirred for another 4 hours. The mixture was filtered, and the wet cake was rinsed with EtOH (84.0 g). After drying at 65-70 °C under vacuum for 12 hours, desired product was obtained as white solid (39.5 g, 95% yield). M.p. 245-248 °C.  $[\alpha]_D^{23} = +63.5^\circ$  (c 0.82, MeOH).  $^1\text{H NMR}$  ( $\text{CD}_3\text{SOCD}_3$ , 500 M Hz, 353 K)  $\delta$  13.85 (br, 2H), 9.41 (s, 1H), 7.89 (d,  $J = 6.2$  Hz, 1H), 7.88 (s, 1H), 7.65 (s, 1H), 7.57 (dd,  $J = 7.8, 1.1$  Hz, 1H), 7.55 (dd,  $J = 6.2, 1.1$  Hz, 1H), 7.42 (d,  $J = 7.8$  Hz, 1H), 4.77 (br, 1H), 4.01 (m, 1H), 3.27 (dd,  $J = 16.3, 10.4$  Hz, 1H), 3.18 (m, 1H), 3.03 (dd,  $J = 16.3, 10.4$  Hz, 1H), 3.03 (m, br, 1H), 2.03 (m, 1H), 1.64 (m, 1H), 1.53 (m, 1H), 1.35 (m, 1H).  $^{13}\text{C NMR}$  ( $\text{CD}_3\text{SOCD}_3$ , 125 M Hz, 353 K)  $\delta$  167.0, 147.0, 145.3, 141.0, 133.5, 131.7, 131.1, 130.4, 126.6, 125.7, 123.5, 118.5, 114.4, 112.7, 109.1, 54.8, 41.0, 39.7 (br), 32.2, 27.2, 22.3. HRMS-EI calcd for  $\text{C}_{21}\text{H}_{19}\text{N}_4\text{O}$   $[\text{M}+\text{H}]^+$ : 343.1553, Found: 343.1551.

### Chiral HPLC of the product:

Method: Chiralpak AGP, 95/5 0.1% AcOH in water/MeCN, 1.2 mL/min, 30 °C, 220 nm. Major enantiomer: 9.93 min (99.9%); Minor enantiomer: 7.70 min (0.1%). Enantiomeric Excess: 99.8%.

*Chiral HPLC spectrum of the isolated product 1:*

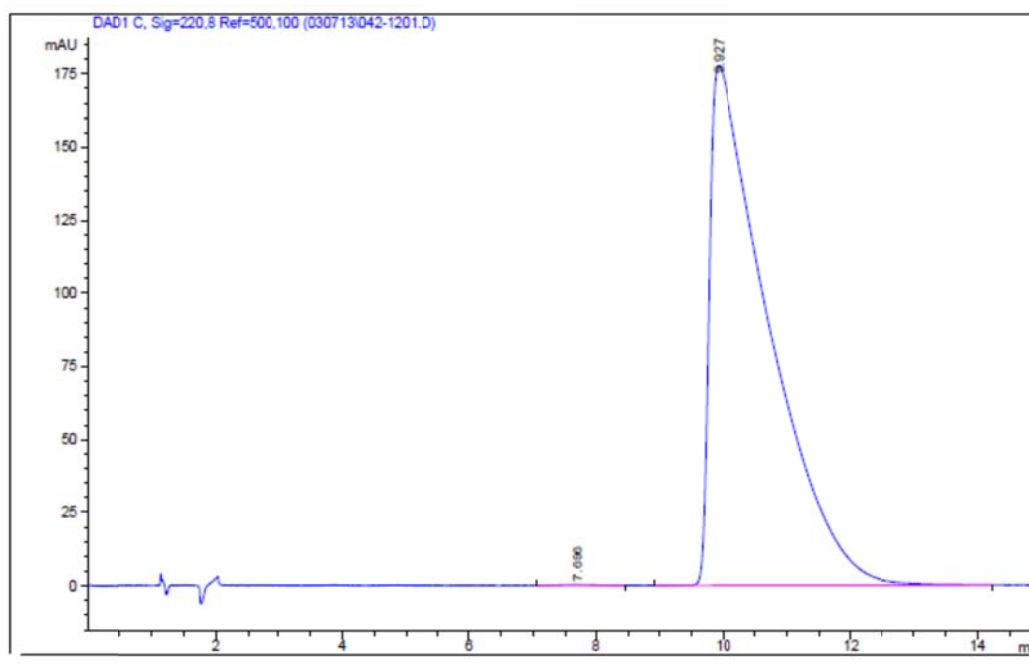

Signal 1: DAD1 C, Sig=220,8 Ref=500,100

| Peak # | RetTime [min] | Type | Width [min] | Area [mAU*s] | Height [mAU] | Area %  |
|--------|---------------|------|-------------|--------------|--------------|---------|
| 1      | 7.696         | MM   | 0.5614      | 11.31167     | 3.61642e-1   | 0.0978  |
| 2      | 9.927         | MM   | 1.0817      | 1.15545e4    | 178.03818    | 99.9022 |

Totals : 1.15658e4 178.39982

## General procedure for the Synthesis of Ligands

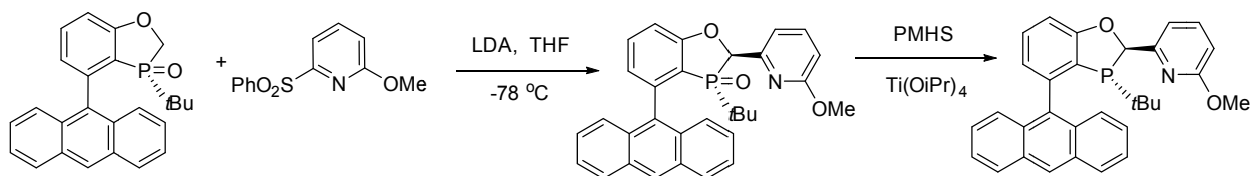

A 250 mL 3-neck round bottom flask equipped with a magnetic stir bar was charged with phosphine oxide (1.35 g, 3.493 mmol), 2-methoxy-6-(phenylsulfonyl)pyridine (0.87 g, 3.493 mmol) and THF (50 mL). The mixture was cooled down to  $-78\text{ }^{\circ}\text{C}$  with a dry ice/acetone bath. LDA (5.3 mL, 2.0 M in THF/ethyl benzene, 10.48 mmol) was added slowly and the internal temperature was kept under  $-60\text{ }^{\circ}\text{C}$ . After 2 h, a sample was taken and completed conversion was indicated from LC-MS. The mixture was quenched with methanol (5 mL) and sat  $\text{Na}_2\text{CO}_3$  solution (10 mL) was added; the mixture was further warmed to  $50\text{ }^{\circ}\text{C}$  and stir for 2 h. The crude mixture was concentrated under reduced pressure, worked up with DCM (50 mL x 2) and dried over  $\text{Na}_2\text{SO}_4$  and purified using column chromatography with 80% EtOAc/hexanes to get the desired product as a white solid after drying.

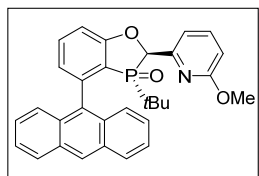

**(2R,3S)-4-(anthracen-9-yl)-3-(tert-butyl)-2-(6-methoxypyridin-2-yl)-2H-benzo[d][1,3]oxaphosphole 3-oxide**

1.12 g, 65% yield, m.p: 226.0–228.0 °C;  $[\alpha]_D^{23} = +10.7^\circ$  (c 0.05, EtOH);  $^1\text{H}$  NMR (500 MHz,  $\text{CDCl}_3$ ):  $\delta$  8.50 (s, 1H), 8.04 (d,  $J = 8.4$  Hz, 1H), 7.94 (d,  $J = 8.4$  Hz, 1H), 7.82 (s, 1H), 7.71 (t,  $J = 7.9$  Hz, 1H), 7.65 (m, 1H), 7.60 (t,  $J = 8.2$  Hz, 2H), 7.43 (dt,  $J = 7.6$  Hz, 1H), 7.40 (m, 1H), 7.35 (m, 1H), 7.31 (m, 1H), 7.13 (m, 2H), 6.65 (d,  $J = 8.2$  Hz, 1H), 5.53 (d,  $J = 8.2$  Hz, 1H), 3.79 (s, 3H), 0.53 (d,  $J = 16.2$  Hz, 9H);  $^{13}\text{C}$  NMR (125 MHz,  $\text{CDCl}_3$ ):  $\delta$  165.0 (d,  $J_{\text{C-P}} = 17.5$  Hz), 163.6 (d,  $J_{\text{C-P}} = 1.4$  Hz), 151.9 (d,  $J_{\text{C-P}} = 4.3$  Hz), 142.9 (d,  $J_{\text{C-P}} = 5.9$  Hz), 139.3 (d,  $J_{\text{C-P}} = 1.9$  Hz), 134.8 (d,  $J_{\text{C-P}} = 1.7$  Hz), 134.3 (d,  $J_{\text{C-P}} = 1.9$  Hz), 131.3 (d,  $J_{\text{C-P}} = 22.5$  Hz), 130.5 (d,  $J_{\text{C-P}} = 8.9$  Hz), 128.7 (d,  $J_{\text{C-P}} = 60.3$  Hz), 127.8 (d,  $J_{\text{C-P}} = 64.4$  Hz), 126.6 (d,  $J_{\text{C-P}} = 8.1$  Hz), 126.1 (d,  $J_{\text{C-P}} = 39.5$  Hz), 125.8 (d,  $J_{\text{C-P}} = 25.5$  Hz), 125.0, 116.1 (d,  $J_{\text{C-P}} = 83.9$  Hz), 114.4 (d,  $J_{\text{C-P}} = 3.0$  Hz), 113.4 (d,  $J_{\text{C-P}} = 5.2$  Hz), 110.3 (d,  $J_{\text{C-P}} = 2.1$  Hz), 77.8 (d,  $J_{\text{C-P}} = 55.0$  Hz), 53.5, 33.8 (d,  $J_{\text{C-P}} = 71.2$  Hz), 24.2 (d,  $J_{\text{C-P}} = 0.9$  Hz);  $^{31}\text{P}$  NMR (202 MHz,  $\text{CDCl}_3$ ):  $\delta$  60.4; HRMS (ESI)  $[\text{M}+\text{H}]^+$   $m/z$  calcd for  $[\text{C}_{31}\text{H}_{29}\text{NO}_3\text{P}]^+$  is 494.1880, found 494.1883.

An oven dried 100 mL Schlenk flask equipped with a magnetic stir bar was charged with phosphine oxide (500 mg, 1.012 mmol) and THF (20 mL) and the solution was thoroughly degassed by vacuum *purge-and-refill* with argon. The mixture was then added polymethylhydrosiloxane (1.50 g). To this solution at rt added titanium tetraisopropoxide (575 mg, 2.024 mmol). Reaction mixture was stirred at 60 °C for 14 h under argon atmosphere. The reaction was quenched with degassed 30% aqueous NaOH (10 mL) over 10 min. The resulting mixture was stirred at 60 °C for 1 h. Then the mixture was cooled to room temperature and the layers were separated under argon. The aqueous layer was further washed twice with degassed MTBE. The combined organic layers was dried over  $\text{MgSO}_4$ , loaded on to a short plug of basic alumina, and eluted with MTBE. The product was obtained as a white solid after dryness.

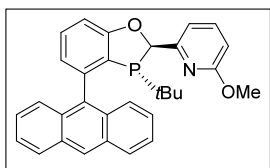

**2-((2R,3R)-4-(anthracen-9-yl)-3-(tert-butyl)-2,3-dihydrobenzo[d][1,3]oxaphosphol-2-yl)-6-methoxypyridine**

367 mg, 76% yield.  $^1\text{H}$  NMR (500 MHz,  $\text{CDCl}_3$ ):  $\delta$  8.44 (s, 1H), 8.00 (d,  $J = 8.2$  Hz, 1H), 7.94 (d,  $J = 9.4$  Hz, 2H), 7.54 (m, 2H), 7.49 (d,  $J = 8.8$  Hz, 2H), 7.41 (dt,  $J = 6.9$  Hz, 1H), 7.33 (t,  $J = 7.6$  Hz, 1H), 7.24 (d,  $J = 8.1$  Hz, 1H), 7.05 (m, 2H), 6.85 (d,  $J = 6.7$  Hz, 1H), 6.61 (d,  $J = 8.1$  Hz, 1H), 5.89 (s, 1H), 3.81 (s, 3H), 0.59 (d,  $J = 12.3$  Hz, 9H);  $^{13}\text{C}$  NMR (125 MHz,  $\text{CDCl}_3$ ):  $\delta$  165.2, 163.9 (d,  $J_{\text{C-P}} = 1.9$  Hz), 158.8 (d,  $J_{\text{C-P}} = 14.9$  Hz), 142.7 (d,  $J_{\text{C-P}} = 16.6$  Hz), 139.1 (d,  $J_{\text{C-P}} = 1.5$  Hz), 136.3 (d,  $J_{\text{C-P}} = 0.8$  Hz), 131.5 (d,  $J_{\text{C-P}} = 19.7$  Hz), 131.4, 130.8, 128.9 (d,  $J_{\text{C-P}} = 0.9$  Hz), 128.6 (d,  $J_{\text{C-P}} = 45.4$  Hz), 127.66 (d,  $J_{\text{C-P}} = 18.5$  Hz), 127.65 (d,  $J_{\text{C-P}} = 4.0$  Hz), 125.7, 125.6, 125.5 (d,  $J_{\text{C-P}} = 7.0$  Hz), 125.19 (d,  $J_{\text{C-P}} = 21.6$  Hz), 125.1, 111.6 (d,  $J_{\text{C-P}} = 4.2$  Hz), 110.3, 109.3 (d,  $J_{\text{C-P}} = 2.5$  Hz), 85.9 (d,  $J_{\text{C-P}} = 27.7$  Hz), 53.3, 31.7 (d,  $J_{\text{C-P}} = 23.8$  Hz), 27.1 (d,  $J_{\text{C-P}} = 14.6$  Hz);  $^{31}\text{P}$  NMR (202 MHz,  $\text{CDCl}_3$ ):  $\delta$  16.3; HRMS (ESI)  $[\text{M}+\text{H}]^+$   $m/z$  calcd for  $[\text{C}_{31}\text{H}_{29}\text{NO}_2\text{P}]^+$  is 478.1930, found 478.1920.

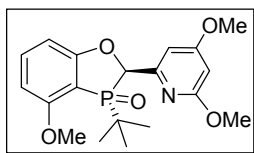

**(2S,3R)-3-(tert-butyl)-2-(4,6-dimethoxyphenyl)-4-methoxy-2H-benzo[d][1,3]oxaphosphole 3-oxide**; glassy white solid, 49% yield;  $^1\text{H}$  NMR (600 MHz,  $\text{D}_6\text{-DMSO}$ )  $\delta$  7.56 (t,  $J = 8.3$  Hz, 1H), 6.77 (dd,  $J = 8.3$ , 2.8 Hz, 1H), 6.71 (dd,  $J = 8.3$ , 4.1 Hz, 1H), 6.43 (s, 1H), 6.27 (s, 1H), 5.73 (s, 1H), 3.83 (s, 3H), 3.78 (s, 3H), 3.77 (s, 3H), 1.28 (d,  $J = 16.4$  Hz, 9H);  $^{13}\text{C}$  NMR (151 MHz,  $\text{CDCl}_3$ )  $\delta$  168.1, 164.8, 164.6 (d,  $J_{\text{C-P}} = 15.5$  Hz), 160.8, 153.3 ( $J_{\text{C-P}} = 4.4$  Hz), 136.8, 105.8 (d,  $J_{\text{C-P}} = 5.2$  Hz), 104.0 (d,  $J_{\text{C-P}} = 5.4$  Hz), 102.6 (d,  $J_{\text{C-P}} = 2.4$  Hz), 102.0 (d,  $J_{\text{C-P}} = 87.5$  Hz), 92.4, 77.0 (d,  $J_{\text{C-P}} = 52.8$  Hz), 55.7, 55.5, 53.2, 33.7 (d,  $J_{\text{C-P}} = 73.8$  Hz), 24.5;  $^{31}\text{P}$  NMR (242 MHz,  $\text{CDCl}_3$ )  $\delta$  61.6; HRMS (ESI)  $[\text{M} + \text{H}]^+$   $m/z$  calcd for  $\text{C}_{19}\text{H}_{25}\text{NO}_5\text{P}$  378.1465, found 378.1469.

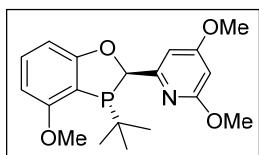

**2-((2S,3S)-3-(tert-butyl)-4-methoxy-2,3-dihydrobenzo[d][1,3]oxaphosphol-2-yl)-4,6-dimethoxyphenyl**: white solid, 78% yield;  $^1\text{H}$  NMR (500 MHz,  $\text{CDCl}_3$ )  $\delta$  7.21 (t,  $J = 8.2$  Hz, 1H), 6.64 (d,  $J = 8.2$  Hz, 1H), 6.40 (dd,  $J = 8.3$ , 3.7 Hz, 1H), 6.29 (s, 1H), 5.91 (s, 1H), 5.79 (s, 1H), 3.80 (s, 3H), 3.72 (s, 3H), 3.64 (s, 3H), 1.05 (d,  $J = 12.3$  Hz, 9H);  $^{13}\text{C}$  NMR (125 MHz,  $\text{CDCl}_3$ )  $\delta$  167.4 (d,  $J_{\text{C-P}} = 1.1$  Hz), 164.4 (d,  $J_{\text{C-P}} = 2.0$  Hz), 164.3, 161.1 ( $J_{\text{C-P}} = 11.8$  Hz), 158.6 (d,  $J_{\text{C-P}} = 14.6$  Hz), 131.3, 108.6 (d,  $J_{\text{C-P}} = 17.5$  Hz), 103.2, 102.1 (d,  $J_{\text{C-P}} = 2.0$  Hz), 99.9 (d,  $J_{\text{C-P}} = 3.8$  Hz), 90.5 (d,  $J_{\text{C-P}} = 2.4$  Hz), 84.6 (d,  $J_{\text{C-P}} = 27.0$  Hz), 54.3, 54.1, 52.4, 31.3 (d,  $J_{\text{C-P}} = 22.4$  Hz), 26.2 (d,  $J_{\text{C-P}} = 14.2$  Hz);  $^{31}\text{P}$  NMR (162 MHz,  $\text{CDCl}_3$ )  $\delta$  14.4; HRMS (ESI)  $[\text{M} + \text{H}]^+$   $m/z$  calcd for  $\text{C}_{19}\text{H}_{25}\text{NO}_4\text{P}$  362.1516, found 362.1523.

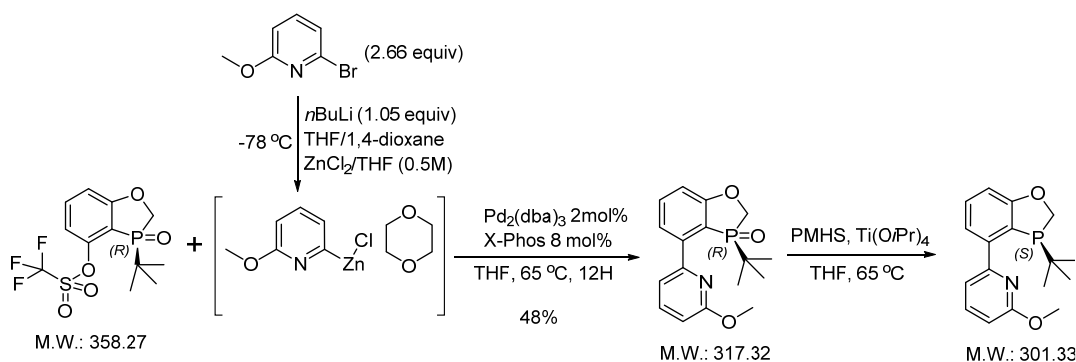

**Preparation of pyridylzinc chloride dioxane solution<sup>1</sup>**: Charged 2-bromo-6-methoxyphenyl (700 mg, 3.723 mmol, 2.66 equiv to triflate) to a 25 mL Schlenk tube under argon. Evacuated and refilled the tube with argon three times. Charged dry THF (5.2 mL) and then cooled the mixture to  $-78$  °C using dry ice/acetone bath. Charged  $n\text{-BuLi}$  (2.5M in hexanes, 1.56 mL, 3.909 mmol, 1.05 equiv to bromide) at  $-78$  °C and stirred for 15 min. Charged 0.5M  $\text{ZnCl}_2$  in THF (8.94 mL, 4.47 mmol, 1.2 equiv to bromide) to above mixture and then warmed up to RT and stirred for additional 1h. Charged 1,4-dioxane (0.76 g, 8.57 mmol, 2.3 equiv to bromide) to above mixture and stirred for additional 15 min at RT.

**(R)-3-(tert-butyl)-4-(6-methoxypyridin-2-yl)-2H-benzo[d][1,3]oxaphosphole 3-oxide:**

Charged Pd<sub>2</sub>(dba)<sub>3</sub> (2 mol%), X-Phos (8 mol%) to a Schlenk tube flushed with Ar line. Evacuated and refilled the tube with argon three times. Charged dry THF to the tube followed by pyridylzinc chloride dioxane solution to above solution at RT. Charged triflate (0.5 g, 1.4 mmol) in dry THF (4.5 mL) solution to above mixture and stirred at 65 °C for 15 h. The reaction mixture was quenched with 3 mL of 1N HCl and diluted with ethyl acetate (15 mL). Extracted the aqueous layer with ethyl acetate (15 mL) and combined both organic layers. Dried the organics over sodium sulfate and filtered through a short celite pad. Collected the filtrate and concentrated to dryness to give oil. Purified the oil by column chromatography (R<sub>f</sub> = 0.25 in pure EtOAc, silica, 0-100% EtOAc in hexanes) to afford 210 mg of off-white to tan solid in 47% yield; M.P. 148-150 °C; [ $\alpha$ ]<sub>D</sub><sup>23</sup> = - 119.90° (c = 0.25, EtOH). <sup>1</sup>H NMR (400 MHz, CDCl<sub>3</sub>)  $\delta$  7.89 (dd, *J* = 7.2, 1.0 Hz, 1H), 7.70 (t, *J* = 8 Hz, 1H), 7.58-7.51 (m, 2H), 6.98 (ddd, *J* = 7.6, 3.2, 1.6 Hz, 1H), 6.76 (dd, *J* = 8.4, 1.0 Hz, 1H), 4.63 (dd, *J* = 13.6, 1.0 Hz, 1H), 4.50 (dd, *J* = 13.6, 10.4 Hz, 1H), 4.04 (s, 3H), 0.89 (d, *J* = 16.0 Hz, 9H); <sup>13</sup>C NMR (100 MHz, CDCl<sub>3</sub>)  $\delta$  165.8 (d, *J* = 19.0 Hz), 163.8, 154.6 (d, *J* = 2.0 Hz), 145.1 (d, *J* = 5.0 Hz), 139.3, 134.8 (d, *J* = 2.0 Hz), 123.8 (d, *J* = 8.0 Hz), 118.5, 113.8 (d, *J* = 5.0 Hz), 111.7, 110.8, 110.3, 65.4 (d, *J* = 63.0 Hz), 53.5, 34.5 (d, *J* = 70.0 Hz), 23.9; <sup>31</sup>P NMR (160 MHz, CDCl<sub>3</sub>)  $\delta$  65.26; HRMS (ESI) *m/z* [M+H]<sup>+</sup> calcd for C<sub>17</sub>H<sub>21</sub>NO<sub>3</sub>P, 318.1254, found 318.1272.

**(S)-2-(3-(tert-butyl)-2,3-dihydrobenzo[d][1,3]oxaphosphol-4-yl)-6-methoxypyridine**

Charged (R)-3-(tert-butyl)-4-(6-methoxypyridin-2-yl)-2H-benzo[d][1,3]oxaphosphole 3-oxide (100 mg, 0.315 mmol) to a Schlenk tube under Argon. Charged degassed and dry THF (2 mL) to above tube. Charged PMHS (513 mg) to above tube followed by Ti(OiPr)<sub>4</sub> (179.15 mg, 0.63mmol, 2 equiv) at RT. The mixture was stirred at 65 °C for 15 h until <sup>31</sup>P NMR showed complete conversion. Concentrated the reaction mixture via reduced pressure under argon to dryness. Cooled to 0 °C and carefully added degassed 30% NaOH solution (4 mL). Gas was generated during addition. The resulting mixture was further stirred at 60 °C for 1 h. The aqueous layer was extracted with MTBE (5 mL x 4) under argon. The MTBE solution was passed through a pad of neutral alumina/MgSO<sub>4</sub>/sand under argon and rinsed with degassed MTBE (3 mL). The MTBE layer was dried under vacuum under argon to afford 80.7 mg of thick oil in 85% yield. <sup>1</sup>H NMR (500 MHz, CDCl<sub>3</sub>)  $\delta$  7.54 (t, *J* = 7.5 Hz, 1H), 7.42 (d, *J* = 7.5 Hz, 1H), 7.29 (m, 2H), 6.87 (m, 1H), 6.6 (d, *J* = 8.0 Hz, 1H), 4.76 (dd, *J* = 12.5, 2.0 Hz, 1H), 4.55 (dd, *J* = 26.5, 12.5 Hz, 1H), 3.97 (s, 3H), 0.60 (d, *J* = 11.5 Hz, 9H); <sup>13</sup>C NMR (125 MHz, CDCl<sub>3</sub>)  $\delta$  164.3, 163.6, 156.6 (d, *J* = 2.0 Hz), 143.7 (d, *J* = 12.0 Hz), 138.9, 131.2 (d, *J* = 1.0 Hz), 121.8 (d, *J* = 20.0 Hz), 116.2 (d, *J* = 7.0 Hz), 111.3 (d, *J* = 1.0 Hz), 109.3, 69.9 (d, *J* = 27.0 Hz), 54.1 (d, *J* = 5.0 Hz), 31.8 (d, *J* = 21.0 Hz), 26.7 (d, *J* = 14.0 Hz); <sup>31</sup>P NMR (200 MHz, CDCl<sub>3</sub>)  $\delta$  -9.65; HRMS (ESI) *m/z* [M+H]<sup>+</sup>, C<sub>17</sub>H<sub>21</sub>NO<sub>2</sub>P, 302.1304, found 302.1309.

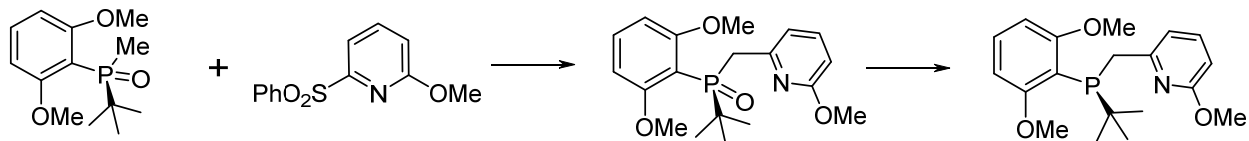

**(R)-tert-butyl(2,6-dimethoxyphenyl)((6-methoxypyridin-2-yl)methyl)phosphine oxide:** (*R*)-tert-butyl(2,6-dimethoxyphenyl)(methyl)phosphine oxide (0.50 g, 1.95 mmol), 2-methoxy-6-(phenylsulfonyl)pyridine (0.535 g, 2.15 mmol, 1.1 eq), THF (10 mL) were added to a dry flask with agitation under nitrogen and the solution was cooled to  $-70^{\circ}\text{C}$ . LDA (2 M in THF, 0.98 mL, 1.95 mmol, 1.0 eq) was added to the flask dropwise. The mixture was warmed up to  $20^{\circ}\text{C}$ . LDA (2 M in THF, 0.98 mL, 1.95 mmol, 1.0 eq) was added to the flask dropwise. After stir 1 h, the reaction is quenched with methanol (1.5 mL) at  $-45^{\circ}\text{C}$ . The solvent was removed under vacuum and ethyl acetate (30 mL) and saturated ammonium chloride aqueous solution (15 mL) were added. Layers were separated. The organic layer was dried over sodium sulfate and concentrated and purified by silica gel chromatography eluted with 25% ethanol in ethyl acetate to yield (*R*)-tert-butyl(2,6-dimethoxyphenyl)((6-methoxypyridin-2-yl)methyl)phosphine oxide (0.30 g) as a dense light yellow oil in 42% yield;  $[\alpha]_{\text{D}}^{23} = -42.2^{\circ}$  (c 0.23, EtOH).  $^1\text{H}$  NMR (500 MHz,  $\text{CDCl}_3$ ):  $\delta$  1.20 (d,  $J = 15.0$  Hz, 9H), 3.69 (t,  $J = 14.8$  Hz, 1H), 3.77 (s, 6H), 3.78 (s, 3H), 3.84 (dd,  $J = 14.8, 12.0$  Hz, 1H), 6.48 (d,  $J = 8.2$  Hz, 1H), 6.50 (d,  $J = 3.8$  Hz, 1H), 6.52 (d,  $J = 3.8$  Hz, 1H), 7.18 (d,  $J = 8.0$  Hz, 1H), 7.34 (t,  $J = 8.3$  Hz, 1H), 7.37 (t,  $J = 7.8$  Hz, 1H).  $^{13}\text{C}$  NMR (125 MHz,  $\text{CDCl}_3$ )  $\delta$  163.3, 163.1, 152.7 (d,  $J = 6.7$  Hz), 138.5 (d,  $J = 1.7$  Hz), 133.5 (d,  $J = 1.4$  Hz), 117.8 (d,  $J = 4.1$  Hz), 107.6 (d,  $J = 2.1$  Hz), 107.4 (d,  $J = 81.1$  Hz), 104.3 (d,  $J = 5.9$  Hz), 55.7, 53.1, 38.7 (d,  $J = 62.3$  Hz), 36.0 (d,  $J = 70.8$  Hz), 24.9 (d,  $J = 1.3$  Hz);  $^{31}\text{P}$  NMR (200 MHz,  $\text{CDCl}_3$ )  $\delta$  49.79; HRMS (ESI)  $m/z$   $[\text{M}+\text{H}]^+$ :  $\text{C}_{19}\text{H}_{26}\text{NO}_4\text{P}$ , 364.1681, found 364.1672.

**(S)-2-((tert-butyl(2,6-dimethoxyphenyl)phosphanyl)methyl)-6-methoxypyridine** (*R*)-tert-butyl(2,6-dimethoxyphenyl)((6-methoxypyridin-2-yl)methyl)phosphine oxide (0.50 g, 1.38 mmol), THF (5 mL), polymethyldihydrosiloxane (1.40 mL, 5.50 mmol, 4.0 eq), titanium (IV) isopropoxide (1.21 mL, 4.13 mmol, 3.0 eq) were added to a dry flask with agitation under nitrogen and heated at  $65^{\circ}\text{C}$  for 16 h. The reaction mixture is cooled to  $20^{\circ}\text{C}$ . 6 N sodium hydroxide aqueous solution (6 mL) is slowly charged to the flask. The mixture is heated up to  $65^{\circ}\text{C}$  and agitated for 1 h. The mixture is then cooled to  $20^{\circ}\text{C}$  and extracted with tert-butyl methyl ether (12 mL). The extract is filtered through a neutral alumina and magnesium sulfate pad and concentrated to yield (*S*)-2-((tert-butyl(2,6-dimethoxyphenyl)phosphanyl)methyl)-6-methoxypyridine, which solidified as white solid upon sitting, 0.25 g, 53% yield. NMR (500 MHz,  $\text{CDCl}_3$ )  $\delta$  1.13(d,  $J = 12.2$  Hz, 9H), 3.35 (dd,  $J = 14.2, 2.0$  Hz, 1H), 3.78 (s, 9H), 3.79–3.82 (m, 1H), 6.42 (d,  $J = 8.4$  Hz, 1H), 6.53 (d,  $J = 8.3, 2.0$  Hz, 2H), 6.81 (d,  $J = 8.0$  Hz, 1H), 7.28 (t,  $J = 8.3$  Hz, 1H), 7.36 (t,  $J = 7.8$  Hz, 1H).  $^{13}\text{C}$  NMR (125 MHz,  $\text{CDCl}_3$ )  $\delta$  164.0 (d,  $J = 6.9$  Hz), 163.1 (d,  $J = 0.9$  Hz), 159.4, 138.4, 131.2, 116.2 (d,  $J = 7.6$  Hz), 106.7, 103.9 (d,  $J = 1.1$  Hz), 55.4, 53.1, 31.9 (d,  $J = 13.8$  Hz), 31.4, 28.6 (d,  $J = 14.5$  Hz);  $^{31}\text{P}$  NMR (200 MHz,  $\text{CDCl}_3$ )  $\delta$  -2.10; HRMS (ESI)  $m/z$   $[\text{M} + \text{H}^+]$ ,  $\text{C}_{19}\text{H}_{26}\text{NO}_3\text{P}$ , 348.1732, found 348.1723.

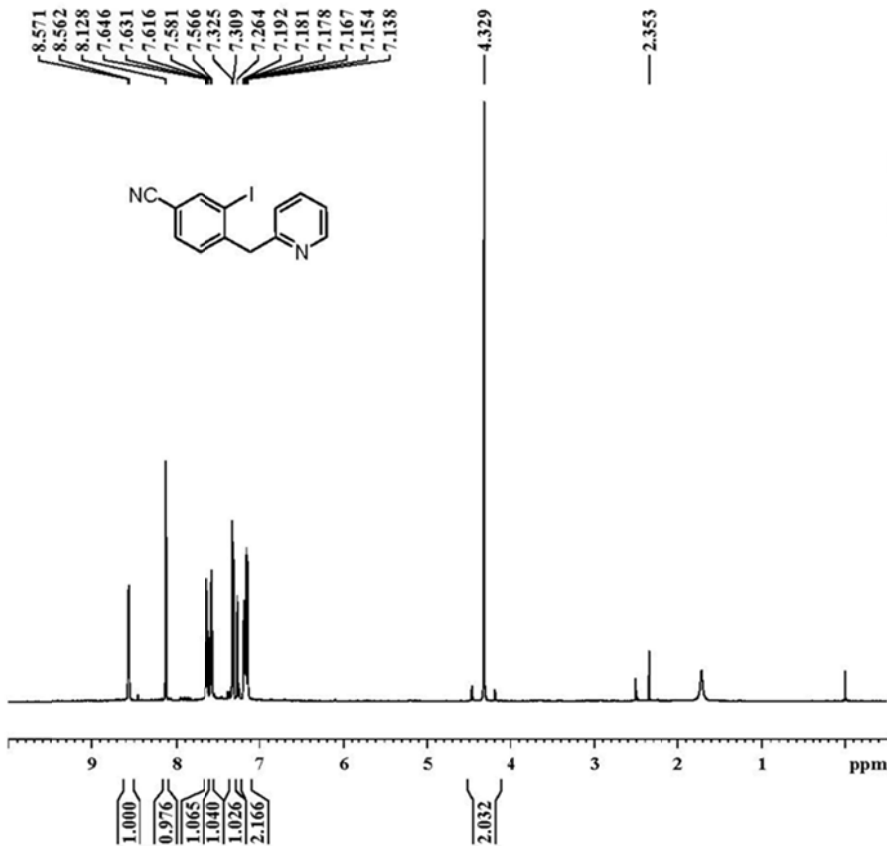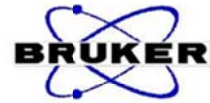

```

Current Data Parameters
NAME      103178-097
EXPNO     1
PROCNO    1

F2 - Acquisition Parameters
Date_     20140613
Time      16.39
INSTRUM   spect
PROBHD    5 mm PABBO BB-
PULPROG   zg10
TD         32768
SOLVENT   CDCl3
NS         32
DS         0
SWH        7500.000 Hz
FIDRES     0.228882 Hz
AQ         2.1845334 sec
RG         406
DM         66.667 usec
DE         6.50 usec
TE         299.0 K
D1         1.00000000 sec
TDO        1

===== CHANNEL f1 =====
NUC1       1H
P1         11.90 usec
PL1        2.10 dB
PL1W       18.43091774 W
SFO1       500.1325007 MHz

F2 - Processing parameters
SI         16384
SF         500.1300110 MHz
WDW        EM
SSB        0
LB         0.30 Hz
GB         0
PC         1.00
  
```

157.948  
149.784  
148.017  
142.491  
136.729  
131.733  
130.849  
123.624  
121.853  
117.037  
112.054  
100.716  
77.255  
77.001  
76.746  
49.096

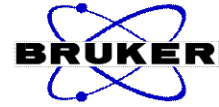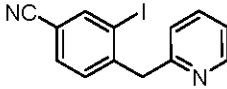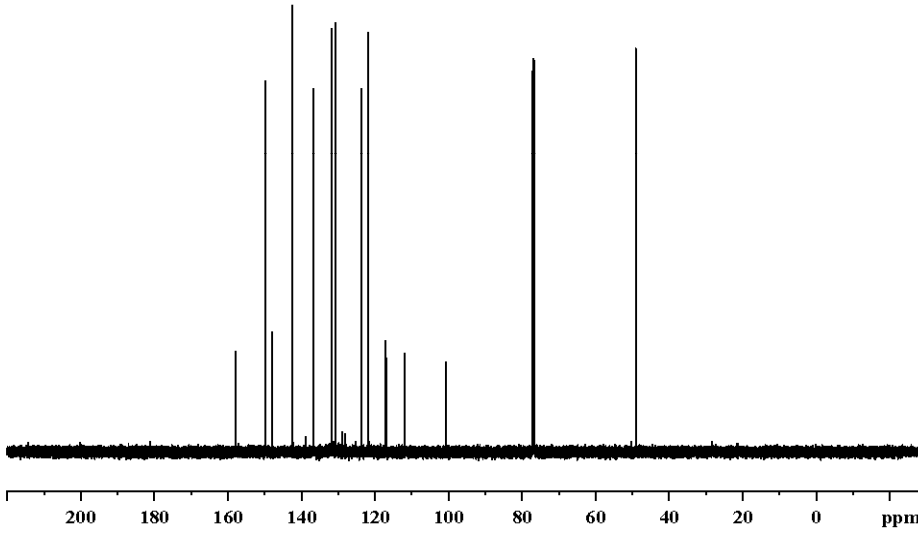

```

Current Data Parameters
NAME      103178-097
EXPNO     2
PROCNO    1

F2 - Acquisition Parameters
Date_     20140613
Time      17.03
INSTRUM   spect
PROBHD    5 mm PABBO BB-
PULPROG   zgpg
TD         262144
SOLVENT   CDCl3
NS         256
DS         0
SWH        31250.000 Hz
FIDRES     0.119209 Hz
AQ         4.1943040 sec
RG         2050
DW         16.000 usec
DE         6.50 usec
TE         299.0 K
D1         1.00000000 sec
d11        0.03000000 sec
DELTA      0.89999998 sec
TD0        1
SFO1       125.7698617 MHz
NUC1       13C
P1         10.64 usec
PLW1       -1.00000000 W
SFO2       500.1325007 MHz
NUC2       1H
CPDPRG2    waltz16
PCPD2      80.00 usec
PLW2       -1.00000000 W
PLW12      -1.00000000 W
PLW13      -1.00000000 W

F2 - Processing parameters
SI         131072
SF         125.7577941 MHz
WDW        EM
SSB        0
LB         0.30 Hz
GB         0
PC         1.40

```



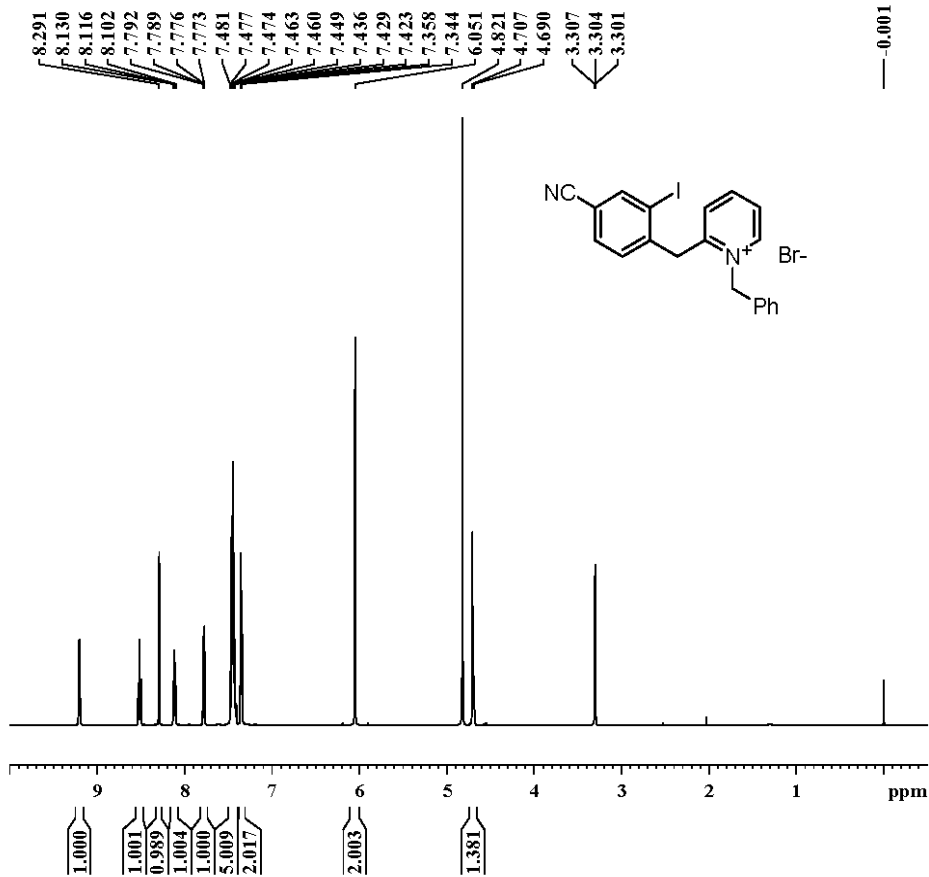

-0.001

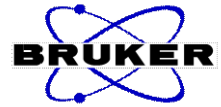

```

Current Data Parameters
NAME      103790-066
EXPNO     1
PROCNO    1

F2 - Acquisition Parameters
Date_     20160404
Time      17.02
INSTRUM   spect
PROBHD    5 mm PABBO BB-
PULPROG   zg10
TD         32768
SOLVENT   MeOD
NS         32
DS         0
SWH        7500.000 Hz
FIDRES     0.228882 Hz
AQ         2.1845334 sec
RG         362
DW         66.667 usec
DE         6.50 usec
TE         299.0 K
D1         1.00000000 sec
TDO        1

===== CHANNEL f1 =====
SF01      500.1325007 MHz
NUC1       1H
P1         11.75 usec
PLW1      18.39999962 W

F2 - Processing parameters
SI         16384
SF         500.1300123 MHz
WDW        EM
SSB        0
LB         0.30 Hz
GB         0
PC         1.00
  
```

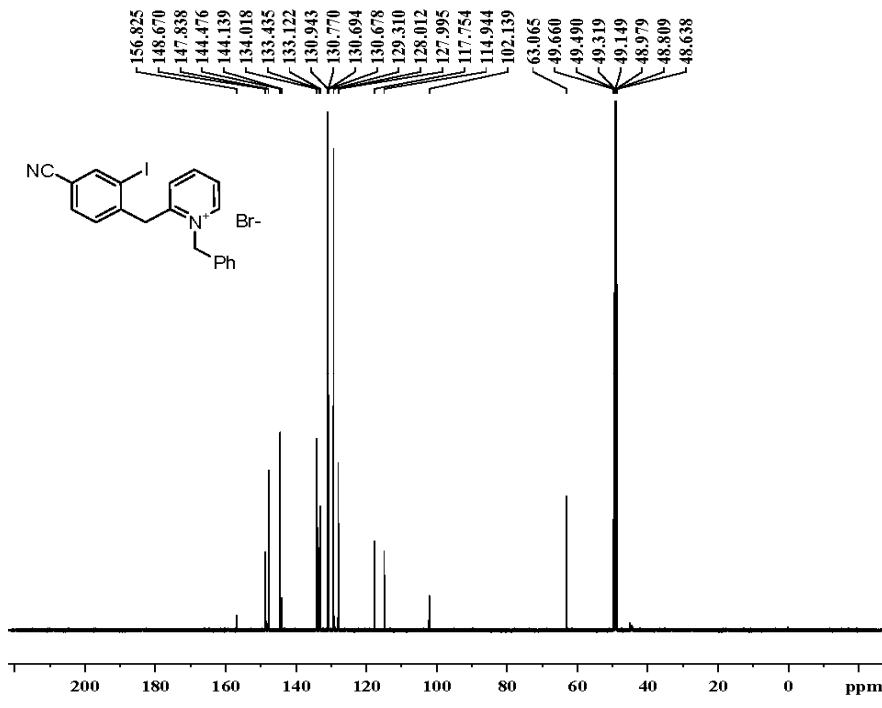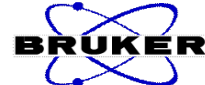

```

Current Data Parameters
NAME      103790-066
EXPNO    2
PROCNO   1

F2 - Acquisition Parameters
Date_    20160404
Time     19.23
INSTRUM  spect
PROBHD   5 mm FABBO BB-
PULPROG  zgpg
TD        262144
SOLVENT  MeOD
NS        1600
DS         0
SWH       31250.000 Hz
FIDRES    0.119209 Hz
AQ         4.1943040 sec
RG         2050
DW         16.000 usec
DE         6.50 usec
TE         299.0 K
D1         1.0000000 sec
D11        0.0300000 sec
TD0        1

===== CHANNEL f1 =====
SFO1      125.7698617 MHz
NUC1       13C
P1         9.75 usec
PLW1      126.0000000 W

===== CHANNEL f2 =====
SFO2      500.1325007 MHz
NUC2       1H
CPDPRG2   waltz16
PCPD2     80.00 usec
PLW2      18.39999962 W
PLW12     0.41056001 W
PLW13     0.20651001 W

F2 - Processing parameters
SI         131072
SF         125.7575966 MHz
WDW        EM
SSB        0
LB         0.30 Hz
GB         0
PC         1.40
  
```

Sample in CD3OH

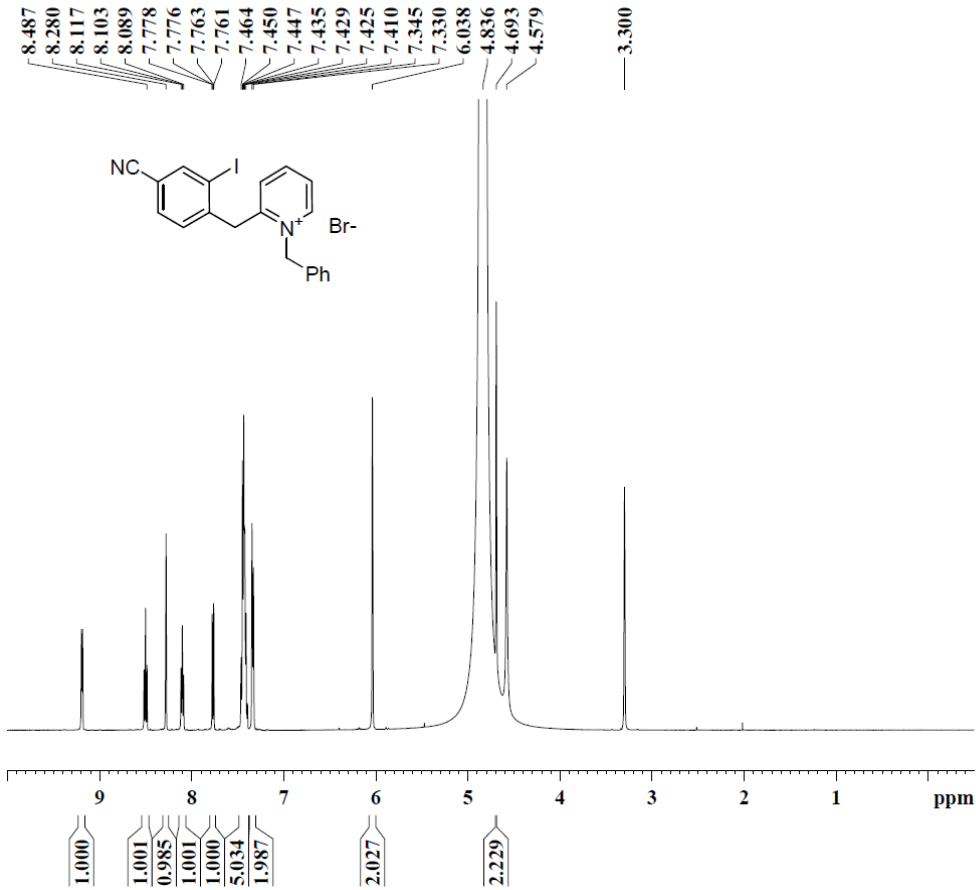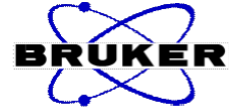

Current Data Parameters  
NAME xzel-00025  
EXPNO 1  
PROCNO 1

F2 - Acquisition Parameters  
Date\_ 20161024  
Time\_ 17.11  
INSTRUM spect  
PROBHD 5 mm PABBO BB/  
PULPROG zg10  
TD 32768  
SOLVENT MeOD  
NS 256  
DS 0  
SWH 10000.000 Hz  
FIDRES 0.305176 Hz  
AQ 1.6384000 sec  
RG 36  
DW 50.000 usec  
DE 6.50 usec  
TE 299.0 K  
D1 1.00000000 sec  
TD0 1

===== CHANNEL f1 =====  
SFO1 500.1325007 MHz  
NUC1 1H  
P1 14.00 usec  
PLW1 18.79999924 W

F2 - Processing parameters  
SI 16384  
SF 500.1300139 MHz  
WDW EM  
SSB 0  
LB 0.30 Hz  
GB 0  
PC 1.00

Sample in CD3OH

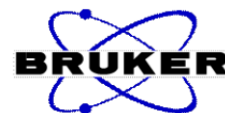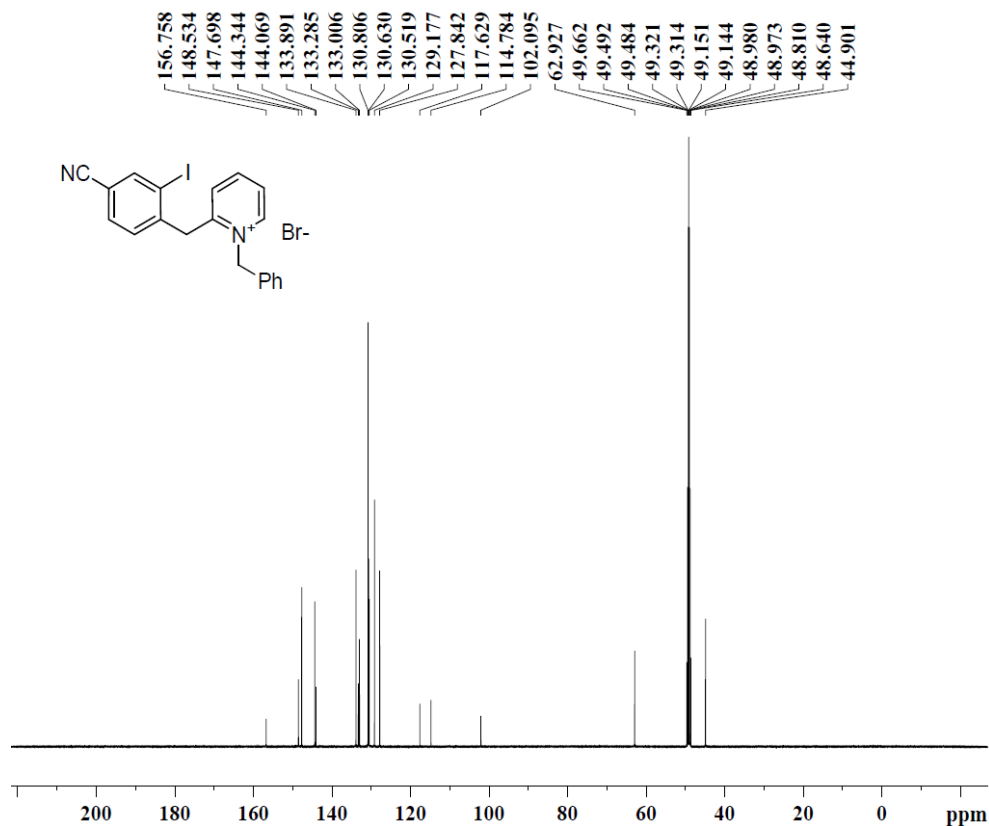

```

Current Data Parameters
NAME      xzel-00025
EXPNO     2
PROCNO    1

F2 - Acquisition Parameters
Date_     20161024
Time      21.53
INSTRUM   spect
PROBHD    5 mm PABBO BB/
PULPROG   zgpg
TD         262144
SOLVENT   MeOD
NS         3200
DS         0
SWH        31250.000 Hz
FIDRES     0.119209 Hz
AQ         4.1943040 sec
RG         2050
DW         16.000 usec
DE         6.50 usec
TE         299.0 K
D1         1.00000000 sec
D11        0.03000000 sec
TD0        1

===== CHANNEL f1 =====
SFO1      125.7698617 MHz
NUC1       13C
P1         10.00 usec
PLW1      99.50000000 W

===== CHANNEL f2 =====
SFO2      500.1325007 MHz
NUC2       1H
CPDPRG[2] waltz16
PCPD2     80.00 usec
PLW2      18.79999924 W
PLW12     0.57574999 W
PLW13     0.28960001 W

F2 - Processing parameters
SI         131072
SF         125.7576133 MHz
WDW        EM
SSB        0
LB         0.30 Hz
GB         0
    
```

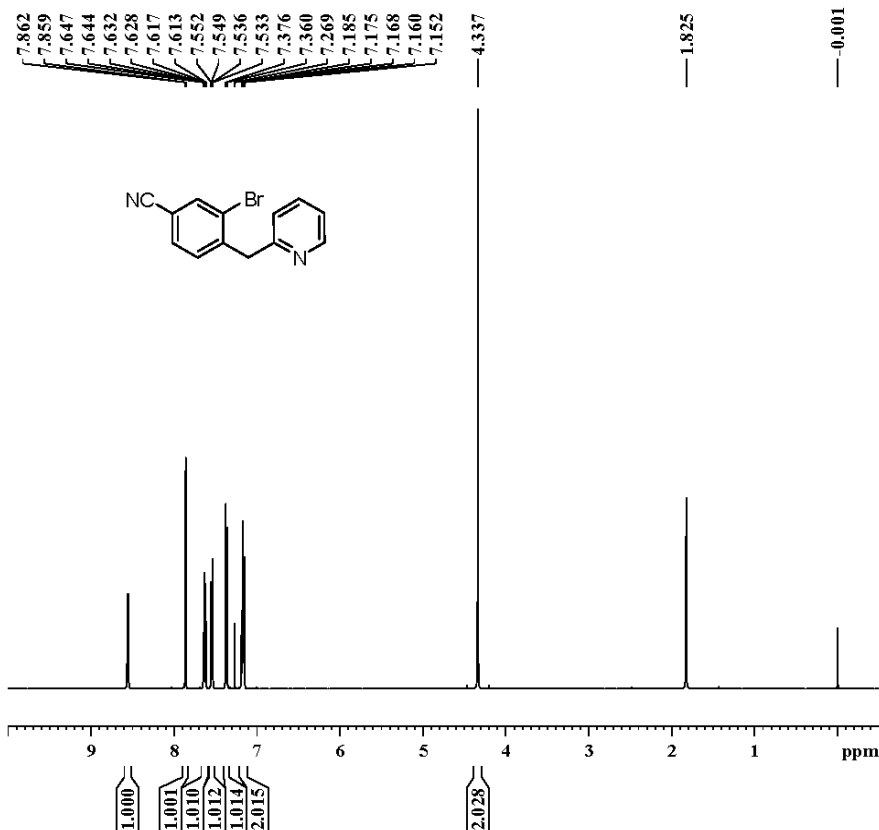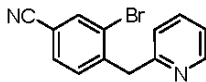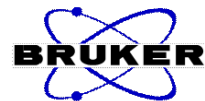

Current Data Parameters  
 NAME 103790-067  
 EXPNO 1  
 PROCNO 1

F2 - Acquisition Parameters  
 Date\_ 20160404  
 Time 19.29  
 INSTRUM spect  
 PROBHD 5 mm PABBO BB-  
 PULPROG zg10  
 TD 32768  
 SOLVENT CDCl3  
 NS 32  
 DS 0  
 SWH 7500.000 Hz  
 FIDRES 0.228882 Hz  
 AQ 2.1845334 sec  
 RG 322  
 DW 66.667 usec  
 DE 6.50 usec  
 TE 299.0 K  
 D1 1.00000000 sec  
 TDO 1

===== CHANNEL f1 =====  
 SFO1 500.1325007 MHz  
 NUC1 1H  
 P1 11.75 usec  
 PLW1 18.39999962 W

F2 - Processing parameters  
 SI 16384  
 SF 500.1300075 MHz  
 WDW EM  
 SSB 0  
 LB 0.30 Hz  
 GB 0  
 PC 1.00

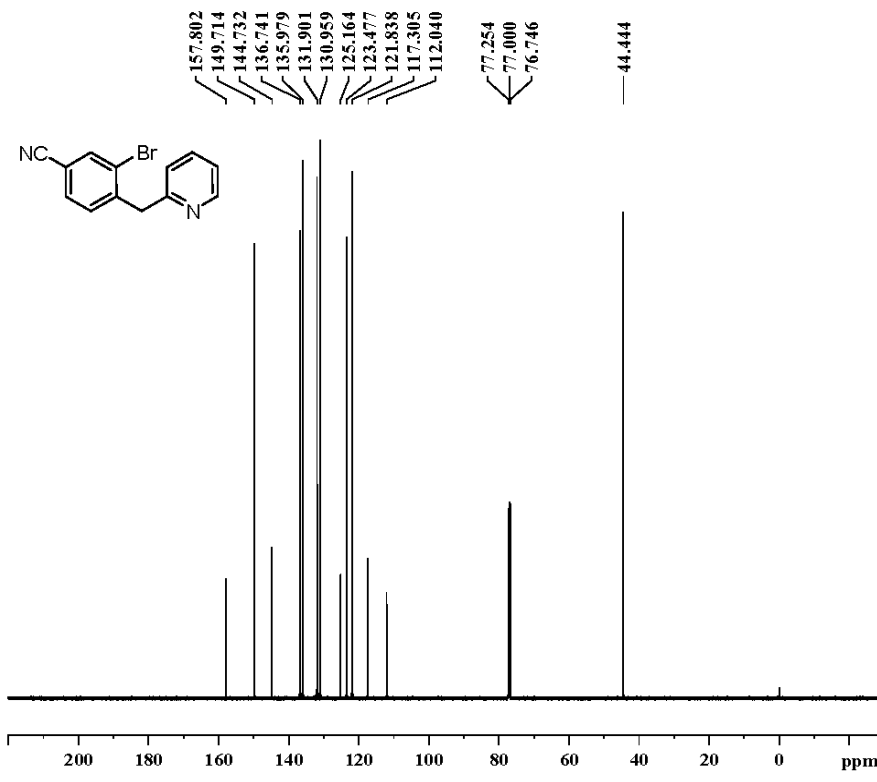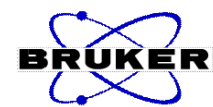

```

Current Data Parameters
NAME      103790-067
EXPNO    2
PROCNO   1

F2 - Acquisition Parameters
Date_    20160404
Time     21.50
INSTRUM  spect
PROBHD   5 mm PABBO BB-
PULPROG  zgpg
TD        262144
SOLVENT  cdcl3
NS        1600
DS         0
SWH       31250.000 Hz
FIDRES    0.119209 Hz
AQ         4.1943040 sec
RG         2050
DW         16.000 usec
DE         6.50 usec
TE         299.0 K
D1         1.00000000 sec
D11        0.03000000 sec
TDO        1

===== CHANNEL f1 =====
SFO1      125.7698617 MHz
NUC1       13C
P1         9.75 usec
PLW1      126.00000000 W

===== CHANNEL f2 =====
SFO2      500.1325007 MHz
NUC2       1H
CPDPRG[2] waltz16
PCPD2      80.00 usec
PLW2      18.39999962 W
PLW12     0.41056001 W
PLW13     0.20651001 W

F2 - Processing parameters
SI         131072
SF         125.7577954 MHz
WDW        EM
SBB        0
LB         0.30 Hz
GB         0
PC         1.40
  
```

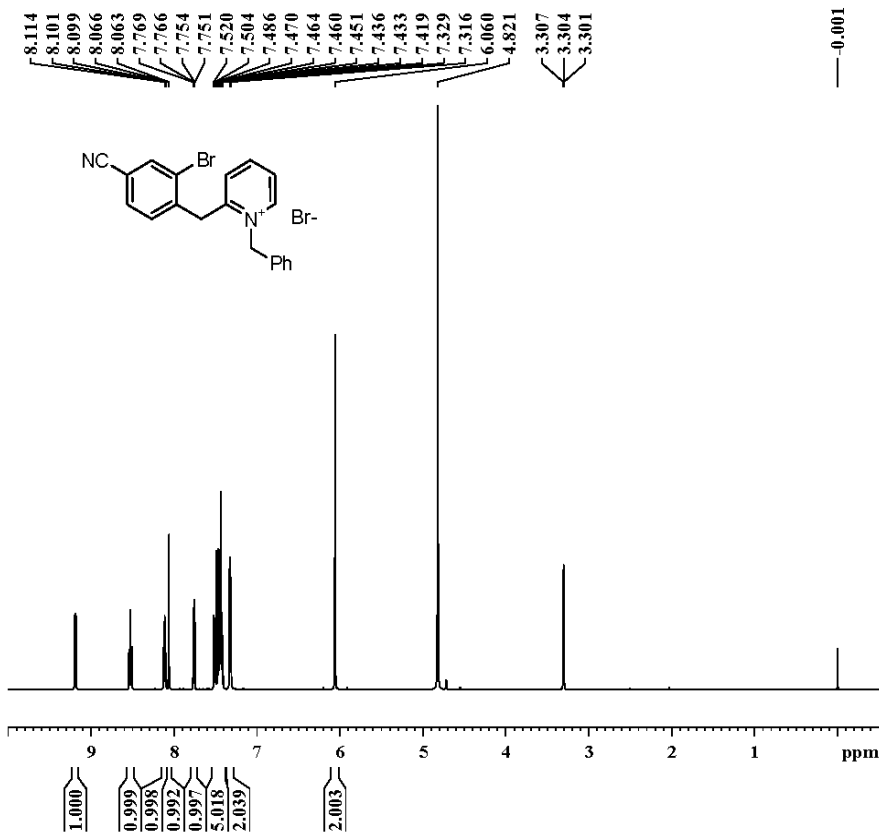

-0.001

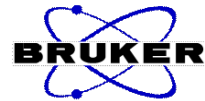

Current Data Parameters  
 NAME 103790-068  
 EXPNO 1  
 PROCNO 1

F2 - Acquisition Parameters  
 Date\_ 20160404  
 Time 21.55  
 INSTRUM spect  
 PROBHD 5 mm PABBO BB-  
 PULPROG zg10  
 TD 32768  
 SOLVENT MeOD  
 NS 32  
 DS 0  
 SWH 7500.000 Hz  
 FIDRES 0.228882 Hz  
 AQ 2.1845334 sec  
 RG 362  
 DW 66.667 usec  
 DE 6.50 usec  
 TE 299.0 K  
 D1 1.00000000 sec  
 TDO 1

===== CHANNEL f1 =====  
 SP01 500.1325007 MHz  
 NUC1 1H  
 P1 11.75 usec  
 PLW1 18.39999962 W

F2 - Processing parameters  
 SI 16384  
 SF 500.1300123 MHz  
 WDW EM  
 SSB 0  
 LB 0.30 Hz  
 GB 0  
 PC 1.00

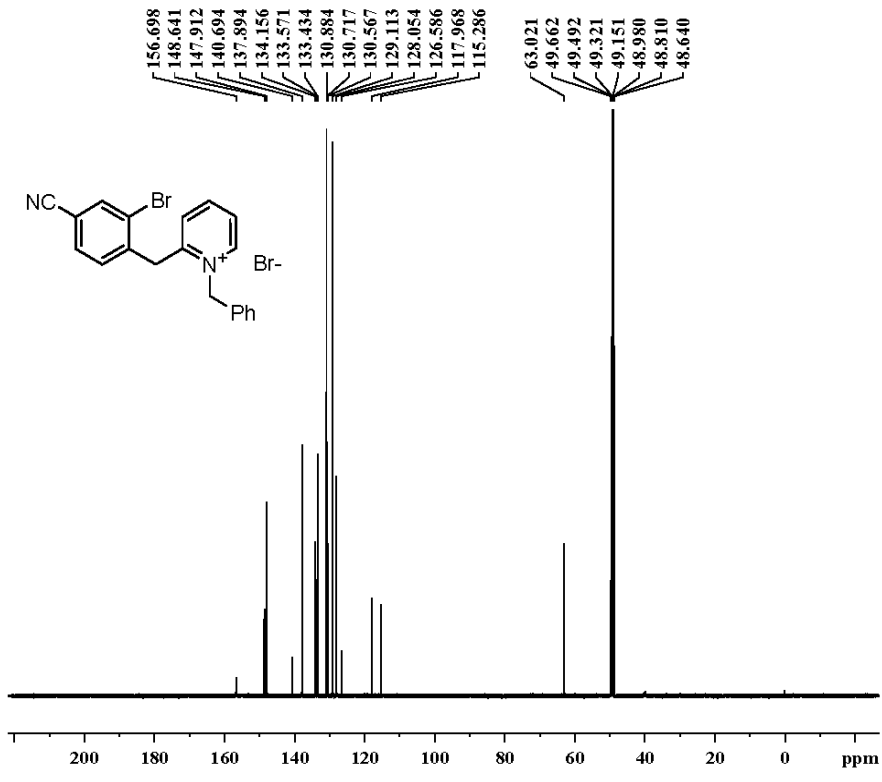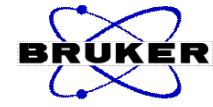

```

Current Data Parameters
NAME      103790-068
EXPNO     2
PROCNO    1

F2 - Acquisition Parameters
Date_     20160405
Time      0.16
INSTRUM   spect
PROBHD    5 mm PABBO BB-
PULPROG   zgpg
TD         262144
SOLVENT   MeOD
NS         1600
DS         0
SWH        31250.000 Hz
FIDRES     0.119209 Hz
AQ         4.1943040 sec
RG         2050
DW         16.000 usec
DE         6.50 usec
TE         299.0 K
D1         1.00000000 sec
D11        0.03000000 sec
TDO        1

===== CHANNEL f1 =====
SFO1      125.7698617 MHz
NUC1       13C
P1         9.75 usec
PLW1      126.00000000 W

===== CHANNEL f2 =====
SFO2      500.1325007 MHz
NUC2       1H
CPDPRG2   waltz16
PCPD2     80.00 usec
PLW2      18.39999962 W
PLW12     0.41056001 W
PLW13     0.20651001 W

F2 - Processing parameters
SI         131072
SF         125.7575964 MHz
WDW        EM
SBB        0
LB         0.30 Hz
GB         0
PC         1.40
  
```



Sample in CD3OH

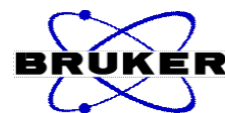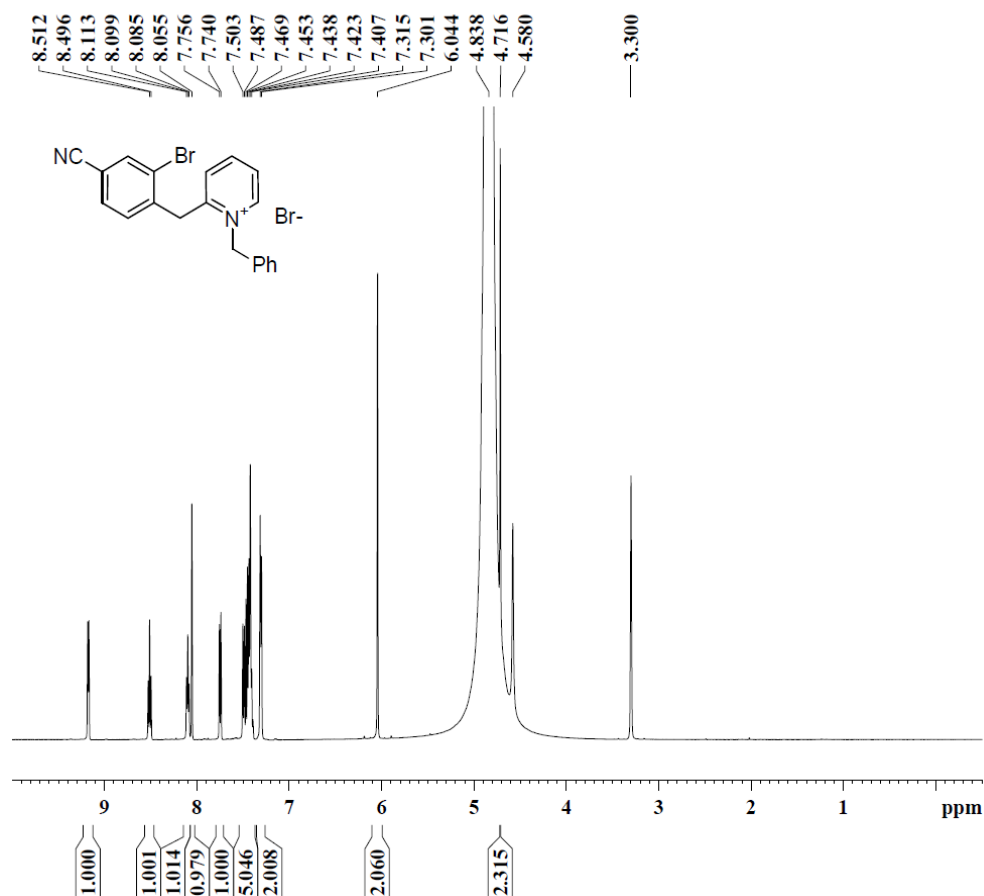

Current Data Parameters  
NAME xze1-00024  
EXPNO 1  
PROCNO 1

F2 - Acquisition Parameters  
Date\_ 20161021  
Time\_ 18.43  
INSTRUM spect  
PROBHD 5 mm PABBO BB/  
PULPROG zg10  
TD 32768  
SOLVENT MeOD  
NS 256  
DS 0  
SWH 10000.000 Hz  
FIDRES 0.305176 Hz  
AQ 1.6384000 sec  
RG 36  
DW 50.000 usec  
DE 6.50 usec  
TE 299.0 K  
D1 1.00000000 sec  
TD0 1

==== CHANNEL f1 =====  
SF01 500.1325007 MHz  
NUC1 1H  
P1 14.00 usec  
PLW1 18.79999924 W

F2 - Processing parameters  
SI 16394  
SF 500.1300135 MHz  
WDW EM  
SSB 0  
LB 0.30 Hz  
GB 0  
PC 1.00

Sample in CD3OH

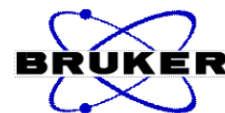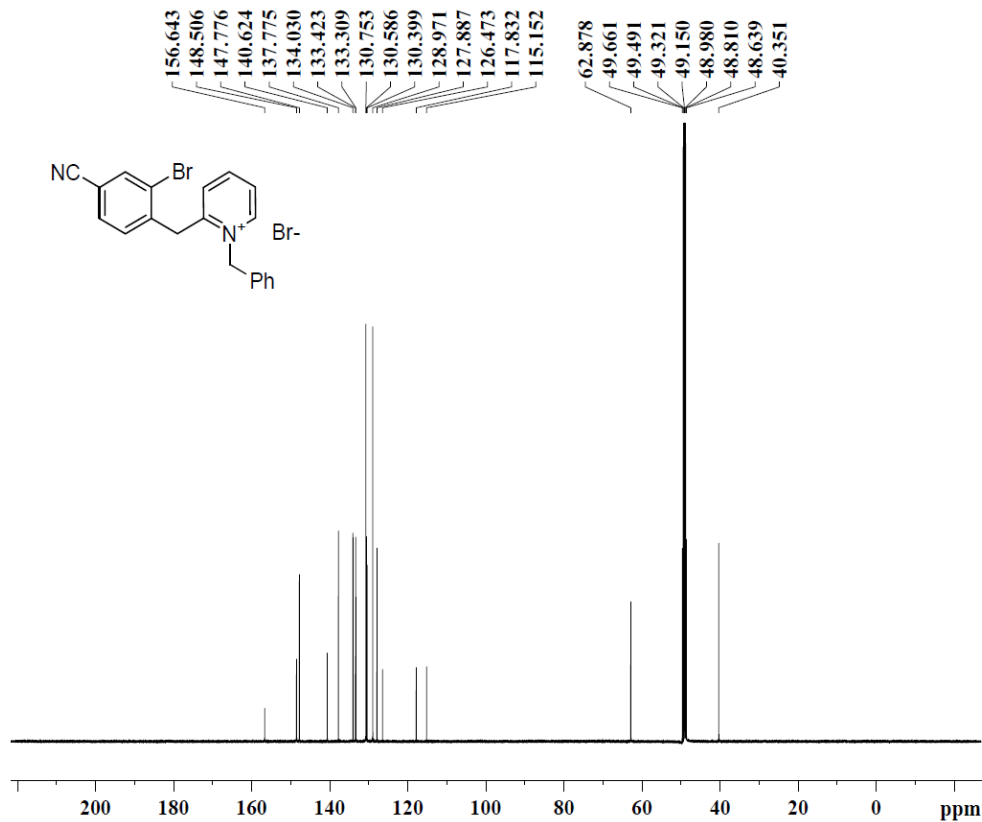

```
Current Data Parameters
NAME      xzel-00024
EXPNO     2
PROCNO    1

F2 - Acquisition Parameters
Date_     20161021
Time      23.25
INSTRUM   spect
PROBHD    5 mm PABBO BB/
PULPROG   zgpg
TD         262144
SOLVENT   MeOD
NS         3200
DS         0
SWH        31250.000 Hz
FIDRES     0.119209 Hz
AQ         4.1943040 sec
RG         2050
DW         16.000 usec
DE         6.50 usec
TE         299.0 K
D1         1.00000000 sec
D11        0.03000000 sec
TD0        1

===== CHANNEL f1 =====
SFO1      125.7698617 MHz
NUC1       13C
P1         10.00 usec
PLW1      99.50000000 W

===== CHANNEL f2 =====
SFO2      500.1325007 MHz
NUC2       1H
CPDPRG[2] waltz16
PCPD2     80.00 usec
PLW2      18.79999924 W
PLW12     0.57574999 W
PLW13     0.28960001 W

F2 - Processing parameters
SI         131072
SF         125.7576122 MHz
WDW        EM
SSB        0
LB         0.30 Hz
GB         0
```

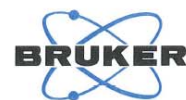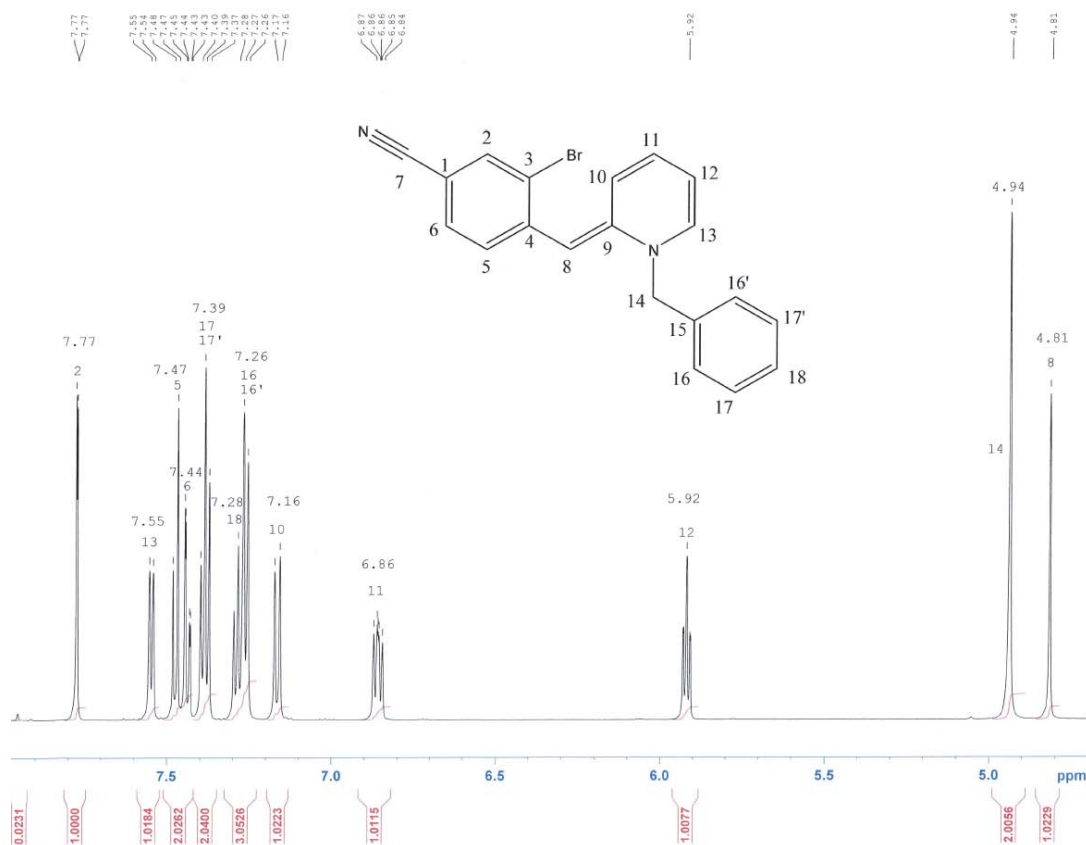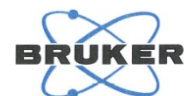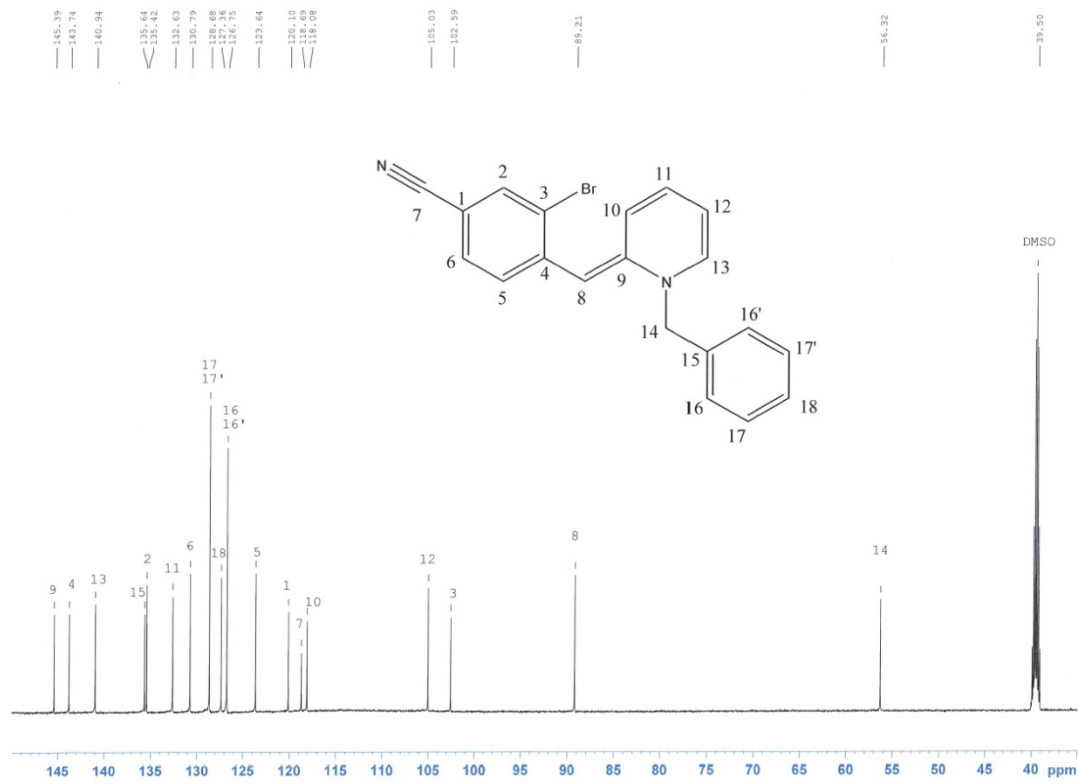

COSY spectra of free base 8

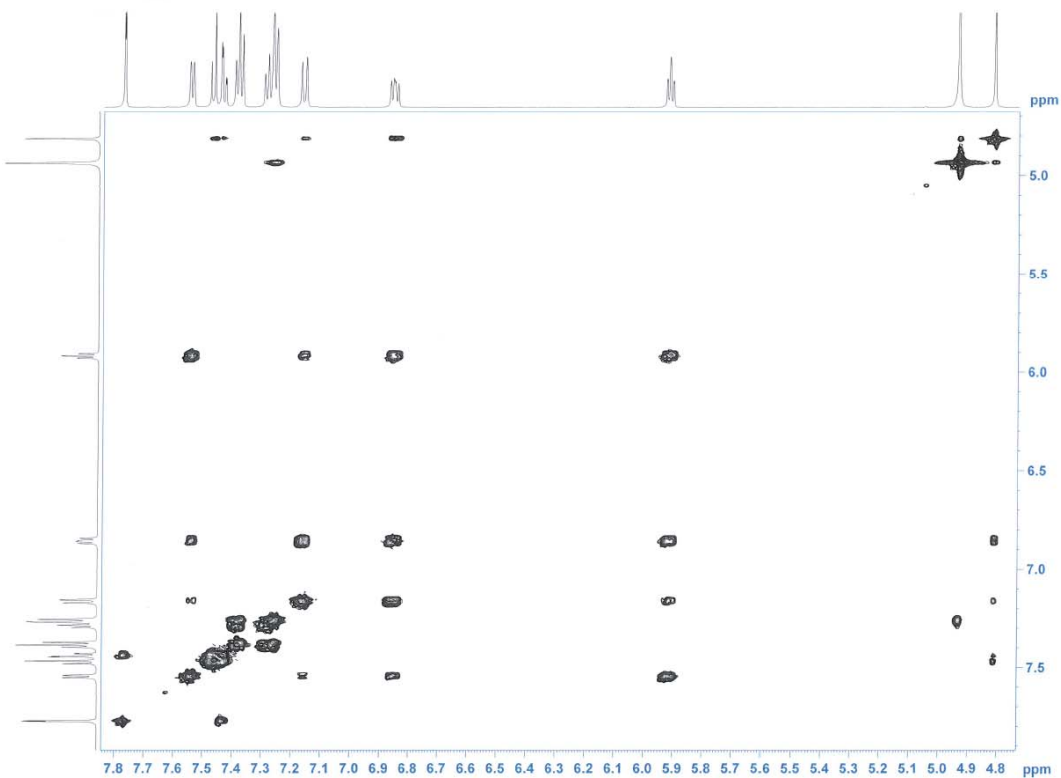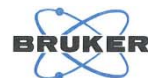

```

Current Data Parameters
NAME          h464
EXPNO         2
PROCNO        1

F2 - Acquisition Parameters
Date_         20160817
Time          11.56
INSTRUM       spect
PROBHD        5 mm PAT1 1H/
PULPROG       zgpg30
TD            2048
SOLVENT       DMSO
NS            2
DS            9
SWH           4795.396 Hz
FIDRES        2.341502 Hz
AQ            0.2133581 sec
RG            64
DW            104.267 usec
DE            6.50 usec
TE            299.9 K
D0            0.0000300 sec
D1            1.48689198 sec
D13           0.0000400 sec
D16           0.0007000 sec
INO           0.00020840 sec

===== CHANNEL f1 =====
SFO1          600.0424002 MHz
NUC1          1H
P0            9.91 usec
P1            9.91 usec
PLM1          7.0000000 W

===== GRADIENT CHANNEL =====
GPRAM[1]     SINE.100
GFX1         0 %
GFT1         0 %
GPT1         10.00 %
P16          1000.00 usec

F1 - Acquisition parameters
TD           322
SFO1         600.0424 MHz
FIDRES       9.372001 Hz
SW           7.997 ppm
FANODE       DP

F2 - Processing parameters
SI           1024
SF           600.0400033 MHz
WDW          SINE
SSB          0
LB           0 Hz
GB           0
PC           1.40

F1 - Processing parameters
SI           1024
SF           600.0400026 MHz
WDW          SINE
SSB          0
LB           0 Hz
GB           0
    
```

ROESY spectra of free base 8

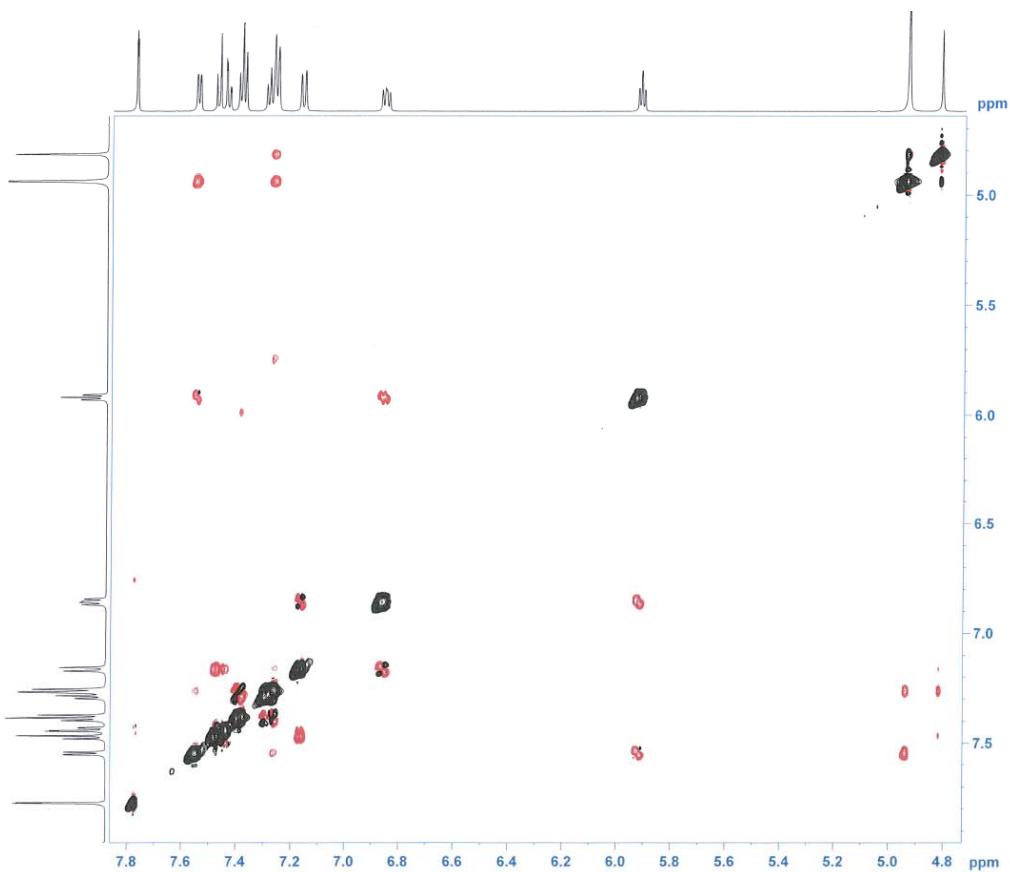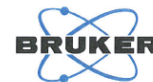

```

Current Data Parameters
NAME          h464
EXPNO         4
PROCNO        1

F2 - Acquisition Parameters
Date_         20160817
Time          15.56
INSTRUM      spect
PROBHD       5 mm PAXI 1H/
PULPROG      roesyph
TD           2048
SOLVENT      DMSO
NS            8
DS            16
SWH           4795.396 Hz
FIDRES       2.341502 Hz
AQ           0.2135381 sec
RG            80.6
DW           104.267 usec
DE            6.50 usec
TE            300.0 K
DQ           0.0005389 sec
D1           2.00000000 sec
D12          0.00002000 sec
INO          0.00023840 sec

----- CHANNEL f1 -----
SFO1         600.0428802 MHz
NUC1          1H
P1            9.91 usec
P15          300000.00 usec
PLM1         7.00000000 W
PLM11        0.08487100 W

F1 - Acquisition parameters
TD            512
SFO1         600.0429 MHz
FIDRES       9.372001 Hz
SW           7.997 ppm
PRMODE       States-TPPI

F2 - Processing parameters
SI            1024
SF           600.0400010 MHz
WDW           QSINE
SSB           2
LB            0 Hz
GB            0
PC            1.00

F1 - Processing parameters
SI            1024
MC2          States-TPPI
SF           600.0400018 MHz
WDW           QSINE
SSB           2
LB            0 Hz
GB            0
    
```

HMBS spectra of 8

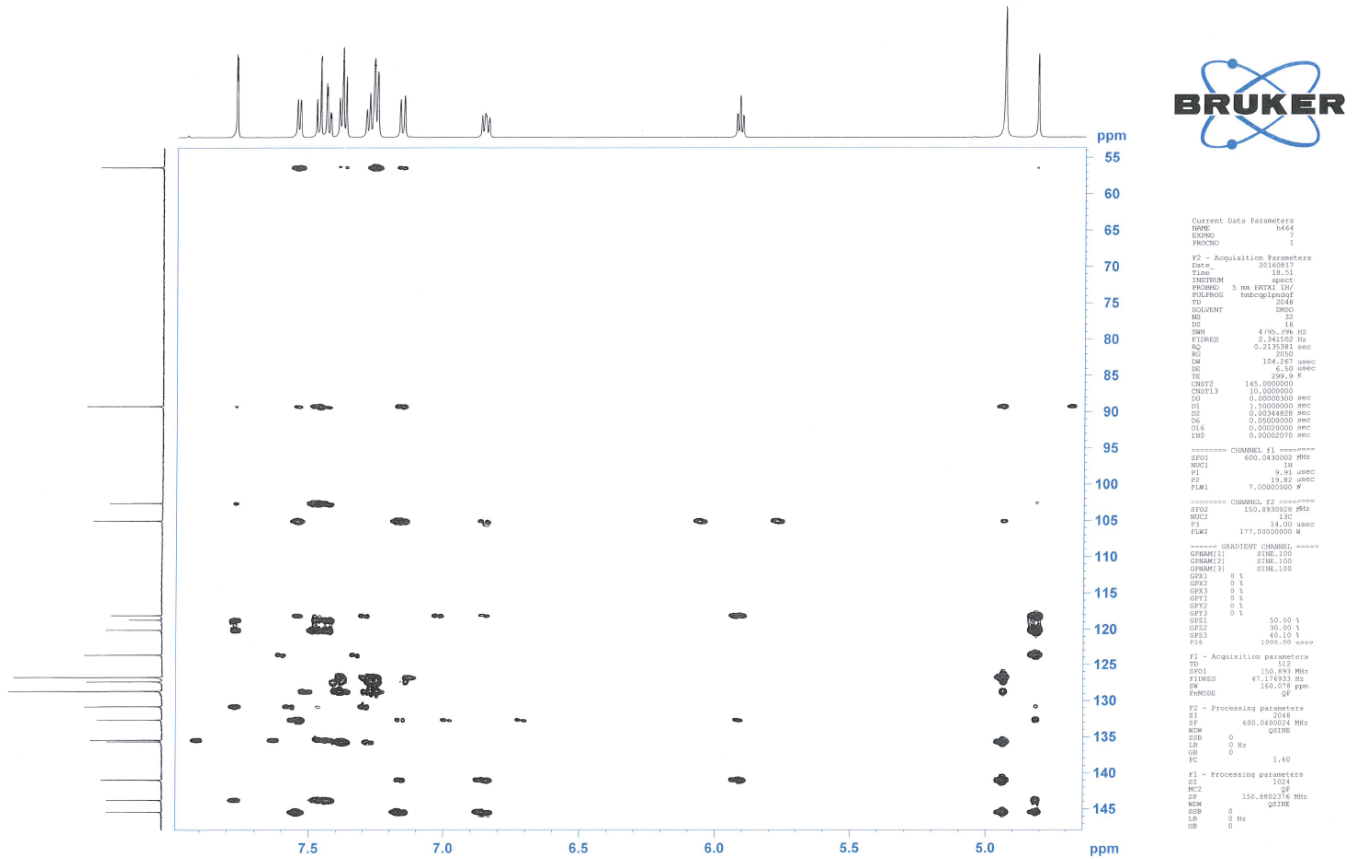

HSQC spectra of **8**

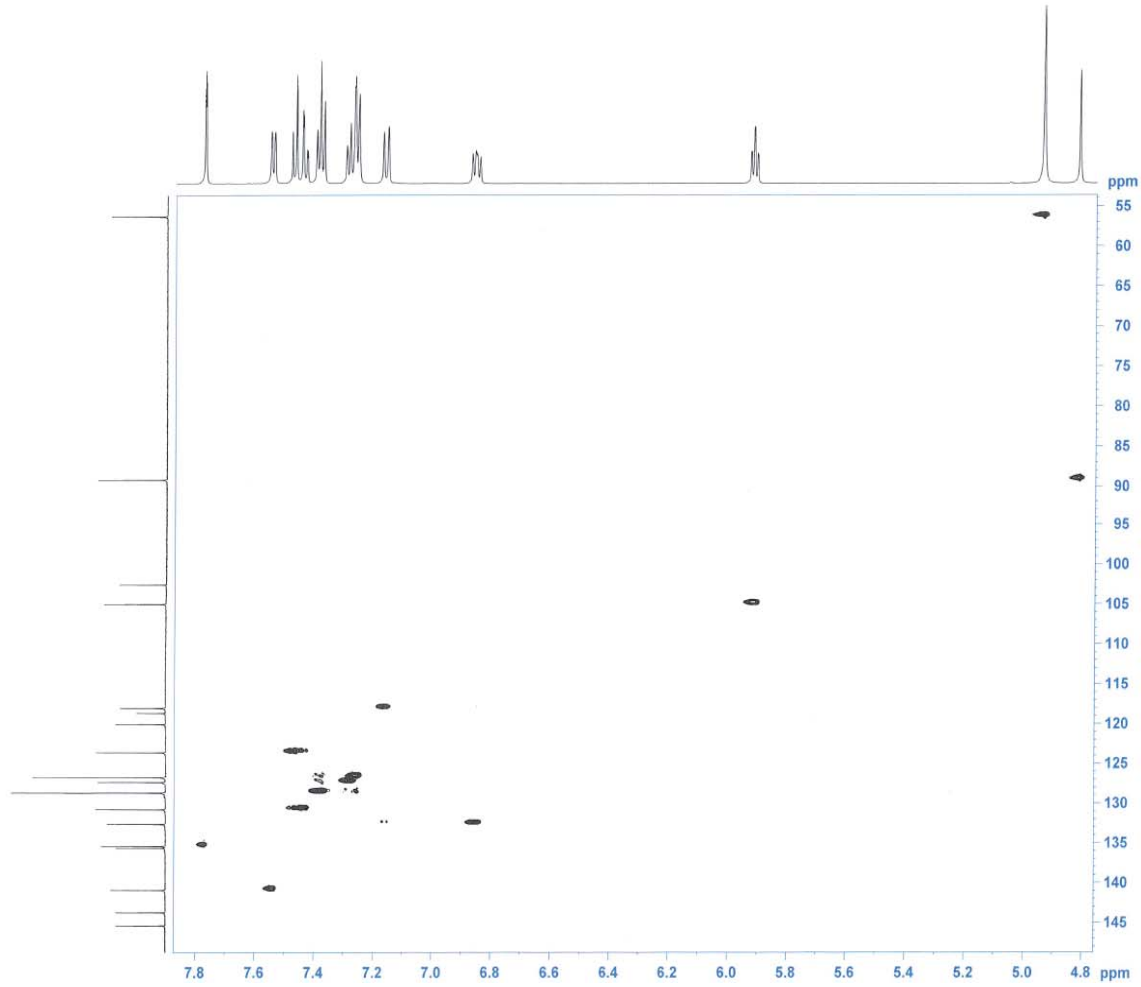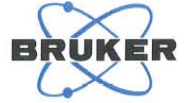

```

Current Data Parameters
NAME      0010001
EXPNO    4
PROCNO   1

F2 - Acquisition Parameters
Date_    18.11
TIME     18.21
INSTRUM  spect
PROBHD   5 mm PATE 1H/
PULPROG  zgpg30
TD        65536
SOLVENT  DMSO
NS        8
DS        4
SWH       4796.394 Hz
FIDRES    0.261800 Hz
AQ        0.215381 sec
RG         1024
CW        154.747 usec
DE        6.26 usec
TE        300.2 K
CLOCK    145.000000
DB        0.000000 sec
D1        1.500000 sec
D4        0.0012414 sec
D12       0.0300000 sec
D16       0.0000000 sec
DRI       0.0000000 sec
SFOFMR1   600.643220 MHz
----- CHANNEL f1 -----
NUC1      13C
P1        9.94 usec
P2        19.62 usec
PRF       1000.00 usec
PLW1     7.0000000 W
----- CHANNEL f2 -----
NUC2      1H
P2        14.00 usec
PRF       1000.00 usec
PLW2     0.6366998 W
----- GRADIENT CHANNEL -----
GDMAX1    2.000.100
GDMAX2    2.000.100
GDE1      0 %
GDE2      0 %
GDT1      0 %
GDT2      0 %
GPT1      80.00 %
GPT2      20.10 %
PIF       1000.00 usec

F1 - Acquisition parameters
SI        32
SF        150.9548 MHz
RG        47.2719312 Hz
SR        166.077 ppm
FUNCN     Echo-Atlas

F2 - Processing parameters
SI        1024
SF        600.040014 MHz
RG        1024
SR        130.485362 MHz
F2F1      5.3036100 ppm
SI        32
SF        150.9548 MHz
RG        47.2719312 Hz
SR        166.077 ppm
F2F1      5.3036100 ppm

```

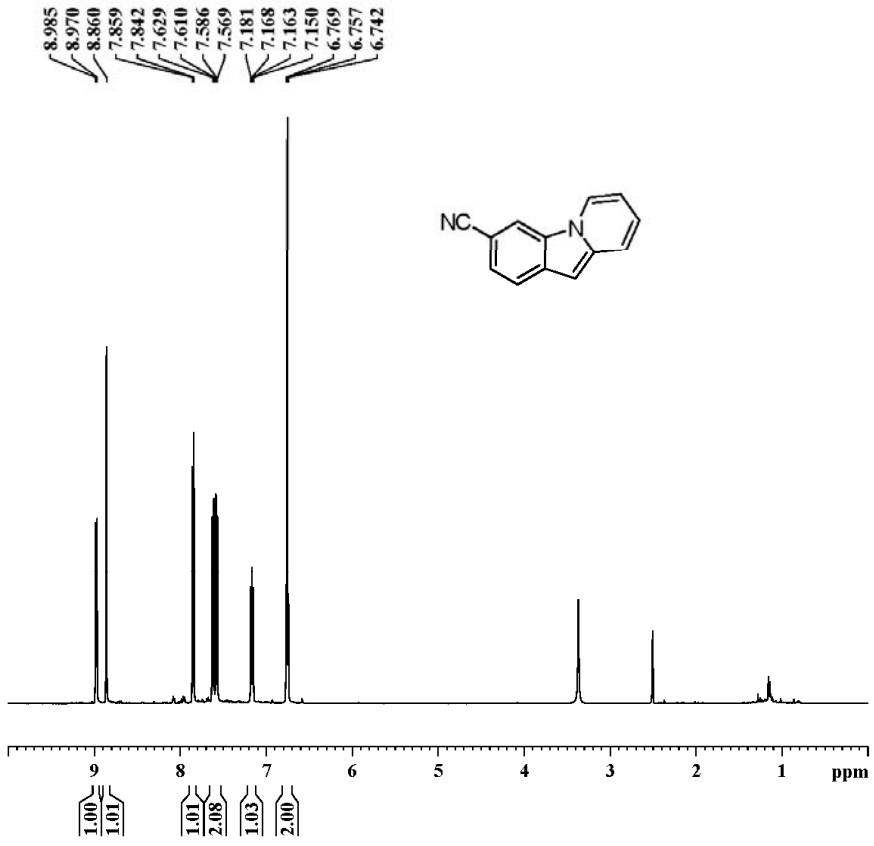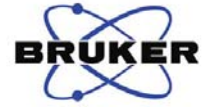

```

Current Data Parameters
NAME      103904-016
EXPNO    1
PROCNO   1

F2 - Acquisition Parameters
Date_    20160609
Time     2.37
INSTRUM  spect
PROBHD   5 mm PABBO BB-
PULPROG  zg10
TD       32768
SOLVENT  DMSO
NS       32
DS       0
SWH      7500.000 Hz
FIDRES   0.228882 Hz
AQ       2.1845334 sec
RG       144
DW       66.667 usec
DE       6.50 usec
TE       299.0 K
DL       1.00000000 sec
TDO      1

===== CHANNEL f1 =====
SF01    500.1325007 MHz
NUC1     1H
P1       11.75 usec
PLW1    18.39999962 W

F2 - Processing parameters
SI       16384
SF       500.1300000 MHz
WDW      EM
SSB      0
LB       0.30 Hz
GB       0
PC       1.00

```



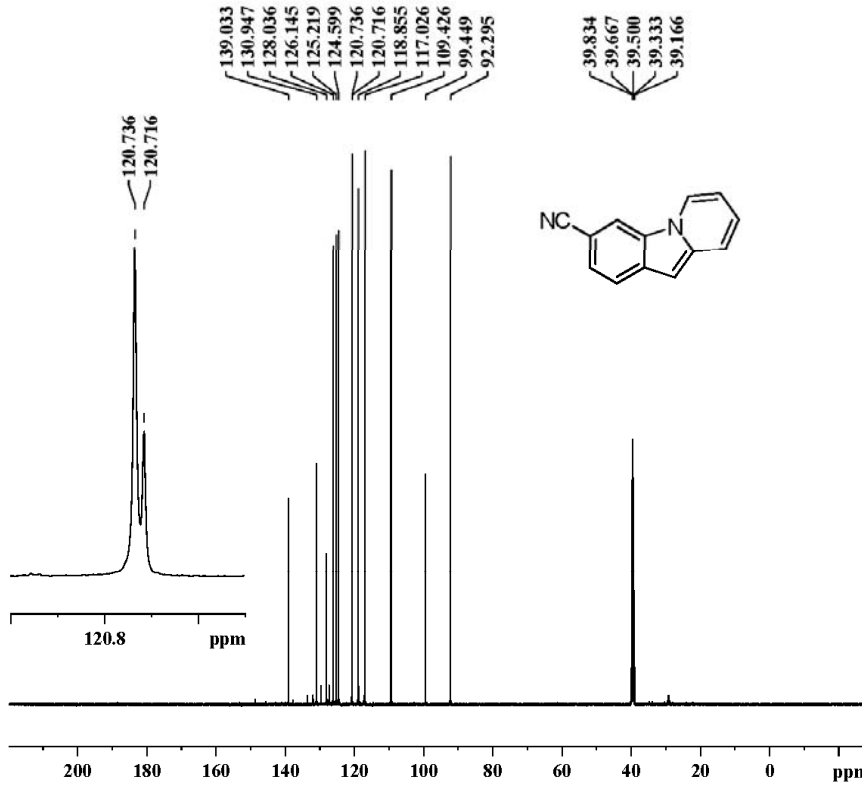

Current Data Parameters  
NAME 103904-016  
EXPNO 2  
PROCNO 1

F2 - Acquisition Parameters  
Date\_ 20160609  
Time\_ 4.58  
INSTRUM spect  
PROBHD 5 mm PABBO BB-  
PULPROG zgpg  
TD 262144  
SOLVENT DMSO  
NS 1600  
DS 0  
SWH 31250.000 Hz  
FIDRES 0.119209 Hz  
AQ 4.1943040 sec  
RG 2050  
DW 16.000 usec  
DE 6.50 usec  
TE 299.0 K  
D1 1.00000000 sec  
D11 0.03000000 sec  
TD0 1

===== CHANNEL f1 =====  
SFO1 125.7698617 MHz  
NUC1 13C  
P1 9.75 usec  
PLW1 126.00000000 W

===== CHANNEL f2 =====  
SFO2 500.1325007 MHz  
NUC2 1H  
CFDPRG2 waltz16  
PCPD2 80.00 usec  
PLW2 18.3999962 W  
PLW12 0.41056001 W  
PLW13 0.20651001 W

F2 - Processing parameters  
SI 131072  
SF 125.7578526 MHz  
WDW EM  
SSB 0  
LB 0.30 Hz  
GB 0  
PC 1.40

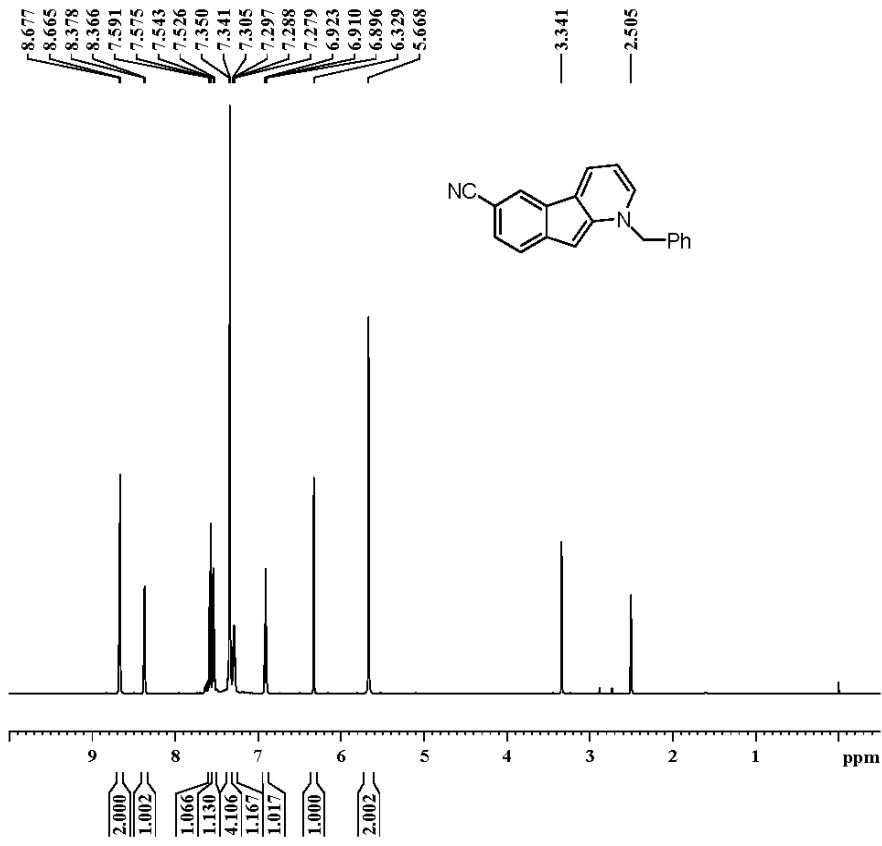

```

Current Data Parameters
NAME      102862-089-sm
EXPNO     1
PROCNO    1

F2 - Acquisition Parameters
Date_     20130418
Time      18.04
INSTRUM   spect
PROBHD    5 mm PABBO BB-
PULPROG   zg10
TD         32768
SOLVENT   DMSO
NS         32
DS         0
SWH        7500.000 Hz
FIDRES     0.228882 Hz
AQ         2.1845334 sec
RG         322
DW         66.667 usec
DE         6.50 usec
TE         299.0 K
D1         1.00000000 sec
TDO        1

===== CHANNEL f1 =====
NUC1      1H
P1        11.70 usec
PL1       2.10 dB
PL1W      18.43091774 W
SFO1      500.1325007 MHz

F2 - Processing parameters
SI         16384
SF         500.1300015 MHz
WDW        EM
SSB        0
LB         0.30 Hz
GB         0
PC         1.00
  
```

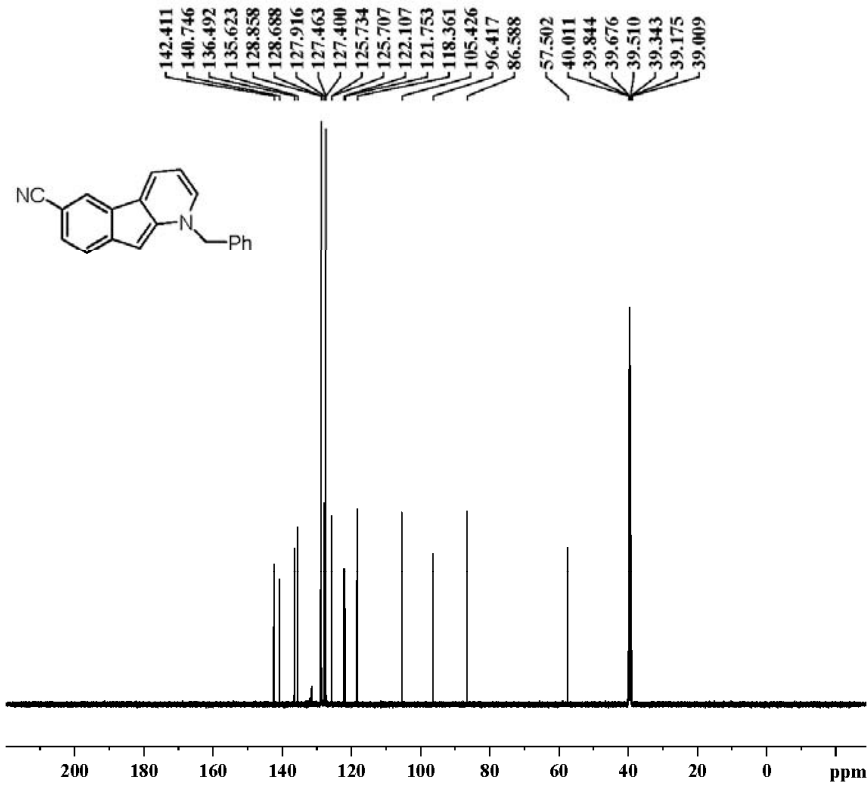

Current Data Parameters  
 NAME 102862-089-sm  
 EXPNO 2  
 PROCNO 1  
 F2 - Processing parameters  
 SI 131072  
 SF 125.7578528 MHz  
 WDW EM  
 SSB 0  
 LB 0.30 Hz  
 GB 0  
 PC 1.40

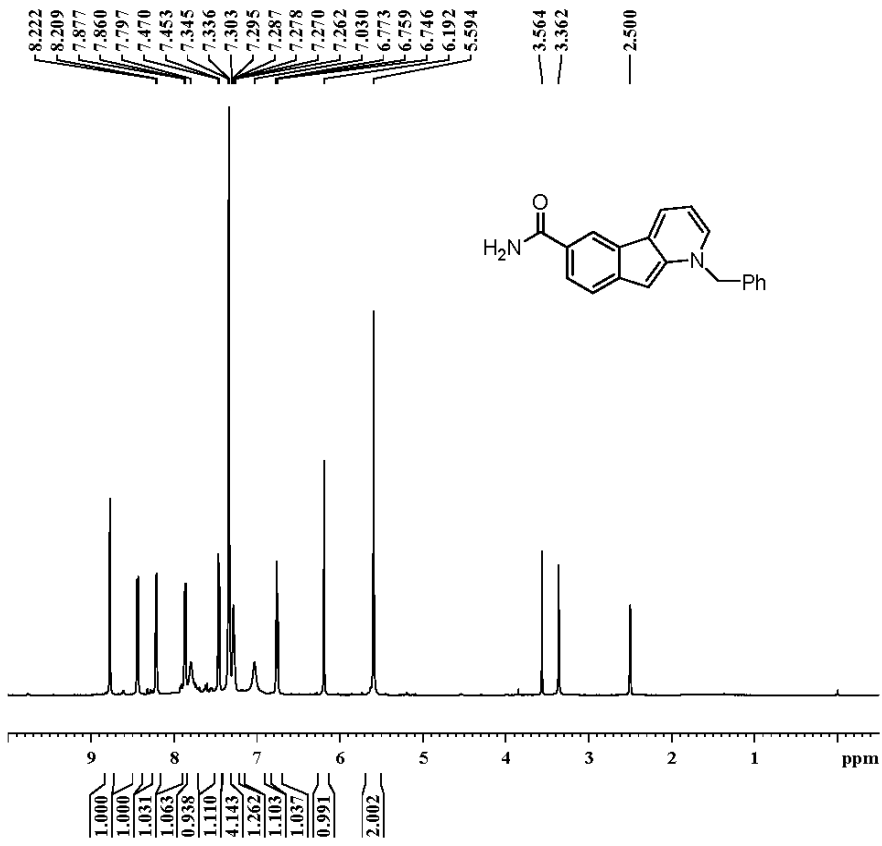

**BRUKER**

```

Current Data Parameters
NAME      103904-013
EXPNO    1
PROCNO   1

F2 - Acquisition Parameters
Date_    20160608
Time     16.59
INSTRUM  spect
PROBHD   5 mm PABBO BB-
PULPROG  zg10
TD        32768
SOLVENT  DMSO
NS        32
DS        0
SWH       7500.000 Hz
FIDRES   0.228882 Hz
AQ        2.1845334 sec
RG        228
DW        66.667 usec
DE        6.50 usec
TE        299.0 K
D1        1.00000000 sec
TDO       1

===== CHANNEL f1 =====
SFO1     500.1325007 MHz
NUC1     1H
P1       11.75 usec
PLW1     18.39999962 W

F2 - Processing parameters
SI       16384
SF       500.1300023 MHz
WDW      EM
SSB      0
LB       0.30 Hz
GB       0
PC       1.00
  
```

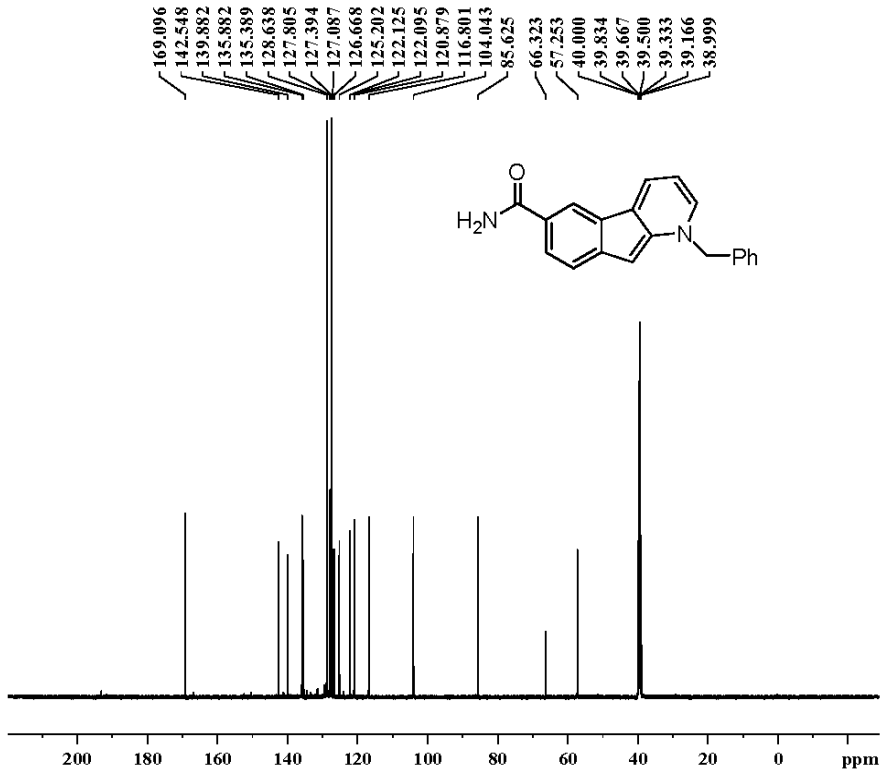

```

Current Data Parameters
NAME      103904-013
EXPNO    2
PROCNO   1

F2 - Acquisition Parameters
Date_    20160608
Time     19.21
INSTRUM  spect
PROBHD   5 mm PABBO BB-
PULPROG  zgpg
TD        262144
SOLVENT  DMSO
NS        1600
DS         0
SWH       31250.000 Hz
FIDRES    0.119209 Hz
AQ        4.1943040 sec
RG         2050
DW        16.000 usec
DE         6.50 usec
TE        299.0 K
D1        1.0000000 sec
D11       0.0300000 sec
TDO       1

===== CHANNEL f1 =====
SFO1     125.7698617 MHz
NUC1      13C
P1        9.75 usec
PLW1     126.0000000 W

===== CHANNEL f2 =====
SFO2     500.1325007 MHz
NUC2      1H
CPDPRG2  waltz16
PCPD2    80.00 usec
PLW2     18.39999962 W
PLW12    0.41056001 W
PLW13    0.20651001 W

F2 - Processing parameters
SI        131072
SF        125.7578521 MHz
WDW       EM
SBB       0
LB        0.30 Hz
GB        0
PC        1.40
  
```

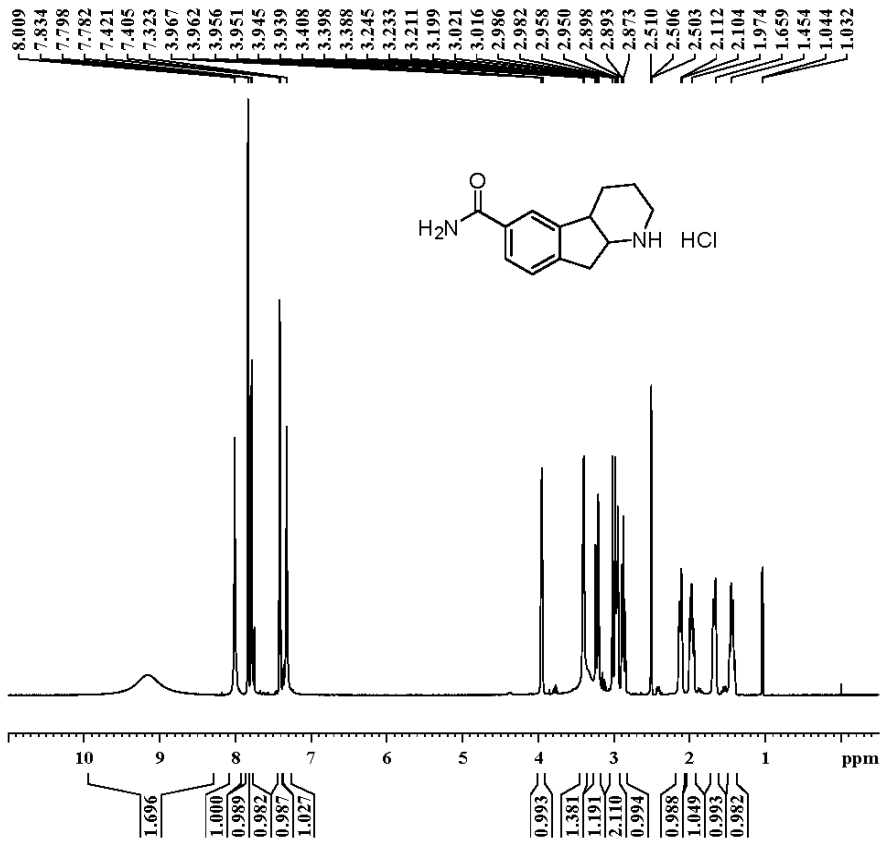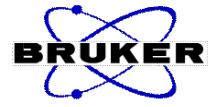

Current Data Parameters  
 NAME 103904-014  
 EXPNO 1  
 PROCNO 1

F2 - Acquisition Parameters  
 Date\_ 20160608  
 Time 19.25  
 INSTRUM spect  
 PROBHD 5 mm PABBO BB-  
 PULPROG zg10  
 TD 32768  
 SOLVENT DMSO  
 NS 32  
 DS 0  
 SWH 7500.000 Hz  
 FIDRES 0.228882 Hz  
 AQ 2.1845334 sec  
 RG 256  
 DW 66.667 usec  
 DE 6.50 usec  
 TE 299.0 K  
 D1 1.00000000 sec  
 TDO 1

===== CHANNEL f1 =====  
 SFO1 500.1325007 MHz  
 NUC1 1H  
 P1 11.75 usec  
 PLW1 18.39999962 W

F2 - Processing parameters  
 SI 16384  
 SF 500.1299997 MHz  
 WDW EM  
 SSB 0  
 LB 0.30 Hz  
 GB 0  
 PC 1.00

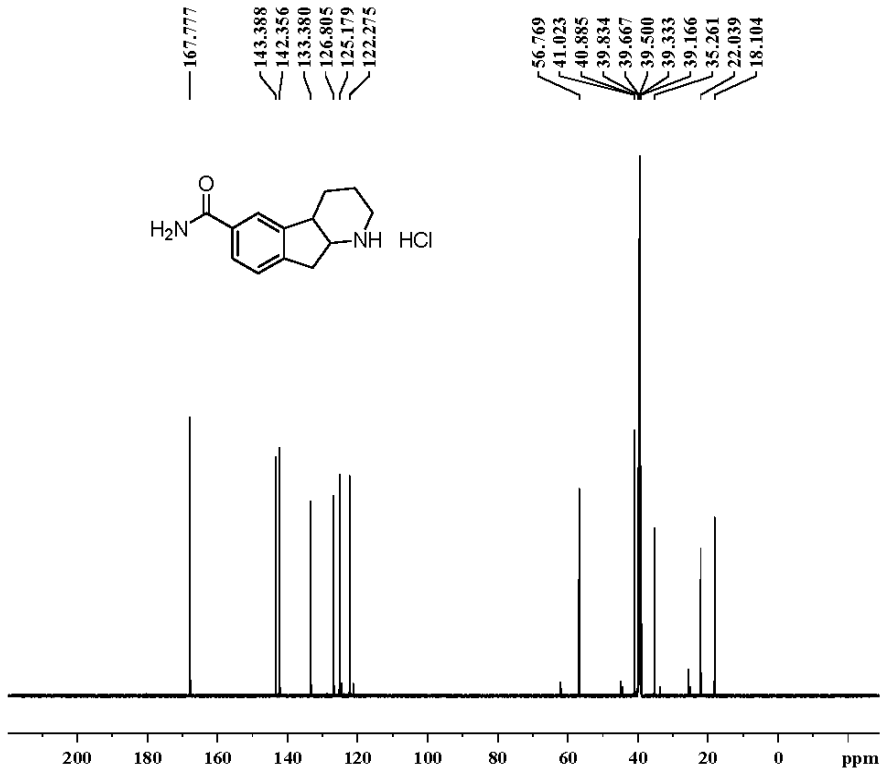

Current Data Parameters  
 NAME 103904-014  
 EXPNO 2  
 PROCNO 1

F2 - Acquisition Parameters  
 Date\_ 20160609  
 Time 0.07  
 INSTRUM spect  
 PROBHD 5 mm PABBO BB-  
 PULPROG zgpg  
 TD 262144  
 SOLVENT DMSO  
 NS 3200  
 DS 0  
 SWH 31250.000 Hz  
 FIDRES 0.119209 Hz  
 AQ 4.1943040 sec  
 RG 2050  
 DW 16.000 usec  
 DE 6.50 usec  
 TE 299.0 K  
 D1 1.00000000 sec  
 D11 0.03000000 sec  
 TDO 1

===== CHANNEL f1 =====  
 SFO1 125.7698617 MHz  
 NUC1 13C  
 P1 9.75 usec  
 PLW1 126.00000000 W

===== CHANNEL f2 =====  
 SFO2 500.1325007 MHz  
 NUC2 1H  
 CPDPRG[2] waltz16  
 PCPD2 80.00 usec  
 PLW2 18.39999962 W  
 PLW12 0.41056001 W  
 PLW13 0.20651001 W

F2 - Processing parameters  
 SI 131072  
 SF 125.7578514 MHz  
 WDW EM  
 SSB 0  
 LB 0.30 Hz  
 GB 0  
 EC 1.40

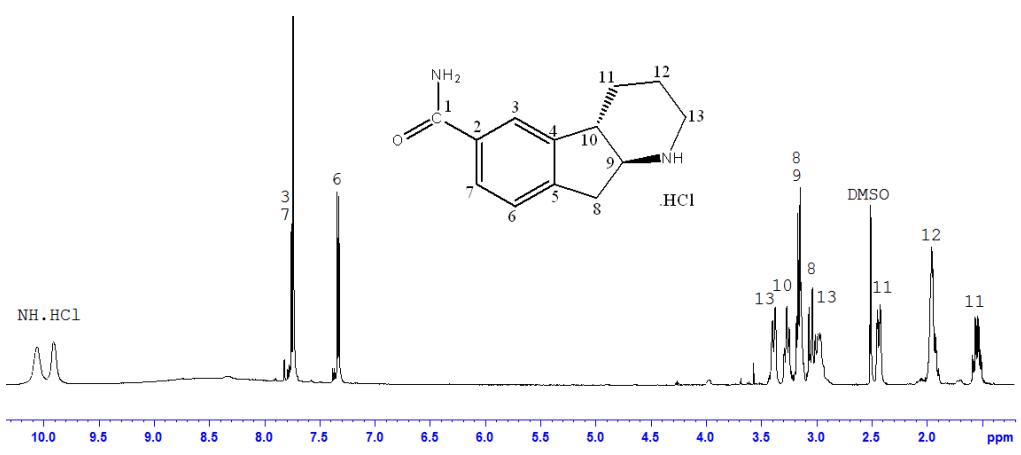

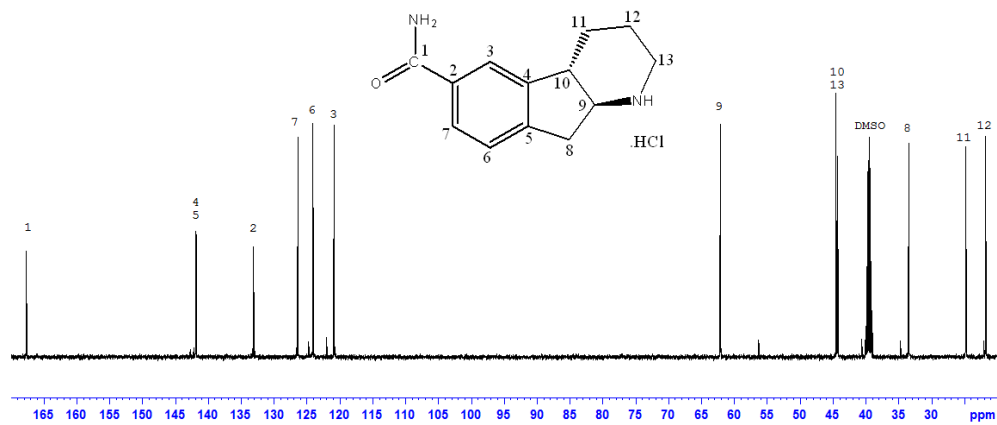



7.638  
7.576  
7.561  
7.414  
7.398  
3.532  
3.529  
3.523  
3.520  
3.514  
3.511  
3.002  
2.993  
2.918  
2.908  
2.886  
2.876  
2.666  
2.644  
2.614  
2.612  
2.503  
2.499  
2.479  
2.476  
2.457  
2.452  
2.186  
2.179  
2.158  
2.151  
1.791  
1.345  
1.337  
1.325  
1.317  
1.312  
1.171  
1.149

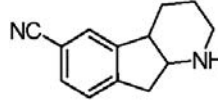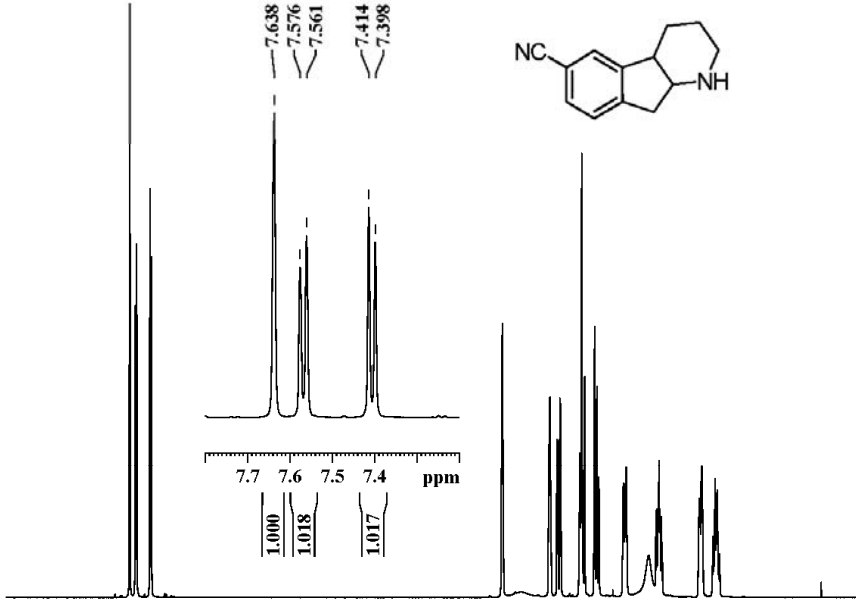

Current Data Parameters  
NAME 103904-015  
EXPNO 1  
PROCNO 1

F2 - Acquisition Parameters  
Date\_ 20160609  
Time\_ 0.11  
INSTRUM spect  
PROBHD 5 mm PABBO BB-  
PULPROG zg10  
TD 32768  
SOLVENT DMSO  
NS 32  
DS 0  
SWH 7500.000 Hz  
FIDRES 0.228882 Hz  
AQ 2.1845334 sec  
RG 144  
DW 66.667 usec  
DE 6.50 usec  
TE 299.0 K  
D1 1.00000000 sec  
TDO 1

===== CHANNEL f1 =====  
SF01 500.1325007 MHz  
NUC1 1H  
P1 11.75 usec  
PLW1 18.39999962 W

F2 - Processing parameters  
SI 16384  
SF 500.1300012 MHz  
WDW EM  
SSB 0  
LB 0.30 Hz  
GB 0  
PC 1.00

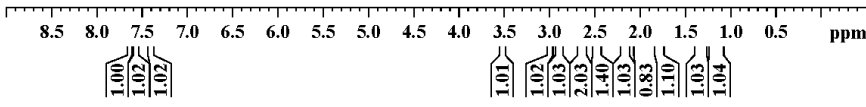

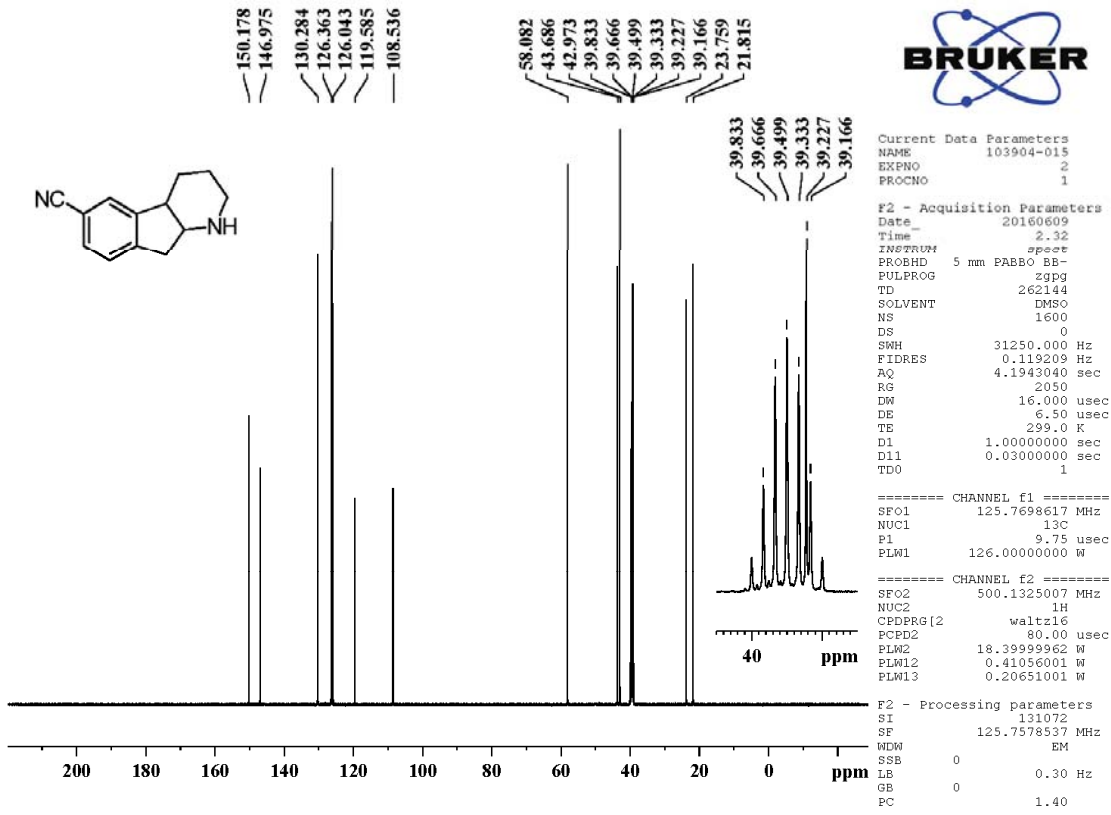

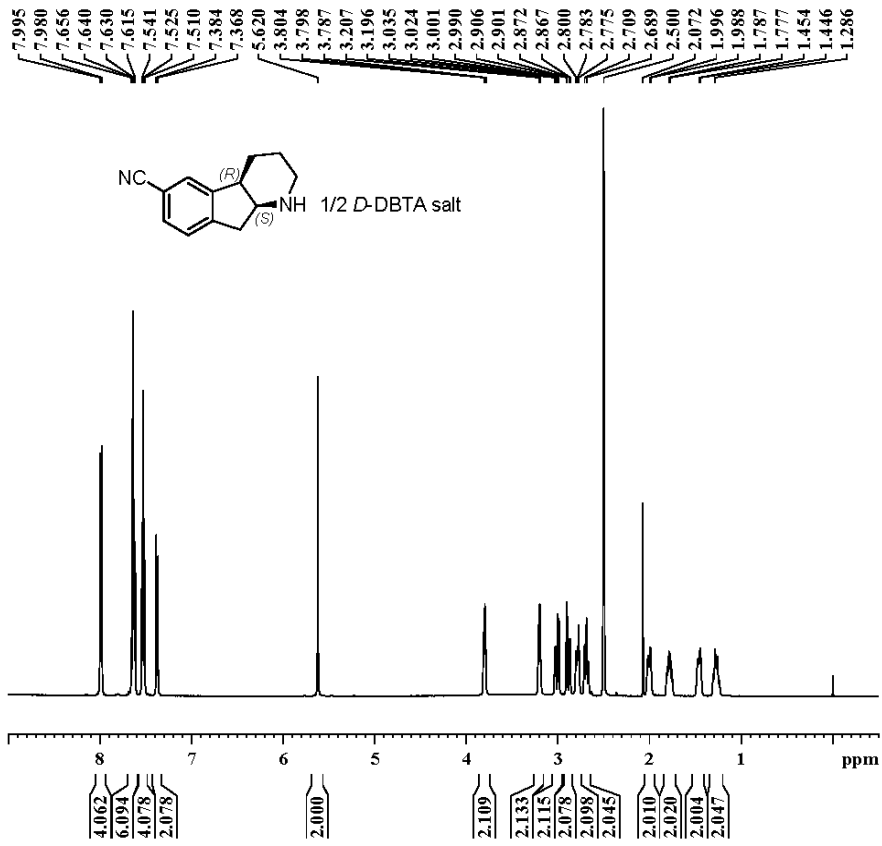

```

Current Data Parameters
NAME      103790-070
EXPNO     1
PROCNO    1

F2 - Acquisition Parameters
Date_     20160405
Time      18.58
INSTRUM   spect
PROBHD    5 mm PABBO BB-
PULPROG   zg10
TD         32768
SOLVENT   DMSO
NS         32
DS         0
SWH        15000.000 Hz
FIDRES     0.457764 Hz
AQ         1.0922667 sec
RG         362
DW         33.333 usec
DE         6.50 usec
TE         299.0 K
D1         1.00000000 sec
TDO        1

===== CHANNEL f1 =====
SFO1      500.1325007 MHz
NUC1       1H
P1         11.75 usec
PLW1      18.39999962 W

F2 - Processing parameters
SI         16384
SF         500.1300037 MHz
WDW        EM
SSB        0
LB         0.30 Hz
GB         0
PC         1.00
  
```

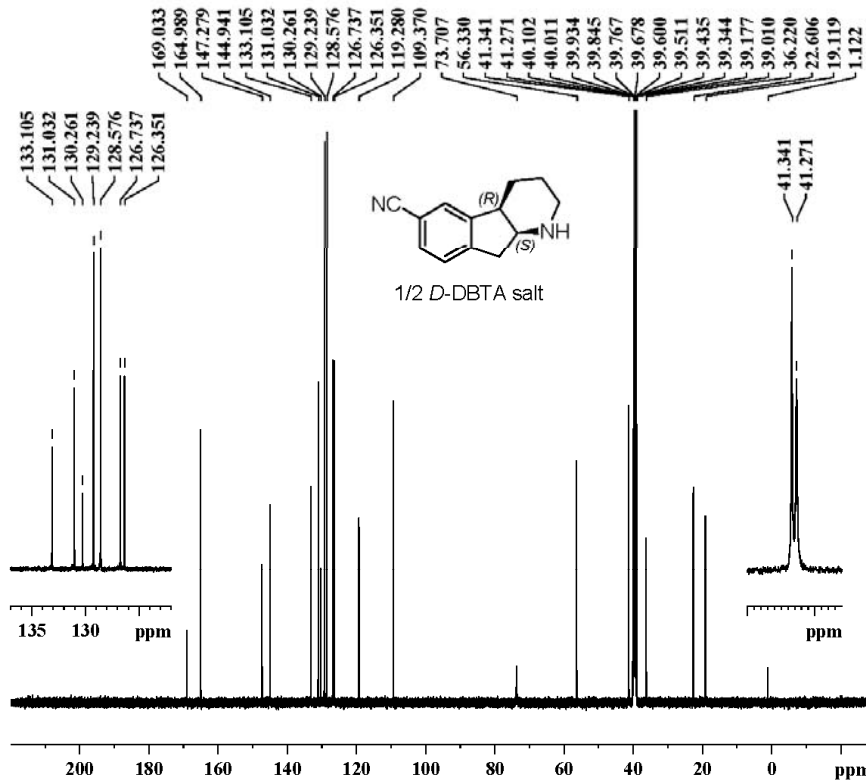

Current Data Parameters  
NAME 103790-070  
EXPNO 2  
PROCNO 1

F2 - Acquisition Parameters  
Date\_ 20160405  
Time 23.39  
INSTRUM spect  
PROBHD 5 mm PABBO BB-  
PULPROG zgpg  
TD 262144  
SOLVENT DMSO  
NS 3200  
DS 0  
SWH 31250.000 Hz  
FIDRES 0.119209 Hz  
AQ 4.1943040 sec  
RG 2050  
DM 16.000 usec  
DE 6.50 usec  
TE 299.0 K  
D1 1.00000000 sec  
D11 0.03000000 sec  
TDO 1

===== CHANNEL f1 =====  
SFO1 125.7698617 MHz  
NUC1 13C  
P1 9.75 usec  
PLW1 126.00000000 W

===== CHANNEL f2 =====  
SFO2 500.1325007 MHz  
NUC2 1H  
PCDPG2 waltz16  
PCPD2 80.00 usec  
PLW2 18.3999962 W  
PLW12 0.41056001 W  
PLW13 0.20651001 W

F2 - Processing parameters  
SI 131072  
SF 125.7578517 MHz  
WDW EM  
SSB 0  
LB 0.30 Hz  
GB 0  
PC 1.40

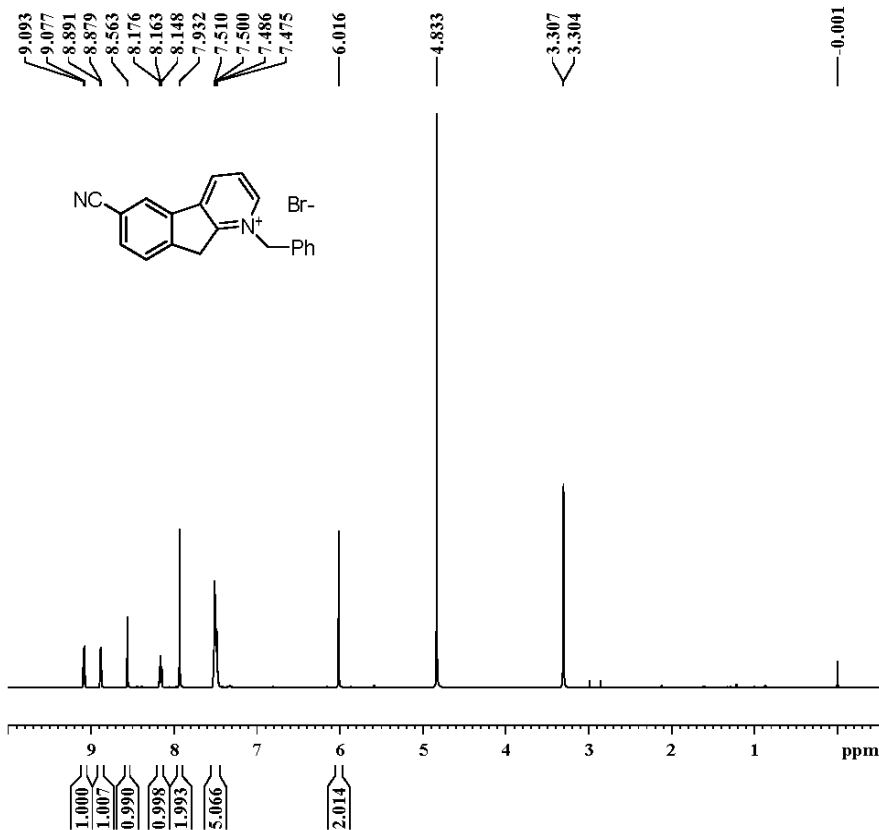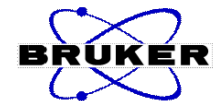

Current Data Parameters  
 NAME 102992-091  
 EXPNO 1  
 PROCNO 1

F2 - Acquisition Parameters  
 Date\_ 20131107  
 Time 16.22  
 INSTRUM spect  
 PROBHD 5 mm PABBO BB-  
 PULPROG zg10  
 TD 32768  
 SOLVENT MeOD  
 NS 32  
 DS 0  
 SWH 7500.000 Hz  
 FIDRES 0.228882 Hz  
 AQ 2.1845334 sec  
 RG 512  
 DW 66.667 usec  
 DE 6.50 usec  
 TE 299.0 K  
 D1 1.00000000 sec  
 TDO 1

===== CHANNEL f1 =====  
 NUC1 1H  
 P1 11.90 usec  
 PL1 2.10 dB  
 PLLW 18.43091774 W  
 SFO1 500.1325007 MHz

F2 - Processing parameters  
 SI 16384  
 SF 500.1300129 MHz  
 WDW EM  
 SSB 0  
 LB 0.30 Hz  
 GB 0  
 FC 1.00

Sample in CD3OH

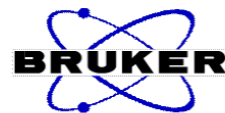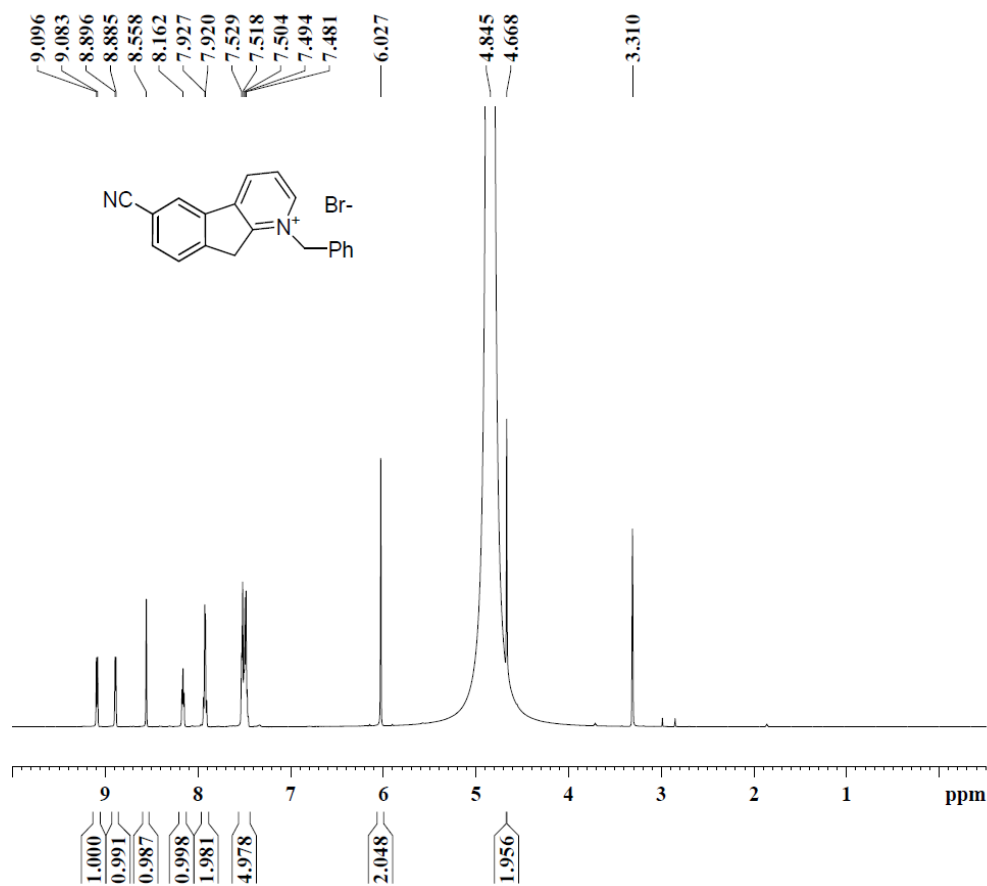

```
Current Data Parameters
NAME          h223
EXPNO         1
PROCNO        1

F2 - Acquisition Parameters
Date_         20141023
Time          15.48
INSTRUM       spect
PROBHD        5 mm PATXI 1H/
PULPROG       zg10
TD            32768
SOLVENT       MeOD
NS            256
DS            2
SWH           12335.526 Hz
FIDRES        0.376450 Hz
AQ            1.3281963 sec
RG            20.2
DW            40.533 usec
DE            6.50 usec
TE            300.8 K
D1            2.00000000 sec
TD0           1

===== CHANNEL f1 =====
NUC1           1H
P1             10.00 usec
PL1            8.41 dB
PL1W           6.99129009 W
SFO1           600.0437055 MHz

F2 - Processing parameters
SI             32768
SF             600.0400110 MHz
WDW            EM
SSB            0
LB             0.30 Hz
GB            0
PC             1.00
```

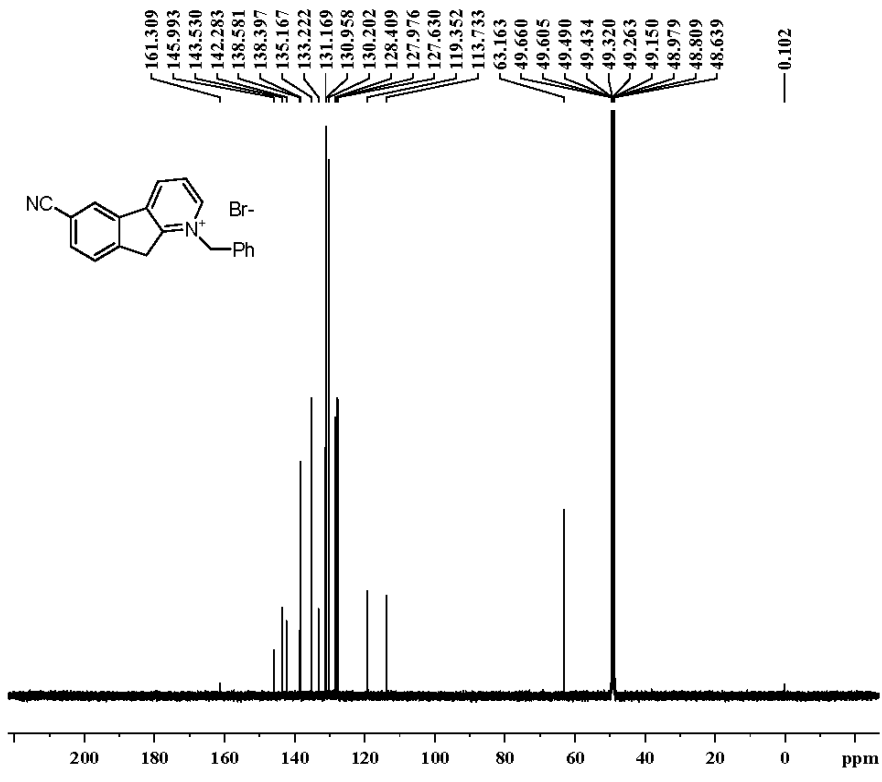

```

Current Data Parameters
NAME      102992-091
EXPNO     2
PROCNO    1

F2 - Acquisition Parameters
Date_     20131107
Time      23.43
INSTRUM   spect
PROBHD    5 mm PABBO BB-
PULPROG   zgpg
TD         262144
SOLVENT   MeOD
NS         3200
DS         0
SWH        31250.000 Hz
FIDRES     0.119209 Hz
AQ         4.1943040 sec
RG         2050
DW         16.000 usec
DE         6.50 usec
TE         299.0 K
D1         1.00000000 sec
d11        0.03000000 sec
DELTA      0.89999998 sec
TD0        1
SFO1       125.7698617 MHz
NUC1       13C
P1         10.64 usec
PLW1       -1.00000000 W
SFO2       500.1325007 MHz
NUC2       1H
CPDPRG2   waltz16
PCPD2     80.00 usec
PLW2       -1.00000000 W
PLW12      -1.00000000 W
PLW13      -1.00000000 W

F2 - Processing parameters
SI         131072
SF         125.7575940 MHz
WDW        EM
SSB        0
LB         0.30 Hz
GB         0
PC         1.40
  
```

Sample in CD3OH

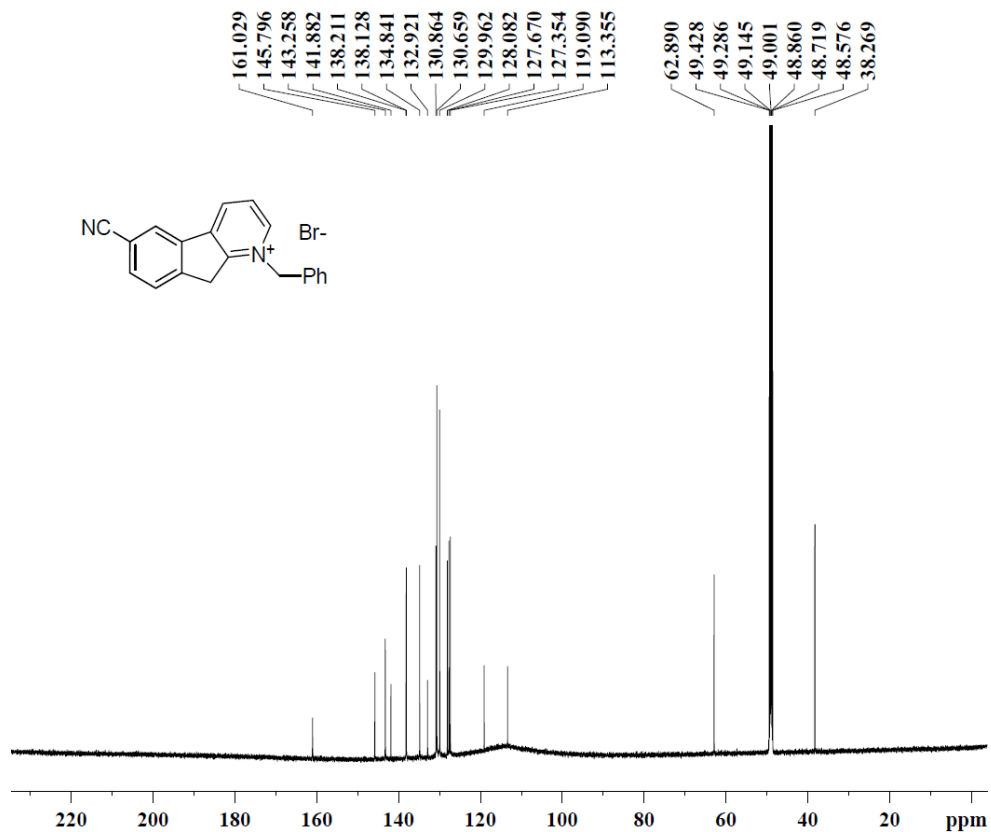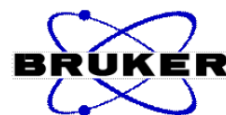

Current Data Parameters  
NAME h223  
EXPNO 2  
PROCNO 1

F2 - Processing parameters  
SI 32768  
SF 150.8799875 MHz  
WDW EM  
SSB 0  
LB 1.00 Hz  
GB 0  
PC 1.40



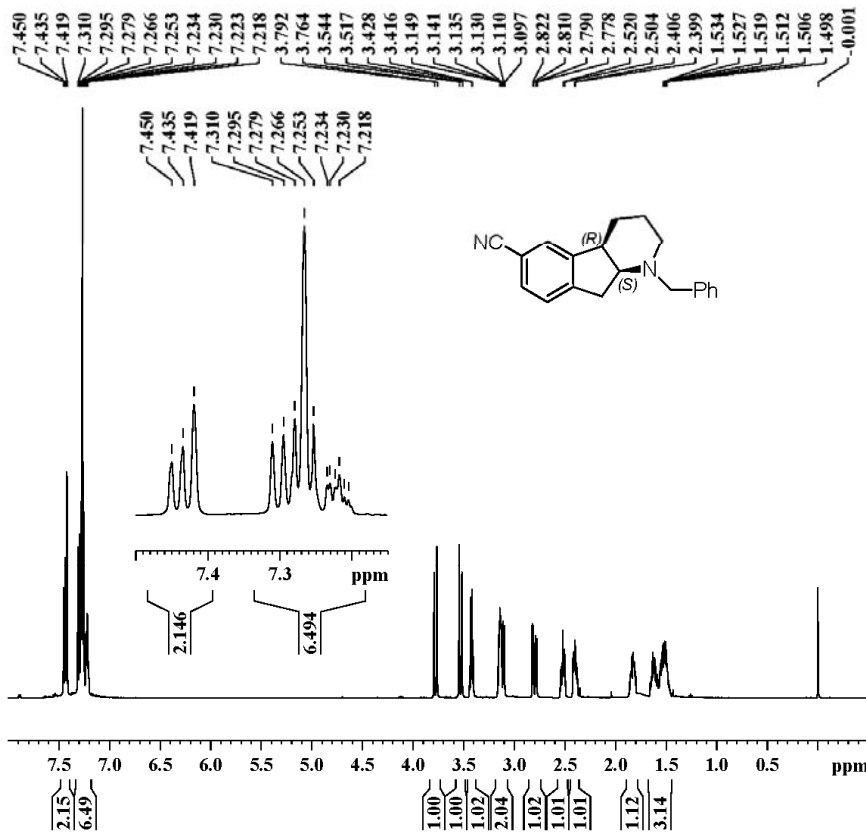

Current Data Parameters  
 NAME 103790-069  
 EXPNO 1  
 PROCNO 1

F2 - Acquisition Parameters  
 Date\_ 20160405  
 Time\_ 16.33  
 INSTRUM spect  
 PROBHD 5 mm PABBO BB-  
 PULPROG zg10  
 TD 32768  
 SOLVENT CDCl3  
 NS 32  
 DS 0  
 SWH 7500.000 Hz  
 FIDRES 0.228882 Hz  
 AQ 2.1845334 sec  
 RG 287  
 DW 66.667 usec  
 DE 6.50 usec  
 TE 299.0 K  
 DL 1.00000000 sec  
 TDO 1

===== CHANNEL f1 =====  
 SF01 500.1325007 MHz  
 NUC1 1H  
 P1 11.75 usec  
 PLW1 18.39999962 W

F2 - Processing parameters  
 SI 16384  
 SF 500.1300153 MHz  
 MDW EM  
 SSB 0  
 LB 0.30 Hz  
 GB 0  
 PC 1.00

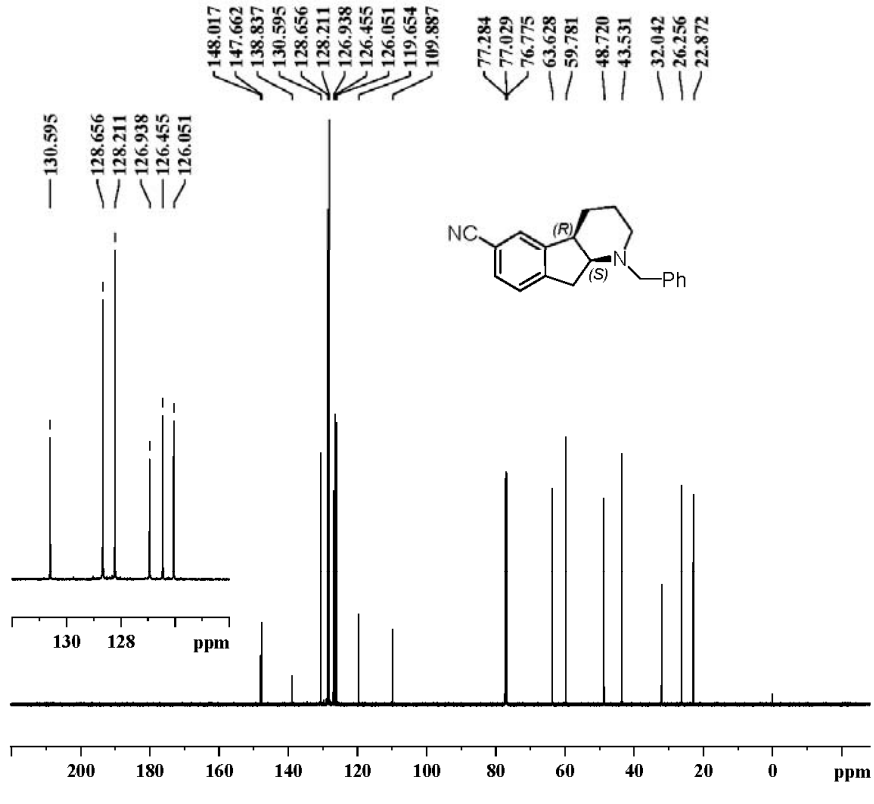

```

Current Data Parameters
NAME      103790-069
EXPNO     2
PROCNO    1

F2 - Acquisition Parameters
Date_     20160405
Time      18.54
INSTRUM   spect
PROBHD    5 mm PABBO BB-
PULPROG   zgpg
TD         262144
SOLVENT   CDCl3
NS         1600
DS         0
SWH        31250.000 Hz
FIDRES     0.119209 Hz
AQ         4.1943040 sec
RG         1820
DW         16.000 usec
DE         6.50 usec
TE         299.0 K
D1         1.00000000 sec
D11        0.03000000 sec
TD0        1

===== CHANNEL f1 =====
SFO1      125.7698617 MHz
NUC1       13C
P1         9.75 usec
PLW1      126.0000000 W

===== CHANNEL f2 =====
SFO2      500.1325007 MHz
NUC2       1H
CPDPRG2   waltz16
PCPD2     80.00 usec
PLW2      18.3999962 W
PLW12     0.41056001 W
PLW13     0.20651001 W

F2 - Processing parameters
SI         131072
SF         125.7577903 MHz
WDW        EM
SSB        0
LB         0.30 Hz
GB         0
PC         1.40
  
```

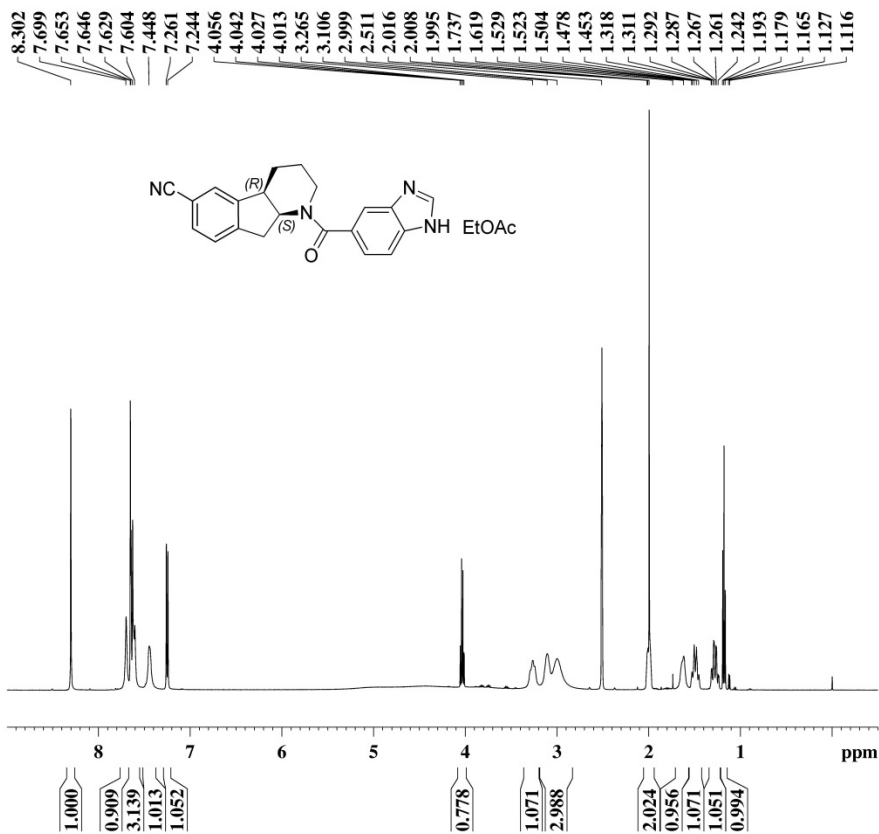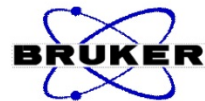

Current Data Parameters  
 NAME 103790-071  
 EXPNO 1  
 PROCNO 1

F2 - Acquisition Parameters  
 Date\_ 20160406  
 Time 4.29  
 INSTRUM spect  
 PROBHD 5 mm PABBO BB-  
 PULPROG zg10  
 TD 32768  
 SOLVENT DMSO  
 NS 32  
 DS 0  
 SWH 15000.000 Hz  
 FIDRES 0.457764 Hz  
 AQ 1.0922667 sec  
 RG 287  
 DW 33.333 usec  
 DE 6.50 usec  
 TE 299.0 K  
 D1 1.0000000 sec  
 TDO 1

===== CHANNEL f1 =====  
 SF01 500.1325007 MHz  
 NUC1 1H  
 P1 11.75 usec  
 PLW1 18.39999962 W

F2 - Processing parameters  
 SI 16384  
 SF 500.1299982 MHz  
 WDW EM  
 SSB 0  
 LB 0.30 Hz  
 GB 0  
 PC 1.00

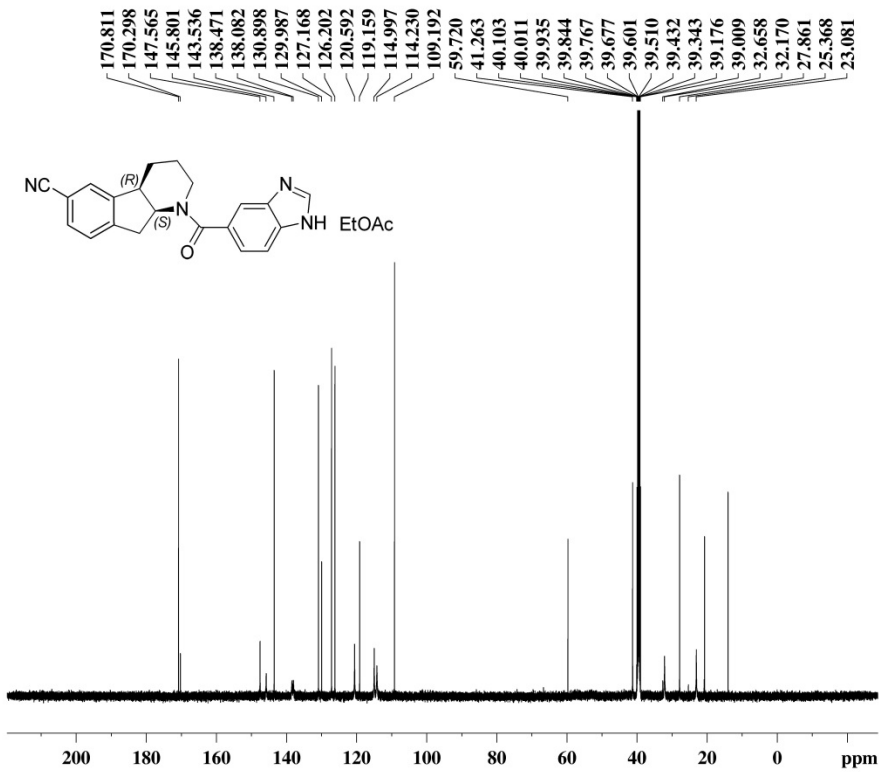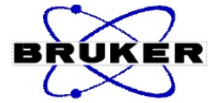

Current Data Parameters  
NAME 103790-071  
EXPNO 2  
PROCNO 1

F2 - Acquisition Parameters  
Date\_ 20160406  
Time 6.50  
INSTRUM spect  
PROBHD 5 mm PABBO BB-  
PULPROG zgpg  
TD 262144  
SOLVENT DMSO  
NS 1600  
DS 0  
SWH 31250.000 Hz  
FIDRES 0.119209 Hz  
AQ 4.1943040 sec  
RG 2050  
DW 16.000 usec  
DE 6.50 usec  
TE 299.0 K  
D1 1.0000000 sec  
D11 0.03000000 sec  
TDO 1

===== CHANNEL f1 =====  
SFO1 125.7698617 MHz  
NUC1 13C  
P1 9.75 usec  
PLW1 126.00000000 W

===== CHANNEL f2 =====  
SFO2 500.1325007 MHz  
NUC2 1H  
CPDPRG[2] waltz16  
PCPD2 80.00 usec  
PLW2 18.39999962 W  
PLW12 0.41056001 W  
PLW13 0.20651001 W

F2 - Processing parameters  
SI 131072  
SF 125.7578512 MHz  
WDW EM  
SSB 0  
LB 0.30 Hz  
GB 0  
PC 1.40

VT at T=353K

9.413  
7.899  
7.887  
7.884  
7.649  
7.572  
7.570  
7.566  
7.563  
7.557  
7.555  
7.548  
7.546  
7.433  
7.418  
3.298  
3.277  
3.265  
3.245  
3.188  
3.175  
3.165  
3.057  
3.048  
3.029  
3.014  
2.507  
2.503  
2.500  
2.496  
2.492  
1.624  
1.618  
1.542  
1.360  
1.357  
1.349  
1.330  
1.323

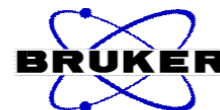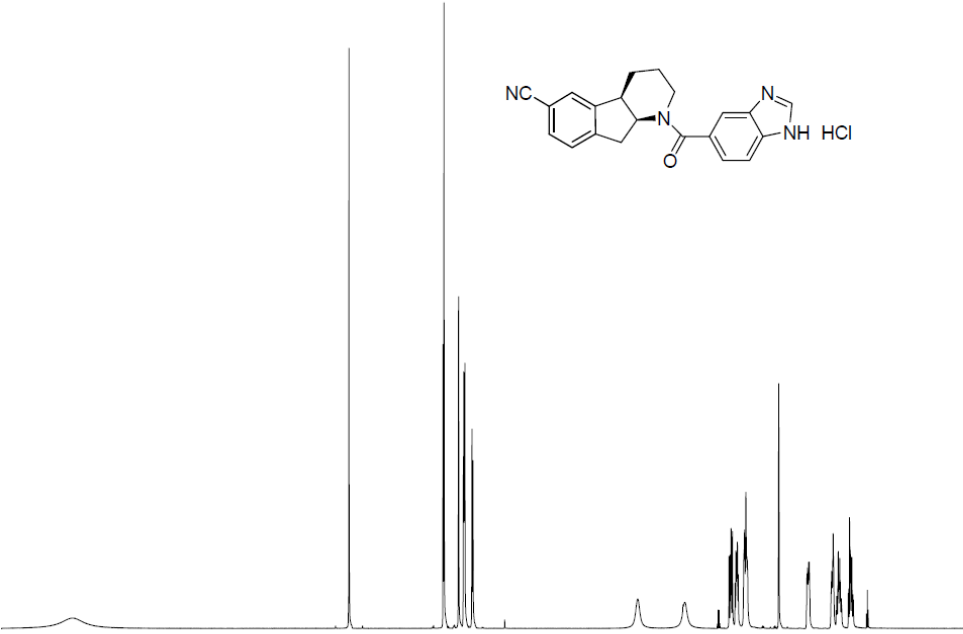

Current Data Parameters  
NAME A8633  
EXFNO 1  
PROCNO 1

F2 - Acquisition Parameters  
Date\_ 20130424  
Time\_ 8.15  
INSTRUM spect  
PROBHD 5 mm PABBO BB-  
PULPROG q\_zg10  
TD 32768  
SOLVENT DMSO  
NS 128  
DS 0  
SWH 9014.423 Hz  
FIDRES 0.275098 Hz  
AQ 1.8175317 sec  
RG 322  
DW 55.467 usec  
DE 6.50 usec  
TE 353.1 K  
D1 2.00000000 sec  
TD0 1

===== CHANNEL f1 =====  
NUC1 1H  
P1 11.70 usec  
PL1 2.10 dB  
PL1W 18.43091774 W  
SF01 500.1334009 MHz

F2 - Processing parameters  
SI 16384  
SF 500.1300051 MHz  
WDW EM  
SSB 0  
LB 0.10 Hz  
GB 0  
PC 1.00

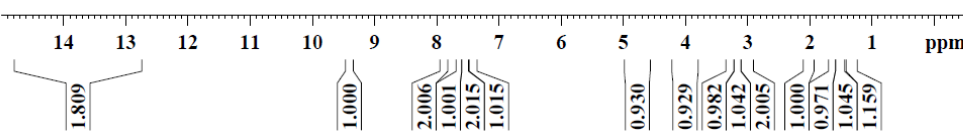

VT at T=353K

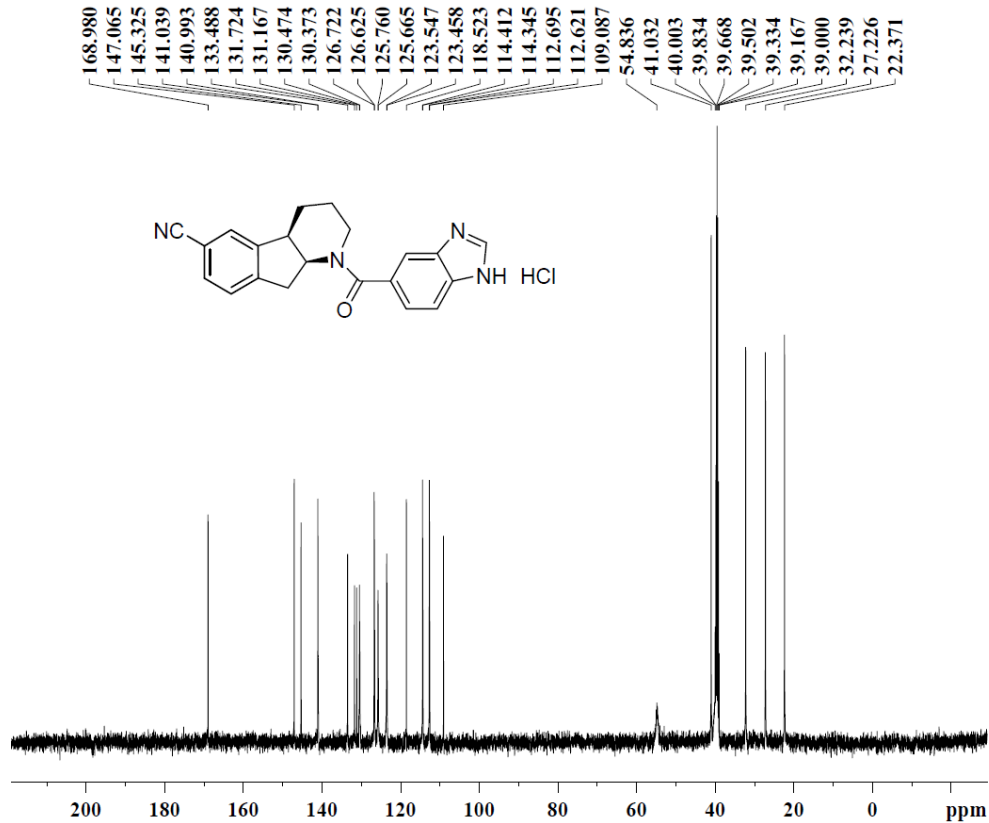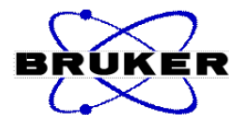

Current Data Parameters  
NAME A8633  
EXPNO 2  
PROCNO 1

F2 - Processing parameters  
SI 131072  
SF 125.7579035 MHz  
WDW EM  
SSB 0  
LB 2.00 Hz  
GB 0  
PC 1.40

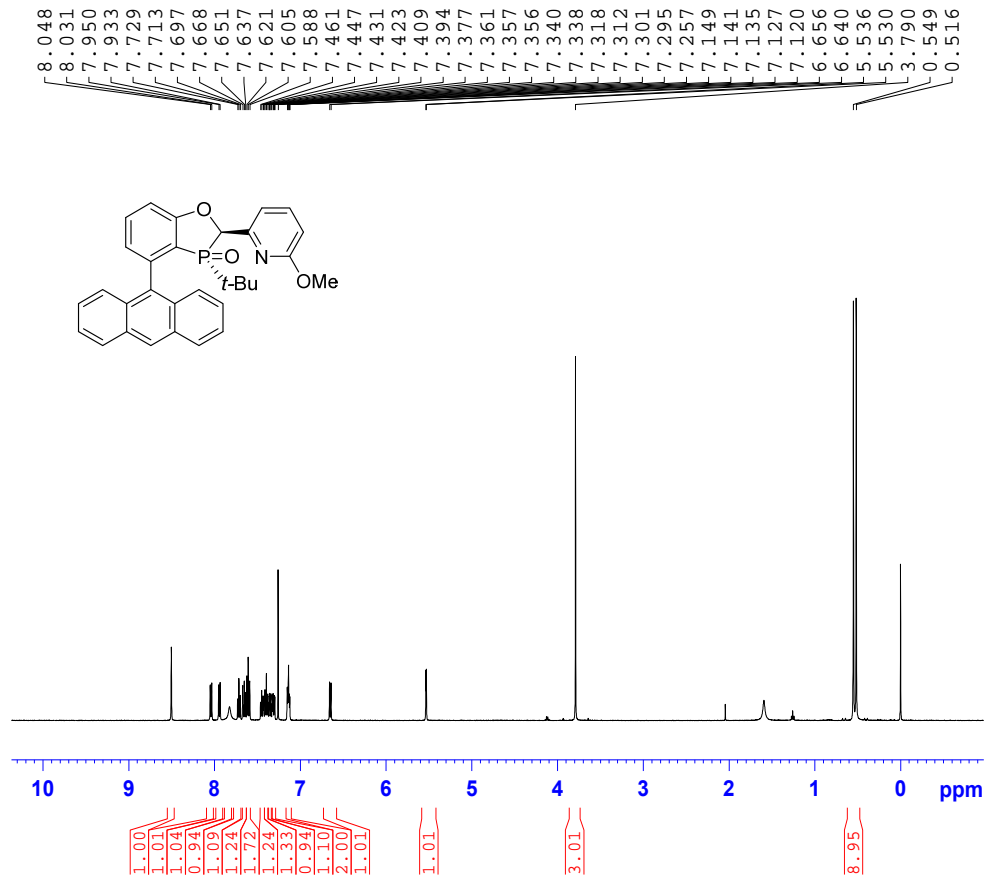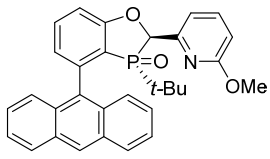

Current Data Parameters  
 NAME 10889-180  
 EXPNO 1  
 PROCNO 1

F2 - Acquisition Parameters  
 Date\_ 20160531  
 Time 22.22  
 INSTRUM spect  
 PROBHD 5 mm PABBO BB-  
 FULPROG zg10  
 TD 32768  
 SOLVENT CDCl3  
 NS 16  
 DS 0  
 SWH 7500.000 Hz  
 FIDRES 0.228882 Hz  
 AQ 2.1845334 sec  
 RG 456  
 DW 66.667 usec  
 DE 6.50 usec  
 TE 299.0 K  
 D1 1.00000000 sec  
 TD0 1

==== CHANNEL f1 =====  
 SF01 500.1325007 MHz  
 NUC1 1H  
 P1 11.75 usec  
 PLW1 18.39999962 W

F2 - Processing parameters  
 SI 16384  
 SF 500.1300128 MHz  
 WDW EM  
 SSB 0  
 LB 0.30 Hz  
 GB 0  
 PC 1.00

165.132  
164.995  
151.946  
151.912  
142.523  
142.476  
139.355  
139.339  
134.807  
134.793  
134.348  
131.459  
131.281  
130.623  
130.552  
128.944  
128.461  
128.025  
127.513  
126.727  
126.662  
126.402  
126.089  
125.906  
125.700  
125.003  
114.420  
114.396  
113.509  
113.468  
110.339  
110.322  
78.107  
77.668  
77.472  
77.218  
76.964  
53.559  
34.135  
33.567  
24.260  
24.253

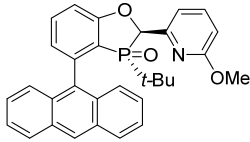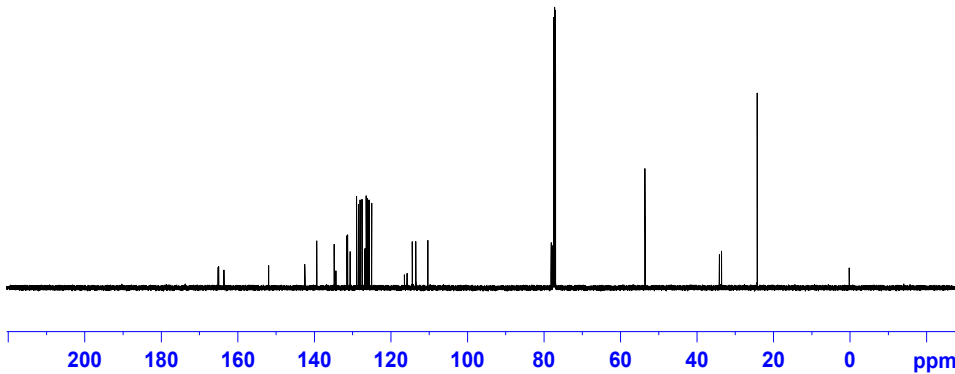

Current Data Parameters  
NAME 10889-180  
EXPNO 3  
PROCNO 1

F2 - Acquisition Parameters  
Date\_ 20160531  
Time 23.56  
INSTRUM spect  
PROBHD 5 mm PABBO BB-  
PULPROG zgpg  
TD 262144  
SOLVENT CDC13  
NS 1024  
DS 0  
SWH 31250.000 Hz  
FIDRES 0.119209 Hz  
AQ 4.1943040 sec  
RG 2050  
DW 16.000 usec  
DE 6.50 usec  
TE 299.0 K  
D1 1.00000000 sec  
D11 0.03000000 sec  
TD0 1

==== CHANNEL f1 =====  
SFO1 125.7698617 MHz  
NUC1 13C  
P1 9.75 usec  
PLW1 126.00000000 W

==== CHANNEL f2 =====  
SFO2 500.1325007 MHz  
NUC2 1H  
CPDPRG[2] waltz16  
PCPD2 80.00 usec  
PLW2 18.39999962 W  
PLW12 0.41056001 W  
PLW13 0.20651001 W

F2 - Processing parameters  
SI 131072  
SF 125.7577641 MHz  
WDW EM  
SSB 0  
LB 0.30 Hz  
GB 0  
PC 1.40

7.490  
7.455  
7.441  
7.427  
7.425  
7.415  
7.412  
7.402  
7.398  
7.396  
7.385  
7.382  
7.354  
7.340  
7.324  
7.260  
7.257  
7.240  
7.209  
7.063  
7.060  
7.056  
7.047  
7.028  
7.027  
6.858  
6.844  
6.626  
6.610  
5.895  
3.818  
0.607  
0.582

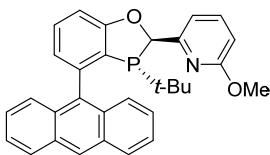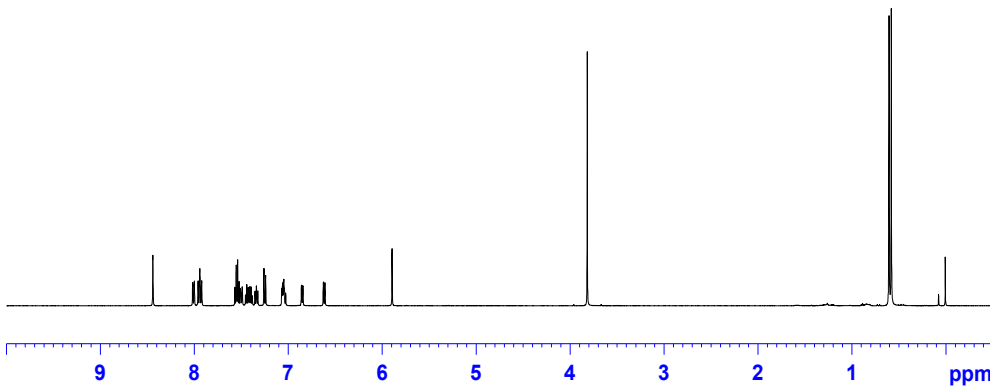

Current Data Parameters  
NAME 10889-187  
EXPNO 1  
PROCNO 1

F2 - Acquisition Parameters  
Date\_ 20160527  
Time 11.20  
INSTRUM spect  
PROBHD 5 mm PABBO BB-  
PULPROG zg10  
TD 32768  
SOLVENT CDC13  
NS 16  
DS 0  
SWH 7500.000 Hz  
FIDRES 0.228882 Hz  
AQ 2.1845334 sec  
RG 406  
DW 66.667 usec  
DE 6.50 usec  
TE 299.0 K  
D1 1.00000000 sec  
TD0 1

==== CHANNEL f1 =====  
SFO1 500.1325007 MHz  
NUC1 1H  
P1 11.75 usec  
PLW1 18.39999962 W

F2 - Processing parameters  
SI 16384  
SF 500.1300111 MHz  
WDW EM  
SSB 0  
LB 0.30 Hz  
GB 0  
PC 1.00

1.00  
0.99  
1.99  
2.00  
1.01  
1.99  
1.01  
1.27  
1.74  
0.97  
0.97  
3.03  
9.01



158.791  
142.801  
142.670  
139.205  
139.192  
136.377  
131.661  
131.505  
131.425  
130.855  
128.941  
128.784  
128.424  
127.323  
127.283  
127.251  
127.176  
125.708  
125.671  
125.546  
125.490  
125.241  
125.113  
125.070  
111.640  
111.607  
110.383  
109.337  
109.316  
86.013  
85.795  
77.480  
77.226  
76.972  
53.318  
31.818  
31.638  
27.212  
27.096

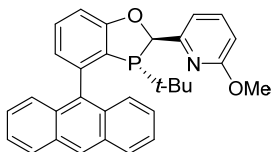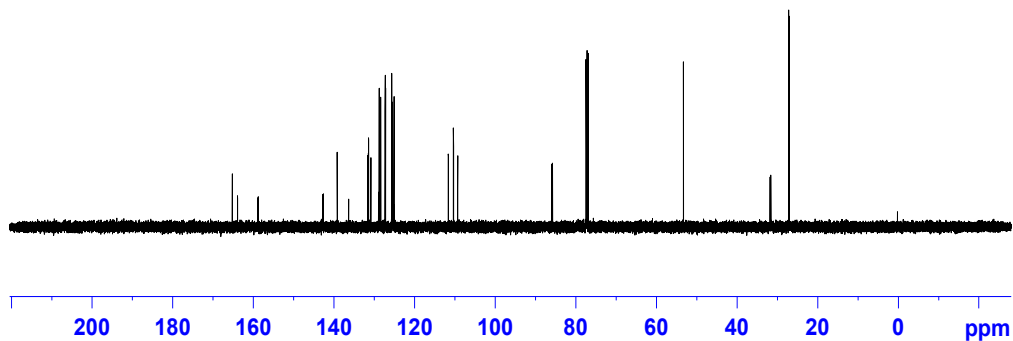

Current Data Parameters  
NAME 10889-187  
EXPNO 3  
PROCNO 1

F2 - Acquisition Parameters  
Date\_ 20160527  
Time 11.45  
INSTRUM spect  
PROBHD 5 mm PABBO BB-  
PULPROG zgpg  
TD 262144  
SOLVENT CDCl3  
NS 250  
DS 0  
SWH 31250.000 Hz  
FIDRES 0.119209 Hz  
AQ 4.1943040 sec  
RG 2050  
DW 16.000 usec  
DE 6.50 usec  
TE 299.0 K  
D1 1.00000000 sec  
D11 0.03000000 sec  
TD0 1

==== CHANNEL f1 =====  
SF01 125.7698617 MHz  
NUC1 13C  
P1 9.75 usec  
PLW1 126.00000000 W

==== CHANNEL f2 =====  
SF02 500.1325007 MHz  
NUC2 1H  
CPDPRG[2] waltz16  
PCPD2 80.00 usec  
PLW2 18.39999962 W  
PLW12 0.41056001 W  
PLW13 0.20651001 W

F2 - Processing parameters  
SI 131072  
SF 125.7577612 MHz  
WDW EM  
SSB 0  
LB 0.30 Hz  
GB 0  
PC 1.40

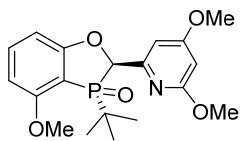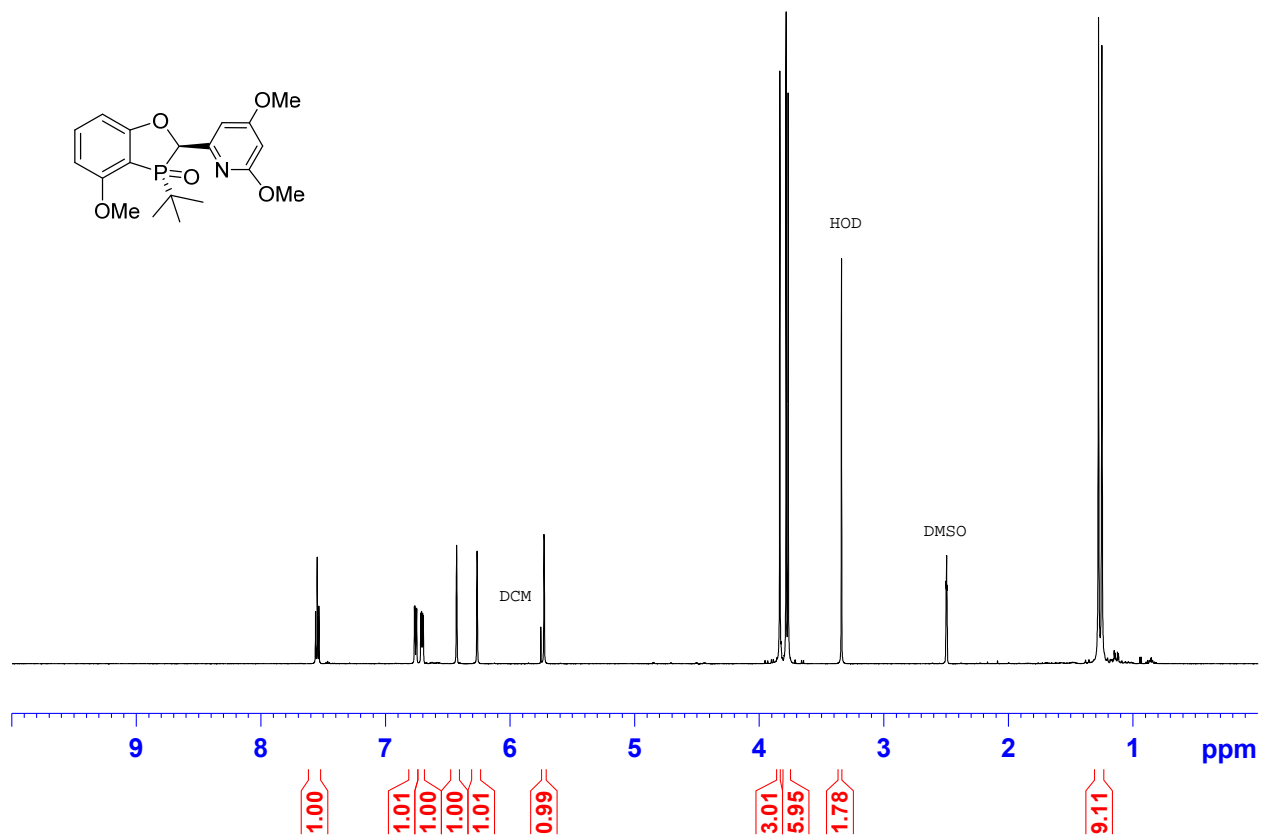

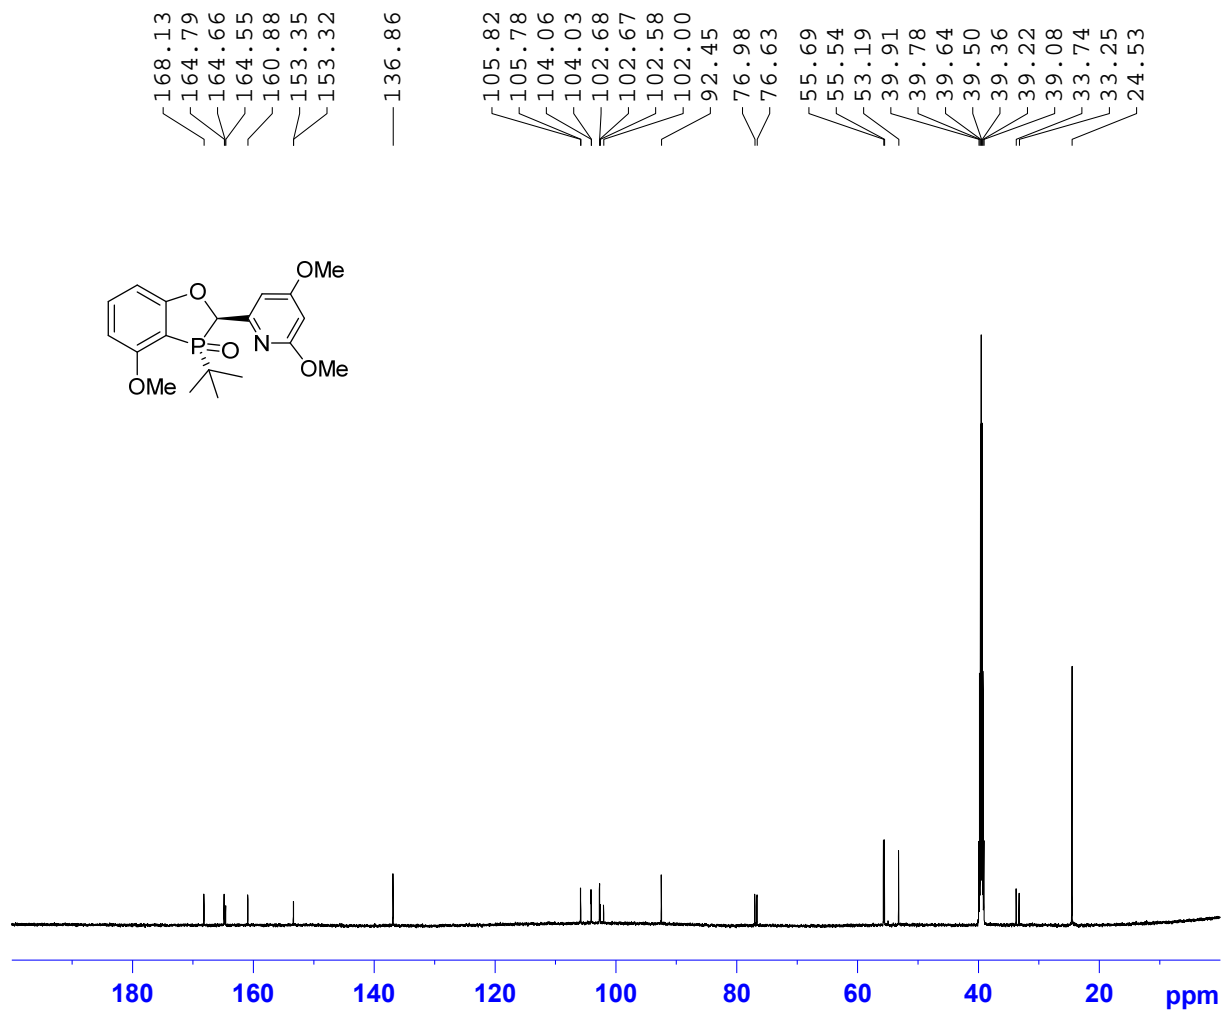

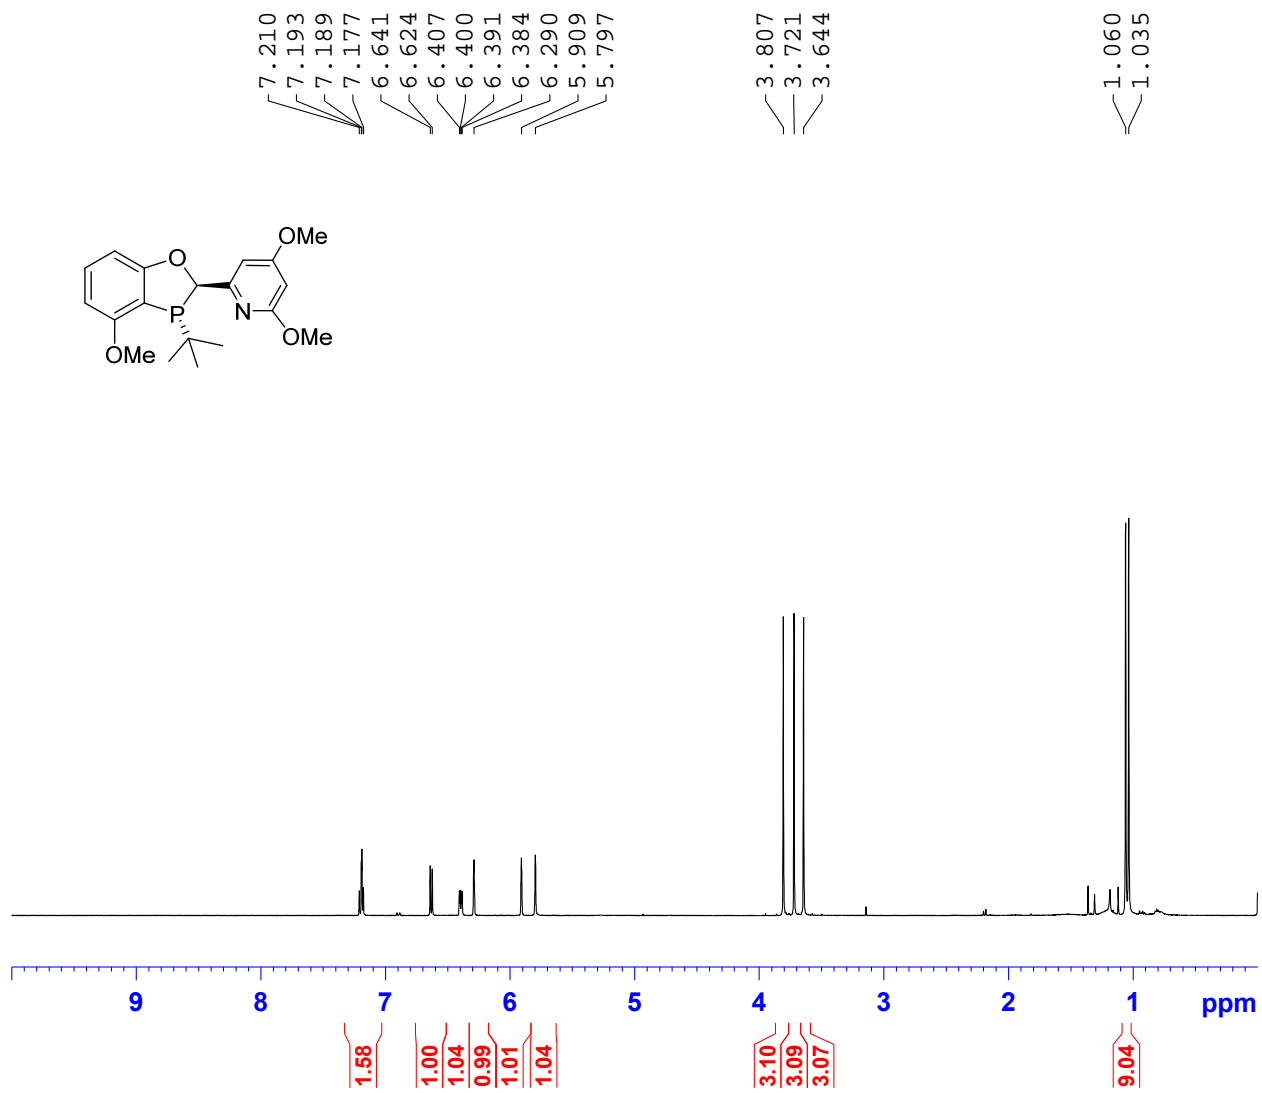

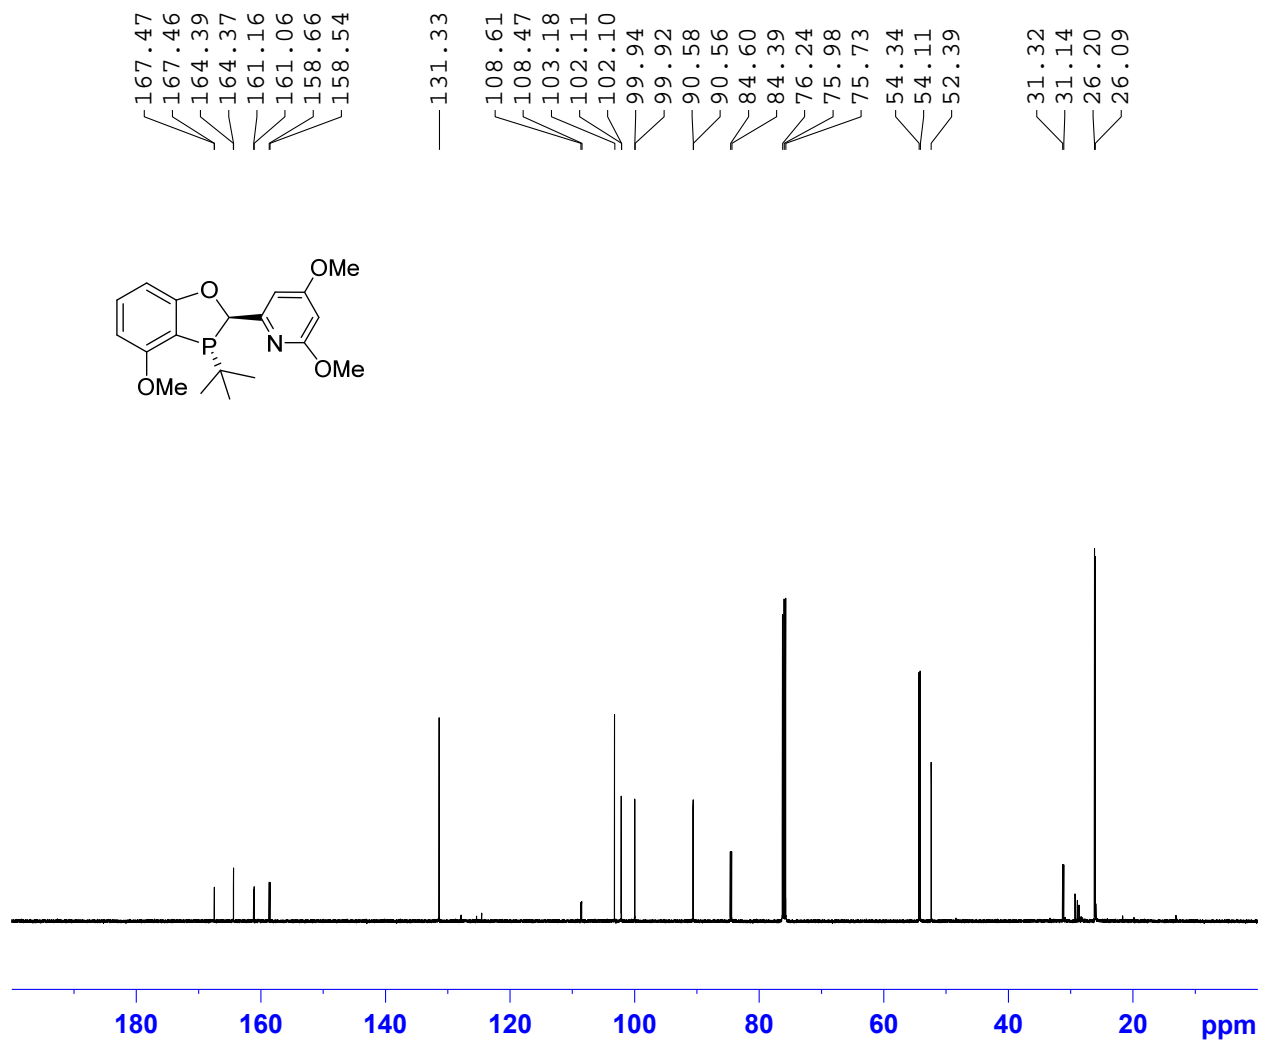

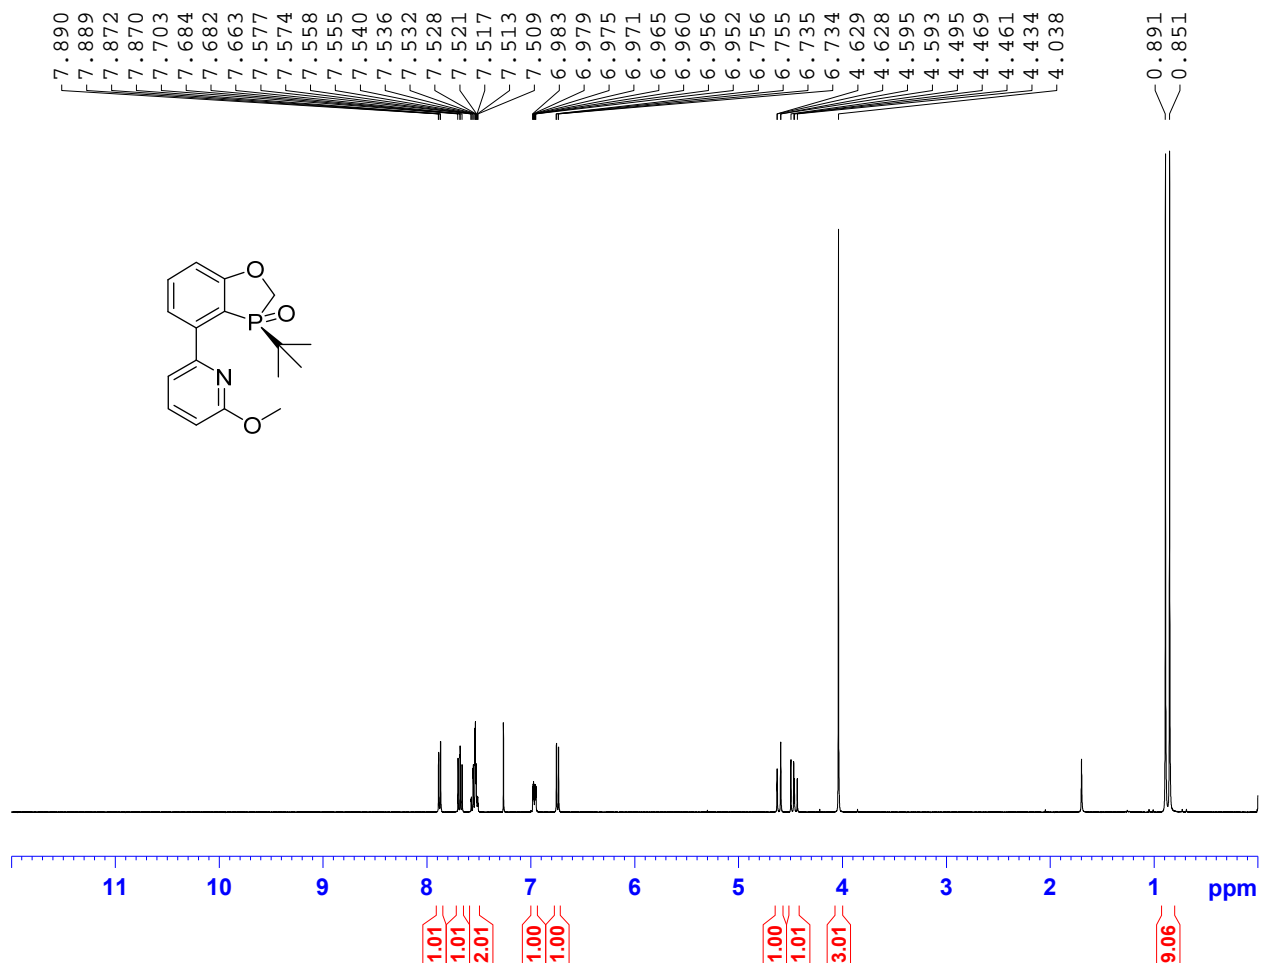

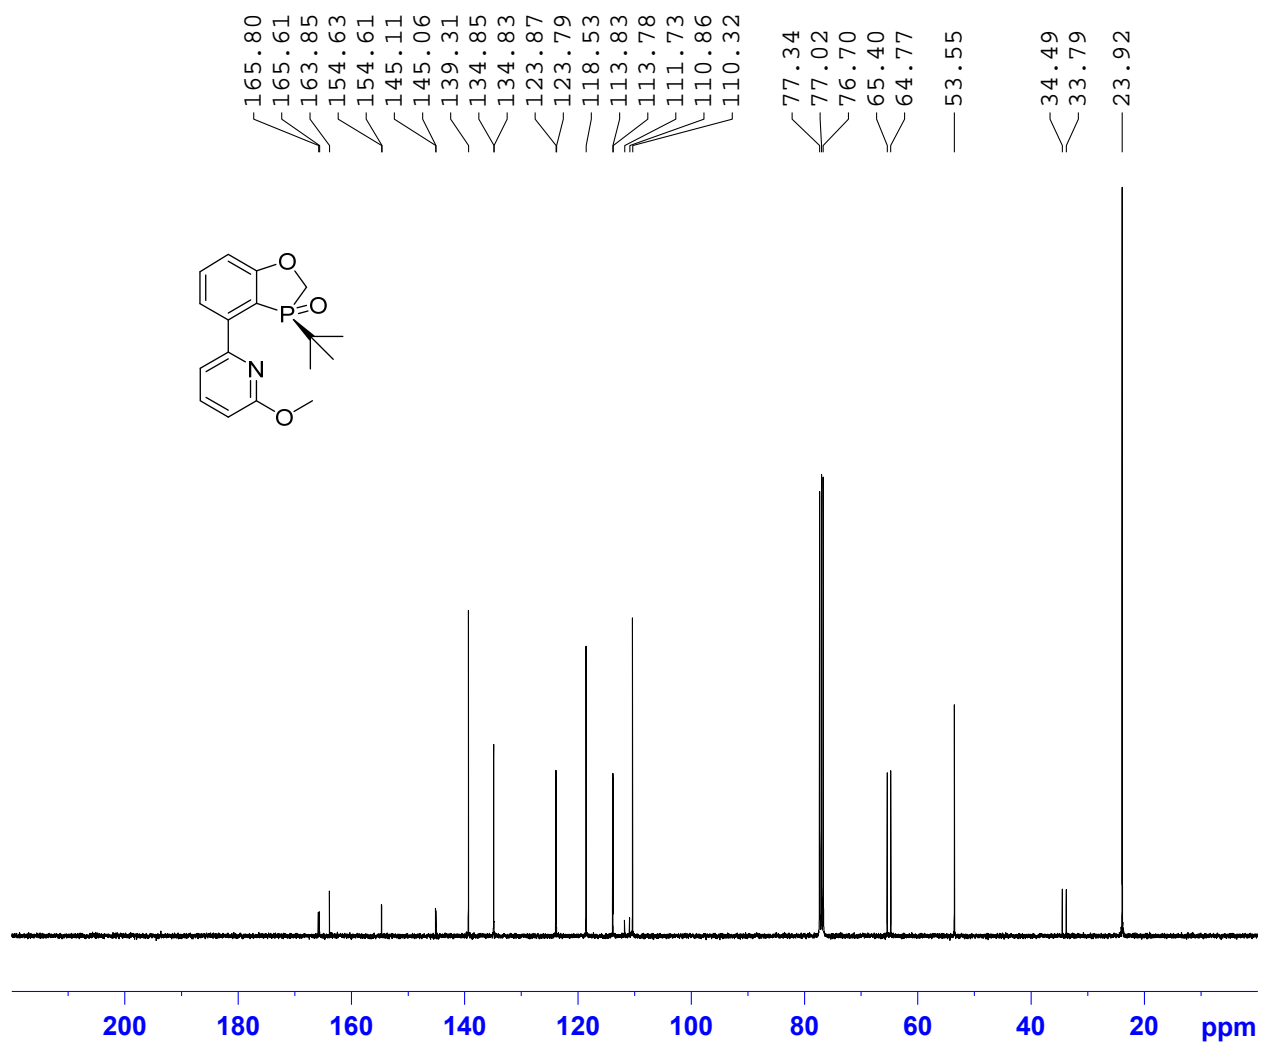

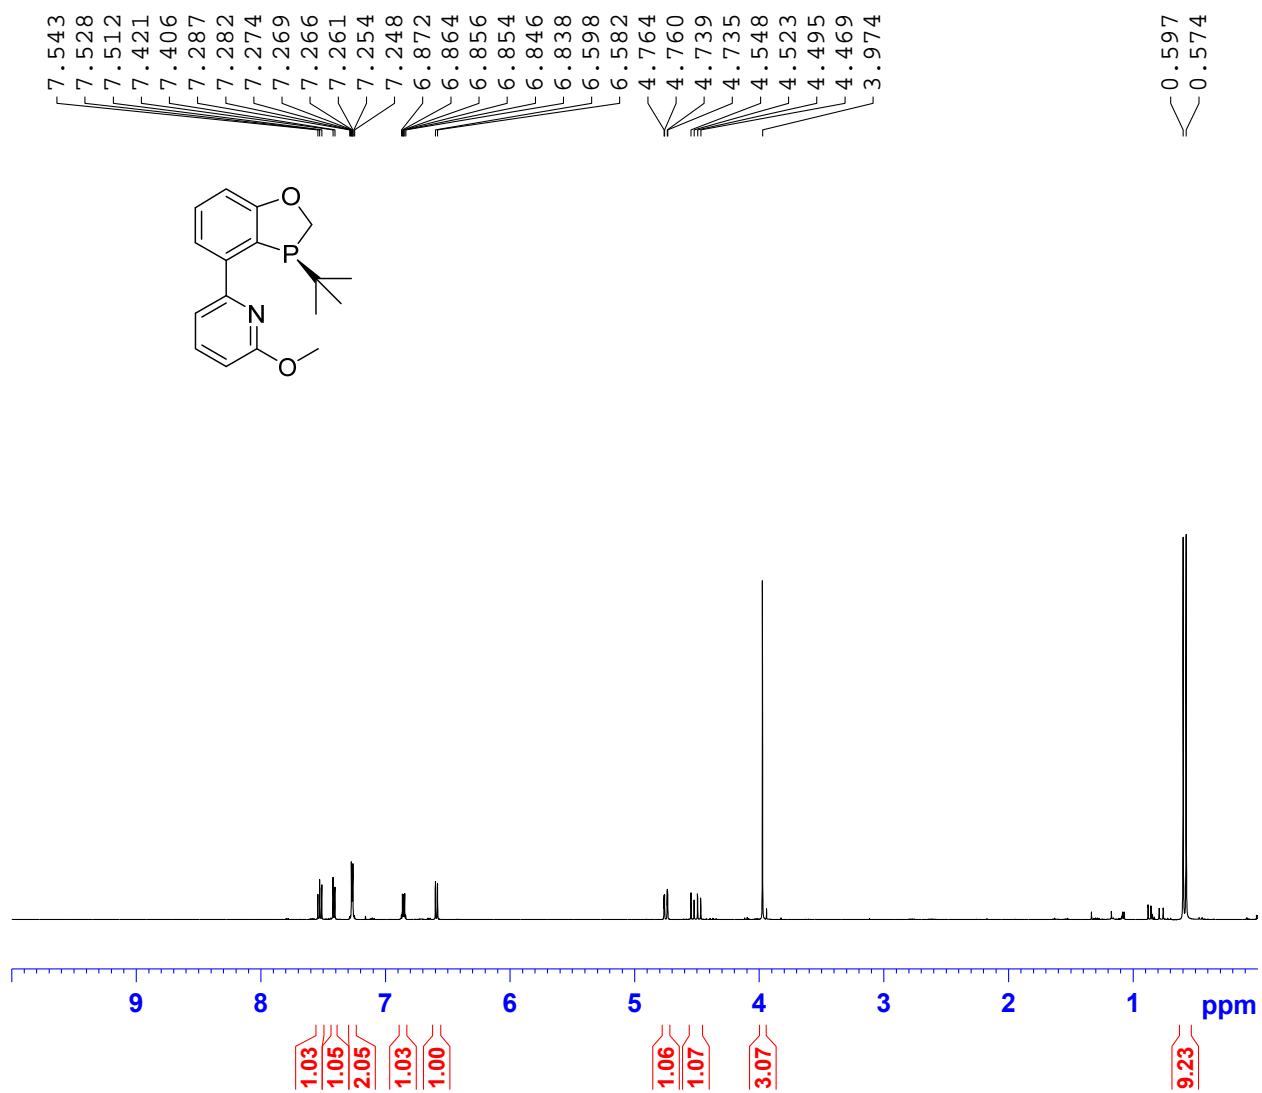



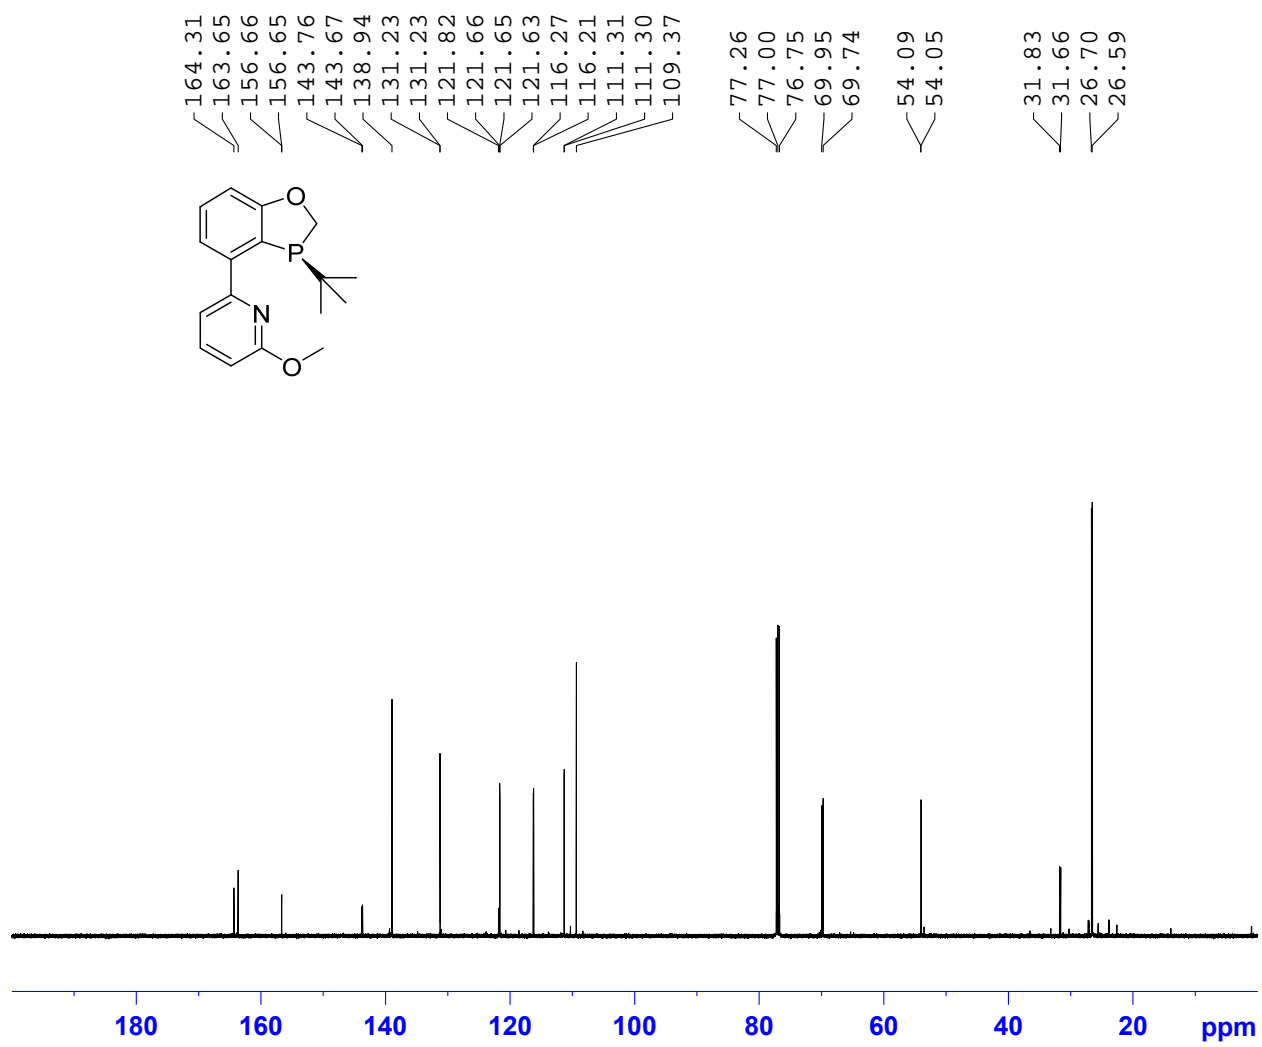

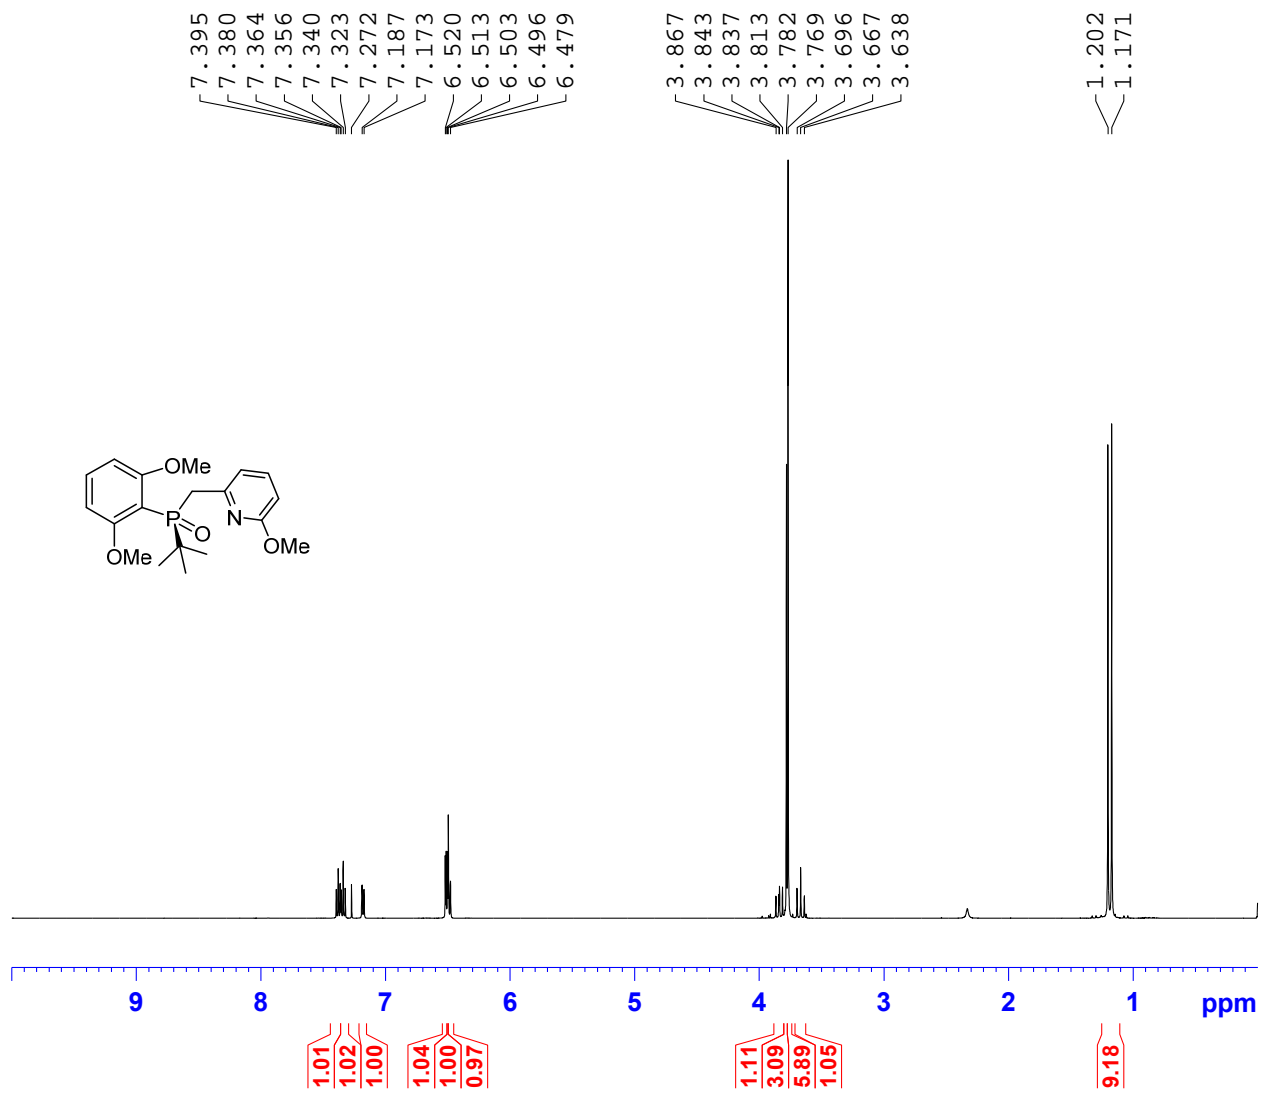

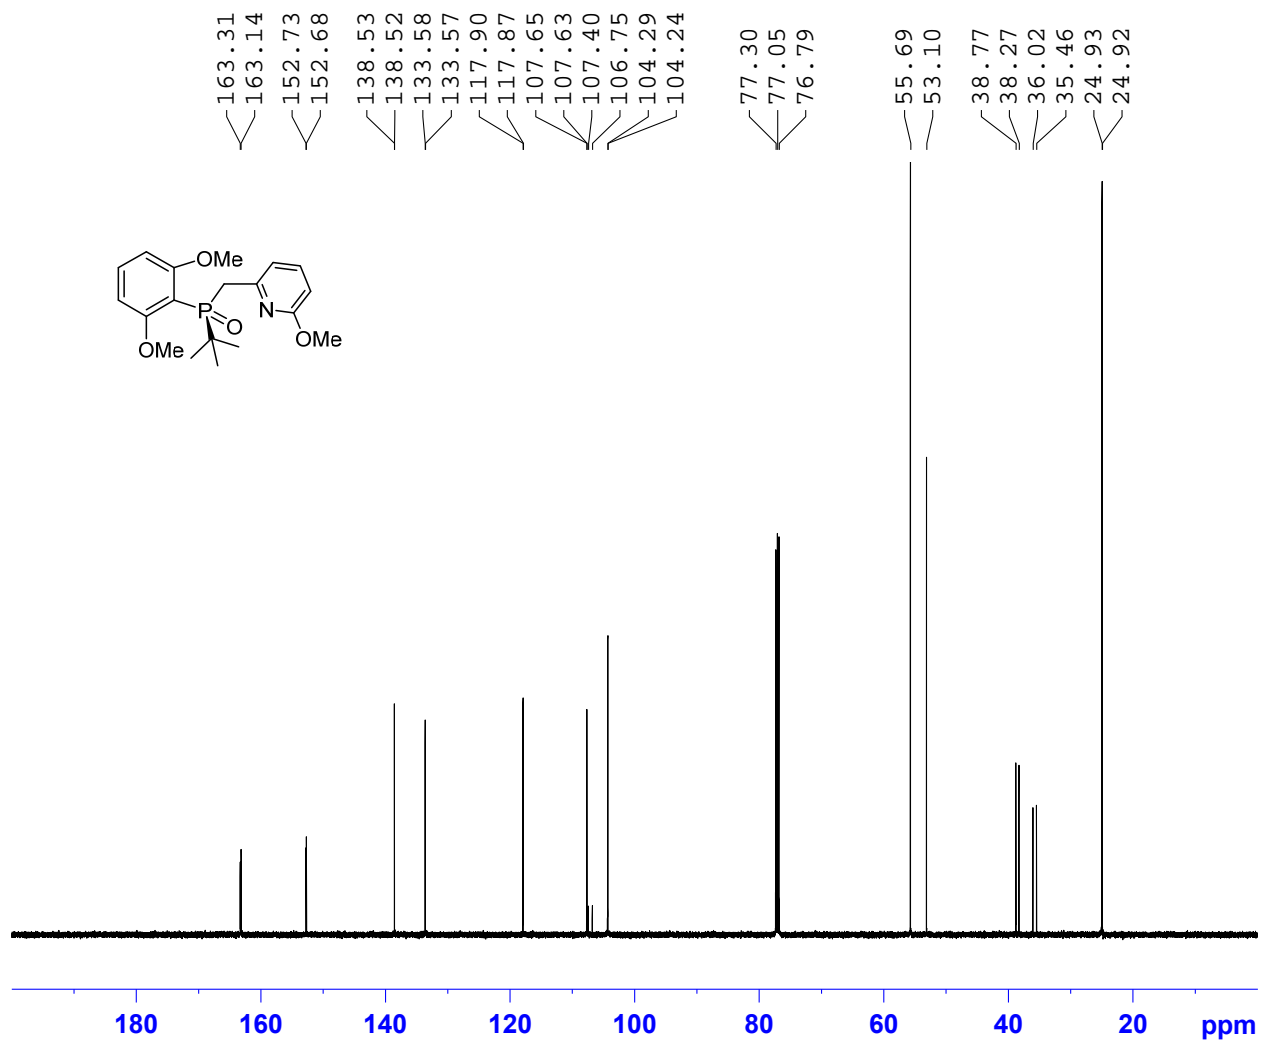

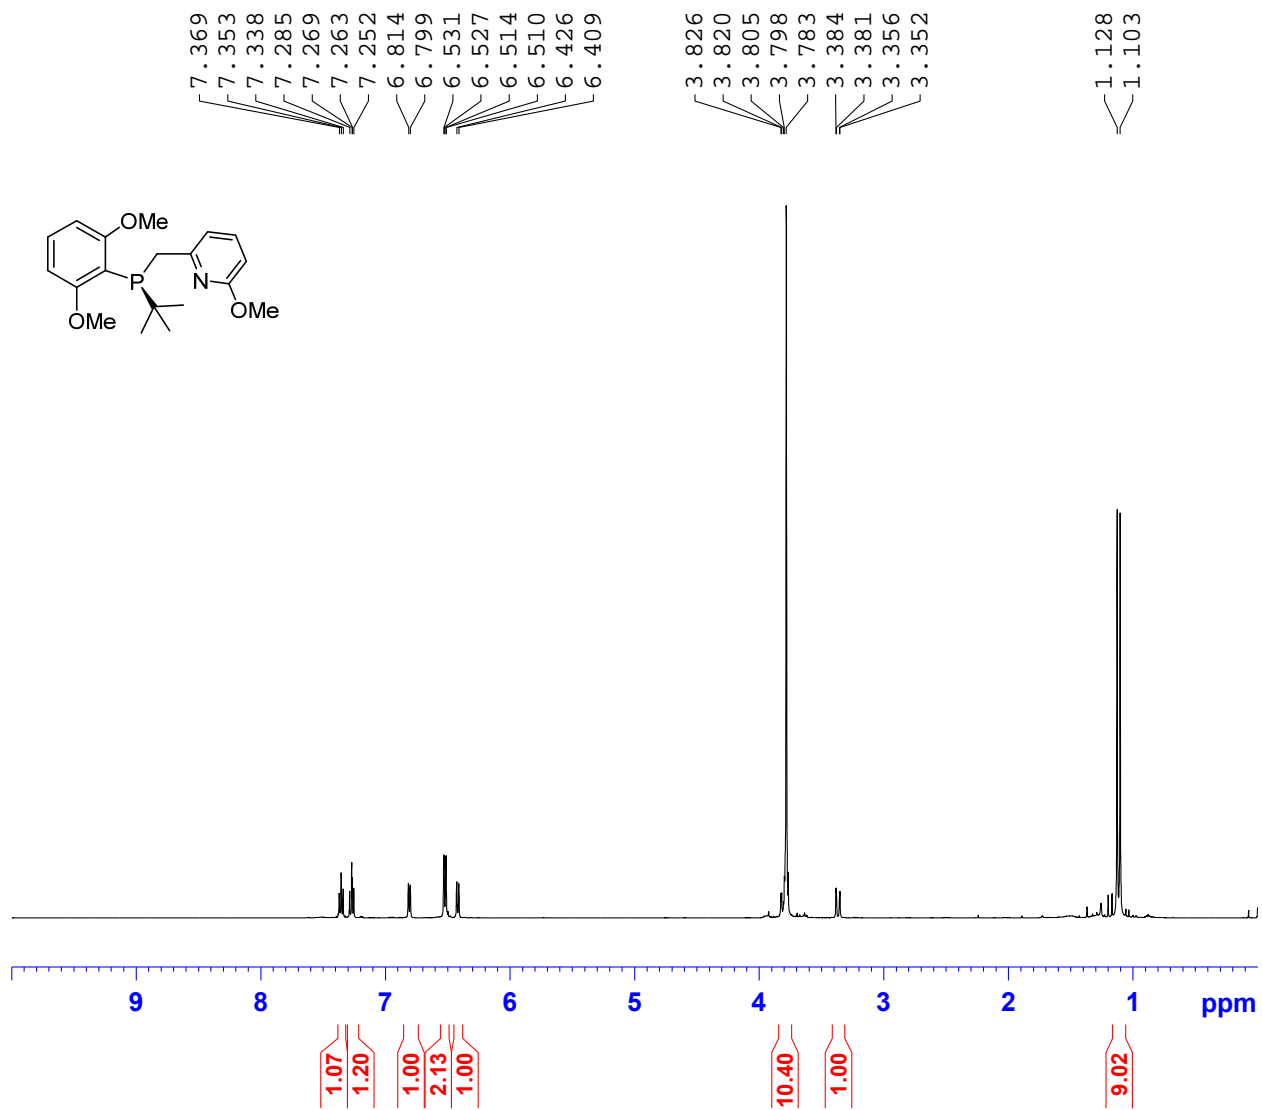

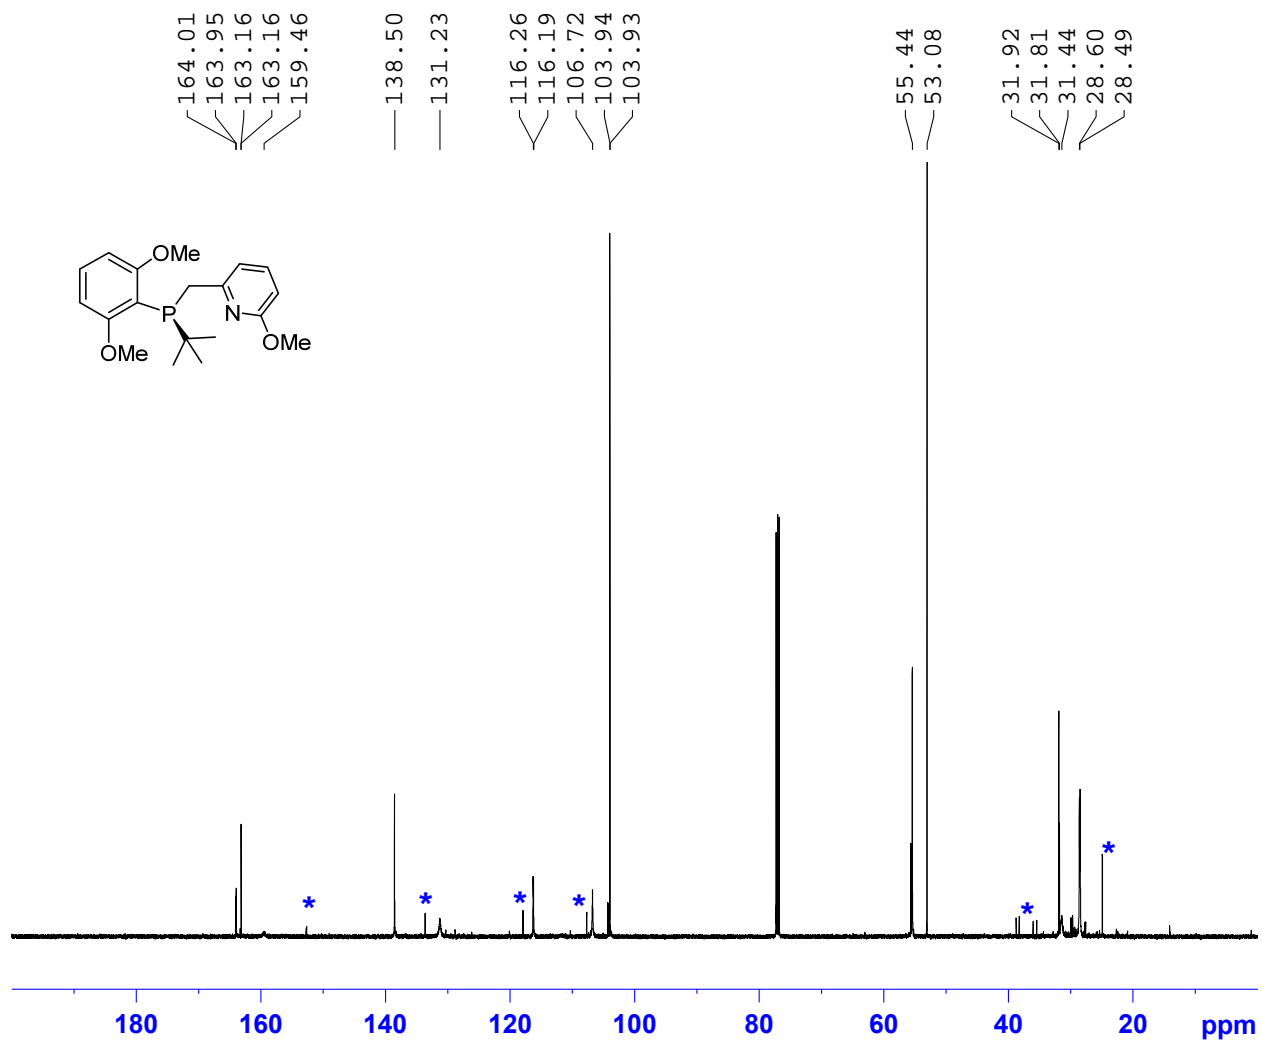

\* Phosphine oxide

## Kinetics studies of the intramolecular C-H arylation of 7b using catalyst PdCl<sub>2</sub>(dppf)

### General information:

Reactions were carried out in an Insight Omnical Super CRC reaction calorimeter. The system operates as a differential scanning calorimeter by comparing the heat released or consumed in sample vessels compared to a reference compartment. The sample vessel is a 16 ml septum-cap vial equipped with a stirring bar.

The reaction was monitored by measuring the heat flow compared to the reference heat flow every 2-6 seconds. When the heat flow signal returned to the baseline at the end of the reaction, the system was calibrated by switching on a 23 mW heat source for *ca* 30 minutes. A mathematical correction was applied to allow compensation for the time lag of heat through the reactor walls. The same correction was applied to the heat profile from the reaction.

An energy balance around the reaction vessel demonstrates that for the case of a single reaction occurring, the reaction heat flow,  $q$ , is proportional to the reaction rate,  $r$ , where  $H_{rxn}$  is the heat of the reaction and  $V$  is the reaction volume.

$$q = \Delta H_{rxn} V r$$

If the units of reaction heat flow are given in watts ( $\text{mJ}\cdot\text{s}^{-1}$ ), the heat of the reaction in  $\text{J}\cdot\text{mol}^{-1}$ , and the reaction volume in l, the reaction rate will be given in  $\text{M}\cdot\text{s}^{-1}$ .

The heat of the reaction from integration of the observed heat flow vs. time gave an average value of 58 kcal/mole  $\pm$  5% at a reaction temperature of 115 °C. The observed heat flow profiles can be used to obtain the fractional conversion of bromobenzene by calculation of the fractional area under the temporal heat flow curve as given below, where the numerator represents the area under the heat flow to any time point  $t$  and the denominator represents the total area under the heat flow curve.

$$\text{fractional conversion} = \frac{\int_0^t q \cdot dt}{\int_0^{t_f} q \cdot dt}$$

Conversion determined from heat flow was compared to the conversion by LC measurement to ascertain that no side reaction contributed to the observed heat flow and that this represents an accurate measure of rate of the reaction under study.

## Procedure for reaction calorimetry

A solution of pyridinium **7b** (444 mg, 1.00 mmol) and DBU (457 mg, 3 mmol, 3 equiv.) in DMF (2.5 mL) was equilibrated thermally in a septum-cap vial at 110 °C. After thermal equilibration, a solution of PdCl<sub>2</sub>.ddpf (14.6 mg, 0.02 mmol, 2 mol%) or Pd<sub>2</sub>(dba)<sub>3</sub> (18.3 mg, 0.02 mmol, 2 mol%) in DMF (0.5 mL) was added in the reaction solution, while 0.5 mL of DMF was added in the reference compartment (2.8 ml DMF) to compensate the heat of mixing. A positive heat flow was detected over time as an exothermic heat was observed and the reaction was stopped when no more heat flow was detected. The reaction solution was worked-up using the regular procedure and the reaction conversion was analyzed by HPLC.

## Typical Graph

Figure x shows the kinetic profile for the reaction using Pd<sub>2</sub>(dba)<sub>3</sub> (2 mol%) and excess of DBU (9 equiv.). The reaction rate graph shows that the rate is constant over the consumption of the pyridinium **7b**, that would result in a zero order reaction in pyrimidine **7b** (ref : Blackmond, D.G, *Angew. Chem., Int. Ed.* **2005**, *44*, 4302.)

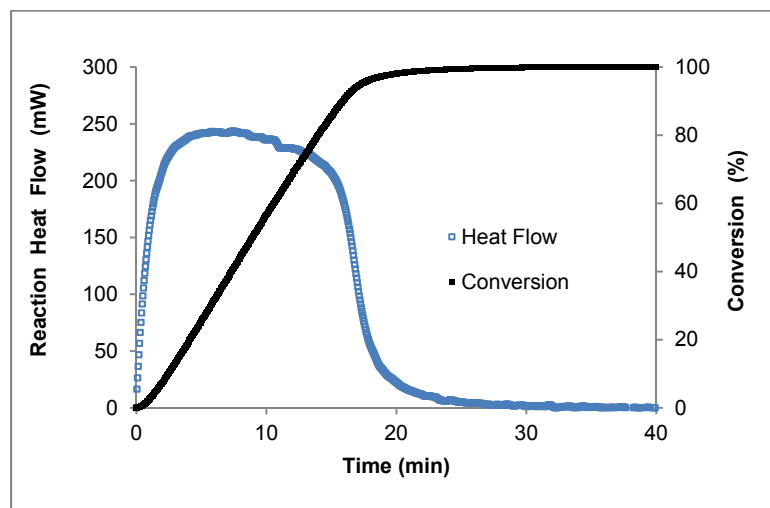

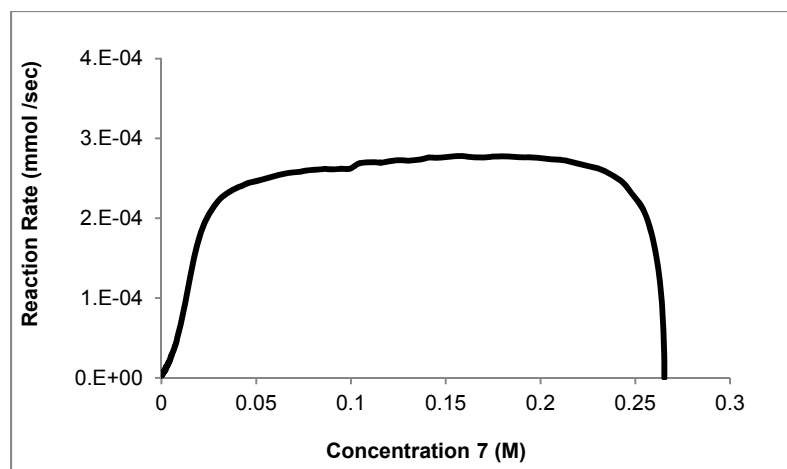

Using PdCl<sub>2</sub>.dppf (14.6 mg, 0.02 mmol, 2 mol%) and 9 equiv. of DBU, it was observed that the conversion is linear vs time, suggesting a zero order reaction in substrate. With 3 equiv. of DBU, and same amount of catalyst, the kinetic profile is different suggesting a more complex reaction mechanism.

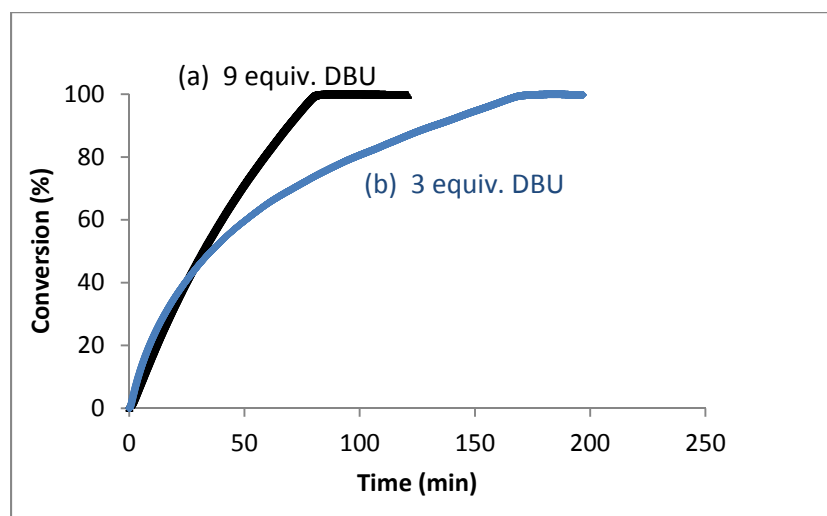

### Reproducibility of kinetic experiments with PdCl<sub>2</sub>.dppf

The reproducibility of the calorimetric experiments was controlled by repeating various experiments at least one time. This was done with different sources or lots of PdCl<sub>2</sub>.dppf ((a) MatrixV09K and Aldrich 0619EU). Reaction with PdCl<sub>2</sub>.dppf (14.6 mg, 0.02 mmol, 2 mol%) and 3 equiv. DBU.



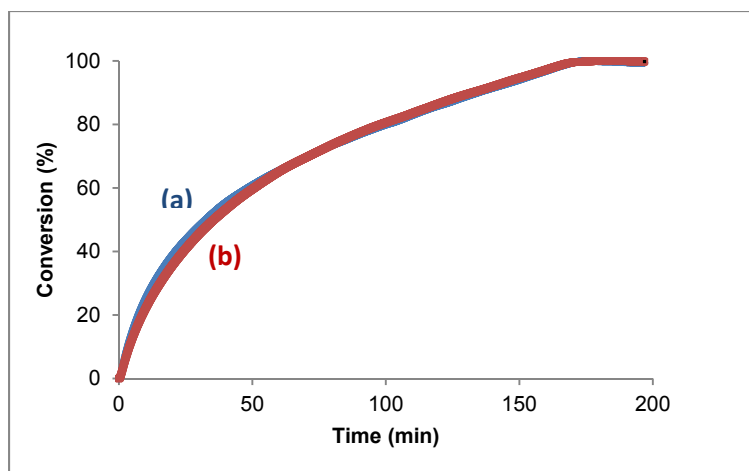

**Catalyst order:** Reaction with PdCl<sub>2</sub>.ddpf (14.6 mg, 0.02 mmol, 2 mol%) vs. PdCl<sub>2</sub>.ddpf (30 mg, 0.04 mmol, 4 mol%). The reaction with 4 mol % showed a zero order kinetic in pyridinium **7b**, the conversion is linear over time and rate is constant over time. With 2 mol%, the initial conversion profile suggested a different profile, however after 30 % of conversion the reaction exhibits a zero order kinetic in substrate **7**. The curves Rate / [cat] overlays for 2 mol % and 4 mol %, indicating that the reaction is first order in catalyst.

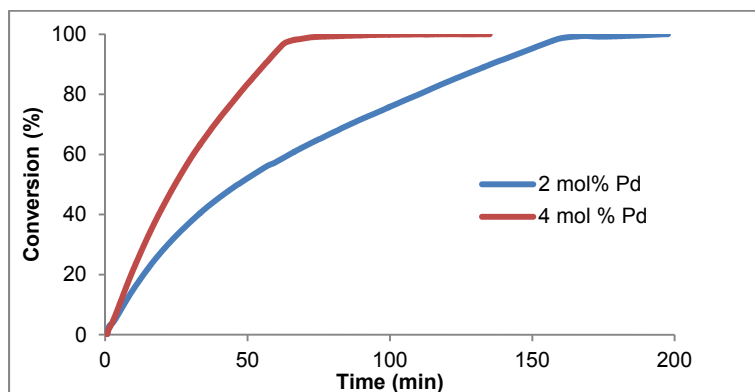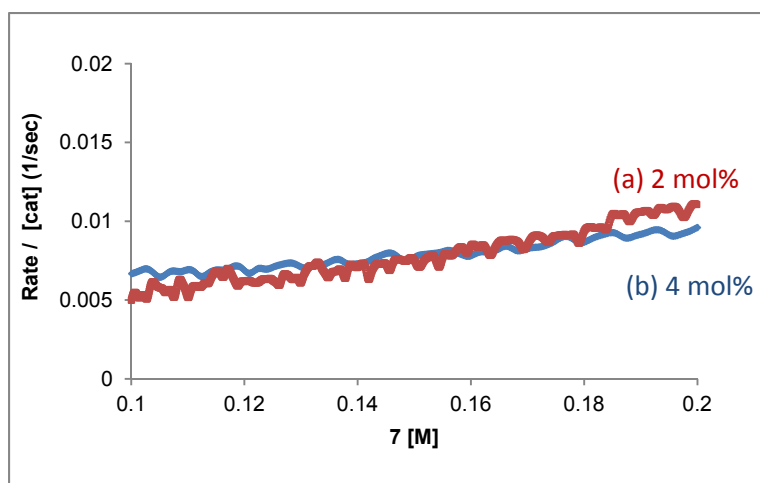

## S1. Details of Computational Studies for the C-H aryative cyclization

Optimizations for Ni species were performed using Gaussian 09<sup>2</sup> software with

- a) spin-unrestricted DFT at the UB3LYP<sup>3</sup>/6-31G(d) level
- and
- b) spin-restricted DFT at the RB3LYP/6-31G(d)/Ni: lanl2dz<sup>4</sup> level in the gas phase.

Optimizations for Pd species were performed using spin-restricted DFT at the RB3LYP/6-31G(d)/Pd: lanl2dz level in the gas phase.

For all species, vibrational frequencies were also computed at the specified level of theory to obtain thermal Gibbs Free Energy corrections (at 298 K) and to characterize the stationary points as transition states (one and only one imaginary frequency) or minima (zero imaginary frequencies). Single point energy calculations were performed on optimized geometries in nitromethane solvent [nitromethane ( $\epsilon=36.562$ )], which resembles the dielectric properties of the solvent used in experiments (dimethylformamide  $\epsilon=37.219$ ) using the SMD<sup>5</sup>-solvation model and UM06<sup>6</sup> functional.

For Pd and Ni species optimized at RB3LYP/6-31G(d)/Ni: lanl2dz level of theory, the 6-311+G(d,p)/lanl2dz basis set was used for single point calculations.

For Ni species optimized at UB3LYP/6-31G(d) level of theory, the 6-311+G(d,p) basis set was used for single point calculations.

## S2. Main computational results

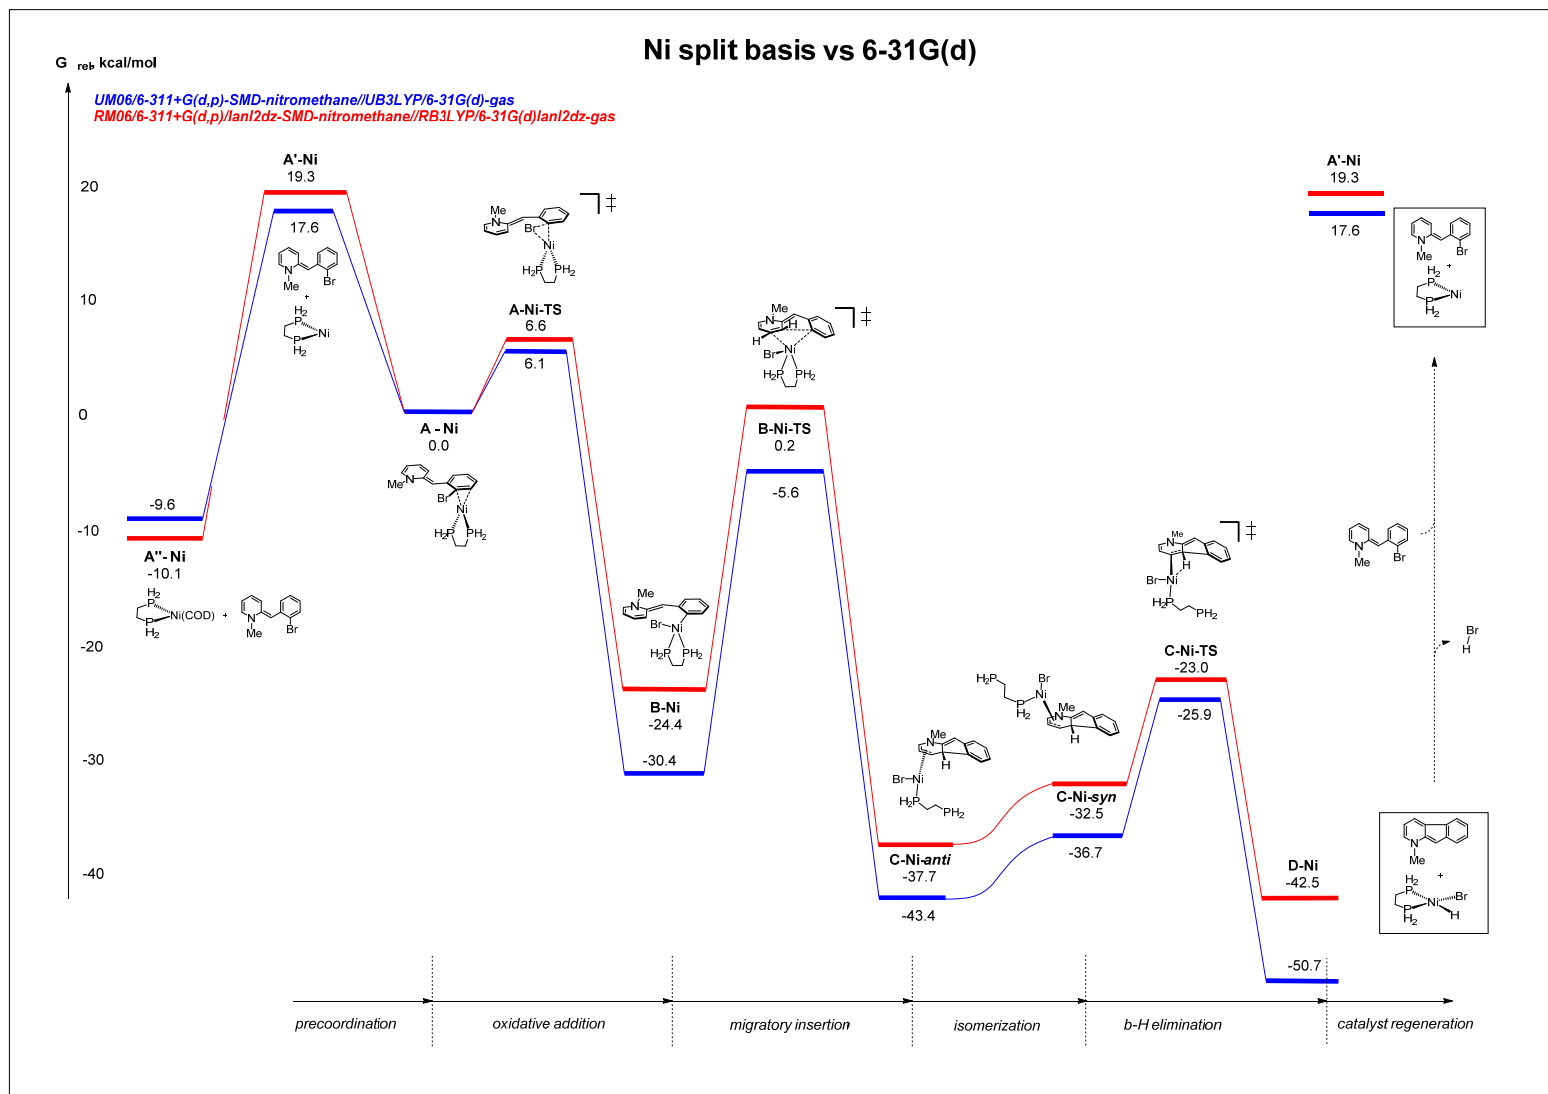

**Scheme S2.1. Comparison of computational methods for Ni system**

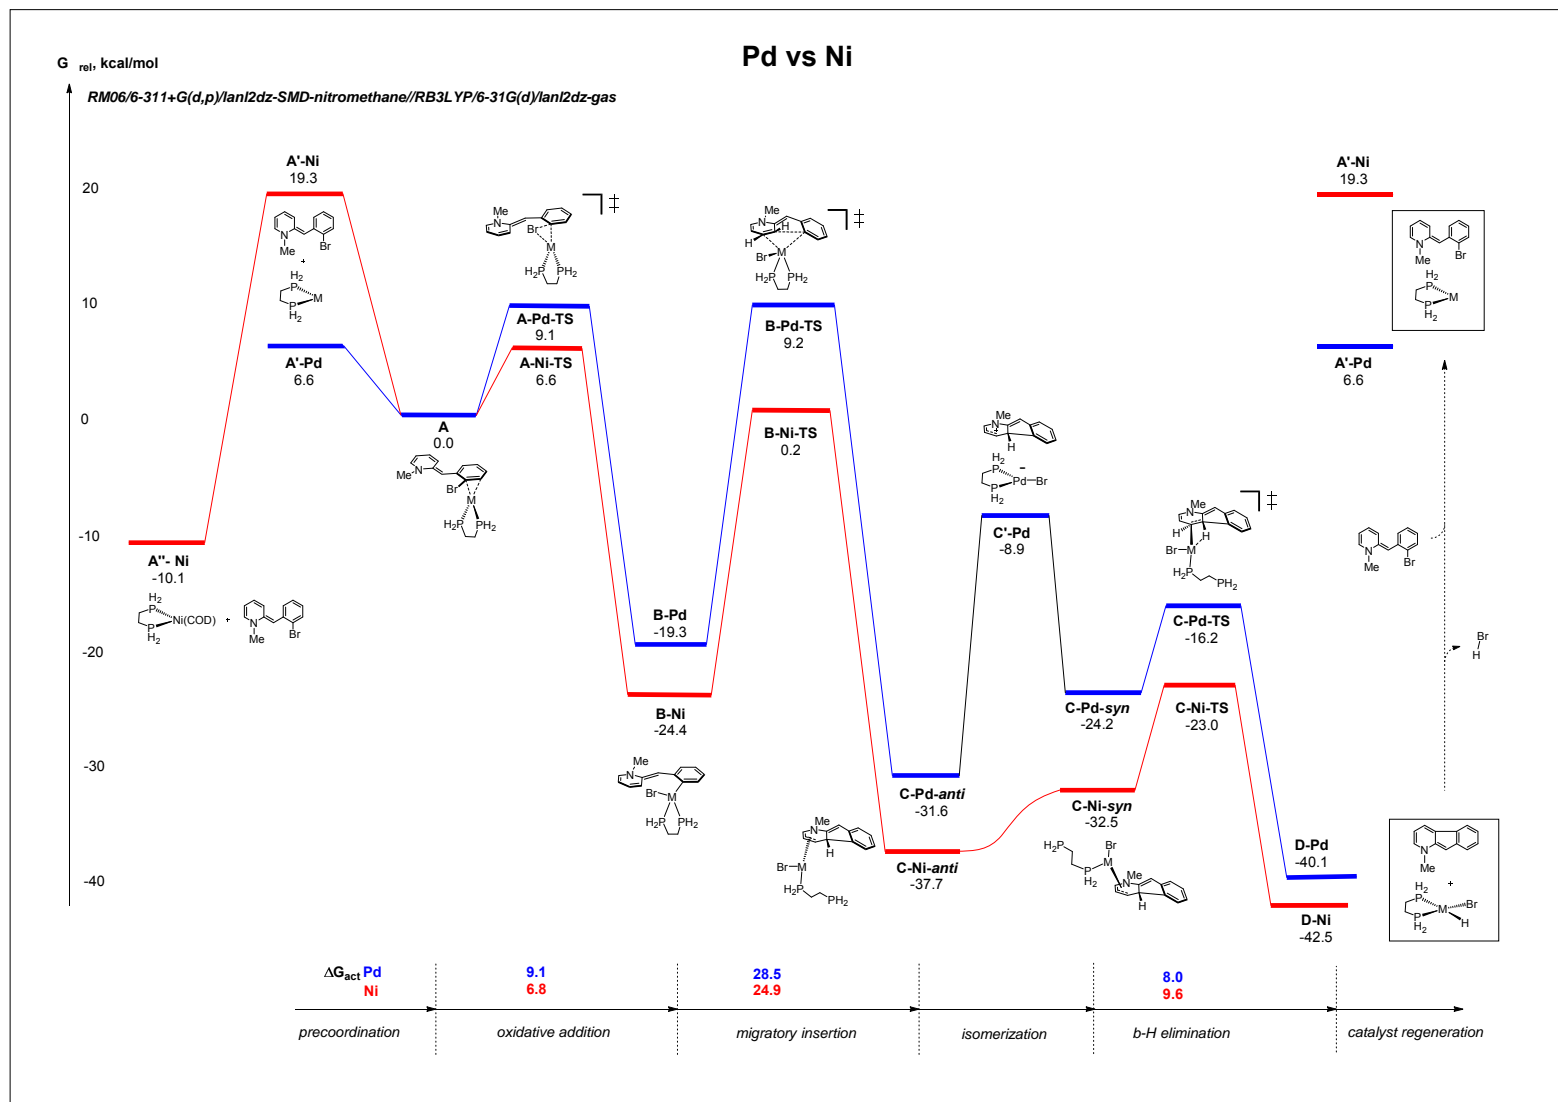

## Scheme S2.2. Energetics profiles for Pd and Ni-catalyzed reaction

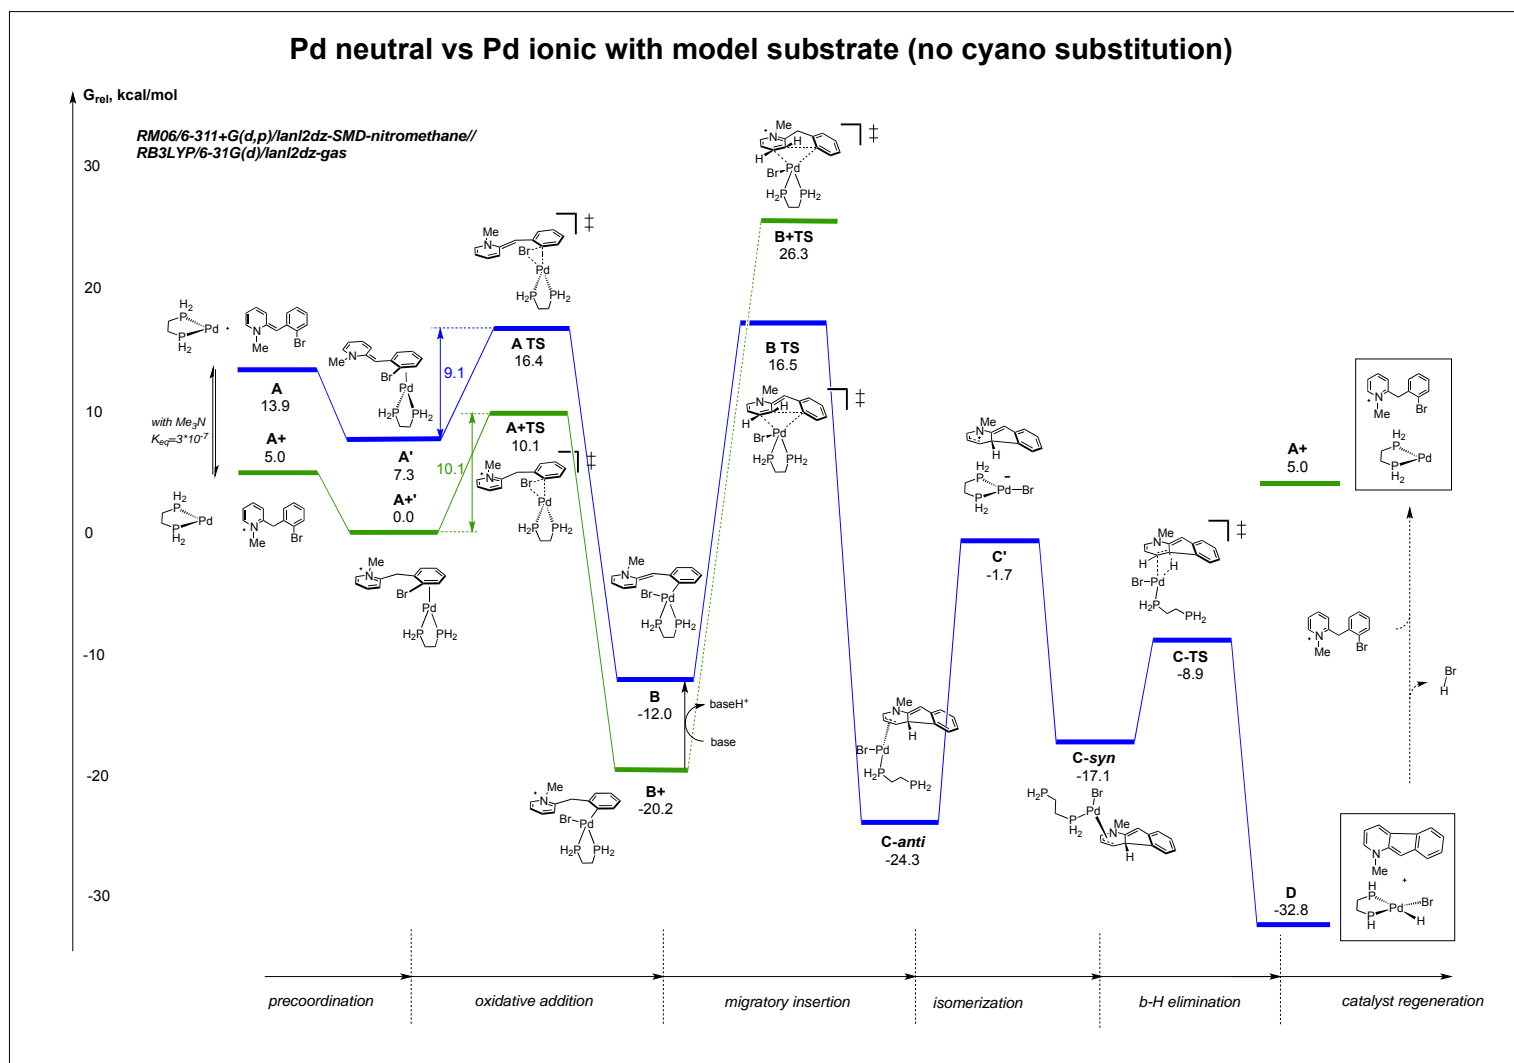

Scheme S2.3. Energetics profiles for Pd-catalyzed reaction of cationic and neutral starting materials using a model substrate

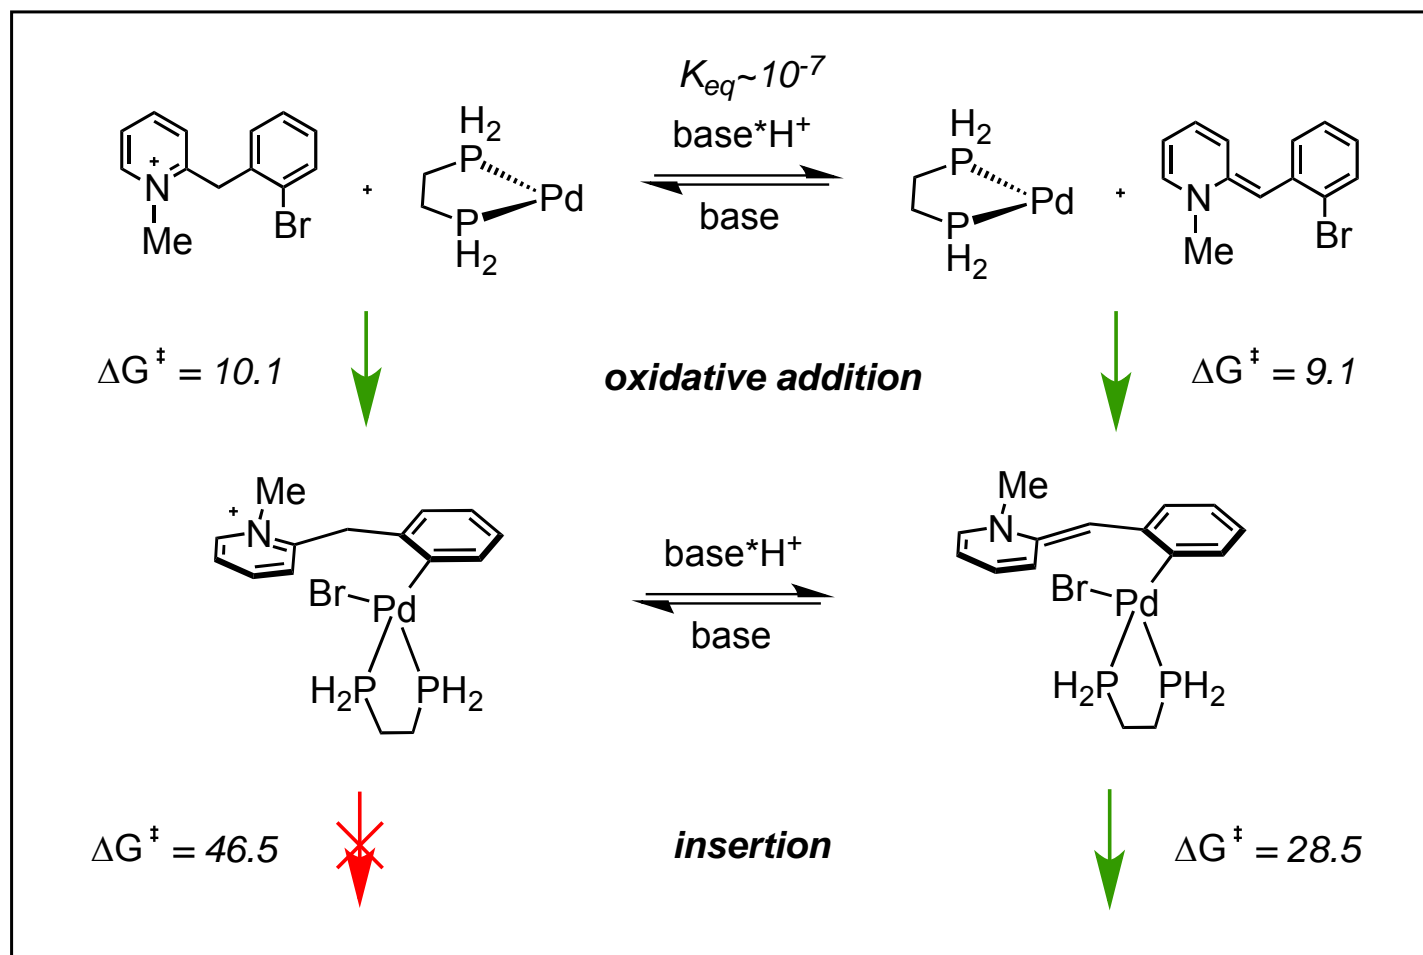

Scheme S2.4. Proposed partition for Pd-catalyzed reaction of model substrate

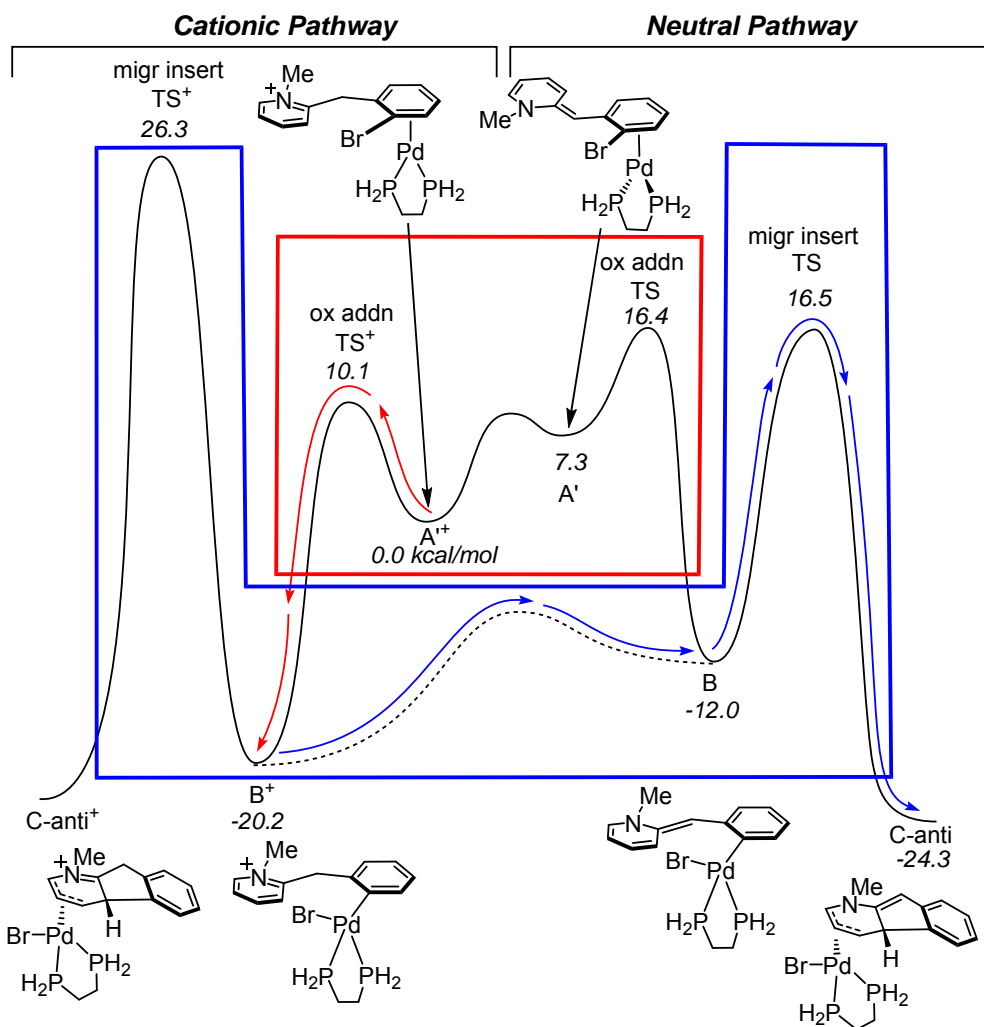

Scheme S2.5. Curtin-Hammett control elements (reaction follows course defined by the arrows) for Pd-catalyzed reaction of model substrate.

### Pd neutral vs Pd ionic with DBU and cyano substituted substrate

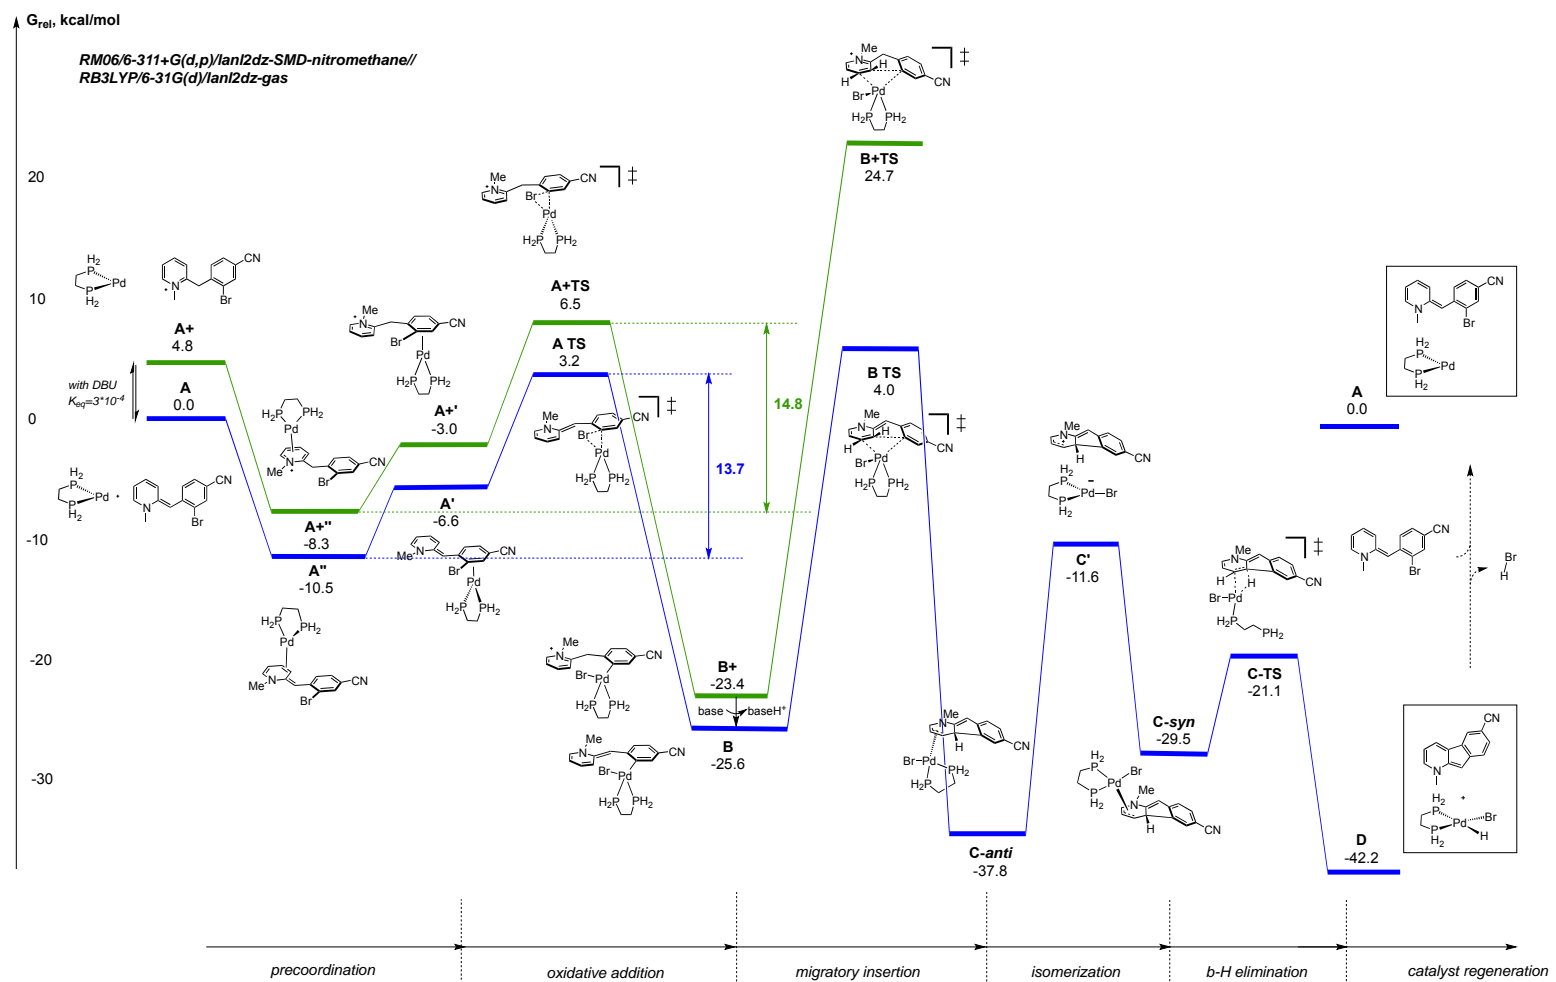

**Scheme S2.6.** Energetics profiles for Pd-catalyzed reaction of cationic and neutral starting materials using DBU and a cyano-substituted substrate.



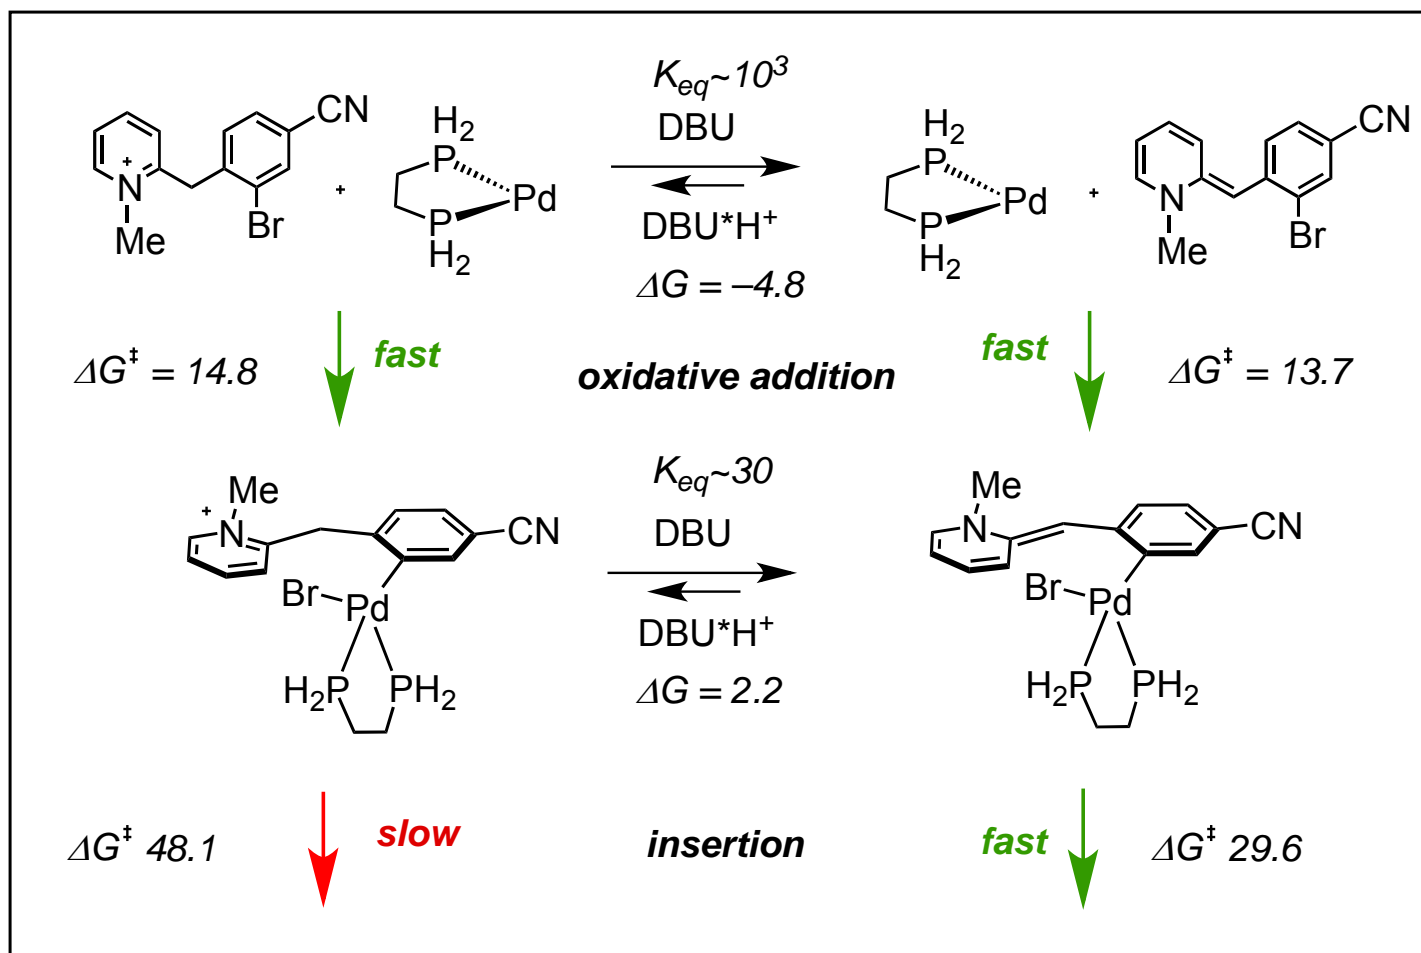

Scheme S2.7. Proposed partition for Pd-catalyzed reaction of DBU and a cyano-substituted substrate.

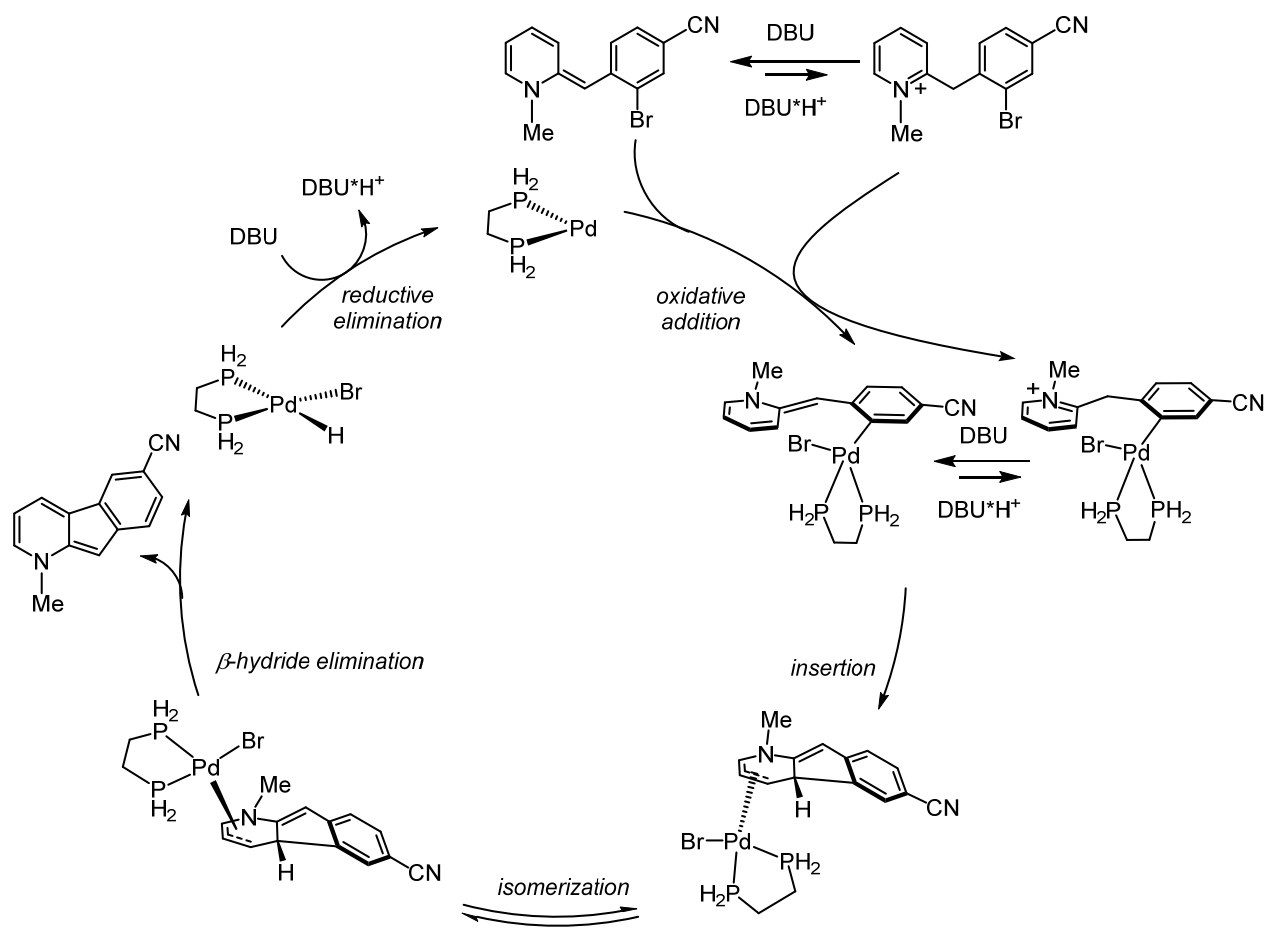

**Scheme S2.8. Catalytic cycle for DBU and a cyano-substituted substrate.**

# Pd neutral vs Pd ionic with DBU and cyano substituted substrate and with dppe vs model ligand

$G_{rel}$ , kcal/mol

*RM06/6-311+G(d,p)/lan12dz-SMD-nitromethane//  
RB3LYP/6-31G(d)/lan12dz-gas*

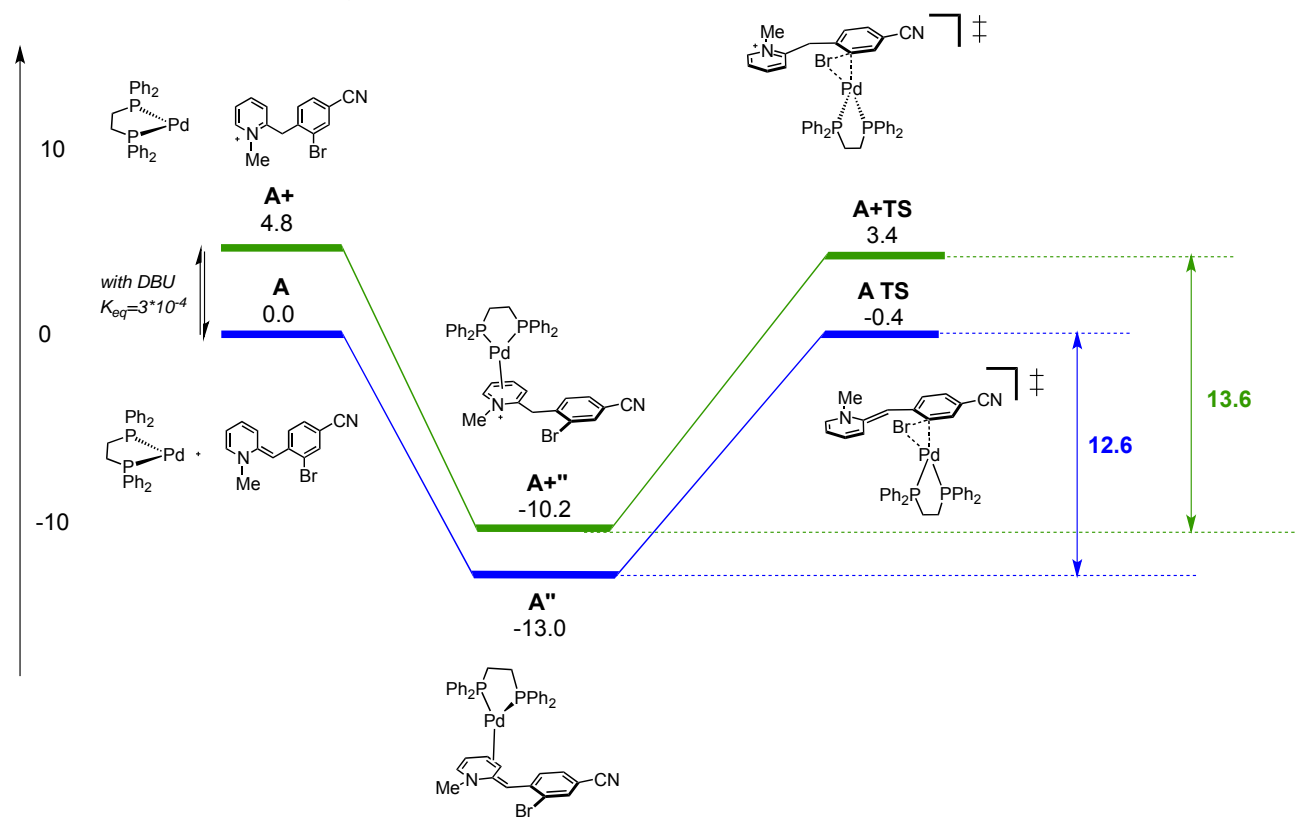

Scheme S2.9. Energetics with dppe in place of model ligand used in Scheme S2.6.

### S3. Brief discussion of the main computational results

Scheme S2.1 provides a comparison of the computational method used in this study (denoted in red) with one that was used in the recently published study of a similar system using diamine ligands (denoted in blue).<sup>7</sup> This scheme establishes that both methods provide very similar energetic profiles. However, the unrestricted method tends to over-stabilize Ni(II) species by ca. 5 kcal/mol. This outcome suggests that the results presented here can be qualitatively compared with the Ni-diamine systems, keeping in mind this consistent difference in free energies of the intermediates.

Scheme S2.2 compares the energetic profiles for Ni-diphosphine and Pd-diphosphine catalyzed reactions. In line with literature precedent,<sup>8</sup> the oxidative addition and migratory insertion paths are lower in energy for the Ni system than for the Pd system. For the Ni-catalyzed reaction, the rate limiting step is the troublesome reduction of the penultimate Ni(II) species back to Ni(0) (ca. 60kcal/mol uphill). For the Pd-catalyzed reaction, corresponding catalyst regeneration is less problematic and oxidative addition or migratory insertion is likely rate limiting. Both steps have low activation energies (ca. 9 kcal/mol) which provide an explanation for the superior reactivity of Pd over Ni in catalyzing this reaction.

Scheme S2.3 looks at the neutral vs cationic pathways for Pd with a model substrate lacking a cyano substituent on the aryl bromide ring system and employing trimethylamine as the base. Similar to previously published results,<sup>7</sup> oxidative addition to the cationic species is lower in energy than the corresponding neutral species. This result arises mainly from the difference in the acidities of the pyridinium and the neutral compound, as the barriers from the cationic or neutral Pd adducts to the oxidative addition transition state are about the same (ca. 10 kcal/mol). The aromaticity of pyridinium renders it more stable than corresponding neutral compound. These energetic differences set up the first of two Curtin-Hammett partitions where the overall oxidative addition barrier is lower from the cationic species. However, the following migratory insertion is very high energy for the cationic species, as aromaticity must be lost. Since the neutral and cationic oxidative addition adducts can interconvert by deprotonation, we now have the second Curtin-Hammett partition, where the reaction barrier is smaller from the higher energy ground state. Scheme S2.4 shows this partitioning and scheme S2.5 summarizes the salient Curtin-Hammett control elements.

Scheme S2.6 looks at the same pathways as Scheme S2.3 except a cyano substituent is present on the aryl bromide ring and DBU is used as the base. Under these conditions, all intermediates and reaction steps are lower from the neutral form of the substrate, although reaction from the charged pyridinium substrate is viable until migratory insertion, which is very high in energy due the reacting double bond be part of a stable aromatic ring system. The corresponding partitioning diagram and catalytic cycle are shown in Scheme S2.6 and S2.7, respectively.

Scheme S2.9 shows the effect of the use of a complete ligand (dppe) in place of the model systems used in all prior calculations. Even though the phenyl groups of the diphosphine are in close proximity to the reacting centers, the relative energetics do not change in a significant way.

## S4. Coordinates and thermochemical data for computed intermediates and transition states

### Ni species from Scheme S2.1

#### A''-Ni: LNi(cod)

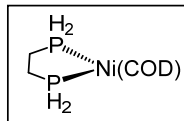

rb3lyp/6-31G(d)/Ni: lanl2dz

Zero-point correction= 0.276982 (Hartree/Particle)  
Thermal correction to Energy= 0.292539  
Thermal correction to Enthalpy= 0.293483  
Thermal correction to Gibbs Free Energy= 0.234910  
Sum of electronic and zero-point Energies= -1244.809895  
Sum of electronic and thermal Energies= -1244.794338  
Sum of electronic and thermal Enthalpies= -1244.793394  
Sum of electronic and thermal Free Energies= -1244.851967  
Electronic energy (RM06) -1244.91825008

|    |             |             |             |
|----|-------------|-------------|-------------|
| C  | 3.28686500  | 0.73215200  | 0.23467100  |
| H  | 4.13250000  | 1.28460600  | -0.18898000 |
| H  | 3.37977800  | 0.77702500  | 1.32689100  |
| C  | 3.28747800  | -0.73181600 | -0.23287500 |
| H  | 3.38242000  | -0.77665500 | -1.32492400 |
| H  | 4.13249200  | -1.28405800 | 0.19228100  |
| P  | 1.63735400  | 1.54259100  | -0.19047100 |
| P  | 1.63742900  | -1.54283100 | 0.18931800  |
| H  | 1.98738100  | 2.15363300  | -1.43281800 |
| H  | 1.78981300  | 2.74094500  | 0.56808600  |
| H  | 1.79103600  | -2.74029400 | -0.57042200 |
| H  | 1.98583500  | -2.15531500 | 1.43140800  |
| C  | -2.15017100 | -1.80674900 | -0.64893500 |
| H  | -3.06947400 | -2.05052100 | -1.20848100 |
| H  | -1.59263100 | -2.74767700 | -0.56475900 |
| C  | -2.52796700 | -1.32878900 | 0.77718400  |
| H  | -3.44495100 | -0.73092200 | 0.74060900  |
| H  | -2.77625700 | -2.20890800 | 1.38354600  |
| C  | -1.43042900 | -0.53923000 | 1.47715800  |
| H  | -0.88661700 | -1.06785600 | 2.25742500  |
| C  | -1.28691800 | -0.83451800 | -1.43255900 |
| H  | -0.66023500 | -1.29285100 | -2.19639000 |
| C  | -1.43145600 | 0.53929300  | -1.47685900 |
| H  | -0.88819200 | 1.06770400  | -2.25765400 |
| C  | -1.28553200 | 0.83452500  | 1.43279400  |
| H  | -0.65808700 | 1.29266100  | 2.19612100  |
| C  | -2.52816900 | 1.32920700  | -0.77597900 |
| H  | -2.77667600 | 2.20941400  | -1.38212200 |
| H  | -3.44531800 | 0.73163900  | -0.73864600 |
| C  | -2.14905100 | 1.80704500  | 0.64983100  |
| H  | -3.06780500 | 2.05119200  | 1.21011500  |
| H  | -1.59120600 | 2.74774800  | 0.56517600  |
| Ni | 0.08737700  | -0.00016500 | -0.00056300 |

## A''- Ni: Starting material

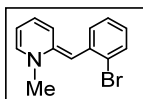

rb3lyp/6-31G(d)/Ni: lanl2dz

Zero-point correction= 0.217074 (Hartree/Particle)  
Thermal correction to Energy= 0.230064  
Thermal correction to Enthalpy= 0.231009  
Thermal correction to Gibbs Free Energy= 0.176015  
Sum of electronic and zero-point Energies= -3128.820128  
Sum of electronic and thermal Energies= -3128.807138  
Sum of electronic and thermal Enthalpies= -3128.806194  
Sum of electronic and thermal Free Energies= -3128.861187  
Electronic energy (RM06) -3131.06727480

|    |             |             |             |
|----|-------------|-------------|-------------|
| C  | -3.12567100 | 1.01668700  | -0.06071500 |
| C  | -3.00854400 | 2.38585700  | 0.17791100  |
| C  | -1.75828000 | 2.91361100  | 0.50464400  |
| C  | -0.64398600 | 2.08458900  | 0.58081800  |
| C  | -0.70814900 | 0.69651200  | 0.31076200  |
| C  | -1.99845600 | 0.20408500  | 0.00633100  |
| H  | -4.08642900 | 0.57686500  | -0.30577400 |
| H  | -3.88612400 | 3.02315800  | 0.12018000  |
| H  | -1.65240400 | 3.97299500  | 0.72352600  |
| H  | 0.30542000  | 2.50446500  | 0.89713600  |
| C  | 0.44262100  | -0.19176200 | 0.41561400  |
| H  | 0.20067500  | -1.19366800 | 0.74243100  |
| C  | 1.74854500  | 0.09496700  | 0.09204100  |
| C  | 2.20454400  | 1.28964000  | -0.59102900 |
| C  | 3.51218200  | 1.50929600  | -0.89139200 |
| H  | 1.44728500  | 1.99748100  | -0.90233800 |
| C  | 4.09058700  | -0.59885200 | 0.06745800  |
| C  | 4.50810600  | 0.54499000  | -0.53525500 |
| H  | 4.77679000  | -1.39150000 | 0.34455400  |
| H  | 5.55871200  | 0.69573200  | -0.75100400 |
| Br | -2.25599300 | -1.67129700 | -0.34622800 |
| C  | 2.41880300  | -2.10180300 | 1.01271300  |
| H  | 1.75459200  | -2.69264500 | 0.37114500  |
| H  | 3.32585000  | -2.67568300 | 1.20819900  |
| H  | 1.90120600  | -1.91062000 | 1.95992000  |
| N  | 2.77437000  | -0.84411000 | 0.37088900  |
| H  | 3.79977000  | 2.41069000  | -1.42561100 |

## A''-Ni

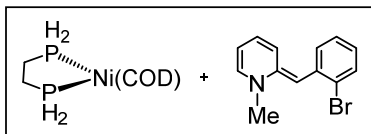

ub3lyp/6-31G(d)

Zero-point correction= 0.495950 (Hartree/Particle)  
Thermal correction to Energy= 0.526286  
Thermal correction to Enthalpy= 0.527230  
Thermal correction to Gibbs Free Energy= 0.417448  
Sum of electronic and zero-point Energies= -5712.485445  
Sum of electronic and thermal Energies= -5712.455110

Sum of electronic and thermal Enthalpies= -5712.454165  
 Sum of electronic and thermal Free Energies= -5712.563947  
 Electronic energy (UM06) -5714.86571616

|    |              |             |             |
|----|--------------|-------------|-------------|
| C  | 25.72303100  | -3.07589200 | 1.19535600  |
| C  | 26.67141900  | -3.03892100 | 2.21731500  |
| C  | 27.45749700  | -1.89596900 | 2.37326300  |
| C  | 27.28883900  | -0.80652800 | 1.52505800  |
| C  | 26.31536600  | -0.78539500 | 0.49762600  |
| C  | 25.55808100  | -1.97227100 | 0.36444400  |
| H  | 25.10527500  | -3.95453900 | 1.04383500  |
| H  | 26.79783400  | -3.89721900 | 2.87074000  |
| H  | 28.22185100  | -1.85936200 | 3.14516600  |
| H  | 27.95191200  | 0.04693800  | 1.62359800  |
| C  | 26.14852600  | 0.33433600  | -0.42057400 |
| H  | 25.84221200  | 0.04914600  | -1.41756100 |
| C  | 26.27932700  | 1.67332000  | -0.13348000 |
| C  | 26.43080300  | 2.23978600  | 1.19233600  |
| C  | 26.54059200  | 3.57723100  | 1.41051500  |
| H  | 26.40697000  | 1.55079000  | 2.02668600  |
| C  | 26.33069400  | 3.98091200  | -0.93308100 |
| C  | 26.51074900  | 4.49425800  | 0.31190000  |
| H  | 26.27013400  | 4.60856100  | -1.81531800 |
| H  | 26.60547300  | 5.56401100  | 0.45229300  |
| C  | -27.12507600 | 1.75285800  | 1.51957200  |
| H  | -27.41668100 | 2.26952100  | 2.44002100  |
| H  | -27.49972800 | 2.34408100  | 0.67504200  |
| C  | -27.69600700 | 0.32891100  | 1.46052400  |
| H  | -27.50548200 | -0.19301900 | 2.40627800  |
| H  | -28.77879000 | 0.33192900  | 1.29695900  |
| P  | -25.25361200 | 1.67270000  | 1.32488900  |
| P  | -26.78912700 | -0.64100100 | 0.12491600  |
| Br | 24.22009300  | -2.11235500 | -1.01265000 |
| C  | 26.01773900  | 2.17523600  | -2.54218600 |
| H  | 25.04894600  | 1.67423300  | -2.65354000 |
| H  | 26.05468000  | 3.03060200  | -3.21843800 |
| H  | 26.80590900  | 1.46435600  | -2.81606800 |
| N  | 26.20945100  | 2.63488900  | -1.17400600 |
| H  | -24.86385500 | 1.72377500  | 2.69767200  |
| H  | -24.99914300 | 3.05027600  | 1.06789000  |
| H  | -27.21623400 | -1.95362000 | 0.47581400  |
| H  | -27.71134000 | -0.48922600 | -0.95450400 |
| H  | 26.62781500  | 3.95365600  | 2.42602600  |
| C  | -23.57821600 | -2.45618300 | -0.93414300 |
| H  | -22.72118100 | -3.15013700 | -0.92378100 |
| H  | -24.47204500 | -3.08550100 | -1.03106500 |
| C  | -23.49405500 | -1.52234400 | -2.16792400 |
| H  | -22.44778000 | -1.30533200 | -2.41031200 |
| H  | -23.89604300 | -2.04777700 | -3.04275100 |
| C  | -24.26222100 | -0.21846300 | -1.97031300 |
| H  | -25.16135800 | -0.11641800 | -2.57598900 |
| C  | -23.68577200 | -1.70393900 | 0.38178500  |
| H  | -24.14284300 | -2.27281000 | 1.19117800  |
| C  | -22.91296500 | -0.59830800 | 0.74139900  |
| H  | -22.84873400 | -0.37989300 | 1.80624200  |
| C  | -23.69982500 | 0.96758500  | -1.49405300 |
| H  | -24.18904700 | 1.89773300  | -1.78234100 |
| C  | -21.78466400 | -0.02019100 | -0.10796600 |
| H  | -20.99208600 | 0.35373500  | 0.55165400  |
| H  | -21.32186000 | -0.81535900 | -0.70313300 |
| C  | -22.26268900 | 1.13023600  | -1.02901700 |

|    |              |            |             |
|----|--------------|------------|-------------|
| H  | -21.57943900 | 1.23728800 | -1.88811600 |
| H  | -22.19628200 | 2.07521800 | -0.47496500 |
| Ni | -24.74765800 | 0.03376800 | 0.02408500  |

### A'-Ni: LNi

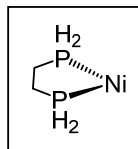

rb3lyp/6-31G(d)/Ni: lanl2dz

Zero-point correction= 0.094519 (Hartree/Particle)  
 Thermal correction to Energy= 0.101790  
 Thermal correction to Enthalpy= 0.102735  
 Thermal correction to Gibbs Free Energy= 0.062638  
 Sum of electronic and zero-point Energies= -932.909826  
 Sum of electronic and thermal Energies= -932.902554  
 Sum of electronic and thermal Enthalpies= -932.901610  
 Sum of electronic and thermal Free Energies= -932.941707  
 Electronic energy (RM06) -932.98756522

|    |             |             |             |
|----|-------------|-------------|-------------|
| C  | 0.70643800  | -1.72400000 | 0.30881800  |
| H  | 1.27786200  | -2.59418000 | -0.03469500 |
| H  | 0.63570000  | -1.79124000 | 1.40144500  |
| C  | -0.70643600 | -1.72400100 | -0.30881700 |
| H  | -0.63569800 | -1.79124100 | -1.40144500 |
| H  | -1.27785900 | -2.59418100 | 0.03469300  |
| P  | 1.62866200  | -0.11018100 | -0.05679800 |
| P  | -1.62866300 | -0.11018300 | 0.05679800  |
| H  | 2.28238700  | -0.47837000 | -1.27057100 |
| H  | 2.76920700  | -0.34297700 | 0.76989000  |
| H  | -2.76920700 | -0.34298000 | -0.76988900 |
| H  | -2.28238600 | -0.47837300 | 1.27057300  |
| Ni | -0.00000100 | 1.22882100  | 0.00000000  |

### A'-Ni: COD

rb3lyp/6-31G(d)/Ni: lanl2dz

Zero-point correction= 0.181147 (Hartree/Particle)  
 Thermal correction to Energy= 0.188572  
 Thermal correction to Enthalpy= 0.189516  
 Thermal correction to Gibbs Free Energy= 0.149621  
 Sum of electronic and zero-point Energies= -311.849253  
 Sum of electronic and thermal Energies= -311.841829  
 Sum of electronic and thermal Enthalpies= -311.840884  
 Sum of electronic and thermal Free Energies= -311.880779  
 Electronic energy (RM06) -311.86128629

|   |             |             |             |
|---|-------------|-------------|-------------|
| C | -1.08303000 | 1.10789900  | 0.66507000  |
| H | -0.66660000 | 0.72449700  | 1.59997600  |
| H | -1.77130600 | 1.91037700  | 0.95870600  |
| C | -1.92326800 | 0.01155200  | -0.02475300 |
| H | -2.74176500 | -0.28214200 | 0.65244600  |
| H | -2.42443100 | 0.45634200  | -0.89738800 |
| C | -1.21563000 | -1.23582300 | -0.49481300 |
| H | -1.82281600 | -1.84174400 | -1.16973500 |
| C | -0.00728300 | 1.70477100  | -0.21768000 |
| H | -0.28995600 | 2.63556700  | -0.71064400 |
| C | 1.21562000  | 1.23582600  | -0.49482200 |



|   |            |             |             |
|---|------------|-------------|-------------|
| H | 1.82279000 | 1.84174900  | -1.16975700 |
| C | 0.00727900 | -1.70477000 | -0.21769900 |
| H | 0.28993800 | -2.63556600 | -0.71067100 |
| C | 1.92327000 | -0.01154600 | -0.02477200 |
| H | 2.42444200 | -0.45632300 | -0.89740900 |
| H | 2.74176100 | 0.28214900  | 0.65243500  |
| C | 1.08304100 | -1.10790700 | 0.66504000  |
| H | 0.66662300 | -0.72452200 | 1.59995800  |
| H | 1.77132300 | -1.91038900 | 0.95865300  |

ub3lyp/6-31G(d)

Zero-point correction= 0.181147 (Hartree/Particle)  
 Thermal correction to Energy= 0.188572  
 Thermal correction to Enthalpy= 0.189516  
 Thermal correction to Gibbs Free Energy= 0.149621  
 Sum of electronic and zero-point Energies= -311.849253  
 Sum of electronic and thermal Energies= -311.841829  
 Sum of electronic and thermal Enthalpies= -311.840884  
 Sum of electronic and thermal Free Energies= -311.880779  
 Electronic energy (UM06) -311.86128629

|   |             |             |             |
|---|-------------|-------------|-------------|
| C | 1.08303000  | -1.10789900 | 0.66507000  |
| H | 0.66660000  | -0.72449700 | 1.59997600  |
| H | 1.77130600  | -1.91037600 | 0.95870600  |
| C | 1.92326800  | -0.01155100 | -0.02475300 |
| H | 2.74176500  | 0.28214300  | 0.65244600  |
| H | 2.42443100  | -0.45634100 | -0.89738800 |
| C | 1.21563000  | 1.23582300  | -0.49481300 |
| H | 1.82281500  | 1.84174500  | -1.16973500 |
| C | 0.00728300  | -1.70477100 | -0.21768000 |
| H | 0.28995700  | -2.63556700 | -0.71064400 |
| C | -1.21562000 | -1.23582600 | -0.49482200 |
| H | -1.82279000 | -1.84174900 | -1.16975700 |
| C | -0.00727900 | 1.70477000  | -0.21769900 |
| H | -0.28993900 | 2.63556600  | -0.71067100 |
| C | -1.92327000 | 0.01154600  | -0.02477200 |
| H | -2.42444200 | 0.45632300  | -0.89740900 |
| H | -2.74176100 | -0.28215000 | 0.65243500  |
| C | -1.08304100 | 1.10790700  | 0.66504000  |
| H | -0.66662300 | 0.72452200  | 1.59995800  |
| H | -1.77132400 | 1.91038900  | 0.95865300  |

### A'-Ni

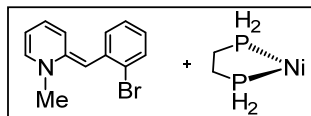

ub3lyp/6-31G(d)

Zero-point correction= 0.312523 (Hartree/Particle)  
 Thermal correction to Energy= 0.335154  
 Thermal correction to Enthalpy= 0.336098  
 Thermal correction to Gibbs Free Energy= 0.241218  
 Sum of electronic and zero-point Energies= -5400.530669  
 Sum of electronic and thermal Energies= -5400.508038  
 Sum of electronic and thermal Enthalpies= -5400.507094  
 Sum of electronic and thermal Free Energies= -5400.601974  
 Electronic energy (UM06) -5402.93434952

|   |             |             |            |
|---|-------------|-------------|------------|
| C | 14.03510400 | -3.19945500 | 0.80699100 |
| C | 14.98770700 | -3.23353400 | 1.82518700 |

|    |              |             |             |
|----|--------------|-------------|-------------|
| C  | 15.72051700  | -2.07978200 | 2.10883800  |
| C  | 15.49573900  | -0.91048200 | 1.38970000  |
| C  | 14.51567200  | -0.81943800 | 0.37258300  |
| C  | 13.81328700  | -2.01771600 | 0.10714200  |
| H  | 13.45816100  | -4.08360900 | 0.55775400  |
| H  | 15.15862500  | -4.15337100 | 2.37683800  |
| H  | 16.48729800  | -2.09484000 | 2.87904400  |
| H  | 16.11813400  | -0.04282800 | 1.58382300  |
| C  | 14.29001200  | 0.38792400  | -0.41248900 |
| H  | 13.99526500  | 0.20279400  | -1.43633100 |
| C  | 14.35081900  | 1.68973300  | 0.02755900  |
| C  | 14.47601700  | 2.10582200  | 1.41071000  |
| C  | 14.51072900  | 3.41283100  | 1.78331100  |
| H  | 14.49400500  | 1.32453300  | 2.15948600  |
| C  | 14.27147300  | 4.07394000  | -0.49808700 |
| C  | 14.42539400  | 4.44833200  | 0.79879700  |
| H  | 14.17362300  | 4.79541000  | -1.30172500 |
| H  | 14.46005400  | 5.49812000  | 1.06300200  |
| C  | -25.34738100 | 0.39982000  | 0.72553900  |
| H  | -26.20956400 | 0.10426400  | 1.33425900  |
| H  | -25.42039300 | 1.48240500  | 0.56291600  |
| C  | -25.34738900 | -0.33174900 | -0.63058400 |
| H  | -25.41912900 | -1.41441400 | -0.46792700 |
| H  | -26.21025400 | -0.03712700 | -1.23878900 |
| P  | -23.72166700 | 0.11997600  | 1.64527700  |
| P  | -23.72252600 | -0.05010100 | -1.55128500 |
| Br | 12.47203500  | -2.06168900 | -1.27369200 |
| C  | 14.05483800  | 2.45315100  | -2.30735900 |
| H  | 13.11352600  | 1.91798200  | -2.47939900 |
| H  | 14.04458500  | 3.38200500  | -2.87961700 |
| H  | 14.87863300  | 1.82153600  | -2.65954800 |
| N  | 14.22604300  | 2.76033400  | -0.89446300 |
| H  | -24.07531500 | -1.00695000 | 2.44331300  |
| H  | -23.89750900 | 1.10868200  | 2.65687200  |
| H  | -23.89783800 | -1.03899800 | -2.56278300 |
| H  | -24.07792600 | 1.07642600  | -2.34911600 |
| Ni | -22.48965200 | 0.03562000  | 0.04662500  |
| H  | 14.58041800  | 3.67289400  | 2.83596900  |

## A-Ni

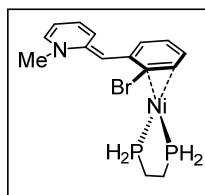

rb3lyp/6-31G(d)/Ni: lanl2dz

Zero-point correction= 0.311596 (Hartree/Particle)  
 Thermal correction to Energy= 0.333824  
 Thermal correction to Enthalpy= 0.334768  
 Thermal correction to Gibbs Free Energy= 0.257966  
 Sum of electronic and zero-point Energies= -4061.450103  
 Sum of electronic and thermal Energies= -4061.427875  
 Sum of electronic and thermal Enthalpies= -4061.426931  
 Sum of electronic and thermal Free Energies= -4061.503732  
 Electronic energy (RM06) -4064.10486223

|   |             |             |            |
|---|-------------|-------------|------------|
| C | -1.64313900 | -1.69778700 | 1.21082700 |
| C | -1.52820400 | -1.51473000 | 2.62237600 |

|    |             |             |             |
|----|-------------|-------------|-------------|
| C  | -0.33730000 | -1.09200400 | 3.16816900  |
| C  | 0.79036500  | -0.85056900 | 2.34712800  |
| C  | 0.76487900  | -1.00215300 | 0.96094500  |
| C  | -0.50561800 | -1.41162900 | 0.38893300  |
| H  | -2.45103200 | -2.30944600 | 0.82102700  |
| H  | -2.37728600 | -1.75960200 | 3.25571700  |
| H  | -0.23843500 | -0.97938200 | 4.24494000  |
| H  | 1.73024600  | -0.58363700 | 2.82031000  |
| C  | 1.92673900  | -0.79697200 | 0.10617000  |
| H  | 1.96557800  | -1.44974800 | -0.75522900 |
| C  | 2.91092500  | 0.15464900  | 0.24909300  |
| C  | 2.88711400  | 1.25654600  | 1.19241000  |
| C  | 3.88002900  | 2.18228800  | 1.26692000  |
| H  | 2.01089800  | 1.33952400  | 1.82238900  |
| C  | 5.04248300  | 1.08346400  | -0.50759500 |
| C  | 5.01843100  | 2.09387500  | 0.40041100  |
| H  | 5.85726300  | 0.95828700  | -1.21242700 |
| H  | 5.83247200  | 2.80706400  | 0.44454300  |
| C  | -2.43103700 | 2.85413000  | -1.48585300 |
| H  | -2.10142700 | 3.87208800  | -1.71850700 |
| H  | -2.89763800 | 2.44665900  | -2.39168900 |
| C  | -3.44700400 | 2.85420400  | -0.32954700 |
| H  | -3.03914500 | 3.40386400  | 0.52812200  |
| H  | -4.37874300 | 3.34956400  | -0.62230000 |
| P  | -0.97973500 | 1.71869300  | -1.07933700 |
| P  | -3.75016000 | 1.08992200  | 0.26720500  |
| Br | -0.51129800 | -2.31298300 | -1.38112300 |
| C  | 4.15765600  | -0.90526300 | -1.60884800 |
| H  | 3.34523100  | -0.83612000 | -2.34253400 |
| H  | 5.11302100  | -0.80858600 | -2.12748000 |
| H  | 4.10315900  | -1.89113500 | -1.13225800 |
| N  | 4.04570400  | 0.14409700  | -0.60697300 |
| H  | -0.09721300 | 2.65913400  | -0.47926900 |
| H  | -0.33998200 | 1.70774300  | -2.34812500 |
| H  | -4.54980500 | 1.37332600  | 1.40907800  |
| H  | -4.83762400 | 0.73433400  | -0.57970000 |
| Ni | -1.81591000 | 0.05466900  | 0.11678700  |
| H  | 3.80196800  | 3.00353700  | 1.97422700  |

ub3lyp/6-31G(d)

Zero-point correction= 0.312701 (Hartree/Particle)  
 Thermal correction to Energy= 0.334454  
 Thermal correction to Enthalpy= 0.335398  
 Thermal correction to Gibbs Free Energy= 0.259290  
 Sum of electronic and zero-point Energies= -5400.607831  
 Sum of electronic and thermal Energies= -5400.586078  
 Sum of electronic and thermal Enthalpies= -5400.585134  
 Sum of electronic and thermal Free Energies= -5400.661242  
 Electronic energy (UM06) -5402.98051554

|   |             |             |            |
|---|-------------|-------------|------------|
| C | -1.67694600 | -1.46849800 | 1.32576000 |
| C | -1.52266800 | -1.21592800 | 2.73092000 |
| C | -0.31990500 | -0.78733700 | 3.23423000 |
| C | 0.81496800  | -0.63604500 | 2.39334700 |
| C | 0.77330100  | -0.86650700 | 1.02350500 |
| C | -0.52710600 | -1.22179200 | 0.48655500 |
| H | -2.40234600 | -2.22600700 | 1.03894500 |
| H | -2.35550200 | -1.42601800 | 3.39835700 |
| H | -0.20445200 | -0.61886500 | 4.30221900 |
| H | 1.76622100  | -0.37841300 | 2.84876600 |
| C | 1.92485100  | -0.76091000 | 0.13860100 |

|    |             |             |             |
|----|-------------|-------------|-------------|
| H  | 1.90840600  | -1.45372600 | -0.69205400 |
| C  | 2.96622100  | 0.13471400  | 0.21810100  |
| C  | 3.02767300  | 1.28011600  | 1.10544600  |
| C  | 4.07612700  | 2.14486600  | 1.11848100  |
| H  | 2.16846100  | 1.44905300  | 1.74177100  |
| C  | 5.13428100  | 0.89399700  | -0.61966200 |
| C  | 5.19040500  | 1.94434900  | 0.23983900  |
| H  | 5.92573900  | 0.68576200  | -1.33149000 |
| H  | 6.04794400  | 2.60608700  | 0.23716100  |
| C  | -2.38079000 | 2.90183400  | -1.37787600 |
| H  | -2.00525700 | 3.92783100  | -1.44727000 |
| H  | -2.80754300 | 2.64071300  | -2.35443000 |
| C  | -3.45820100 | 2.77240000  | -0.28727600 |
| H  | -3.09534000 | 3.20789700  | 0.65206100  |
| H  | -4.37711300 | 3.29992500  | -0.56306200 |
| P  | -0.99885400 | 1.66156200  | -1.05132300 |
| P  | -3.77481600 | 0.95043500  | 0.06840400  |
| Br | -0.59204900 | -2.28836500 | -1.22144800 |
| C  | 4.10555400  | -1.08193900 | -1.61225800 |
| H  | 3.28502000  | -0.99302700 | -2.33464500 |
| H  | 5.05484300  | -1.07029400 | -2.15032400 |
| H  | 3.99759700  | -2.04010000 | -1.09058600 |
| N  | 4.07983800  | 0.01556000  | -0.65760800 |
| H  | -0.07506800 | 2.49081000  | -0.36324400 |
| H  | -0.35625100 | 1.69126600  | -2.31749800 |
| H  | -4.58274100 | 1.07509600  | 1.22801100  |
| H  | -4.82544900 | 0.69119100  | -0.85626200 |
| Ni | -1.86168200 | 0.00148200  | -0.01213000 |
| H  | 4.06124500  | 3.00329900  | 1.78463700  |

## A-Ni-TS

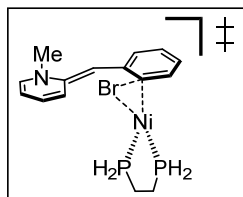

rb3lyp/6-31G(d)/Ni: lanl2dz

Zero-point correction= 0.310944 (Hartree/Particle)

Thermal correction to Energy= 0.332854

Thermal correction to Enthalpy= 0.333798

Thermal correction to Gibbs Free Energy= 0.257415

Sum of electronic and zero-point Energies= -4061.445060

Sum of electronic and thermal Energies= -4061.423150

Sum of electronic and thermal Enthalpies= -4061.422206

Sum of electronic and thermal Free Energies= -4061.498589

Electronic energy (RM06) -4064.09378277

|   |             |             |             |
|---|-------------|-------------|-------------|
| C | -1.50556100 | -2.10770300 | 1.01184600  |
| C | -1.15005100 | -2.56845000 | 2.29527900  |
| C | 0.16417900  | -2.43931800 | 2.72208000  |
| C | 1.13331300  | -1.84898800 | 1.89450400  |
| C | 0.83212400  | -1.31389800 | 0.63130800  |
| C | -0.54483200 | -1.41925700 | 0.24303400  |
| H | -2.47170900 | -2.35721700 | 0.58807700  |
| H | -1.88827700 | -3.07893600 | 2.90820900  |
| H | 0.46637800  | -2.83961700 | 3.68645000  |
| H | 2.16482200  | -1.83218100 | 2.23240600  |
| C | 1.79978200  | -0.70586100 | -0.26653300 |

|    |             |             |             |
|----|-------------|-------------|-------------|
| H  | 1.53848900  | -0.80852400 | -1.31121300 |
| C  | 2.94008100  | -0.00375100 | 0.05638600  |
| C  | 3.31082400  | 0.44582100  | 1.38395800  |
| C  | 4.44538900  | 1.15426400  | 1.63051100  |
| H  | 2.61472700  | 0.23456800  | 2.18515900  |
| C  | 4.98781100  | 1.09942500  | -0.69479000 |
| C  | 5.33869200  | 1.48412000  | 0.56075100  |
| H  | 5.59663100  | 1.33043500  | -1.56205100 |
| H  | 6.25609600  | 2.03569400  | 0.72590700  |
| C  | -2.12610900 | 3.29640600  | 0.03367000  |
| H  | -1.83607600 | 4.26410400  | 0.45629500  |
| H  | -2.28057100 | 3.44389100  | -1.04266300 |
| C  | -3.42561500 | 2.78502100  | 0.68053500  |
| H  | -3.31940700 | 2.76602300  | 1.77243400  |
| H  | -4.26844300 | 3.44357400  | 0.44501700  |
| P  | -0.74408000 | 2.01993500  | 0.19678200  |
| P  | -3.76081900 | 1.00826600  | 0.15245300  |
| Br | -1.04855000 | -1.46793100 | -1.86570500 |
| C  | 3.55291900  | 0.01764200  | -2.34339200 |
| H  | 2.62775100  | 0.49115100  | -2.69295400 |
| H  | 4.37756700  | 0.33394900  | -2.98425600 |
| H  | 3.42979900  | -1.06878600 | -2.42139400 |
| N  | 3.84287300  | 0.39295400  | -0.96661800 |
| H  | -0.12557900 | 2.49048900  | 1.39027500  |
| H  | 0.19565100  | 2.62664500  | -0.68131000 |
| H  | -4.84466400 | 0.71471200  | 1.02382500  |
| H  | -4.56302600 | 1.23833100  | -0.99947200 |
| Ni | -1.76713400 | 0.03689200  | 0.05119100  |
| H  | 4.66452500  | 1.48977900  | 2.64049700  |

ub3lyp/6-31G(d)

Zero-point correction= 0.311887 (Hartree/Particle)  
 Thermal correction to Energy= 0.333188  
 Thermal correction to Enthalpy= 0.334132  
 Thermal correction to Gibbs Free Energy= 0.259720  
 Sum of electronic and zero-point Energies= -5400.606449  
 Sum of electronic and thermal Energies= -5400.585149  
 Sum of electronic and thermal Enthalpies= -5400.584205  
 Sum of electronic and thermal Free Energies= -5400.658617  
 Electronic energy (UM06) -5402.97122077

|   |             |             |             |
|---|-------------|-------------|-------------|
| C | -1.57575700 | -1.58897700 | 1.38091900  |
| C | -1.31331100 | -1.60139600 | 2.77656400  |
| C | -0.03981200 | -1.33012200 | 3.23791800  |
| C | 1.01776300  | -1.06738200 | 2.33985300  |
| C | 0.83364000  | -0.98661300 | 0.95602000  |
| C | -0.52117800 | -1.16887400 | 0.52396700  |
| H | -2.42003500 | -2.16056400 | 1.01369100  |
| H | -2.09357300 | -1.91441900 | 3.46624900  |
| H | 0.17718300  | -1.38286200 | 4.30176200  |
| H | 2.01867900  | -0.94422300 | 2.74155700  |
| C | 1.86930500  | -0.71380400 | -0.02646900 |
| H | 1.65800400  | -1.14171900 | -0.99734500 |
| C | 3.01673900  | 0.03310500  | 0.11925300  |
| C | 3.34428100  | 0.87104900  | 1.25542800  |
| C | 4.49363900  | 1.59354700  | 1.33012400  |
| H | 2.60374000  | 0.94125200  | 2.04121000  |
| C | 5.13704700  | 0.79685400  | -0.82687500 |
| C | 5.44755000  | 1.54639200  | 0.26318600  |
| H | 5.79264300  | 0.72930400  | -1.68823200 |
| H | 6.37926200  | 2.09759300  | 0.29866800  |

|    |             |             |             |
|----|-------------|-------------|-------------|
| C  | -2.31509700 | 3.14158400  | -0.66438200 |
| H  | -2.01765600 | 4.15942700  | -0.39186700 |
| H  | -2.55427500 | 3.14477800  | -1.73518700 |
| C  | -3.54225100 | 2.68598500  | 0.14269600  |
| H  | -3.36517800 | 2.84442300  | 1.21374400  |
| H  | -4.43876700 | 3.25150300  | -0.13246100 |
| P  | -0.90238600 | 1.91178900  | -0.43725600 |
| P  | -3.78825400 | 0.83344300  | -0.07305200 |
| Br | -0.92536600 | -1.88946700 | -1.48051500 |
| C  | 3.72500800  | -0.69810200 | -2.13781700 |
| H  | 2.82743500  | -0.33357900 | -2.65143500 |
| H  | 4.58080100  | -0.60590400 | -2.80837700 |
| H  | 3.57069500  | -1.75481400 | -1.89080100 |
| N  | 3.97693100  | 0.07070200  | -0.92759500 |
| H  | -0.15776400 | 2.57522800  | 0.57572300  |
| H  | -0.08591900 | 2.32562700  | -1.52545400 |
| H  | -4.74985900 | 0.60871200  | 0.94520300  |
| H  | -4.69449600 | 0.82060700  | -1.17093300 |
| Ni | -1.79524700 | -0.00386400 | -0.06628500 |
| H  | 4.67946400  | 2.22632000  | 2.19372600  |

## B-Ni

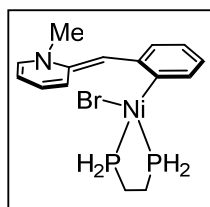

rb3lyp/6-31G(d)/Ni: lanl2dz

Zero-point correction= 0.312824 (Hartree/Particle)  
 Thermal correction to Energy= 0.335164  
 Thermal correction to Enthalpy= 0.336108  
 Thermal correction to Gibbs Free Energy= 0.258606  
 Sum of electronic and zero-point Energies= -4061.487289  
 Sum of electronic and thermal Energies= -4061.464949  
 Sum of electronic and thermal Enthalpies= -4061.464004  
 Sum of electronic and thermal Free Energies= -4061.541507  
 Electronic energy (RM06) -4064.14435644

|   |             |             |             |
|---|-------------|-------------|-------------|
| C | -1.05639900 | 2.68851900  | -0.99264200 |
| C | -0.30524400 | 3.84264000  | -1.24567800 |
| C | 1.05354600  | 3.85993900  | -0.92826800 |
| C | 1.65194600  | 2.73509700  | -0.36122900 |
| C | 0.91706000  | 1.55683500  | -0.11189500 |
| C | -0.46290200 | 1.55597800  | -0.42804100 |
| H | -2.11870600 | 2.68457000  | -1.22976200 |
| H | -0.78196200 | 4.71958400  | -1.67757600 |
| H | 1.64578200  | 4.75486700  | -1.10404700 |
| H | 2.69830100  | 2.77678800  | -0.06880300 |
| C | 1.50236500  | 0.37432200  | 0.54034400  |
| H | 0.86509000  | -0.06026100 | 1.30180300  |
| C | 2.73880800  | -0.17431300 | 0.30206600  |
| C | 3.62627400  | 0.21241700  | -0.78082700 |
| C | 4.82545200  | -0.38845800 | -0.99733500 |
| H | 3.27516200  | 0.99639000  | -1.44070100 |
| C | 4.44976800  | -1.82400400 | 0.87784200  |
| C | 5.27136900  | -1.44596000 | -0.13622500 |
| H | 4.71063800  | -2.61869400 | 1.56867300  |

|    |             |             |             |
|----|-------------|-------------|-------------|
| H  | 6.22601300  | -1.93803100 | -0.27705300 |
| C  | -1.41949600 | -2.37053500 | -2.43777200 |
| H  | -1.47832400 | -2.57262800 | -3.51253100 |
| H  | -0.61298100 | -2.99328800 | -2.03160400 |
| C  | -2.75017800 | -2.69579700 | -1.72971100 |
| H  | -3.58330100 | -2.21345900 | -2.25557600 |
| H  | -2.94580000 | -3.77262800 | -1.72912400 |
| P  | -0.93754900 | -0.58766400 | -2.08768100 |
| P  | -2.72135900 | -1.96767800 | 0.00367200  |
| Br | -2.07670100 | 0.60897600  | 2.11533900  |
| C  | 2.42244100  | -1.68914700 | 2.23132900  |
| H  | 1.47761900  | -2.12377900 | 1.88017500  |
| H  | 2.97396300  | -2.44460400 | 2.79385600  |
| H  | 2.17922300  | -0.85002400 | 2.89323800  |
| N  | 3.23307400  | -1.23270000 | 1.11375100  |
| H  | -1.53959600 | 0.11044400  | -3.16067700 |
| H  | 0.40749200  | -0.53062400 | -2.50185500 |
| H  | -4.07599200 | -2.04603300 | 0.39379900  |
| H  | -2.23157100 | -3.04725700 | 0.77720500  |
| Ni | -1.51388700 | -0.01914500 | -0.07753600 |
| H  | 5.44553900  | -0.07558400 | -1.83317900 |

ub3lpy/6-31G(d)

Zero-point correction= 0.313646 (Hartree/Particle)  
 Thermal correction to Energy= 0.335545  
 Thermal correction to Enthalpy= 0.336489  
 Thermal correction to Gibbs Free Energy= 0.260267  
 Sum of electronic and zero-point Energies= -5400.662581  
 Sum of electronic and thermal Energies= -5400.640682  
 Sum of electronic and thermal Enthalpies= -5400.639737  
 Sum of electronic and thermal Free Energies= -5400.715960  
 Electronic energy (UM06) -5403.02996675

|   |             |             |             |
|---|-------------|-------------|-------------|
| C | -1.11319100 | 2.74081900  | -0.81448000 |
| C | -0.37968100 | 3.91843600  | -0.99613600 |
| C | 0.98460100  | 3.92895400  | -0.70696700 |
| C | 1.60250100  | 2.77193900  | -0.23306800 |
| C | 0.87749900  | 1.57823900  | -0.05526100 |
| C | -0.50999900 | 1.56710000  | -0.34833200 |
| H | -2.17986900 | 2.74900200  | -1.03547800 |
| H | -0.87432900 | 4.81898500  | -1.35269300 |
| H | 1.56534900  | 4.84008700  | -0.83033100 |
| H | 2.65384000  | 2.80034500  | 0.04283300  |
| C | 1.47097200  | 0.35621800  | 0.51061600  |
| H | 0.84633300  | -0.11489400 | 1.25952000  |
| C | 2.70528500  | -0.18054000 | 0.24354500  |
| C | 3.60202400  | 0.26962300  | -0.80547000 |
| C | 4.79911500  | -0.32343100 | -1.05128500 |
| H | 3.26013500  | 1.09783600  | -1.41427000 |
| C | 4.39969700  | -1.87654500 | 0.72282900  |
| C | 5.23095300  | -1.43822400 | -0.25818200 |
| H | 4.65011000  | -2.71686200 | 1.36164300  |
| H | 6.18311100  | -1.92716800 | -0.42451300 |
| C | -1.49566600 | -2.12606700 | -2.59214900 |
| H | -1.62762800 | -2.20875700 | -3.67619700 |
| H | -0.64887200 | -2.76553100 | -2.31427800 |
| C | -2.76137800 | -2.55825800 | -1.82938700 |
| H | -3.64371300 | -2.06558200 | -2.25588800 |
| H | -2.92622400 | -3.63840100 | -1.89082900 |

|    |             |             |             |
|----|-------------|-------------|-------------|
| P  | -1.03529100 | -0.38005300 | -2.06978900 |
| P  | -2.61661000 | -1.95023900 | -0.06057300 |
| Br | -1.94199700 | 0.40476100  | 2.15376800  |
| C  | 2.36057100  | -1.81510600 | 2.06556600  |
| H  | 1.40366400  | -2.19092000 | 1.68057100  |
| H  | 2.88917200  | -2.62899200 | 2.56489700  |
| H  | 2.13750400  | -1.02605200 | 2.79309100  |
| N  | 3.18584600  | -1.29304600 | 0.98822700  |
| H  | -1.69879500 | 0.40121800  | -3.04453500 |
| H  | 0.29424200  | -0.28766600 | -2.52355200 |
| H  | -3.94157600 | -2.05895700 | 0.41414700  |
| H  | -2.05947300 | -3.06967600 | 0.60359700  |
| Ni | -1.49657600 | -0.03884900 | -0.05549100 |
| H  | 5.42881600  | 0.03989000  | -1.85905600 |

### B-Ni-TS

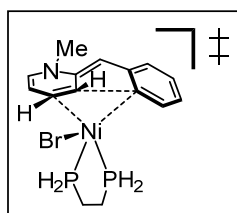

rb3lyp/6-31G(d)/Ni: lanl2dz

Zero-point correction= 0.310417 (Hartree/Particle)  
 Thermal correction to Energy= 0.332635  
 Thermal correction to Enthalpy= 0.333579  
 Thermal correction to Gibbs Free Energy= 0.256094  
 Sum of electronic and zero-point Energies= -4061.456474  
 Sum of electronic and thermal Energies= -4061.434256  
 Sum of electronic and thermal Enthalpies= -4061.433312  
 Sum of electronic and thermal Free Energies= -4061.510797  
 Electronic energy (RM06) -4064.10267966

|   |            |             |             |
|---|------------|-------------|-------------|
| C | 1.85748100 | 1.87109600  | -1.72570000 |
| C | 2.22813600 | 3.22080900  | -1.65950100 |
| C | 2.57268100 | 3.79893200  | -0.43303300 |
| C | 2.59372900 | 3.02395300  | 0.72793500  |
| C | 2.21339300 | 1.67391500  | 0.68177000  |
| C | 1.75059500 | 1.12934900  | -0.54478700 |
| H | 1.57955300 | 1.43283500  | -2.68161600 |
| H | 2.23238600 | 3.82100400  | -2.56569800 |
| H | 2.86281400 | 4.84523600  | -0.38928100 |
| H | 2.94310600 | 3.45177500  | 1.66503200  |
| C | 2.34715300 | 0.70520700  | 1.75956000  |
| H | 2.43499200 | 0.99687100  | 2.79983200  |
| C | 2.34222800 | -0.57935800 | 1.30783700  |
| C | 2.34911100 | -0.74044900 | -0.17582500 |
| C | 1.65573300 | -1.85390500 | -0.73867000 |
| H | 3.25884300 | -0.41164200 | -0.67353700 |
| C | 1.55512500 | -2.82471700 | 1.49664500  |
| C | 1.20764700 | -2.88469100 | 0.19142300  |
| H | 1.31628900 | -3.61747500 | 2.19724600  |
| H | 0.65050700 | -3.73515200 | -0.18045500 |
| C | 2.35717300 | -1.64342900 | 3.50313200  |
| H | 2.36351500 | -2.64452400 | 3.93967400  |
| H | 1.51705400 | -1.07291200 | 3.92879000  |
| H | 3.29047200 | -1.14018600 | 3.77399200  |



|    |             |             |             |
|----|-------------|-------------|-------------|
| N  | 2.25852300  | -1.74951500 | 2.05724900  |
| Br | -1.27653000 | -1.68748400 | -1.89766900 |
| C  | -3.96704700 | 1.49811400  | 0.80139800  |
| C  | -2.79329900 | 0.52022400  | 0.67207400  |
| H  | -3.64494500 | 2.43695100  | 1.26368500  |
| H  | -4.35810200 | 1.74120300  | -0.19377900 |
| H  | -3.09064400 | -0.40795000 | 0.17252500  |
| H  | -2.40483100 | 0.23721900  | 1.65895800  |
| P  | -5.39591200 | 0.72786100  | 1.77004400  |
| H  | -6.14616200 | 1.92736400  | 1.94899400  |
| H  | -4.79312400 | 0.81657400  | 3.06025200  |
| P  | -1.33687300 | 1.15506700  | -0.29432300 |
| H  | -1.05542700 | 2.36095900  | 0.40123700  |
| H  | -1.97794700 | 1.72838600  | -1.41697600 |
| Ni | 0.33533500  | -0.32300300 | -0.79467100 |
| H  | 1.87388500  | -2.14811700 | -1.76175900 |

ub3lyp/6-31G(d)

Zero-point correction= 0.311009 (Hartree/Particle)  
 Thermal correction to Energy= 0.332876  
 Thermal correction to Enthalpy= 0.333821  
 Thermal correction to Gibbs Free Energy= 0.257404  
 Sum of electronic and zero-point Energies= -5400.635145  
 Sum of electronic and thermal Energies= -5400.613277  
 Sum of electronic and thermal Enthalpies= -5400.612333  
 Sum of electronic and thermal Free Energies= -5400.688749  
 Electronic energy (UM06) -5402.98756556

|    |             |             |             |
|----|-------------|-------------|-------------|
| C  | 2.14726900  | 1.69386700  | -1.64209300 |
| C  | 2.55396700  | 3.03155300  | -1.57217300 |
| C  | 2.73556000  | 3.65294800  | -0.33253700 |
| C  | 2.55562400  | 2.92970400  | 0.84850300  |
| C  | 2.13607000  | 1.59478300  | 0.79520500  |
| C  | 1.82696000  | 1.00675900  | -0.46329100 |
| H  | 2.00428300  | 1.22162700  | -2.61127500 |
| H  | 2.71943600  | 3.58896400  | -2.49037000 |
| H  | 3.05682000  | 4.69004600  | -0.28774100 |
| H  | 2.78040100  | 3.38555700  | 1.81011200  |
| C  | 2.06850100  | 0.65875200  | 1.90761500  |
| H  | 2.04212900  | 0.97564800  | 2.94381200  |
| C  | 2.05522200  | -0.63569600 | 1.47874900  |
| C  | 2.23891400  | -0.79343800 | 0.00355400  |
| C  | 1.57936400  | -1.89100600 | -0.66200300 |
| H  | 3.24885200  | -0.56746900 | -0.33678500 |
| C  | 1.23056600  | -2.87551300 | 1.55733700  |
| C  | 1.05903900  | -2.93895600 | 0.21979100  |
| H  | 0.91043700  | -3.67146200 | 2.22071400  |
| H  | 0.56901500  | -3.80478100 | -0.20938500 |
| C  | 1.71179300  | -1.67300000 | 3.65454400  |
| H  | 1.64042200  | -2.66977500 | 4.09512200  |
| H  | 0.81959600  | -1.09270500 | 3.93701400  |
| H  | 2.59456700  | -1.17396200 | 4.06603300  |
| N  | 1.84214300  | -1.79209500 | 2.21226400  |
| Br | -1.14273300 | -1.50648300 | -2.06088300 |
| C  | -3.82511800 | 1.59138400  | 0.73046500  |
| C  | -2.73254600 | 0.53451200  | 0.53281900  |
| H  | -3.45565900 | 2.42653000  | 1.33442000  |
| H  | -4.12499700 | 2.00033500  | -0.24180500 |
| H  | -3.07653000 | -0.29162800 | -0.09884000 |

|    |             |             |             |
|----|-------------|-------------|-------------|
| H  | -2.43095200 | 0.09232400  | 1.49099800  |
| P  | -5.37783900 | 0.83862800  | 1.50134800  |
| H  | -6.03249800 | 2.06959200  | 1.80113200  |
| H  | -4.86062300 | 0.69809600  | 2.82368000  |
| P  | -1.17438500 | 1.15613400  | -0.26541300 |
| H  | -0.86399800 | 2.25313600  | 0.57985800  |
| H  | -1.70120500 | 1.88835500  | -1.35596300 |
| Ni | 0.41101500  | -0.34906800 | -0.78880900 |
| H  | 1.98898200  | -2.21430400 | -1.61694200 |

### C-Ni-anti

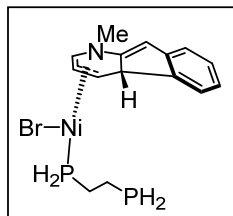

rb3lyp/6-31G(d)/Ni: lan12dz

Zero-point correction= 0.313105 (Hartree/Particle)  
 Thermal correction to Energy= 0.335442  
 Thermal correction to Enthalpy= 0.336386  
 Thermal correction to Gibbs Free Energy= 0.258039  
 Sum of electronic and zero-point Energies= -4061.517384  
 Sum of electronic and thermal Energies= -4061.495047  
 Sum of electronic and thermal Enthalpies= -4061.494103  
 Sum of electronic and thermal Free Energies= -4061.572449  
 Electronic energy (RM06) -4064.16495752

|    |             |             |             |
|----|-------------|-------------|-------------|
| C  | -2.29817200 | 2.87789500  | 1.06945800  |
| C  | -2.48919700 | 4.02806100  | 0.28852400  |
| C  | -2.89200600 | 3.91797600  | -1.04599000 |
| C  | -3.10617100 | 2.66594500  | -1.63196400 |
| C  | -2.90009900 | 1.51798300  | -0.86227200 |
| C  | -2.49369000 | 1.63305300  | 0.48907100  |
| H  | -1.99840400 | 2.96824600  | 2.11125000  |
| H  | -2.32641100 | 5.00962900  | 0.72503700  |
| H  | -3.04240200 | 4.81785400  | -1.63684400 |
| H  | -3.42216700 | 2.59076700  | -2.66936600 |
| C  | -2.99574300 | 0.10239800  | -1.21304800 |
| H  | -3.21171200 | -0.26925400 | -2.20730600 |
| C  | -2.67267800 | -0.63563700 | -0.12133900 |
| C  | -2.42884400 | 0.24688500  | 1.09430300  |
| C  | -1.19986100 | -0.22171600 | 1.86303100  |
| H  | -3.30469100 | 0.14344200  | 1.76376000  |
| C  | -1.61244400 | -2.44989100 | 0.98511900  |
| C  | -1.13612000 | -1.64907700 | 2.02151600  |
| H  | -1.40519900 | -3.51294800 | 0.96693400  |
| H  | -0.58160000 | -2.12543100 | 2.82400100  |
| C  | -2.61933200 | -2.83272300 | -1.20704500 |
| H  | -1.82032600 | -2.62495700 | -1.92977400 |
| H  | -2.57563100 | -3.88625600 | -0.92350600 |
| H  | -3.59401800 | -2.62901700 | -1.65799000 |
| N  | -2.46256400 | -2.00812100 | -0.01046300 |
| Br | 1.38740700  | -2.42149600 | -0.76817400 |
| C  | 3.14214200  | 0.76136500  | 0.24244200  |
| C  | 3.90996500  | 1.96362700  | -0.31940300 |
| H  | 3.33967000  | 0.63174900  | 1.31418400  |

|    |             |             |             |
|----|-------------|-------------|-------------|
| H  | 3.43378300  | -0.17617200 | -0.24344600 |
| H  | 3.71790600  | 2.05761000  | -1.39500700 |
| H  | 3.57856200  | 2.89406300  | 0.15342800  |
| P  | 1.29526600  | 0.85829000  | 0.06214800  |
| H  | 1.03252700  | 2.12296000  | 0.64561000  |
| H  | 1.16119900  | 1.24088200  | -1.29254300 |
| P  | 5.77634400  | 1.73747700  | -0.12211900 |
| H  | 6.14111100  | 3.07894800  | -0.43980900 |
| H  | 5.82680000  | 1.97059100  | 1.28438200  |
| Ni | 0.18906300  | -0.94250400 | 0.63767500  |
| H  | -0.88472400 | 0.40326700  | 2.69659000  |

ub3lyp/6-31G(d)

Zero-point correction= 0.313795 (Hartree/Particle)

Thermal correction to Energy= 0.335769

Thermal correction to Enthalpy= 0.336713

Thermal correction to Gibbs Free Energy= 0.259137

Sum of electronic and zero-point Energies= -5400.691070

Sum of electronic and thermal Energies= -5400.669096

Sum of electronic and thermal Enthalpies= -5400.668152

Sum of electronic and thermal Free Energies= -5400.745728

Electronic energy (UM06) -5403.04952581

|    |             |             |             |
|----|-------------|-------------|-------------|
| C  | -2.40623900 | 2.77912000  | 1.11984300  |
| C  | -2.61463900 | 3.95561600  | 0.38360400  |
| C  | -2.95045600 | 3.88903400  | -0.97126100 |
| C  | -3.07879700 | 2.65736100  | -1.62235200 |
| C  | -2.85451600 | 1.48432600  | -0.89750500 |
| C  | -2.51726400 | 1.55568700  | 0.47631600  |
| H  | -2.16017300 | 2.83349100  | 2.17825100  |
| H  | -2.51822100 | 4.92187100  | 0.87104300  |
| H  | -3.11576500 | 4.80770300  | -1.52850800 |
| H  | -3.34303500 | 2.61762200  | -2.67614400 |
| C  | -2.86198600 | 0.08386200  | -1.31644700 |
| H  | -3.00588700 | -0.24985900 | -2.33679300 |
| C  | -2.54934600 | -0.68959000 | -0.24516400 |
| C  | -2.42129100 | 0.14648300  | 1.02058500  |
| C  | -1.21753000 | -0.30510100 | 1.83687300  |
| H  | -3.32468800 | -0.03403200 | 1.63177600  |
| C  | -1.38108800 | -2.46743000 | 0.83068500  |
| C  | -1.12301200 | -1.72593900 | 1.99180800  |
| H  | -1.14311300 | -3.52330700 | 0.79699400  |
| H  | -0.63051500 | -2.20881300 | 2.83115000  |
| C  | -2.30832100 | -2.81920800 | -1.41210600 |
| H  | -1.49978300 | -2.51991300 | -2.09201100 |
| H  | -2.19568900 | -3.87970700 | -1.17758500 |
| H  | -3.27526800 | -2.66687100 | -1.89937200 |
| N  | -2.27580800 | -2.04995500 | -0.17193500 |
| Br | 1.48497700  | -2.36597600 | -0.68205800 |
| C  | 3.04044800  | 0.81984700  | 0.21019100  |
| C  | 3.67693600  | 2.14304800  | -0.22850600 |
| H  | 3.35408200  | 0.54724800  | 1.22591200  |
| H  | 3.33522300  | -0.01426200 | -0.43559400 |
| H  | 3.35635600  | 2.39168400  | -1.24741900 |
| H  | 3.35671600  | 2.96362800  | 0.42185300  |
| P  | 1.18467800  | 0.81154400  | 0.22211500  |
| H  | 0.92064400  | 1.98274300  | 0.97228200  |
| H  | 0.88755100  | 1.33341200  | -1.05825900 |

|    |             |             |             |
|----|-------------|-------------|-------------|
| P  | 5.56201400  | 2.01412900  | -0.27329100 |
| H  | 5.82261800  | 3.41042900  | -0.39890700 |
| H  | 5.76648700  | 2.01936800  | 1.13845800  |
| Ni | 0.16124300  | -1.04710700 | 0.67427400  |
| H  | -0.94366100 | 0.31760600  | 2.68706000  |

### C-Ni-syn

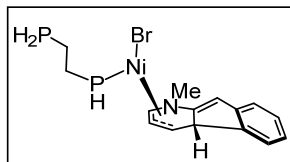

rb3lyp/6-31G(d)/Ni: lanl2dz

Zero-point correction= 0.312495 (Hartree/Particle)

Thermal correction to Energy= 0.334935

Thermal correction to Enthalpy= 0.335879

Thermal correction to Gibbs Free Energy= 0.257283

Sum of electronic and zero-point Energies= -4061.508153

Sum of electronic and thermal Energies= -4061.485713

Sum of electronic and thermal Enthalpies= -4061.484769

Sum of electronic and thermal Free Energies= -4061.563365

Electronic energy (RM06) -4064.15594113

|    |             |             |             |
|----|-------------|-------------|-------------|
| C  | -4.08781300 | -1.85001000 | 0.30999500  |
| C  | -5.46622900 | -2.06944200 | 0.16535000  |
| C  | -6.30673100 | -1.03683200 | -0.26020600 |
| C  | -5.79724900 | 0.23469200  | -0.54585500 |
| C  | -4.42823300 | 0.46268200  | -0.38807700 |
| C  | -3.58256300 | -0.58732100 | 0.04347900  |
| H  | -3.43343400 | -2.65909700 | 0.62574300  |
| H  | -5.88088100 | -3.05007900 | 0.38175800  |
| H  | -7.37172000 | -1.22369300 | -0.37232100 |
| H  | -6.45916300 | 1.03094300  | -0.87749200 |
| C  | -3.63380000 | 1.67992900  | -0.55563500 |
| H  | -4.04395700 | 2.65247200  | -0.80188800 |
| C  | -2.34199800 | 1.39732200  | -0.25368100 |
| C  | -2.15139700 | -0.08141000 | 0.02981400  |
| C  | -1.23622700 | -0.29809600 | 1.22950500  |
| H  | -1.66993300 | -0.53874700 | -0.85160800 |
| C  | -0.35400800 | 1.91239400  | 0.94183700  |
| C  | -0.61389500 | 0.81905900  | 1.81270100  |
| H  | 0.26734400  | 2.73981700  | 1.26733800  |
| H  | -0.09347200 | 0.75467700  | 2.76377400  |
| C  | -1.35655200 | 3.62622500  | -0.52346600 |
| H  | -2.02703400 | 4.20353000  | 0.13158300  |
| H  | -0.36650700 | 4.08939900  | -0.51331900 |
| H  | -1.74755600 | 3.66318600  | -1.54388200 |
| N  | -1.24602800 | 2.23769300  | -0.10233600 |
| Br | 1.07077700  | -2.04637200 | -0.39427000 |
| C  | 4.07112800  | 0.11389000  | 0.15660300  |
| C  | 5.35591900  | 0.51840100  | -0.57498100 |
| H  | 4.13484700  | 0.34550900  | 1.22755500  |
| H  | 3.87639700  | -0.96110700 | 0.07826100  |
| H  | 5.27719000  | 0.25407100  | -1.63632000 |
| H  | 5.51418600  | 1.60046200  | -0.51836500 |
| P  | 2.52059400  | 0.93132100  | -0.46149300 |
| H  | 2.90126300  | 2.30034700  | -0.38819400 |

|    |             |             |             |
|----|-------------|-------------|-------------|
| H  | 2.65905500  | 0.78110700  | -1.86011000 |
| P  | 6.85160500  | -0.41768600 | 0.10411300  |
| H  | 7.84737500  | 0.36486800  | -0.55095000 |
| H  | 6.96615000  | 0.31101800  | 1.32536200  |
| Ni | 0.61432600  | 0.13495000  | 0.38174200  |
| H  | -1.31136900 | -1.23151800 | 1.77649300  |

ub3lyp/6-31G(d)

Zero-point correction= 0.313587 (Hartree/Particle)  
 Thermal correction to Energy= 0.335515  
 Thermal correction to Enthalpy= 0.336459  
 Thermal correction to Gibbs Free Energy= 0.259008  
 Sum of electronic and zero-point Energies= -5400.683859  
 Sum of electronic and thermal Energies= -5400.661931  
 Sum of electronic and thermal Enthalpies= -5400.660987  
 Sum of electronic and thermal Free Energies= -5400.738437  
 Electronic energy (UM06) -5403.038739

|    |             |             |             |
|----|-------------|-------------|-------------|
| C  | -4.06875100 | -1.82499800 | 0.24547300  |
| C  | -5.45310200 | -2.01783500 | 0.12387000  |
| C  | -6.28268600 | -0.95985000 | -0.25662200 |
| C  | -5.75579200 | 0.30901200  | -0.52050500 |
| C  | -4.38003700 | 0.50840800  | -0.38713600 |
| C  | -3.54475200 | -0.56612300 | 0.00047800  |
| H  | -3.42284500 | -2.65335700 | 0.52727700  |
| H  | -5.88043100 | -2.99671900 | 0.32310600  |
| H  | -7.35319700 | -1.12434300 | -0.35081700 |
| H  | -6.40981300 | 1.12547500  | -0.81702800 |
| C  | -3.56612300 | 1.71308400  | -0.54426500 |
| H  | -3.96184400 | 2.69877000  | -0.75943200 |
| C  | -2.27300600 | 1.39908000  | -0.27993900 |
| C  | -2.10711700 | -0.08641200 | -0.01717300 |
| C  | -1.21037900 | -0.33037400 | 1.19487100  |
| H  | -1.63138700 | -0.54131000 | -0.90194600 |
| C  | -0.24644900 | 1.81963600  | 0.88572000  |
| C  | -0.59153500 | 0.77800700  | 1.80205700  |
| H  | 0.37568700  | 2.63858300  | 1.23433700  |
| H  | -0.12854900 | 0.72396600  | 2.78386300  |
| C  | -1.28022600 | 3.62422300  | -0.44848300 |
| H  | -1.91221600 | 4.15124000  | 0.28374500  |
| H  | -0.28857500 | 4.08429900  | -0.45610500 |
| H  | -1.72373800 | 3.74151400  | -1.44105500 |
| N  | -1.15487700 | 2.20765400  | -0.14375700 |
| Br | 1.03610500  | -2.03644200 | -0.36454600 |
| C  | 4.02850700  | 0.07314000  | 0.14596900  |
| C  | 5.29116100  | 0.55899200  | -0.57390000 |
| H  | 4.09524100  | 0.24976600  | 1.22709100  |
| H  | 3.87035300  | -1.00250700 | 0.01311000  |
| H  | 5.20820600  | 0.35448400  | -1.64798100 |
| H  | 5.41567200  | 1.64049000  | -0.45638200 |
| P  | 2.45072800  | 0.87371300  | -0.41712000 |
| H  | 2.80356500  | 2.24542700  | -0.29459000 |
| H  | 2.57109100  | 0.77578000  | -1.82234900 |
| P  | 6.82277100  | -0.36730400 | 0.03461000  |
| H  | 7.78648400  | 0.48348900  | -0.58185600 |
| H  | 6.92769700  | 0.29044500  | 1.29615100  |

|    |             |             |            |
|----|-------------|-------------|------------|
| Ni | 0.58422200  | 0.09309100  | 0.40617000 |
| H  | -1.33994600 | -1.25420800 | 1.74866600 |

### C-Ni-TS

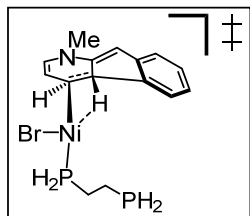

rb3lyp/6-31G(d)/Ni: lanl2dz

Zero-point correction= 0.307731 (Hartree/Particle)  
 Thermal correction to Energy= 0.330087  
 Thermal correction to Enthalpy= 0.331031  
 Thermal correction to Gibbs Free Energy= 0.252751  
 Sum of electronic and zero-point Energies= -4061.493950  
 Sum of electronic and thermal Energies= -4061.471594  
 Sum of electronic and thermal Enthalpies= -4061.470650  
 Sum of electronic and thermal Free Energies= -4061.548930  
 Electronic energy (RM06) -4064.13629103

|    |             |             |             |
|----|-------------|-------------|-------------|
| C  | -1.32816500 | 2.15404400  | -1.60688800 |
| C  | -1.61649500 | 3.51424600  | -1.73872600 |
| C  | -2.57010900 | 4.12013800  | -0.90514900 |
| C  | -3.25698100 | 3.38901500  | 0.06388100  |
| C  | -2.98741200 | 2.01993100  | 0.19984900  |
| C  | -2.01571200 | 1.41699600  | -0.64589000 |
| H  | -0.58004900 | 1.68056300  | -2.23812700 |
| H  | -1.09890800 | 4.10666300  | -2.48760100 |
| H  | -2.77734900 | 5.18145000  | -1.01765400 |
| H  | -3.99338900 | 3.87408500  | 0.69962800  |
| C  | -3.56337100 | 1.01475800  | 1.07735200  |
| H  | -4.35934000 | 1.19353900  | 1.78881000  |
| C  | -2.96822000 | -0.18422800 | 0.79496200  |
| C  | -1.91977400 | -0.00601400 | -0.26267000 |
| C  | -1.56483300 | -1.13835400 | -1.06190200 |
| H  | -0.79111400 | 0.04968700  | 0.82172100  |
| C  | -2.67105700 | -2.54303100 | 0.60786600  |
| C  | -1.92173000 | -2.43142500 | -0.52812100 |
| H  | -2.91439000 | -3.50564700 | 1.04273900  |
| H  | -1.56138100 | -3.32834000 | -1.01687200 |
| C  | -4.19077000 | -1.62632400 | 2.33100300  |
| H  | -5.19164800 | -1.32669200 | 1.99456900  |
| H  | -4.21582100 | -2.67385700 | 2.63639600  |
| H  | -3.91306500 | -1.00846100 | 3.19186400  |
| N  | -3.21674400 | -1.45473700 | 1.26298600  |
| Br | 1.56595700  | -1.84764500 | -1.59882400 |
| C  | 3.20324000  | 0.65201700  | 0.64561800  |
| C  | 4.44649800  | 0.74253200  | 1.53751300  |
| H  | 3.42600200  | 0.18537800  | -0.32004100 |
| H  | 2.79385500  | 1.64691800  | 0.43073800  |
| H  | 4.18922200  | 1.18423600  | 2.50798800  |
| H  | 4.85314500  | -0.25572900 | 1.72875400  |
| P  | 1.80905300  | -0.35473000 | 1.34563400  |
| H  | 2.48045000  | -1.50926300 | 1.80652400  |
| H  | 1.62083900  | 0.27697600  | 2.60111800  |
| P  | 5.75481200  | 1.86659500  | 0.76384600  |

|    |             |             |             |
|----|-------------|-------------|-------------|
| H  | 6.82109200  | 1.51166500  | 1.64086600  |
| H  | 6.17602400  | 0.96440200  | -0.25525800 |
| Ni | 0.14671000  | -0.77183100 | -0.03688700 |
| H  | -1.27196700 | -1.02934900 | -2.09975800 |

ub3lyp/6-31G(d)

Zero-point correction= 0.308878 (Hartree/Particle)  
 Thermal correction to Energy= 0.330296  
 Thermal correction to Enthalpy= 0.331240  
 Thermal correction to Gibbs Free Energy= 0.257651  
 Sum of electronic and zero-point Energies= -5400.657737  
 Sum of electronic and thermal Energies= -5400.636320  
 Sum of electronic and thermal Enthalpies= -5400.635375  
 Sum of electronic and thermal Free Energies= -5400.708964  
 Electronic energy (UM06) -5403.02018321

|    |             |             |             |
|----|-------------|-------------|-------------|
| C  | 1.89420800  | -2.19224500 | -0.70063400 |
| C  | 2.85354200  | -3.16810400 | -0.41610600 |
| C  | 4.01340800  | -2.83520500 | 0.29852100  |
| C  | 4.24245100  | -1.52979900 | 0.73274400  |
| C  | 3.29676400  | -0.53892600 | 0.43761200  |
| C  | 2.12437500  | -0.88243000 | -0.28769100 |
| H  | 0.98242700  | -2.45465800 | -1.23184500 |
| H  | 2.69574200  | -4.19135100 | -0.74518600 |
| H  | 4.74525900  | -3.60818000 | 0.52028100  |
| H  | 5.14483100  | -1.28436500 | 1.28757100  |
| C  | 3.29395800  | 0.88669100  | 0.71595000  |
| H  | 4.10827700  | 1.42803200  | 1.18082000  |
| C  | 2.15457900  | 1.42191600  | 0.18426400  |
| C  | 1.29016700  | 0.34121300  | -0.40441200 |
| C  | 0.42685900  | 0.72459800  | -1.49355700 |
| H  | 0.39705300  | 0.31490900  | 0.82932900  |
| C  | 0.85025700  | 3.07324600  | -0.94250300 |
| C  | 0.23392400  | 2.14383700  | -1.71584700 |
| H  | 0.66846800  | 4.13648000  | -1.05252200 |
| H  | -0.46606000 | 2.46917200  | -2.47755000 |
| C  | 2.62564000  | 3.76750500  | 0.62370500  |
| H  | 3.61235000  | 3.78929400  | 0.14038200  |
| H  | 2.14935300  | 4.74307400  | 0.50676200  |
| H  | 2.76624600  | 3.56698700  | 1.69064700  |
| N  | 1.77574600  | 2.74117200  | 0.03990200  |
| C  | -2.69140100 | -0.75828500 | 2.53207300  |
| C  | -3.48916500 | 0.29264700  | 1.73743400  |
| H  | -3.35295000 | -1.53592400 | 2.92717000  |
| H  | -2.19758100 | -0.28484800 | 3.38981600  |
| H  | -4.07300400 | -0.19573000 | 0.95112400  |
| H  | -4.18416100 | 0.82354500  | 2.39515900  |
| P  | -1.32166500 | -1.50762400 | 1.48912600  |
| H  | -0.47783300 | -1.99094300 | 2.51772800  |
| H  | -1.88125400 | -2.73634300 | 1.07652600  |
| P  | -2.32833400 | 1.48330200  | 0.86098600  |
| H  | -3.26003500 | 2.16604100  | 0.04302500  |
| H  | -2.22068000 | 2.47775900  | 1.87728300  |
| Br | -2.32641500 | -0.86534000 | -1.58448200 |
| Ni | -0.72926400 | -0.02484800 | -0.04934200 |
| H  | 0.28981100  | 0.04634600  | -2.32838000 |

## D-Ni: LNiHBr

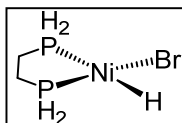

rb3lyp/6-31G(d)/Ni: lanl2dz

Zero-point correction= 0.103664 (Hartree/Particle)  
Thermal correction to Energy= 0.113467  
Thermal correction to Enthalpy= 0.114411  
Thermal correction to Gibbs Free Energy= 0.066909  
Sum of electronic and zero-point Energies= -3504.969093  
Sum of electronic and thermal Energies= -3504.959290  
Sum of electronic and thermal Enthalpies= -3504.958345  
Sum of electronic and thermal Free Energies= -3505.005848  
Electronic energy (RM06) -3507.68181984

|    |             |             |             |
|----|-------------|-------------|-------------|
| C  | -2.60890100 | 1.29644500  | -0.28723800 |
| H  | -3.21888100 | 2.12014000  | 0.09594900  |
| H  | -2.72717200 | 1.28121100  | -1.37741800 |
| C  | -3.06221600 | -0.04906600 | 0.31287200  |
| H  | -3.12184500 | 0.02617800  | 1.40543400  |
| H  | -4.05472900 | -0.33515100 | -0.04997500 |
| P  | -0.77711600 | 1.55060600  | 0.04838100  |
| P  | -1.78478000 | -1.37821200 | -0.05152400 |
| H  | -0.79368300 | 2.26754900  | 1.26865900  |
| H  | -0.45974300 | 2.62865500  | -0.80688200 |
| H  | -2.17671600 | -2.42246300 | 0.81355800  |
| H  | -2.24579500 | -1.93249900 | -1.26902300 |
| H  | 0.65862900  | -1.93098800 | -0.06208300 |
| Br | 2.42461900  | 0.08609600  | 0.01026400  |
| Ni | 0.20476500  | -0.52807700 | -0.01729000 |

## D-Ni: Product

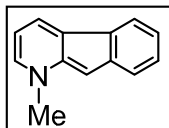

rb3lyp/6-31G(d)/Ni: lanl2dz

Zero-point correction= 0.204921 (Hartree/Particle)  
Thermal correction to Energy= 0.215345  
Thermal correction to Enthalpy= 0.216289  
Thermal correction to Gibbs Free Energy= 0.169151  
Sum of electronic and zero-point Energies= -556.544879  
Sum of electronic and thermal Energies= -556.534455  
Sum of electronic and thermal Enthalpies= -556.533511  
Sum of electronic and thermal Free Energies= -556.580649  
Electronic energy (RM06) -556.46886803

|   |            |             |             |
|---|------------|-------------|-------------|
| C | 2.22153200 | 1.37914500  | 0.00005600  |
| C | 3.49643600 | 0.82080500  | 0.00017200  |
| C | 3.65850200 | -0.57745900 | 0.00011300  |
| C | 2.56167500 | -1.43403800 | -0.00003000 |
| C | 1.26675800 | -0.89065500 | -0.00018800 |
| C | 1.10737500 | 0.53323200  | -0.00019000 |
| H | 2.09653300 | 2.46001600  | 0.00002600  |
| H | 4.37142000 | 1.46499000  | 0.00028500  |
| H | 4.66233500 | -0.99580900 | 0.00025500  |
| H | 2.70713800 | -2.51180600 | -0.00007100 |



|   |             |             |             |
|---|-------------|-------------|-------------|
| C | -0.03328800 | -1.52301800 | -0.00007400 |
| H | -0.21391100 | -2.58986800 | 0.00005300  |
| C | -0.96694300 | -0.51132400 | -0.00025600 |
| C | -0.31316500 | 0.80183000  | -0.00014600 |
| C | -1.07247100 | 1.94233300  | 0.00007600  |
| C | -3.08131000 | 0.59419400  | -0.00002200 |
| C | -2.49075800 | 1.83287600  | 0.00011100  |
| H | -4.15744200 | 0.46279200  | -0.00006300 |
| H | -3.11966900 | 2.71546300  | 0.00015900  |
| C | -2.99268600 | -1.86769400 | 0.00034800  |
| H | -2.69005400 | -2.43159200 | 0.88989900  |
| H | -4.07706100 | -1.74562900 | -0.00034900 |
| H | -2.68908900 | -2.43287800 | -0.88803300 |
| N | -2.35021300 | -0.56036100 | -0.00030600 |
| H | -0.60864700 | 2.92548600  | 0.00015500  |

## D-Ni

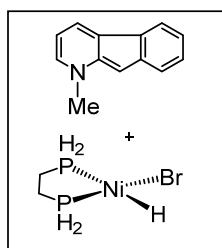

ub3lyp/6-31G(d)

Zero-point correction= 0.309921 (Hartree/Particle)  
 Thermal correction to Energy= 0.332412  
 Thermal correction to Enthalpy= 0.333357  
 Thermal correction to Gibbs Free Energy= 0.237631  
 Sum of electronic and zero-point Energies= -5400.662291  
 Sum of electronic and thermal Energies= -5400.639800  
 Sum of electronic and thermal Enthalpies= -5400.638856  
 Sum of electronic and thermal Free Energies= -5400.734581  
 Electronic energy (UM06) -5403.03970515

|   |              |             |             |
|---|--------------|-------------|-------------|
| C | -28.64258100 | 1.68589500  | 0.01057000  |
| C | -28.77307700 | 3.06745800  | 0.11747900  |
| C | -30.04766300 | 3.65196000  | 0.24132100  |
| C | -31.20233400 | 2.87529900  | 0.26038400  |
| C | -31.09224800 | 1.47936600  | 0.15374300  |
| C | -29.79257900 | 0.88945700  | 0.02812300  |
| H | -27.65727100 | 1.23426900  | -0.08512600 |
| H | -27.88906000 | 3.69907300  | 0.10544500  |
| H | -30.13051800 | 4.73320800  | 0.32367000  |
| H | -32.17823700 | 3.34547700  | 0.35705800  |
| C | -32.09782100 | 0.44077400  | 0.14505100  |
| H | -33.16535500 | 0.59833200  | 0.22484100  |
| C | -31.43093400 | -0.75684400 | 0.01750500  |
| C | -29.98193000 | -0.54110300 | -0.06084100 |
| C | -29.13849500 | -1.61308300 | -0.19081900 |
| C | -31.04449800 | -3.10337800 | -0.17273600 |
| C | -29.68600700 | -2.92494300 | -0.24794500 |
| H | -31.50529900 | -4.08385900 | -0.21191500 |
| H | -29.04627100 | -3.79372100 | -0.35029900 |
| C | -33.34994900 | -2.25947400 | 0.03530700  |
| H | -33.84657900 | -1.73507900 | -0.78883400 |
| H | -33.57468200 | -3.32565400 | -0.02516400 |
| H | -33.73279500 | -1.85948600 | 0.98098400  |
| N | -31.91001600 | -2.05390500 | -0.04286300 |

|    |              |             |             |
|----|--------------|-------------|-------------|
| H  | -28.06171200 | -1.47609400 | -0.25044300 |
| C  | 28.32781900  | 0.26231700  | 1.35159800  |
| H  | 29.24461800  | 0.85925300  | 1.33071200  |
| H  | 28.02596800  | 0.15758000  | 2.40059600  |
| C  | 28.54136300  | -1.12638500 | 0.72297700  |
| H  | 29.06326400  | -1.03095600 | -0.23682900 |
| H  | 29.14524000  | -1.77612800 | 1.36441000  |
| P  | 26.90413700  | 1.11451100  | 0.47411300  |
| P  | 26.86547500  | -1.87996700 | 0.33662400  |
| H  | 27.56773600  | 1.88696300  | -0.50714400 |
| H  | 26.56971700  | 2.13549800  | 1.38897500  |
| H  | 27.21064500  | -2.89982300 | -0.57610500 |
| H  | 26.61354200  | -2.68007600 | 1.47764500  |
| H  | 24.68462000  | -1.59038400 | -0.53411600 |
| Br | 23.78238900  | 0.93753400  | -0.80492100 |
| Ni | 25.48465600  | -0.41131500 | -0.16240900 |

### Pd species from Schemes S2.2 and S2.3

A'

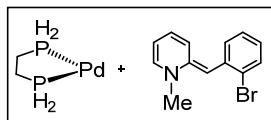

Zero-point correction= 0.311590 (Hartree/Particle)

Thermal correction to Energy= 0.334886

Thermal correction to Enthalpy= 0.335830

Thermal correction to Gibbs Free Energy= 0.240333

Sum of electronic and zero-point Energies= -4018.897901

Sum of electronic and thermal Energies= -4018.874605

Sum of electronic and thermal Enthalpies= -4018.873661 Sum of electronic and thermal Free Energies= -4018.969158

Electronic energy (RM06) -4021.50974327

|    |             |             |             |
|----|-------------|-------------|-------------|
| C  | 0.07805500  | 3.06288700  | -0.95937100 |
| C  | -0.90658500 | 3.98006800  | -1.32673500 |
| C  | -2.20318100 | 3.52329700  | -1.57073300 |
| C  | -2.50718900 | 2.17214600  | -1.43962700 |
| C  | -1.54931200 | 1.21110800  | -1.03489100 |
| C  | -0.24544100 | 1.71617400  | -0.81959800 |
| H  | 1.09572200  | 3.38890000  | -0.77356100 |
| H  | -0.65600200 | 5.03176400  | -1.43047600 |
| H  | -2.97748500 | 4.21777100  | -1.88622400 |
| H  | -3.50502600 | 1.82815800  | -1.69244100 |
| C  | -1.85087400 | -0.21135500 | -0.92641500 |
| H  | -1.02697200 | -0.86380400 | -1.18110000 |
| C  | -3.02369900 | -0.77906700 | -0.48368800 |
| C  | -4.12092300 | -0.06445000 | 0.13928500  |
| C  | -5.24895600 | -0.68673300 | 0.57455400  |
| H  | -3.99019800 | 0.99891400  | 0.29291000  |
| C  | -4.36170100 | -2.79108500 | -0.12278400 |
| C  | -5.39664100 | -2.10322000 | 0.42709500  |
| H  | -4.38303100 | -3.86814100 | -0.24693000 |
| H  | -6.28633500 | -2.62642300 | 0.75535300  |
| Pd | 15.20412900 | -3.68032800 | 31.49824100 |
| C  | 15.87873400 | -3.80771500 | 34.61811000 |
| H  | 16.18599300 | -3.32828500 | 35.55453000 |
| H  | 15.13514700 | -4.57224500 | 34.87563400 |

|    |             |             |             |
|----|-------------|-------------|-------------|
| C  | 17.09850800 | -4.46982700 | 33.94640400 |
| H  | 17.87174600 | -3.71599600 | 33.75266600 |
| H  | 17.53520300 | -5.21422000 | 34.62190300 |
| P  | 14.98354800 | -2.56423700 | 33.50582100 |
| P  | 16.70500300 | -5.25484400 | 32.26880300 |
| Br | 1.17986000  | 0.53298000  | -0.29903800 |
| C  | -2.15568200 | -3.00127000 | -1.14139400 |
| H  | -1.24403900 | -2.95157300 | -0.53422400 |
| H  | -2.49041100 | -4.03850900 | -1.19330800 |
| H  | -1.91556000 | -2.64840900 | -2.15115400 |
| N  | -3.21147300 | -2.18299000 | -0.56191500 |
| H  | 15.75627800 | -1.40526800 | 33.79976100 |
| H  | 13.93326500 | -2.23871600 | 34.41341200 |
| H  | 18.02937000 | -5.68180900 | 31.95798300 |
| H  | 16.27142400 | -6.53431300 | 32.71779100 |
| H  | -6.03216100 | -0.10942500 | 1.05813300  |

## A

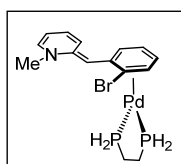

Zero-point correction= 0.310802 (Hartree/Particle)  
 Thermal correction to Energy= 0.333785  
 Thermal correction to Enthalpy= 0.334729  
 Thermal correction to Gibbs Free Energy= 0.254496  
 Sum of electronic and zero-point Energies= -4018.910105  
 Sum of electronic and thermal Energies= -4018.887122  
 Sum of electronic and thermal Enthalpies= -4018.886177  
 Sum of electronic and thermal Free Energies= -4018.966411  
 Electronic energy (RM06) -4021.53443461

|    |             |             |             |
|----|-------------|-------------|-------------|
| C  | 1.24002400  | 1.74447500  | -1.42276900 |
| C  | 0.60556100  | 2.99391600  | -1.21703700 |
| C  | -0.76846200 | 3.04818200  | -1.06236800 |
| C  | -1.54148600 | 1.87547700  | -1.10710500 |
| C  | -0.98082500 | 0.60215800  | -1.28487600 |
| C  | 0.45175200  | 0.56566600  | -1.42814800 |
| H  | 2.26757100  | 1.70714400  | -1.76604200 |
| H  | 1.20580900  | 3.89933900  | -1.22498300 |
| H  | -1.26614600 | 4.00682800  | -0.94066900 |
| H  | -2.62237200 | 1.95794100  | -1.05204400 |
| C  | -1.77887100 | -0.61202300 | -1.38490600 |
| H  | -1.38119800 | -1.35576600 | -2.06173400 |
| C  | -2.91768300 | -0.91337700 | -0.67383400 |
| C  | -3.43755100 | -0.14829500 | 0.44345200  |
| C  | -4.56323100 | -0.50501200 | 1.11730200  |
| H  | -2.86122900 | 0.71325600  | 0.75557900  |
| C  | -4.79991900 | -2.42366600 | -0.28613900 |
| C  | -5.29481700 | -1.67640800 | 0.73502100  |
| H  | -5.27917500 | -3.33711500 | -0.62092900 |
| H  | -6.20177300 | -1.98012200 | 1.24337900  |
| Pd | 1.52188600  | 0.59078600  | 0.62043700  |
| C  | 2.19292800  | -1.05578600 | 3.48466600  |
| H  | 1.85457400  | -1.50066900 | 4.42658800  |
| H  | 2.97025200  | -1.71385500 | 3.07569000  |
| C  | 2.77569000  | 0.34602300  | 3.73637400  |
| H  | 2.02890600  | 0.97745300  | 4.23448300  |

|    |             |             |             |
|----|-------------|-------------|-------------|
| H  | 3.64365600  | 0.28387700  | 4.40158200  |
| P  | 0.80100100  | -1.02800300 | 2.20992700  |
| P  | 3.22181000  | 1.22585900  | 2.12602100  |
| Br | 1.29701300  | -1.01665500 | -2.21448300 |
| C  | -3.20211100 | -2.94829800 | -2.05322900 |
| H  | -2.21794600 | -3.37438600 | -1.82376900 |
| H  | -3.91647200 | -3.76125500 | -2.19342300 |
| H  | -3.11806100 | -2.37644000 | -2.98495500 |
| N  | -3.65951200 | -2.08651800 | -0.97347300 |
| H  | -0.29196600 | -0.77534800 | 3.08655700  |
| H  | 0.58002200  | -2.43242500 | 2.13747400  |
| H  | 3.62910200  | 2.46736500  | 2.69365900  |
| H  | 4.54388800  | 0.72532700  | 1.96173100  |
| H  | -4.89811500 | 0.08871200  | 1.96351700  |

## ATS

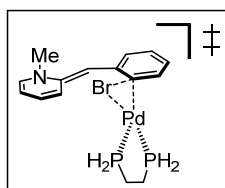

Zero-point correction= 0.310274 (Hartree/Particle)  
 Thermal correction to Energy= 0.332765  
 Thermal correction to Enthalpy= 0.333709  
 Thermal correction to Gibbs Free Energy= 0.254956  
 Sum of electronic and zero-point Energies= -4018.898072  
 Sum of electronic and thermal Energies= -4018.875580  
 Sum of electronic and thermal Enthalpies= -4018.874636  
 Sum of electronic and thermal Free Energies= -4018.953389  
 Electronic energy (RM06) -4021.52040836

|    |             |             |             |
|----|-------------|-------------|-------------|
| C  | 0.70306800  | 2.53820100  | -1.25644200 |
| C  | -0.12682500 | 3.66549600  | -1.20907800 |
| C  | -1.50670600 | 3.49233400  | -1.12769100 |
| C  | -2.05642100 | 2.20802200  | -1.07778300 |
| C  | -1.26667000 | 1.04012300  | -1.06079200 |
| C  | 0.14243300  | 1.26130600  | -1.10980400 |
| H  | 1.77124700  | 2.64367500  | -1.41604800 |
| H  | 0.30791700  | 4.65850300  | -1.28548000 |
| H  | -2.16826100 | 4.35447900  | -1.14759800 |
| H  | -3.13689700 | 2.10027100  | -1.08981200 |
| C  | -1.80394000 | -0.31085100 | -1.03335800 |
| H  | -1.17704600 | -1.03427800 | -1.53780600 |
| C  | -2.95226400 | -0.75104500 | -0.41596200 |
| C  | -3.76664900 | 0.02016800  | 0.50377400  |
| C  | -4.87886100 | -0.48429800 | 1.10223000  |
| H  | -3.42705300 | 1.02079600  | 0.73786700  |
| C  | -4.52899800 | -2.57297800 | -0.00247600 |
| C  | -5.29951400 | -1.82682200 | 0.83255400  |
| H  | -4.76584500 | -3.60422800 | -0.24075500 |
| H  | -6.18793300 | -2.25320900 | 1.28203900  |
| Pd | 1.47449000  | 0.45032500  | 0.35402300  |
| C  | 1.41797300  | -0.95574100 | 3.47818600  |
| H  | 1.00391100  | -1.01371200 | 4.49033700  |
| H  | 1.61450700  | -1.98405900 | 3.14931100  |
| C  | 2.72788400  | -0.14854700 | 3.48520100  |
| H  | 2.54502000  | 0.85580100  | 3.88749400  |

|    |             |             |             |
|----|-------------|-------------|-------------|
| H  | 3.47005500  | -0.62756500 | 4.13255900  |
| P  | 0.15343800  | -0.24592500 | 2.27245500  |
| P  | 3.40272200  | 0.09763300  | 1.74531400  |
| Br | 1.37496100  | -0.25754600 | -2.20931800 |
| C  | -2.63565800 | -2.95901200 | -1.49120100 |
| H  | -1.62683300 | -3.13177600 | -1.09742800 |
| H  | -3.15015000 | -3.91693800 | -1.58373400 |
| H  | -2.54003600 | -2.50192800 | -2.48284700 |
| N  | -3.39710900 | -2.08750600 | -0.60776500 |
| H  | -0.46931800 | 0.70091600  | 3.13320300  |
| H  | -0.84977000 | -1.24003100 | 2.43398200  |
| H  | 4.46886200  | 0.98461000  | 2.05303700  |
| H  | 4.21464000  | -1.06331400 | 1.63294400  |
| H  | -5.44033900 | 0.12743100  | 1.80316200  |

## B

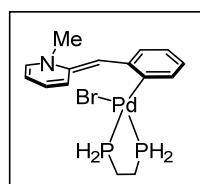

Zero-point correction= 0.312531 (Hartree/Particle)  
 Thermal correction to Energy= 0.335117  
 Thermal correction to Enthalpy= 0.336062  
 Thermal correction to Gibbs Free Energy= 0.257363  
 Sum of electronic and zero-point Energies= -4018.937821  
 Sum of electronic and thermal Energies= -4018.915235  
 Sum of electronic and thermal Enthalpies= -4018.914291  
 Sum of electronic and thermal Free Energies= -4018.992989  
 Electronic energy (RM06) -4021.56804238

|    |             |             |             |
|----|-------------|-------------|-------------|
| C  | 0.28240200  | 3.02432100  | -0.93834500 |
| C  | -0.67866600 | 3.99111400  | -1.26049100 |
| C  | -2.00460800 | 3.60203900  | -1.45048200 |
| C  | -2.36331900 | 2.26062600  | -1.32553100 |
| C  | -1.41830900 | 1.26781500  | -0.98560800 |
| C  | -0.07942800 | 1.68386900  | -0.80536900 |
| H  | 1.31842200  | 3.32575400  | -0.80350100 |
| H  | -0.38629400 | 5.03283200  | -1.36890300 |
| H  | -2.75867300 | 4.33842300  | -1.71789900 |
| H  | -3.38749800 | 1.96083800  | -1.53208300 |
| C  | -1.75722200 | -0.16134200 | -0.91004500 |
| H  | -1.01637800 | -0.80558400 | -1.36783300 |
| C  | -2.88622500 | -0.71707700 | -0.36207600 |
| C  | -3.88255800 | 0.00440400  | 0.41084500  |
| C  | -4.96948900 | -0.60179000 | 0.95570600  |
| H  | -3.70763400 | 1.06246700  | 0.56279900  |
| C  | -4.24808900 | -2.70189700 | 0.06883500  |
| C  | -5.17920800 | -2.00996400 | 0.77641400  |
| H  | -4.32833400 | -3.77001600 | -0.10305900 |
| H  | -6.04135400 | -2.52009800 | 1.18842700  |
| Pd | 1.35078400  | 0.31052100  | -0.27665600 |
| C  | 1.66347400  | -0.46347100 | 3.02403500  |
| H  | 1.72401400  | -0.09713000 | 4.05441200  |
| H  | 0.99916500  | -1.33630300 | 3.02695200  |
| C  | 3.05813300  | -0.85711300 | 2.49768500  |
| H  | 3.75247800  | -0.01561300 | 2.61158600  |
| H  | 3.46486500  | -1.69350300 | 3.07484500  |

|    |             |             |             |
|----|-------------|-------------|-------------|
| P  | 0.85721500  | 0.80478300  | 1.90311300  |
| P  | 2.99100500  | -1.24128600 | 0.65813000  |
| Br | 1.80021600  | -0.25854700 | -2.67701700 |
| C  | -2.19584800 | -2.92659300 | -1.23475400 |
| H  | -1.21038900 | -2.92880000 | -0.75151500 |
| H  | -2.56785800 | -3.95120400 | -1.29069700 |
| H  | -2.07015100 | -2.53075800 | -2.24915100 |
| N  | -3.13956800 | -2.11176400 | -0.48574500 |
| H  | 1.30649500  | 2.03021400  | 2.44862500  |
| H  | -0.47380800 | 0.83555300  | 2.36703000  |
| H  | 4.36498200  | -1.30908300 | 0.33303900  |
| H  | 2.72894500  | -2.63301500 | 0.66353100  |
| H  | -5.67766600 | -0.02101400 | 1.54074400  |

## B TS

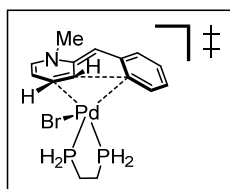

Zero-point correction= 0.310421 (Hartree/Particle)  
 Thermal correction to Energy= 0.332788  
 Thermal correction to Enthalpy= 0.333732  
 Thermal correction to Gibbs Free Energy= 0.255726  
 Sum of electronic and zero-point Energies= -4018.896292  
 Sum of electronic and thermal Energies= -4018.873925  
 Sum of electronic and thermal Enthalpies= -4018.872981  
 Sum of electronic and thermal Free Energies= -4018.950987  
 Electronic energy (RM06) -4021.52105763

|    |             |             |             |
|----|-------------|-------------|-------------|
| C  | -0.42637600 | 2.24816000  | 0.06925600  |
| C  | -0.50792200 | 3.56518400  | 0.53485100  |
| C  | 0.59493300  | 4.16748600  | 1.14914900  |
| C  | 1.79867100  | 3.47554500  | 1.26063800  |
| C  | 1.89710000  | 2.14882600  | 0.80778000  |
| C  | 0.73842300  | 1.51611600  | 0.30013300  |
| H  | -1.29953500 | 1.78181700  | -0.37728500 |
| H  | -1.44535500 | 4.10736900  | 0.44370700  |
| H  | 0.52365300  | 5.19011500  | 1.50953100  |
| H  | 2.68166900  | 3.97032700  | 1.65860000  |
| C  | 3.13668200  | 1.40079800  | 0.69148000  |
| H  | 4.01813900  | 1.65660500  | 1.26784000  |
| C  | 3.06042900  | 0.36374300  | -0.18211500 |
| C  | 1.79473300  | 0.24810600  | -0.95492500 |
| C  | 1.33618300  | -1.06604400 | -1.30618300 |
| H  | 1.59452300  | 1.04984300  | -1.66015800 |
| C  | 3.56972300  | -1.90358500 | -0.77301400 |
| C  | 2.30377700  | -2.15735900 | -1.17575800 |
| H  | 4.33179600  | -2.67524300 | -0.74840500 |
| H  | 2.03638000  | -3.15959500 | -1.49092900 |
| C  | 5.30235600  | -0.50323800 | 0.27202100  |
| H  | 5.76098200  | 0.44805000  | -0.01599000 |
| H  | 5.95869800  | -1.31635600 | -0.04547400 |
| H  | 5.20676100  | -0.52685800 | 1.36771500  |
| N  | 4.01060900  | -0.64478700 | -0.37910500 |
| Br | -0.90857100 | -0.18709200 | 2.78267600  |
| C  | -3.01216300 | -4.33341200 | 1.34040100  |
| C  | -2.52792100 | -2.94048900 | 0.91993900  |

|    |             |             |             |
|----|-------------|-------------|-------------|
| H  | -2.64080800 | -5.10207600 | 0.65437000  |
| H  | -2.62775200 | -4.57128900 | 2.33927600  |
| H  | -2.83863000 | -2.16818000 | 1.63118700  |
| H  | -2.93129400 | -2.65782100 | -0.06089800 |
| P  | -4.89818900 | -4.39377300 | 1.45790400  |
| H  | -5.01174500 | -5.81050500 | 1.57444800  |
| H  | -5.15275800 | -4.40815700 | 0.05407300  |
| P  | -0.68317300 | -2.77199000 | 0.79601200  |
| H  | -0.38187600 | -3.82169700 | -0.11486300 |
| H  | -0.24559700 | -3.40722100 | 1.97666000  |
| Pd | 0.21269200  | -0.63068700 | 0.49424700  |
| H  | 0.61489100  | -1.14368300 | -2.11852000 |

### C-anti

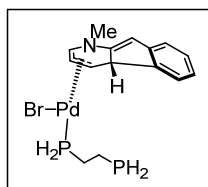

Zero-point correction= 0.313591 (Hartree/Particle)  
 Thermal correction to Energy= 0.335423  
 Thermal correction to Enthalpy= 0.336367  
 Thermal correction to Gibbs Free Energy= 0.260643  
 Sum of electronic and zero-point Energies= -4018.957186  
 Sum of electronic and thermal Energies= -4018.935353  
 Sum of electronic and thermal Enthalpies= -4018.934409  
 Sum of electronic and thermal Free Energies= -4019.010133  
 Electronic energy (RM06) -4021.59093412

|    |             |             |             |
|----|-------------|-------------|-------------|
| C  | 0.57867300  | 2.05648900  | -1.50664800 |
| C  | 0.74436600  | 3.35867600  | -1.00998400 |
| C  | 1.83553600  | 3.66958800  | -0.19223100 |
| C  | 2.77623900  | 2.69408600  | 0.15628800  |
| C  | 2.60913500  | 1.39098400  | -0.32525100 |
| C  | 1.50558400  | 1.08370200  | -1.16168800 |
| H  | -0.26707700 | 1.81558800  | -2.14598500 |
| H  | 0.02130000  | 4.12870200  | -1.26448000 |
| H  | 1.95561400  | 4.68439000  | 0.17935400  |
| H  | 3.62116500  | 2.94788500  | 0.79236700  |
| C  | 3.37946600  | 0.17396000  | -0.08103300 |
| H  | 4.25368600  | 0.11534300  | 0.55715800  |
| C  | 2.78491300  | -0.85394400 | -0.75427700 |
| C  | 1.61991100  | -0.36060400 | -1.59469200 |
| C  | 0.43426500  | -1.32216200 | -1.61175400 |
| H  | 1.99650200  | -0.35013500 | -2.63772900 |
| C  | 2.14834800  | -3.08587300 | -1.30819400 |
| C  | 0.90085300  | -2.71132100 | -1.68928700 |
| H  | 2.48803100  | -4.11449300 | -1.36377200 |
| H  | 0.21808000  | -3.46916900 | -2.05845400 |
| C  | 4.29282200  | -2.67210500 | -0.13182100 |
| H  | 4.19247000  | -2.61592900 | 0.96225600  |
| H  | 4.47481300  | -3.71189600 | -0.41280800 |
| H  | 5.15798100  | -2.06941400 | -0.42903600 |
| N  | 3.10048000  | -2.19067100 | -0.80645100 |
| Br | -2.76299300 | -2.02044200 | -1.70577700 |
| C  | -0.63911400 | -0.39152000 | 3.24320000  |
| C  | -1.77348900 | -1.41982700 | 3.40184400  |

|    |             |             |             |
|----|-------------|-------------|-------------|
| H  | -0.02298200 | -0.34454900 | 4.14771900  |
| H  | -1.05653700 | 0.61011400  | 3.08203900  |
| H  | -1.35973600 | -2.39478000 | 3.68767700  |
| H  | -2.46614300 | -1.11504600 | 4.19289800  |
| P  | 0.42978000  | -0.75044000 | 1.74232900  |
| H  | 1.29556800  | 0.35986400  | 1.75900900  |
| H  | 1.31787400  | -1.72140600 | 2.26655400  |
| P  | -2.63769400 | -1.66429500 | 1.75465300  |
| H  | -3.41789400 | -2.81751300 | 1.99784300  |
| H  | -3.67736400 | -0.70736300 | 1.81961500  |
| Pd | -0.96782900 | -1.40844800 | 0.00756200  |
| H  | -0.28140400 | -1.06721100 | -2.39175600 |

### C': allyl cation

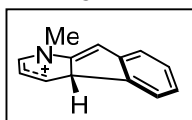

|                                              |                             |
|----------------------------------------------|-----------------------------|
| Zero-point correction=                       | 0.217297 (Hartree/Particle) |
| Thermal correction to Energy=                | 0.227973                    |
| Thermal correction to Enthalpy=              | 0.228918                    |
| Thermal correction to Gibbs Free Energy=     | 0.181054                    |
| Sum of electronic and zero-point Energies=   | -556.886908                 |
| Sum of electronic and thermal Energies=      | -556.876232                 |
| Sum of electronic and thermal Enthalpies=    | -556.875288                 |
| Sum of electronic and thermal Free Energies= | -556.923151                 |
| Electronic energy (RM06)                     | -556.88129527               |

|   |             |             |             |
|---|-------------|-------------|-------------|
| C | -2.26770600 | 1.33078100  | 0.23898600  |
| C | -3.51964700 | 0.74177500  | 0.01444200  |
| C | -3.64232100 | -0.63496500 | -0.22031600 |
| C | -2.51808700 | -1.45785300 | -0.24689500 |
| C | -1.26208700 | -0.87268000 | -0.04370400 |
| C | -1.14501000 | 0.52013800  | 0.19364300  |
| H | -2.19347900 | 2.39766200  | 0.43105800  |
| H | -4.40947600 | 1.36372900  | 0.02150300  |
| H | -4.62641600 | -1.06398600 | -0.38058300 |
| H | -2.61515000 | -2.52591900 | -0.41739000 |
| C | 0.05953200  | -1.47100200 | -0.05694300 |
| H | 0.25697500  | -2.51980000 | -0.24708300 |
| C | 0.97662200  | -0.49461500 | 0.17488900  |
| C | 0.31363300  | 0.83585600  | 0.46206700  |
| C | 1.06754300  | 1.95711400  | -0.18770500 |
| H | 0.37015500  | 1.04038600  | 1.55203900  |
| C | 3.04691100  | 0.55773200  | -0.15754900 |
| C | 2.40000800  | 1.81422200  | -0.39391400 |
| H | 4.12529500  | 0.46428600  | -0.22430200 |
| H | 3.01582100  | 2.63240200  | -0.75085200 |
| C | 3.04205500  | -1.86781300 | 0.12818100  |
| H | 2.74902000  | -2.45264400 | -0.74743600 |
| H | 4.12148400  | -1.71878600 | 0.12039400  |
| H | 2.74357700  | -2.38945600 | 1.03928400  |
| N | 2.36944300  | -0.55407700 | 0.08154500  |
| H | 0.56743100  | 2.89852600  | -0.39853000 |



## C': anion

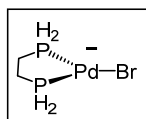

Zero-point correction= 0.092931 (Hartree/Particle)  
Thermal correction to Energy= 0.103122  
Thermal correction to Enthalpy= 0.104067  
Thermal correction to Gibbs Free Energy= 0.053845  
Sum of electronic and zero-point Energies= -3461.902898  
Sum of electronic and thermal Energies= -3461.892707  
Sum of electronic and thermal Enthalpies= -3461.891763  
Sum of electronic and thermal Free Energies= -3461.941985  
Electronic energy (RM06) -3464.64779574

|    |             |             |             |
|----|-------------|-------------|-------------|
| C  | -3.10034500 | -0.70374900 | 0.30675000  |
| H  | -3.97186400 | -1.27425400 | -0.03852400 |
| H  | -3.17333300 | -0.62881000 | 1.40040100  |
| C  | -3.10013800 | 0.70343900  | -0.30774400 |
| H  | -3.17206300 | 0.62847800  | -1.40147200 |
| H  | -3.97210600 | 1.27381600  | 0.03663800  |
| P  | -1.47926600 | -1.64002700 | -0.04697500 |
| P  | -1.47958100 | 1.64007900  | 0.04719400  |
| H  | -1.88196200 | -2.19721800 | -1.30634700 |
| H  | -1.88531800 | -2.82350000 | 0.67254100  |
| H  | -1.88554400 | 2.82356200  | -0.67236300 |
| H  | -1.88317800 | 2.19696300  | 1.30642200  |
| Pd | 0.13881500  | 0.00003100  | 0.00029000  |
| Br | 2.77215600  | 0.00001800  | -0.00022800 |

## C-syn

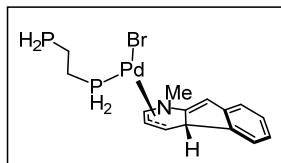

Zero-point correction= 0.313708 (Hartree/Particle)  
Thermal correction to Energy= 0.335555  
Thermal correction to Enthalpy= 0.336499  
Thermal correction to Gibbs Free Energy= 0.260941  
Sum of electronic and zero-point Energies= -4018.946794  
Sum of electronic and thermal Energies= -4018.924947  
Sum of electronic and thermal Enthalpies= -4018.924003  
Sum of electronic and thermal Free Energies= -4018.999561  
Electronic energy (RM06) -4021.57966574

|   |             |            |             |
|---|-------------|------------|-------------|
| C | -0.67473200 | 2.31714400 | 0.88526300  |
| C | -0.75366700 | 3.69996800 | 1.10453200  |
| C | 0.33231600  | 4.53004300 | 0.80820700  |
| C | 1.52069900  | 4.00040300 | 0.29635000  |
| C | 1.61091400  | 2.62072300 | 0.09609200  |
| C | 0.50663500  | 1.78363500 | 0.39112400  |
| H | -1.52829900 | 1.67954800 | 1.10447600  |
| H | -1.66769400 | 4.13001400 | 1.50498100  |
| H | 0.25159300  | 5.60064500 | 0.97737600  |
| H | 2.35988800  | 4.65185500 | 0.06559100  |
| C | 2.72641100  | 1.79371000 | -0.36083300 |
| H | 3.71278900  | 2.17107900 | -0.60590300 |
| C | 2.32859300  | 0.50095400 | -0.35462300 |

|    |             |             |             |
|----|-------------|-------------|-------------|
| C  | 0.85881300  | 0.37227400  | -0.02315200 |
| C  | 0.58631100  | -0.82572700 | 0.88208300  |
| H  | 0.36974700  | 0.19288600  | -1.00046900 |
| C  | 2.73119200  | -1.75199500 | 0.19926200  |
| C  | 1.65623600  | -1.72936700 | 1.12014300  |
| H  | 3.41751200  | -2.59087700 | 0.16113200  |
| H  | 1.63083200  | -2.46314900 | 1.91855000  |
| C  | 4.05815400  | -0.76454800 | -1.61978800 |
| H  | 4.68500300  | 0.13040500  | -1.63524100 |
| H  | 4.69461600  | -1.63789800 | -1.45474400 |
| H  | 3.51838300  | -0.86825600 | -2.56745300 |
| N  | 3.08529000  | -0.66775600 | -0.53055000 |
| C  | -1.08693500 | -5.01253700 | -2.39776400 |
| C  | -1.96233000 | -3.76991300 | -2.62427900 |
| H  | -1.00475700 | -5.59567600 | -3.32075600 |
| H  | -1.53844500 | -5.66566700 | -1.64031400 |
| H  | -1.56403500 | -3.17307200 | -3.45018100 |
| H  | -2.99307200 | -4.05992000 | -2.85488600 |
| P  | 0.62154100  | -4.56953900 | -1.74904700 |
| H  | 1.03002000  | -5.86093900 | -1.31322900 |
| H  | 1.39738200  | -4.51393500 | -2.92432100 |
| P  | -1.90649800 | -2.62860600 | -1.14311700 |
| H  | -2.55970800 | -1.48082200 | -1.64018800 |
| H  | -2.98423600 | -3.13431300 | -0.36276600 |
| Pd | 0.36933700  | -2.56827700 | -0.45272600 |
| Br | 0.63007500  | -1.33755900 | -3.23851500 |
| H  | -0.20971000 | -0.74475100 | 1.61609400  |

## C-TS

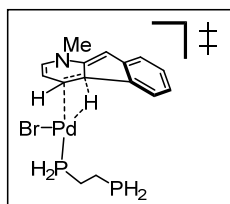

Zero-point correction= 0.306723 (Hartree/Particle)  
 Thermal correction to Energy= 0.329497  
 Thermal correction to Enthalpy= 0.330441  
 Thermal correction to Gibbs Free Energy= 0.250076  
 Sum of electronic and zero-point Energies= -4018.939116  
 Sum of electronic and thermal Energies= -4018.916343  
 Sum of electronic and thermal Enthalpies= -4018.915399  
 Sum of electronic and thermal Free Energies= -4018.995763  
 Electronic energy (RM06) -4021.55586957

|   |             |            |             |
|---|-------------|------------|-------------|
| C | -0.23336300 | 2.36614300 | -0.31833900 |
| C | -0.17856200 | 3.70280800 | -0.71839300 |
| C | 1.04281300  | 4.27805600 | -1.10422500 |
| C | 2.22711500  | 3.54200300 | -1.09120200 |
| C | 2.19020500  | 2.20314000 | -0.67729300 |
| C | 0.94765000  | 1.62900500 | -0.29330000 |
| H | -1.17954200 | 1.90941000 | -0.03842700 |
| H | -1.08615500 | 4.29907800 | -0.73562300 |
| H | 1.06506300  | 5.31789000 | -1.42049200 |
| H | 3.16471200  | 4.00221200 | -1.39240700 |
| C | 3.25181900  | 1.22296200 | -0.52236100 |
| H | 4.30244900  | 1.41190500 | -0.70125900 |
| C | 2.69425800  | 0.06566000 | -0.05341700 |
| C | 1.20535700  | 0.21385600 | 0.05676800  |

|    |             |             |             |
|----|-------------|-------------|-------------|
| C  | 0.51560200  | -0.63431800 | 0.99471200  |
| H  | 0.92274500  | -0.43835700 | -1.27915500 |
| C  | 2.53445900  | -2.00504100 | 1.11942500  |
| C  | 1.23366200  | -1.78564300 | 1.47647600  |
| H  | 3.07234900  | -2.89220400 | 1.43300300  |
| H  | 0.72111400  | -2.51219100 | 2.09465300  |
| C  | 4.71203900  | -1.27248800 | 0.21198600  |
| H  | 5.25524800  | -0.53263900 | 0.81387600  |
| H  | 5.00313300  | -2.27533500 | 0.52890800  |
| H  | 4.98459700  | -1.13523400 | -0.83968300 |
| N  | 3.27382700  | -1.10991100 | 0.37424000  |
| Br | -2.34761300 | -2.55966900 | 0.22866100  |
| C  | -2.72132600 | -1.75712900 | -3.47850300 |
| C  | -3.21295200 | -2.46592100 | -4.74554800 |
| H  | -3.33389600 | -2.00674800 | -2.60480200 |
| H  | -2.75904700 | -0.66648500 | -3.59008200 |
| H  | -2.55925800 | -2.22948300 | -5.59425400 |
| H  | -3.19178600 | -3.55180400 | -4.60793800 |
| P  | -0.98636000 | -2.17790300 | -2.97129100 |
| H  | -0.98117500 | -3.58531700 | -3.09753500 |
| H  | -0.26841000 | -1.87641200 | -4.15603600 |
| P  | -4.94561500 | -1.87917400 | -5.22220100 |
| H  | -5.20392700 | -2.88883700 | -6.19492700 |
| H  | -5.65116000 | -2.56649400 | -4.19289800 |
| Pd | -0.34113200 | -1.41295900 | -0.87546700 |
| H  | -0.37640100 | -0.29072600 | 1.50850300  |

## D

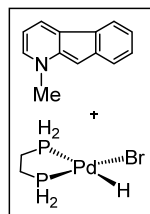

Zero-point correction= 0.309016 (Hartree/Particle)  
 Thermal correction to Energy= 0.332073  
 Thermal correction to Enthalpy= 0.333017  
 Thermal correction to Gibbs Free Energy= 0.237067  
 Sum of electronic and zero-point Energies= -4018.959553  
 Sum of electronic and thermal Energies= -4018.936496  
 Sum of electronic and thermal Enthalpies= -4018.935552  
 Sum of electronic and thermal Free Energies= -4019.031501  
 Electronic energy (RM06) -4021.58182072

|   |            |             |              |
|---|------------|-------------|--------------|
| C | 5.32433600 | -0.56093600 | -12.74970900 |
| C | 5.45997900 | 0.63875200  | -13.44294300 |
| C | 6.64080800 | 0.91525700  | -14.15828500 |
| C | 7.69606500 | 0.00808100  | -14.19371300 |
| C | 7.57908800 | -1.20809700 | -13.50069000 |
| C | 6.37515200 | -1.48453700 | -12.77409900 |
| H | 4.41183700 | -0.77430200 | -12.19679800 |
| H | 4.65272500 | 1.36593500  | -13.43330500 |
| H | 6.72902400 | 1.85761300  | -14.69391200 |
| H | 8.60021900 | 0.23969500  | -14.75192200 |
| C | 8.49450400 | -2.31862200 | -13.36083300 |
| H | 9.47978800 | -2.38141400 | -13.80359600 |
| C | 7.86707900 | -3.25295900 | -12.56743200 |
| C | 6.53443100 | -2.78754300 | -12.16774600 |

|    |              |             |              |
|----|--------------|-------------|--------------|
| C  | 5.74575500   | -3.57706300 | -11.37224600 |
| C  | 7.48610000   | -5.25789300 | -11.33049300 |
| C  | 6.23599400   | -4.84249500 | -10.94459100 |
| H  | 7.90039100   | -6.21340000 | -11.02915600 |
| H  | 5.63716200   | -5.49048500 | -10.31528500 |
| C  | 9.61983500   | -4.94725800 | -12.52273300 |
| H  | 10.37925400  | -4.24189300 | -12.16666500 |
| H  | 9.81411100   | -5.93405400 | -12.09918600 |
| H  | 9.68195600   | -5.00088000 | -13.61554500 |
| N  | 8.29479600   | -4.49244000 | -12.12326000 |
| H  | 4.75519600   | -3.25170800 | -11.06461600 |
| C  | -50.59666600 | 0.41921100  | 0.00398400   |
| H  | -51.50801400 | 0.98850000  | 0.21175500   |
| H  | -50.56286500 | 0.24207400  | -1.07779100  |
| C  | -50.61907800 | -0.92386700 | 0.75856500   |
| H  | -50.78206800 | -0.75347800 | 1.82958300   |
| H  | -51.43554500 | -1.56018300 | 0.40119400   |
| P  | -49.05135000 | 1.40128700  | 0.43177900   |
| P  | -48.97267300 | -1.81107200 | 0.61578800   |
| H  | -49.49076100 | 2.15873900  | 1.54387400   |
| H  | -49.09814400 | 2.43454800  | -0.53127700  |
| H  | -49.11867900 | -2.85989300 | 1.54925700   |
| H  | -49.13219600 | -2.56657800 | -0.56930200  |
| Pd | -47.27853500 | -0.27868600 | 0.71886200   |
| H  | -46.24906400 | -1.43977200 | 0.91587100   |
| Br | -45.30453400 | 1.20742800  | 0.85828800   |

### A+: Pd

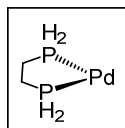

Zero-point correction= 0.094271 (Hartree/Particle)  
 Thermal correction to Energy= 0.101909  
 Thermal correction to Enthalpy= 0.102853  
 Thermal correction to Gibbs Free Energy= 0.061238  
 Sum of electronic and zero-point Energies= -890.391673  
 Sum of electronic and thermal Energies= -890.384035  
 Sum of electronic and thermal Enthalpies= -890.383091  
 Sum of electronic and thermal Free Energies= -890.424706  
 Electronic energy (RM06) -890.44253923

|    |             |             |             |
|----|-------------|-------------|-------------|
| Pd | 15.20412900 | -3.68032800 | 31.49824100 |
| C  | 15.87873400 | -3.80771500 | 34.61811000 |
| H  | 16.18599300 | -3.32828500 | 35.55453000 |
| H  | 15.13514700 | -4.57224500 | 34.87563400 |
| C  | 17.09850800 | -4.46982700 | 33.94640400 |
| H  | 17.87174600 | -3.71599600 | 33.75266600 |
| H  | 17.53520300 | -5.21422000 | 34.62190300 |
| P  | 14.98354800 | -2.56423700 | 33.50582100 |
| P  | 16.70500300 | -5.25484400 | 32.26880300 |
| H  | 15.75627800 | -1.40526800 | 33.79976100 |
| H  | 13.93326500 | -2.23871600 | 34.41341200 |
| H  | 18.02937000 | -5.68180900 | 31.95798300 |
| H  | 16.27142400 | -6.53431300 | 32.71779100 |

## A<sup>+</sup>: pyridinium

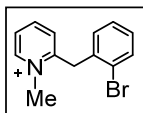

Zero-point correction= 0.231051 (Hartree/Particle)  
Thermal correction to Energy= 0.244034  
Thermal correction to Enthalpy= 0.244978  
Thermal correction to Gibbs Free Energy= 0.189939  
Sum of electronic and zero-point Energies= -3129.226642  
Sum of electronic and thermal Energies= -3129.213659  
Sum of electronic and thermal Enthalpies= -3129.212715  
Sum of electronic and thermal Free Energies= -3129.267754  
Electronic energy (RM06) -3131.54458993

|    |             |             |             |
|----|-------------|-------------|-------------|
| C  | 2.94270000  | 0.26791700  | -0.68956100 |
| C  | 3.74866200  | -0.85387000 | -0.48619600 |
| C  | 3.29918300  | -1.90395100 | 0.31399000  |
| C  | 2.04065300  | -1.83243800 | 0.91179500  |
| C  | 1.21115400  | -0.71920900 | 0.72336200  |
| C  | 1.69008700  | 0.32043200  | -0.08617300 |
| H  | 3.28431700  | 1.09295000  | -1.30464800 |
| H  | 4.72817500  | -0.89808600 | -0.95220200 |
| H  | 3.92665300  | -2.77397200 | 0.47937900  |
| H  | 1.69884800  | -2.64627000 | 1.54677400  |
| C  | -1.30976700 | -0.74337900 | 0.43845800  |
| C  | -1.28467100 | -1.64769000 | -0.62431100 |
| C  | -2.37339900 | -1.78713000 | -1.47582200 |
| H  | -0.38401000 | -2.23257400 | -0.77050200 |
| C  | -3.51020800 | -0.11691900 | -0.20589400 |
| C  | -3.50945200 | -1.00180400 | -1.26258800 |
| H  | -4.35536400 | 0.52312200  | 0.01340800  |
| H  | -4.38266600 | -1.06927300 | -1.90110500 |
| Br | 0.60592200  | 1.87895200  | -0.37854000 |
| C  | -2.51431700 | 1.00695400  | 1.71521900  |
| H  | -1.75048100 | 1.76817300  | 1.54184000  |
| H  | -3.50077300 | 1.46718400  | 1.69518200  |
| H  | -2.36361300 | 0.52383600  | 2.68138700  |
| N  | -2.43905600 | 0.00234500  | 0.62491500  |
| H  | -2.33876000 | -2.49654700 | -2.29661400 |
| C  | -0.14136800 | -0.63483800 | 1.40155000  |
| H  | -0.19740400 | 0.29273400  | 1.97264000  |
| H  | -0.23435000 | -1.45545400 | 2.12598700  |

## For equilibrium constant:

### Me<sub>3</sub>NH<sup>+</sup>

Zero-point correction= 0.136794 (Hartree/Particle)  
Thermal correction to Energy= 0.142400  
Thermal correction to Enthalpy= 0.143344  
Thermal correction to Gibbs Free Energy= 0.109155  
Sum of electronic and zero-point Energies= -174.714269  
Sum of electronic and thermal Energies= -174.708663  
Sum of electronic and thermal Enthalpies= -174.707718  
Sum of electronic and thermal Free Energies= -174.741908  
Electronic energy (RM06) -174.85091861

|   |            |            |             |
|---|------------|------------|-------------|
| C | 0.71505100 | 1.25127200 | 0.10360500  |
| H | 1.73404300 | 1.23145900 | -0.28526300 |
| H | 0.17942400 | 2.11925400 | -0.28321700 |
| H | 0.72796900 | 1.27128300 | 1.19447300  |

|   |             |             |             |
|---|-------------|-------------|-------------|
| C | -1.44124300 | -0.00648300 | 0.10364100  |
| H | -1.93334200 | 0.88678700  | -0.28348900 |
| H | -1.92574100 | -0.90326400 | -0.28497100 |
| H | -1.46501900 | -0.00749200 | 1.19451600  |
| C | 0.72625500  | -1.24480000 | 0.10360100  |
| H | 0.19922400  | -2.11763600 | -0.28412000 |
| H | 1.74540200  | -1.21536500 | -0.28428600 |
| H | 0.73828900  | -1.26513100 | 1.19445700  |
| H | -0.00008300 | 0.00007200  | -1.36576500 |
| N | -0.00007700 | 0.00001400  | -0.33963100 |

## Me<sub>3</sub>N

Zero-point correction= 0.121119 (Hartree/Particle)  
 Thermal correction to Energy= 0.126535  
 Thermal correction to Enthalpy= 0.127480  
 Thermal correction to Gibbs Free Energy= 0.093826  
 Sum of electronic and zero-point Energies= -174.353281  
 Sum of electronic and thermal Energies= -174.347865  
 Sum of electronic and thermal Enthalpies= -174.346920  
 Sum of electronic and thermal Free Energies= -174.380574  
 Electronic energy (RM06) -174.38632433

|   |             |             |             |
|---|-------------|-------------|-------------|
| N | -0.00007600 | 0.00015600  | -0.37151400 |
| C | 1.10008800  | 0.84815800  | 0.06099200  |
| H | 2.04531300  | 0.45839700  | -0.33314600 |
| H | 0.96161800  | 1.86235300  | -0.33005000 |
| H | 1.19307900  | 0.91740500  | 1.16428100  |
| C | -1.28475400 | 0.52837100  | 0.06100200  |
| H | -1.41903200 | 1.54250700  | -0.33160100 |
| H | -2.09369900 | -0.09779200 | -0.33170500 |
| H | -1.39223900 | 0.57223900  | 1.16425900  |
| C | 0.18471300  | -1.37661300 | 0.06091400  |
| H | -0.62659200 | -2.00005300 | -0.33125300 |
| H | 1.13132600  | -1.76435800 | -0.33186200 |
| H | 0.20047900  | -1.49128100 | 1.16423100  |

## Starting material

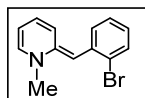

Zero-point correction= 0.217074 (Hartree/Particle)  
 Thermal correction to Energy= 0.230064  
 Thermal correction to Enthalpy= 0.231009  
 Thermal correction to Gibbs Free Energy= 0.176015  
 Sum of electronic and zero-point Energies= -3128.820128  
 Sum of electronic and thermal Energies= -3128.807138  
 Sum of electronic and thermal Enthalpies= -3128.806194  
 Sum of electronic and thermal Free Energies= -3128.861187  
 Electronic energy (RM06) -3131.06727480

|   |             |            |             |
|---|-------------|------------|-------------|
| C | -3.12567100 | 1.01668700 | -0.06071500 |
| C | -3.00854400 | 2.38585700 | 0.17791100  |
| C | -1.75828000 | 2.91361100 | 0.50464400  |
| C | -0.64398600 | 2.08458900 | 0.58081800  |
| C | -0.70814900 | 0.69651200 | 0.31076200  |
| C | -1.99845600 | 0.20408500 | 0.00633100  |
| H | -4.08642900 | 0.57686500 | -0.30577400 |
| H | -3.88612400 | 3.02315800 | 0.12018000  |

|    |             |             |             |
|----|-------------|-------------|-------------|
| H  | -1.65240400 | 3.97299500  | 0.72352600  |
| H  | 0.30542000  | 2.50446500  | 0.89713600  |
| C  | 0.44262100  | -0.19176200 | 0.41561400  |
| H  | 0.20067500  | -1.19366800 | 0.74243100  |
| C  | 1.74854500  | 0.09496700  | 0.09204100  |
| C  | 2.20454400  | 1.28964000  | -0.59102900 |
| C  | 3.51218200  | 1.50929600  | -0.89139200 |
| H  | 1.44728500  | 1.99748100  | -0.90233800 |
| C  | 4.09058700  | -0.59885200 | 0.06745800  |
| C  | 4.50810600  | 0.54499000  | -0.53525500 |
| H  | 4.77679000  | -1.39150000 | 0.34455400  |
| H  | 5.55871200  | 0.69573200  | -0.75100400 |
| Br | -2.25599300 | -1.67129700 | -0.34622800 |
| C  | 2.41880300  | -2.10180300 | 1.01271300  |
| H  | 1.75459200  | -2.69264500 | 0.37114500  |
| H  | 3.32585000  | -2.67568300 | 1.20819900  |
| H  | 1.90120600  | -1.91062000 | 1.95992000  |
| N  | 2.77437000  | -0.84411000 | 0.37088900  |
| H  | 3.79977000  | 2.41069000  | -1.42561100 |

**A+'**

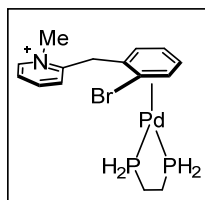

Zero-point correction= 0.325243 (Hartree/Particle)  
 Thermal correction to Energy= 0.348033  
 Thermal correction to Enthalpy= 0.348977  
 Thermal correction to Gibbs Free Energy= 0.269554  
 Sum of electronic and zero-point Energies= -4019.322291  
 Sum of electronic and thermal Energies= -4019.299501  
 Sum of electronic and thermal Enthalpies= -4019.298557  
 Sum of electronic and thermal Free Energies= -4019.377980  
 Electronic energy (RM06) -4022.01352165

|    |             |             |             |
|----|-------------|-------------|-------------|
| C  | -0.92235000 | -2.35515100 | 0.01974300  |
| C  | -1.25223000 | -2.95242500 | 1.27035700  |
| C  | -0.39358500 | -2.86862700 | 2.34585700  |
| C  | 0.85649800  | -2.22504500 | 2.20183500  |
| C  | 1.24041300  | -1.64000900 | 1.00619000  |
| C  | 0.30916100  | -1.63764300 | -0.08343800 |
| H  | -1.44267900 | -2.67524000 | -0.87691400 |
| H  | -2.17859800 | -3.51462500 | 1.34607300  |
| H  | -0.64876500 | -3.33745700 | 3.29089400  |
| H  | 1.54932800  | -2.21793100 | 3.04019500  |
| C  | 2.74228600  | 0.41125500  | 0.74422600  |
| C  | 1.99388600  | 1.23335300  | 1.59149000  |
| C  | 2.15777000  | 2.61275600  | 1.57978000  |
| H  | 1.28911500  | 0.75342700  | 2.26058800  |
| C  | 3.77389400  | 2.35421800  | -0.15887200 |
| C  | 3.06418100  | 3.18453500  | 0.68108100  |
| H  | 4.48745100  | 2.73060200  | -0.88046900 |
| H  | 3.22228200  | 4.25556000  | 0.62829600  |
| Pd | -1.47058000 | -0.18261700 | 0.01987100  |
| C  | -2.93390500 | 2.81392100  | -0.61048000 |
| H  | -3.04111100 | 3.88204000  | -0.39732200 |

|    |             |             |             |
|----|-------------|-------------|-------------|
| H  | -2.94477900 | 2.69650900  | -1.70110800 |
| C  | -4.09101000 | 2.01968100  | 0.01974600  |
| H  | -4.13768500 | 2.21192000  | 1.09865100  |
| H  | -5.04629000 | 2.33917600  | -0.40785600 |
| P  | -1.25888300 | 2.18541200  | -0.02837300 |
| P  | -3.84967700 | 0.16615700  | -0.18578200 |
| Br | 1.00551200  | -1.34627900 | -1.89444200 |
| C  | 4.43388000  | 0.18422400  | -1.05541200 |
| H  | 3.76445300  | -0.39439800 | -1.69484700 |
| H  | 5.03451700  | 0.85601700  | -1.66658500 |
| H  | 5.09454600  | -0.47850000 | -0.49392900 |
| N  | 3.62062600  | 1.00081400  | -0.11891500 |
| H  | -1.12362800 | 2.95038900  | 1.16452000  |
| H  | -0.42251900 | 3.01960000  | -0.81972600 |
| H  | -4.92864600 | -0.30230500 | 0.60550800  |
| H  | -4.47713600 | -0.03199100 | -1.44204000 |
| H  | 1.58657100  | 3.23794400  | 2.25874200  |
| C  | 2.64580300  | -1.09769900 | 0.84839100  |
| H  | 3.12009200  | -1.57521500 | -0.01003200 |
| H  | 3.23309600  | -1.38866700 | 1.73054000  |

### A+TS

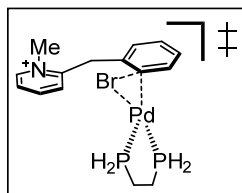

Zero-point correction= 0.324553 (Hartree/Particle)  
 Thermal correction to Energy= 0.346963  
 Thermal correction to Enthalpy= 0.347907  
 Thermal correction to Gibbs Free Energy= 0.270017  
 Sum of electronic and zero-point Energies= -4019.309189  
 Sum of electronic and thermal Energies= -4019.286779  
 Sum of electronic and thermal Enthalpies= -4019.285835  
 Sum of electronic and thermal Free Energies= -4019.363725  
 Electronic energy (RM06) -4021.99782723

|    |             |             |             |
|----|-------------|-------------|-------------|
| C  | -0.67537600 | -2.52611300 | 1.05064300  |
| C  | -0.40419700 | -2.94463600 | 2.35695000  |
| C  | 0.83510600  | -2.68051000 | 2.93713300  |
| C  | 1.81156700  | -2.00429500 | 2.19655200  |
| C  | 1.56559900  | -1.54126400 | 0.90133500  |
| C  | 0.27332600  | -1.74956100 | 0.36126800  |
| H  | -1.60503000 | -2.80436300 | 0.56593400  |
| H  | -1.15443100 | -3.51394100 | 2.89820700  |
| H  | 1.06334300  | -3.03712000 | 3.93636100  |
| H  | 2.79879100  | -1.85225400 | 2.62942300  |
| C  | 2.64105700  | 0.64444700  | 0.11373200  |
| C  | 2.56643000  | 1.34598200  | 1.32055200  |
| C  | 2.64571400  | 2.73109500  | 1.35650000  |
| H  | 2.44905400  | 0.76834700  | 2.23035300  |
| C  | 2.83354700  | 2.72342600  | -1.02312900 |
| C  | 2.77690800  | 3.43531900  | 0.15482100  |
| H  | 2.93570500  | 3.20554400  | -1.98687500 |
| H  | 2.83733700  | 4.51717300  | 0.12650600  |
| Pd | -1.15198100 | -0.11776500 | -0.22232300 |
| C  | -2.69140300 | 2.72614800  | 0.88637900  |
| H  | -3.01323600 | 3.34012100  | 1.73336800  |



|    |             |             |             |
|----|-------------|-------------|-------------|
| H  | -2.33815200 | 3.41106600  | 0.10521000  |
| C  | -3.86843000 | 1.88720500  | 0.36052100  |
| H  | -4.29059100 | 1.28197000  | 1.17181400  |
| H  | -4.66601300 | 2.54180300  | -0.00426900 |
| P  | -1.21233100 | 1.66702800  | 1.37493800  |
| P  | -3.32522900 | 0.68139600  | -0.97208700 |
| Br | 0.11180600  | -1.89232200 | -1.75316600 |
| C  | 2.86426200  | 0.68377700  | -2.35946500 |
| H  | 1.97853900  | 0.06192900  | -2.50366700 |
| H  | 2.90764300  | 1.44695800  | -3.13492500 |
| H  | 3.76911800  | 0.07480900  | -2.40394200 |
| N  | 2.77924100  | 1.36179700  | -1.03978300 |
| H  | -1.60935100 | 1.28596400  | 2.68325900  |
| H  | -0.35351200 | 2.72365700  | 1.80096500  |
| H  | -4.52998600 | -0.04234300 | -1.14883300 |
| H  | -3.45554200 | 1.49310900  | -2.12787000 |
| H  | 2.60542700  | 3.25874600  | 2.30422900  |
| C  | 2.67003100  | -0.87282500 | 0.10646300  |
| H  | 2.65529400  | -1.25873700 | -0.91278800 |
| H  | 3.63737500  | -1.16208200 | 0.53939700  |

## B+

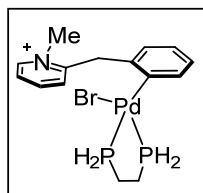

|                                              |                |                    |
|----------------------------------------------|----------------|--------------------|
| Zero-point correction=                       | 0.326992       | (Hartree/Particle) |
| Thermal correction to Energy=                | 0.349325       |                    |
| Thermal correction to Enthalpy=              | 0.350269       |                    |
| Thermal correction to Gibbs Free Energy=     | 0.273014       |                    |
| Sum of electronic and zero-point Energies=   | -4019.358623   |                    |
| Sum of electronic and thermal Energies=      | -4019.336290   |                    |
| Sum of electronic and thermal Enthalpies=    | -4019.335345   |                    |
| Sum of electronic and thermal Free Energies= | -4019.412600   |                    |
| Electronic energy (RM06)                     | -4022.04910639 |                    |

|    |             |             |             |
|----|-------------|-------------|-------------|
| C  | -0.21697700 | 2.98452900  | -0.59353600 |
| C  | 0.58374300  | 4.10630400  | -0.83714600 |
| C  | 1.96451800  | 4.01921100  | -0.68140700 |
| C  | 2.52475000  | 2.81639600  | -0.25301200 |
| C  | 1.72945700  | 1.69020300  | 0.01242600  |
| C  | 0.33291100  | 1.76325300  | -0.17678700 |
| H  | -1.29285900 | 3.08635900  | -0.71038400 |
| H  | 0.12238200  | 5.04048900  | -1.14591400 |
| H  | 2.59943500  | 4.87930200  | -0.87172200 |
| H  | 3.59961000  | 2.75576400  | -0.09273100 |
| C  | 2.48207700  | -0.74459200 | -0.26976800 |
| C  | 2.53994800  | -0.64976200 | -1.66399600 |
| C  | 2.69780000  | -1.77958900 | -2.45520500 |
| H  | 2.46539400  | 0.34069000  | -2.09765700 |
| C  | 2.72157600  | -3.10382100 | -0.46866000 |
| C  | 2.78258200  | -3.03554300 | -1.84406000 |
| H  | 2.78847600  | -4.04081700 | 0.06973900  |
| H  | 2.90377800  | -3.94695100 | -2.41806900 |
| Pd | -1.02806800 | 0.23558800  | 0.16016800  |
| C  | -2.94645800 | -1.04305400 | -2.37714400 |
| H  | -3.51959800 | -0.81496000 | -3.28160100 |

|    |             |             |             |
|----|-------------|-------------|-------------|
| H  | -2.38647300 | -1.96595900 | -2.57105300 |
| C  | -3.87589600 | -1.22514100 | -1.16237200 |
| H  | -4.53070200 | -0.35294100 | -1.05100700 |
| H  | -4.51970200 | -2.09946200 | -1.29735900 |
| P  | -1.67760600 | 0.29410700  | -2.05312600 |
| P  | -2.86562200 | -1.34036900 | 0.41138500  |
| Br | -0.47207800 | 0.02164500  | 2.60793800  |
| C  | 2.54127200  | -2.14506900 | 1.77229300  |
| H  | 1.58260700  | -1.77696900 | 2.15228800  |
| H  | 2.65895100  | -3.20196100 | 2.00755900  |
| H  | 3.36011200  | -1.58060100 | 2.22196300  |
| N  | 2.58264400  | -1.98627700 | 0.29490700  |
| H  | -2.31453500 | 1.47594600  | -2.48882600 |
| H  | -0.76268400 | 0.13256400  | -3.11492900 |
| H  | -3.82671200 | -1.19114500 | 1.43071700  |
| H  | -2.62721300 | -2.72853300 | 0.53559700  |
| H  | 2.76056900  | -1.68837100 | -3.53533900 |
| C  | 2.39518000  | 0.46947700  | 0.61891600  |
| H  | 1.85849800  | 0.22156200  | 1.53804200  |
| H  | 3.42553300  | 0.72247200  | 0.91367100  |

## B+TS

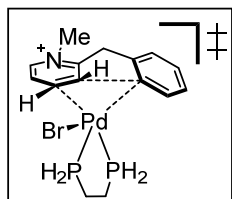

Zero-point correction= 0.324784 (Hartree/Particle)  
 Thermal correction to Energy= 0.346421  
 Thermal correction to Enthalpy= 0.347365  
 Thermal correction to Gibbs Free Energy= 0.273513  
 Sum of electronic and zero-point Energies= -4019.274380  
 Sum of electronic and thermal Energies= -4019.252743  
 Sum of electronic and thermal Enthalpies= -4019.251799  
 Sum of electronic and thermal Free Energies= -4019.325652  
 Electronic energy (RM06) -4021.97557681

|   |             |             |             |
|---|-------------|-------------|-------------|
| C | 0.64168000  | 2.50958800  | -0.77553700 |
| C | 1.15401900  | 3.75161700  | -0.39028100 |
| C | 2.29624200  | 3.83319900  | 0.41236000  |
| C | 2.96272900  | 2.66970800  | 0.80381500  |
| C | 2.46170800  | 1.42060300  | 0.43094400  |
| C | 1.26811500  | 1.34810000  | -0.30776900 |
| H | -0.26123500 | 2.44347800  | -1.37476000 |
| H | 0.65225300  | 4.65720900  | -0.71905100 |
| H | 2.68977100  | 4.80284200  | 0.70209600  |
| H | 3.89155500  | 2.73645300  | 1.36525600  |
| C | 2.53411000  | -0.88285300 | -0.23708900 |
| C | 1.69246800  | -0.32838500 | -1.30184900 |
| C | 0.63157800  | -1.20775400 | -1.75899400 |
| H | 2.16196000  | 0.33055200  | -2.02949400 |
| C | 1.81090500  | -3.09295600 | -0.74253600 |
| C | 0.80232300  | -2.61790900 | -1.52074600 |
| H | 2.00739100  | -4.14278400 | -0.57583100 |
| H | 0.14401600  | -3.32154500 | -2.02009000 |
| C | 3.52514700  | -2.74945000 | 0.98835200  |
| H | 3.05452400  | -2.65648100 | 1.97227500  |
| H | 3.70317100  | -3.80289500 | 0.77313600  |

|    |             |             |             |
|----|-------------|-------------|-------------|
| H  | 4.47924300  | -2.22214200 | 0.98241600  |
| N  | 2.63462200  | -2.20209200 | -0.05384400 |
| Br | -2.39906100 | 0.77243500  | -1.46491400 |
| C  | -2.95319100 | -1.30613400 | 1.95806200  |
| C  | -2.94604100 | 0.22545100  | 2.08228400  |
| H  | -3.97461600 | -1.68157500 | 1.84229200  |
| H  | -2.53509600 | -1.77115000 | 2.85833800  |
| H  | -3.49648500 | 0.67639700  | 1.25150300  |
| H  | -3.40330100 | 0.54093600  | 3.02528700  |
| P  | -1.90130200 | -1.90050100 | 0.52889700  |
| H  | -1.54198100 | -3.20290400 | 0.95478300  |
| H  | -2.79366400 | -2.21740200 | -0.50812900 |
| P  | -1.20830000 | 0.87360800  | 1.92963100  |
| H  | -1.36514100 | 2.26752000  | 1.81723800  |
| H  | -0.70792600 | 0.80147900  | 3.25366300  |
| Pd | -0.27920900 | -0.25761800 | 0.00532200  |
| H  | 0.01880200  | -0.89371500 | -2.59762600 |
| C  | 3.23905600  | 0.13046700  | 0.62246100  |
| H  | 4.28530200  | 0.26270800  | 0.30201500  |
| H  | 3.27875600  | -0.19349400 | 1.67001300  |

## Pd species from Scheme S2.6

### A+ and A: Pd

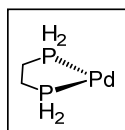

Zero-point correction= 0.094271 (Hartree/Particle)  
 Thermal correction to Energy= 0.101909  
 Thermal correction to Enthalpy= 0.102853  
 Thermal correction to Gibbs Free Energy= 0.061238  
 Sum of electronic and zero-point Energies= -890.391673  
 Sum of electronic and thermal Energies= -890.384035  
 Sum of electronic and thermal Enthalpies= -890.383091  
 Sum of electronic and thermal Free Energies= -890.424706  
 Electronic energy (RM06) -890.44253923

|    |             |             |             |
|----|-------------|-------------|-------------|
| Pd | 15.20412900 | -3.68032800 | 31.49824100 |
| C  | 15.87873400 | -3.80771500 | 34.61811000 |
| H  | 16.18599300 | -3.32828500 | 35.55453000 |
| H  | 15.13514700 | -4.57224500 | 34.87563400 |
| C  | 17.09850800 | -4.46982700 | 33.94640400 |
| H  | 17.87174600 | -3.71599600 | 33.75266600 |
| H  | 17.53520300 | -5.21422000 | 34.62190300 |
| P  | 14.98354800 | -2.56423700 | 33.50582100 |
| P  | 16.70500300 | -5.25484400 | 32.26880300 |
| H  | 15.75627800 | -1.40526800 | 33.79976100 |
| H  | 13.93326500 | -2.23871600 | 34.41341200 |
| H  | 18.02937000 | -5.68180900 | 31.95798300 |
| H  | 16.27142400 | -6.53431300 | 32.71779100 |

### A: neutral base

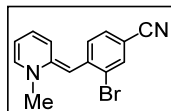

Zero-point correction= 0.215739 (Hartree/Particle)  
 Thermal correction to Energy= 0.230557  
 Thermal correction to Enthalpy= 0.231501

|                                              |                |                                           |              |
|----------------------------------------------|----------------|-------------------------------------------|--------------|
| Thermal correction to Gibbs Free Energy=     | 0.172127       |                                           |              |
| Sum of electronic and zero-point Energies=   | -3221.067300   |                                           |              |
| Sum of electronic and thermal Energies=      | -3221.052483   | Sum of electronic and thermal Enthalpies= | -3221.051539 |
| Sum of electronic and thermal Free Energies= | -3221.110912   |                                           |              |
| Electronic energy (RM06)                     | -3223.28418904 |                                           |              |

|    |             |             |             |
|----|-------------|-------------|-------------|
| C  | 2.82316500  | 0.01753300  | -0.06288900 |
| C  | 3.05801000  | -1.35064900 | 0.15522100  |
| C  | 1.96658600  | -2.18656500 | 0.44994200  |
| C  | 0.68497100  | -1.66595700 | 0.50601400  |
| C  | 0.39607500  | -0.29881000 | 0.25402000  |
| C  | 1.53111100  | 0.51376300  | -0.00940300 |
| H  | 3.65048300  | 0.68268900  | -0.28051000 |
| H  | 2.13701100  | -3.23839700 | 0.65644700  |
| H  | -0.12716400 | -2.32130300 | 0.80017800  |
| C  | -0.93221000 | 0.26711000  | 0.33821300  |
| H  | -0.95092900 | 1.31550000  | 0.60004300  |
| C  | -2.13614000 | -0.35613200 | 0.06815700  |
| C  | -2.29405800 | -1.63883200 | -0.57924300 |
| C  | -3.51470000 | -2.18302700 | -0.84104000 |
| H  | -1.39458500 | -2.14177400 | -0.90861600 |
| C  | -4.57206000 | -0.26291500 | 0.10011000  |
| C  | -4.70663400 | -1.48773200 | -0.47550800 |
| H  | -5.42660200 | 0.34144400  | 0.38230400  |
| H  | -5.69200900 | -1.89611700 | -0.66294300 |
| Br | 1.31853000  | 2.39600200  | -0.32841700 |
| C  | -3.30620800 | 1.61972000  | 0.99231200  |
| H  | -2.84824400 | 2.35445900  | 0.32058300  |
| H  | -4.32187500 | 1.93975600  | 1.22802900  |
| H  | -2.71698000 | 1.57802800  | 1.91476800  |
| N  | -3.35078900 | 0.30214300  | 0.36748900  |
| H  | -3.58104900 | -3.13838400 | -1.35380500 |
| C  | 4.38672700  | -1.87350800 | 0.09258000  |
| N  | 5.46729800  | -2.30499400 | 0.04211000  |

### A+: pyridinium

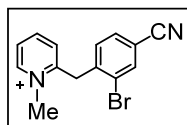

|                                              |                             |
|----------------------------------------------|-----------------------------|
| Zero-point correction=                       | 0.229332 (Hartree/Particle) |
| Thermal correction to Energy=                | 0.244207                    |
| Thermal correction to Enthalpy=              | 0.245151                    |
| Thermal correction to Gibbs Free Energy=     | 0.185565                    |
| Sum of electronic and zero-point Energies=   | -3221.460140                |
| Sum of electronic and thermal Energies=      | -3221.445266                |
| Sum of electronic and thermal Enthalpies=    | -3221.444322                |
| Sum of electronic and thermal Free Energies= | -3221.503908                |
| Electronic energy (RM06)                     | -3223.75513806              |

|   |            |             |             |
|---|------------|-------------|-------------|
| C | 2.47830100 | 0.52891600  | -0.35421700 |
| C | 3.35183500 | -0.51328500 | -0.00328000 |
| C | 2.90529100 | -1.55484000 | 0.82331200  |
| C | 1.59312900 | -1.55034500 | 1.28761000  |
| C | 0.70080000 | -0.52512100 | 0.94731000  |
| C | 1.17434000 | 0.50728200  | 0.12315800  |
| H | 2.82108500 | 1.33951100  | -0.98643900 |
| H | 3.58420300 | -2.35419400 | 1.09912900  |
| H | 1.25711000 | -2.35417700 | 1.93718700  |

|    |             |             |             |
|----|-------------|-------------|-------------|
| C  | -1.76887100 | -0.78171400 | 0.41760300  |
| C  | -1.56036700 | -1.72769300 | -0.58636000 |
| C  | -2.54295700 | -2.00374300 | -1.52975500 |
| H  | -0.60473700 | -2.23809700 | -0.61514700 |
| C  | -3.93970900 | -0.38777400 | -0.46559800 |
| C  | -3.75713900 | -1.31582100 | -1.46872400 |
| H  | -4.85485700 | 0.18136300  | -0.36234100 |
| H  | -4.55337800 | -1.49136100 | -2.18288000 |
| Br | 0.01228800  | 1.94829100  | -0.36672400 |
| C  | -3.24414600 | 0.90508500  | 1.48094800  |
| H  | -2.54164300 | 1.72928400  | 1.34045000  |
| H  | -4.26210900 | 1.26680300  | 1.34619200  |
| H  | -3.14459500 | 0.48076400  | 2.48086000  |
| N  | -2.97124200 | -0.13386400 | 0.45576400  |
| H  | -2.36574500 | -2.74409200 | -2.30349600 |
| C  | -0.71717100 | -0.52148400 | 1.48222700  |
| H  | -0.90284600 | 0.42919700  | 1.98414200  |
| H  | -0.81801600 | -1.30426100 | 2.24606100  |
| C  | 4.69868400  | -0.50505200 | -0.49562700 |
| N  | 5.78886100  | -0.50290300 | -0.89862400 |

### For equilibrium constant:

#### DBU\*H+

|                                              |                             |
|----------------------------------------------|-----------------------------|
| Zero-point correction=                       | 0.262161 (Hartree/Particle) |
| Thermal correction to Energy=                | 0.272130                    |
| Thermal correction to Enthalpy=              | 0.273075                    |
| Thermal correction to Gibbs Free Energy=     | 0.226936                    |
| Sum of electronic and zero-point Energies=   | -462.245820                 |
| Sum of electronic and thermal Energies=      | -462.235851                 |
| Sum of electronic and thermal Enthalpies=    | -462.234906                 |
| Sum of electronic and thermal Free Energies= | -462.281045                 |
| Electronic energy (RM06)                     | -462.35360677               |

|   |             |             |             |
|---|-------------|-------------|-------------|
| C | -0.27016400 | 0.71619100  | -0.40897100 |
| C | 2.08651000  | -0.05951400 | 1.09699500  |
| C | 2.03915400  | -1.34582800 | 0.25601600  |
| C | 1.01040100  | -1.30016600 | -0.89049000 |
| H | 1.21155400  | -0.03060800 | 1.75992200  |
| H | 1.82150900  | -2.19154400 | 0.91812700  |
| H | 2.95485800  | -0.10721300 | 1.76237200  |
| H | 3.01794700  | -1.54855800 | -0.19451300 |
| H | 0.72981600  | -2.30550000 | -1.21182500 |
| H | 1.42475000  | -0.80016400 | -1.76949000 |
| C | -1.43487100 | -1.43364300 | -0.21327200 |
| H | -1.08130800 | -2.36498100 | 0.23622000  |
| H | -1.92856300 | -1.68603000 | -1.15954000 |
| C | -2.38655400 | -0.70894800 | 0.73673900  |
| H | -3.32129300 | -1.27074600 | 0.81400200  |
| H | -1.94678400 | -0.65920700 | 1.73885300  |
| C | -2.66745800 | 0.70250600  | 0.22747400  |
| H | -3.28261200 | 0.68660100  | -0.67999400 |
| H | -3.18790800 | 1.30132100  | 0.97874900  |
| N | -0.24398500 | -0.60706400 | -0.51346100 |
| C | 2.15629800  | 1.25697800  | 0.30511700  |
| H | 3.08982300  | 1.30710600  | -0.26504300 |
| H | 2.18889300  | 2.08223400  | 1.02316300  |
| C | 0.97646600  | 1.51874400  | -0.68772600 |
| H | 1.28412200  | 1.29208700  | -1.71454700 |
| H | 0.71448800  | 2.58082900  | -0.68523800 |
| H | -1.33980600 | 2.36886300  | -0.02062900 |

N -1.38575400 1.35957500 -0.06680800

## DBU

Zero-point correction= 0.247318 (Hartree/Particle)  
Thermal correction to Energy= 0.257186  
Thermal correction to Enthalpy= 0.258130  
Thermal correction to Gibbs Free Energy= 0.211823  
Sum of electronic and zero-point Energies= -461.841935  
Sum of electronic and thermal Energies= -461.832067  
Sum of electronic and thermal Enthalpies= -461.831123  
Sum of electronic and thermal Free Energies= -461.877431  
Electronic energy (RM06) -461.87327751

C -0.32539300 -0.78608600 0.39941300  
C 2.03561400 0.07821900 -1.09615300  
C 1.98795100 1.35530700 -0.24275500  
C 0.95450100 1.28024300 0.90425900  
H 1.13706700 0.04314500 -1.72459400  
H 1.75550500 2.20479500 -0.89868800  
H 2.88495400 0.14489800 -1.78815900  
H 2.97337800 1.56350900 0.19673200  
H 0.68946500 2.28852600 1.24049800  
H 1.40334900 0.78622800 1.77233400  
C -1.44498200 1.41081500 0.19013600  
H -1.09392300 2.33470900 -0.28711500  
H -1.99141300 1.70820100 1.09939800  
C -2.37163100 0.64496500 -0.75323400  
H -3.31710400 1.18780100 -0.86923600  
H -1.90754500 0.57601700 -1.74540900  
C -2.59695500 -0.76855200 -0.20545500  
H -3.19240200 -0.71605600 0.72063700  
H -3.18909800 -1.36011100 -0.91470100  
N -0.28333500 0.59464300 0.54635900  
N -1.35409000 -1.48355500 0.05966000  
C 2.13184400 -1.24404500 -0.31562900  
H 3.08772000 -1.28905200 0.22298400  
H 2.15810900 -2.05673100 -1.05103000  
C 0.97098900 -1.52391900 0.68630700  
H 1.29619700 -1.28999000 1.70779400  
H 0.71608100 -2.58518600 0.67507900

## A''

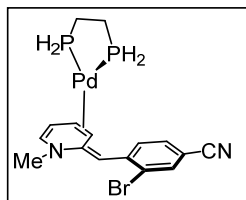

Zero-point correction= 0.310417 (Hartree/Particle)  
Thermal correction to Energy= 0.334784  
Thermal correction to Enthalpy= 0.335728  
Thermal correction to Gibbs Free Energy= 0.252038  
Sum of electronic and zero-point Energies= -4111.168004  
Sum of electronic and thermal Energies= -4111.143637  
Sum of electronic and thermal Enthalpies= -4111.142693  
Sum of electronic and thermal Free Energies= -4111.226383

Electronic energy (RM06)

-4113.76218812

|    |             |             |             |
|----|-------------|-------------|-------------|
| C  | -4.08836500 | -0.85998400 | -0.06650600 |
| C  | -4.15947800 | -1.21377900 | -1.42520700 |
| C  | -3.27781700 | -0.59616100 | -2.33104400 |
| C  | -2.35139000 | 0.32895100  | -1.88128400 |
| C  | -2.21437000 | 0.68717400  | -0.51285400 |
| C  | -3.14544200 | 0.06101200  | 0.36054100  |
| H  | -4.76434600 | -1.31557600 | 0.64750500  |
| H  | -3.34550000 | -0.82963600 | -3.38894600 |
| H  | -1.73704500 | 0.84290700  | -2.61194900 |
| C  | -1.27256300 | 1.67471000  | -0.03656000 |
| H  | -1.60461700 | 2.21345300  | 0.83975500  |
| C  | 0.01008800  | 1.92241800  | -0.49423700 |
| C  | 0.73644200  | 1.09480600  | -1.45742800 |
| C  | 2.02558600  | 1.43681400  | -1.91496000 |
| H  | 0.15747900  | 0.36382200  | -2.00330000 |
| C  | 2.00156000  | 3.33388800  | -0.42723700 |
| C  | 2.65928000  | 2.61309700  | -1.36581100 |
| H  | 2.43118900  | 4.21730400  | 0.03007500  |
| H  | 3.64801000  | 2.91864800  | -1.68797300 |
| Pd | 2.22957400  | -0.26225200 | -0.45209300 |
| C  | 2.77669600  | -3.07535400 | 1.37774200  |
| H  | 2.66238700  | -3.63228800 | 2.31350000  |
| H  | 2.65199700  | -3.79173800 | 0.55605000  |
| C  | 4.17223100  | -2.43012900 | 1.30485700  |
| H  | 4.33498000  | -1.79111600 | 2.18197300  |
| H  | 4.95134700  | -3.19944400 | 1.31440300  |
| P  | 1.40851700  | -1.79521400 | 1.17791000  |
| P  | 4.34539600  | -1.31097300 | -0.20311200 |
| Br | -3.12383800 | 0.45370500  | 2.24194900  |
| C  | 0.09931600  | 3.88624800  | 1.00140000  |
| H  | -0.10024900 | 3.34574200  | 1.93442200  |
| H  | 0.76780500  | 4.72093600  | 1.21699800  |
| H  | -0.85008100 | 4.27877400  | 0.61960700  |
| N  | 0.72641000  | 3.01528900  | 0.01562700  |
| H  | 1.24401200  | -1.40668000 | 2.53408500  |
| H  | 0.29002000  | -2.66698300 | 1.13898000  |
| H  | 5.63810800  | -0.78601800 | 0.06967200  |
| H  | 4.78482000  | -2.26902000 | -1.15665300 |
| H  | 2.40582400  | 1.00624400  | -2.83641800 |
| C  | -5.11989000 | -2.17285300 | -1.87166300 |
| N  | -5.89958500 | -2.95639400 | -2.23908500 |

**A+''**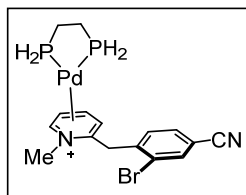

|                                            |                             |
|--------------------------------------------|-----------------------------|
| Zero-point correction=                     | 0.324573 (Hartree/Particle) |
| Thermal correction to Energy=              | 0.348898                    |
| Thermal correction to Enthalpy=            | 0.349842                    |
| Thermal correction to Gibbs Free Energy=   | 0.266162                    |
| Sum of electronic and zero-point Energies= | -4111.580751                |
| Sum of electronic and thermal Energies=    | -4111.556427                |

Sum of electronic and thermal Enthalpies= -4111.555482  
 Sum of electronic and thermal Free Energies= -4111.639162  
 Electronic energy (RM06) -4114.23802944

|    |             |             |             |
|----|-------------|-------------|-------------|
| C  | 5.36342100  | 0.13423000  | -0.10606400 |
| C  | 5.55205400  | -1.25135200 | -0.20746300 |
| C  | 4.45420000  | -2.08569600 | -0.46891900 |
| C  | 3.19062700  | -1.52728800 | -0.61983100 |
| C  | 2.97052700  | -0.14455900 | -0.51999900 |
| C  | 4.08691200  | 0.66962500  | -0.26224400 |
| H  | 6.20658000  | 0.78488100  | 0.09283200  |
| H  | 4.59804000  | -3.15733700 | -0.55385100 |
| H  | 2.34719300  | -2.18002600 | -0.82645100 |
| C  | 0.43995300  | -0.38460700 | -0.16578800 |
| C  | -0.41114800 | -1.11789000 | -0.94913400 |
| C  | -1.49332600 | -1.89440000 | -0.41192800 |
| H  | -0.24495800 | -1.11606600 | -2.02159100 |
| C  | -0.72760800 | -1.13662900 | 1.77652400  |
| C  | -1.59973500 | -1.92473300 | 1.02372100  |
| H  | -0.78687100 | -1.11803200 | 2.85886900  |
| H  | -2.20367500 | -2.66022000 | 1.54488600  |
| Pd | -3.14539800 | -0.57215400 | 0.11289700  |
| C  | -6.01001000 | 0.75245100  | -1.19283100 |
| H  | -6.50330700 | 1.33860400  | -1.97417600 |
| H  | -6.66569900 | -0.09510400 | -0.96006100 |
| C  | -5.78484200 | 1.61495000  | 0.06230200  |
| H  | -5.22217700 | 2.52054300  | -0.19445900 |
| H  | -6.74429200 | 1.93713500  | 0.47804000  |
| P  | -4.40566100 | 0.02234100  | -1.83380100 |
| P  | -4.77541800 | 0.70995000  | 1.36018000  |
| Br | 3.92132100  | 2.57072000  | -0.11594600 |
| C  | 1.09589700  | 0.44096800  | 2.09914700  |
| H  | 0.89765400  | 1.49910000  | 1.90831100  |
| H  | 0.85878300  | 0.21492400  | 3.13853600  |
| H  | 2.15081900  | 0.23114700  | 1.91938400  |
| N  | 0.25536300  | -0.40019600 | 1.22582600  |
| H  | -3.93907700 | 1.05429300  | -2.68308200 |
| H  | -4.88317300 | -0.84647900 | -2.84161300 |
| H  | -4.58138100 | 1.74057300  | 2.30972800  |
| H  | -5.78403200 | 0.00515700  | 2.05920500  |
| H  | -1.90831600 | -2.69797000 | -1.01179000 |
| C  | 1.57362000  | 0.42801700  | -0.74292800 |
| H  | 1.39530500  | 0.50886300  | -1.82189400 |
| H  | 1.53915600  | 1.45447800  | -0.36644200 |
| C  | 6.86317000  | -1.80770100 | -0.04050600 |
| N  | 7.92312300  | -2.26426700 | 0.09851400  |

**A'**

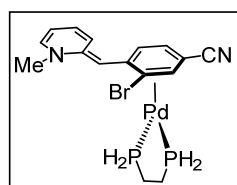

Zero-point correction= 0.309867 (Hartree/Particle)  
 Thermal correction to Energy= 0.334526  
 Thermal correction to Enthalpy= 0.335470  
 Thermal correction to Gibbs Free Energy= 0.251711



Sum of electronic and zero-point Energies= -4111.157485  
 Sum of electronic and thermal Energies= -4111.132825  
 Sum of electronic and thermal Enthalpies= -4111.131881  
 Sum of electronic and thermal Free Energies= -4111.215640  
 Electronic energy (RM06) -4113.75566737

|    |             |             |             |
|----|-------------|-------------|-------------|
| C  | 1.31338100  | -1.94682000 | -0.02316400 |
| C  | 1.34449200  | -2.39601900 | -1.38327400 |
| C  | 0.20570400  | -2.26370500 | -2.17396900 |
| C  | -0.96530500 | -1.70125700 | -1.65577300 |
| C  | -1.07289500 | -1.23278400 | -0.33299400 |
| C  | 0.11628200  | -1.36949100 | 0.47957100  |
| H  | 2.08242600  | -2.28639500 | 0.66039200  |
| H  | 0.21911700  | -2.63125100 | -3.19538900 |
| H  | -1.84849000 | -1.68296200 | -2.28441200 |
| C  | -2.29795300 | -0.71080400 | 0.23203800  |
| H  | -2.39518000 | -0.85915600 | 1.29811800  |
| C  | -3.29272600 | -0.00528300 | -0.41745300 |
| C  | -3.20154000 | 0.54659800  | -1.75172000 |
| C  | -4.21007100 | 1.26345600  | -2.32016100 |
| H  | -2.26529400 | 0.41221000  | -2.27733600 |
| C  | -5.51071200 | 1.00944200  | -0.33479100 |
| C  | -5.42363600 | 1.49632900  | -1.60163400 |
| H  | -6.38689000 | 1.16216000  | 0.28539500  |
| H  | -6.24789000 | 2.05414000  | -2.02881900 |
| Pd | 1.55811900  | 0.32729200  | 0.13050800  |
| C  | 2.32911400  | 3.62543200  | 0.33661000  |
| H  | 2.10652000  | 4.66743700  | 0.08383400  |
| H  | 2.69389200  | 3.61342500  | 1.37160200  |
| C  | 3.40967800  | 3.06566400  | -0.60563000 |
| H  | 3.08343600  | 3.16258400  | -1.64881700 |
| H  | 4.33863000  | 3.63620200  | -0.50158700 |
| P  | 0.76161500  | 2.57538000  | 0.31706400  |
| P  | 3.70911700  | 1.22729100  | -0.31389600 |
| Br | -0.05120700 | -1.35904800 | 2.43155400  |
| C  | -4.69131500 | -0.20112600 | 1.61630500  |
| H  | -3.97596800 | 0.26548000  | 2.30368300  |
| H  | -5.70437000 | 0.03359800  | 1.94615900  |
| H  | -4.54227800 | -1.28604100 | 1.64862900  |
| N  | -4.50324000 | 0.28902500  | 0.25627800  |
| H  | 0.08944700  | 3.19430800  | -0.77307000 |
| H  | 0.04063200  | 3.26916100  | 1.32803900  |
| H  | 4.63317200  | 0.99115100  | -1.36597600 |
| H  | 4.68533800  | 1.31163800  | 0.71545900  |
| H  | -4.08220500 | 1.68002200  | -3.31536600 |
| C  | 2.53116900  | -2.99739000 | -1.89766100 |
| N  | 3.50778000  | -3.47902200 | -2.31393800 |

**A+**

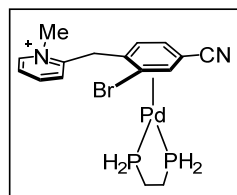

Zero-point correction= 0.323740 (Hartree/Particle)  
 Thermal correction to Energy= 0.348357  
 Thermal correction to Enthalpy= 0.349301

Thermal correction to Gibbs Free Energy= 0.265828  
 Sum of electronic and zero-point Energies= -4111.558928  
 Sum of electronic and thermal Energies= -4111.534311  
 Sum of electronic and thermal Enthalpies= -4111.533367  
 Sum of electronic and thermal Free Energies= -4111.616840  
 Electronic energy (RM06) -4114.22925518

|    |             |             |             |
|----|-------------|-------------|-------------|
| C  | 1.25778200  | -1.83572500 | 0.31595800  |
| C  | 1.81476500  | -2.46591600 | -0.85186400 |
| C  | 1.03625800  | -2.70502600 | -1.97120300 |
| C  | -0.33542100 | -2.37379200 | -1.95647700 |
| C  | -0.93613100 | -1.79046900 | -0.85293100 |
| C  | -0.12348500 | -1.45460000 | 0.28121000  |
| H  | 1.76625100  | -1.96890200 | 1.26497900  |
| H  | 1.47142500  | -3.18067000 | -2.84323100 |
| H  | -0.94053200 | -2.61312500 | -2.82693100 |
| C  | -2.91419900 | -0.16869400 | -0.85317500 |
| C  | -2.32203600 | 0.76426800  | -1.70788100 |
| C  | -2.82438600 | 2.05516700  | -1.81773200 |
| H  | -1.46387600 | 0.44283500  | -2.28649200 |
| C  | -4.47568500 | 1.49578200  | -0.18636000 |
| C  | -3.92128100 | 2.42927400  | -1.03552600 |
| H  | -5.32358900 | 1.71950600  | 0.44828200  |
| H  | -4.34550400 | 3.42573400  | -1.08031200 |
| Pd | 1.24058100  | 0.34748900  | 0.11858100  |
| C  | 2.05174000  | 3.63237800  | 0.49108700  |
| H  | 1.93506200  | 4.68029000  | 0.19802600  |
| H  | 2.08593500  | 3.60267200  | 1.58703700  |
| C  | 3.34811200  | 3.04790600  | -0.09743800 |
| H  | 3.35321000  | 3.16092600  | -1.18838500 |
| H  | 4.21639500  | 3.59119400  | 0.28770000  |
| P  | 0.54307300  | 2.63194800  | -0.01676300 |
| P  | 3.49755900  | 1.20856200  | 0.25329900  |
| Br | -1.01000500 | -1.23802900 | 2.01686300  |
| C  | -4.65556600 | -0.71477300 | 0.82802500  |
| H  | -3.92856900 | -1.06130300 | 1.56515900  |
| H  | -5.46286600 | -0.18573900 | 1.33195000  |
| H  | -5.07011800 | -1.55817600 | 0.27334100  |
| N  | -3.98733600 | 0.22651900  | -0.10680400 |
| H  | 0.24671900  | 3.25389000  | -1.26114300 |
| H  | -0.45305600 | 3.31681600  | 0.72842400  |
| H  | 4.61299700  | 0.88160900  | -0.55237200 |
| H  | 4.17750300  | 1.22708800  | 1.49550100  |
| H  | -2.36871400 | 2.76333900  | -2.50257900 |
| C  | -2.43996000 | -1.60791200 | -0.82786800 |
| H  | -2.84458600 | -2.13302200 | 0.03839200  |
| H  | -2.86654700 | -2.09606100 | -1.71503400 |
| C  | 3.19372700  | -2.84862800 | -0.81999900 |
| N  | 4.32319800  | -3.12444300 | -0.77637400 |

## ATS

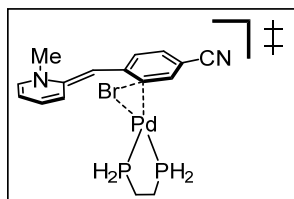

Zero-point correction= 0.309097 (Hartree/Particle)  
 Thermal correction to Energy= 0.333405

Thermal correction to Enthalpy= 0.334349  
 Thermal correction to Gibbs Free Energy= 0.251078  
 Sum of electronic and zero-point Energies= -4111.144457  
 Sum of electronic and thermal Energies= -4111.120150  
 Sum of electronic and thermal Enthalpies= -4111.119206  
 Sum of electronic and thermal Free Energies= -4111.202476  
 Electronic energy (RM06) -4113.73926422

|    |             |             |             |
|----|-------------|-------------|-------------|
| C  | -1.39977300 | 2.18105900  | -0.01932600 |
| C  | -1.09232500 | 3.16149400  | -0.98589700 |
| C  | 0.23456600  | 3.29501700  | -1.42268200 |
| C  | 1.22469800  | 2.45569600  | -0.92163200 |
| C  | 0.96144100  | 1.41410300  | -0.00322100 |
| C  | -0.40831300 | 1.28890000  | 0.40038000  |
| H  | -2.39785500 | 2.12745900  | 0.40049200  |
| H  | 0.49301700  | 4.08400500  | -2.12159500 |
| H  | 2.25169500  | 2.63655300  | -1.22070800 |
| C  | 1.96720500  | 0.53660200  | 0.55022800  |
| H  | 1.70436900  | 0.14031500  | 1.52158000  |
| C  | 3.15567100  | 0.12585900  | -0.02274900 |
| C  | 3.53662300  | 0.31088900  | -1.40622900 |
| C  | 4.71144000  | -0.15466800 | -1.91404400 |
| H  | 2.82043900  | 0.79787000  | -2.05464200 |
| C  | 5.27423400  | -1.06067400 | 0.22147700  |
| C  | 5.63245900  | -0.85440900 | -1.07462200 |
| H  | 5.90652400  | -1.60087900 | 0.91718900  |
| H  | 6.57896400  | -1.22883400 | -1.44463800 |
| Pd | -1.49481200 | -0.54904800 | 0.17238500  |
| C  | -1.40355800 | -3.48368600 | -1.58730500 |
| H  | -1.18579300 | -4.03512900 | -2.50789900 |
| H  | -1.09050100 | -4.11730100 | -0.74785600 |
| C  | -2.91083200 | -3.18852000 | -1.48896700 |
| H  | -3.23975500 | -2.62512900 | -2.37108400 |
| H  | -3.48219200 | -4.12243400 | -1.46889900 |
| P  | -0.36355200 | -1.91501900 | -1.48390200 |
| P  | -3.31513700 | -2.11436100 | 0.00164400  |
| Br | -0.79761500 | 0.60838500  | 2.46582500  |
| C  | 3.80140500  | -0.86254500 | 2.15443700  |
| H  | 2.92438000  | -1.51182600 | 2.25918400  |
| H  | 4.66150500  | -1.34939800 | 2.61633600  |
| H  | 3.59482200  | 0.07923700  | 2.67437600  |
| N  | 4.09357500  | -0.60389400 | 0.74930900  |
| H  | -0.38185300 | -1.54030700 | -2.85575600 |
| H  | 0.92076900  | -2.52362200 | -1.53463000 |
| H  | -4.68801600 | -1.87259500 | -0.26521100 |
| H  | -3.53089200 | -3.12038500 | 0.98080200  |
| H  | 4.93896400  | -0.01260700 | -2.96682400 |
| C  | -2.11355100 | 4.03650700  | -1.47080200 |
| N  | -2.94624800 | 4.74514000  | -1.87276800 |

### A+TS

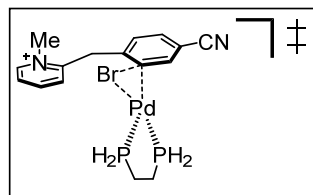

Zero-point correction= 0.322990 (Hartree/Particle)  
 Thermal correction to Energy= 0.347248

Thermal correction to Enthalpy= 0.348192  
 Thermal correction to Gibbs Free Energy= 0.265817  
 Sum of electronic and zero-point Energies= -4111.550033  
 Sum of electronic and thermal Energies= -4111.525775  
 Sum of electronic and thermal Enthalpies= -4111.524831  
 Sum of electronic and thermal Free Energies= -4111.607206  
 Electronic energy (RM06) -4114.21399383

|    |             |             |             |
|----|-------------|-------------|-------------|
| C  | 0.42941600  | 2.08547000  | -0.59083100 |
| C  | 0.44526400  | 3.24916700  | 0.20492900  |
| C  | -0.24873300 | 3.28494800  | 1.42024600  |
| C  | -0.97180600 | 2.15821200  | 1.83086700  |
| C  | -1.00134200 | 0.98719800  | 1.07571900  |
| C  | -0.21468400 | 0.93324400  | -0.10407700 |
| H  | 0.89252000  | 2.08997200  | -1.57075900 |
| H  | -0.24331200 | 4.18615500  | 2.02272200  |
| H  | -1.51123100 | 2.19339600  | 2.77501000  |
| C  | -3.10818300 | -0.39151900 | 0.80119700  |
| C  | -3.92003300 | 0.71013100  | 0.52200300  |
| C  | -5.15348300 | 0.55655600  | -0.09760000 |
| H  | -3.54929700 | 1.69260900  | 0.78921800  |
| C  | -4.77126400 | -1.79810200 | -0.15239400 |
| C  | -5.58693900 | -0.72641700 | -0.44496700 |
| H  | -5.04364800 | -2.81710000 | -0.39618500 |
| H  | -6.53868800 | -0.89897400 | -0.93389500 |
| Pd | 1.50018100  | -0.35029000 | -0.31144300 |
| C  | 3.85497500  | -2.09716800 | 1.46113500  |
| H  | 4.47988100  | -2.19692500 | 2.35397700  |
| H  | 3.50824400  | -3.10283100 | 1.19323600  |
| C  | 4.67077000  | -1.49022600 | 0.30645900  |
| H  | 5.09109600  | -0.52348100 | 0.60873400  |
| H  | 5.51114000  | -2.14392100 | 0.05316700  |
| P  | 2.31540300  | -1.09086600 | 1.85585700  |
| P  | 3.60585700  | -1.15588400 | -1.20142100 |
| Br | -0.86339600 | -0.38294300 | -1.65557200 |
| C  | -2.73554900 | -2.83805900 | 0.69257600  |
| H  | -2.49310300 | -2.92823300 | 1.75219600  |
| H  | -3.30075400 | -3.71456200 | 0.37947000  |
| H  | -1.82508900 | -2.75484300 | 0.09433100  |
| N  | -3.56824600 | -1.63247600 | 0.46241300  |
| H  | 2.87173200  | -0.10225800 | 2.70707600  |
| H  | 1.79310300  | -1.89862700 | 2.90364300  |
| H  | 4.52657200  | -0.44870000 | -2.00987000 |
| H  | 3.69617500  | -2.39622100 | -1.88017000 |
| H  | -5.77029800 | 1.42399500  | -0.31034800 |
| C  | -1.78326600 | -0.22568300 | 1.52764400  |
| H  | -2.00884300 | -0.14001700 | 2.60014300  |
| H  | -1.15554300 | -1.11074600 | 1.40584200  |
| C  | 1.15145900  | 4.40775600  | -0.26019500 |
| N  | 1.72844400  | 5.34331000  | -0.63940200 |

## B

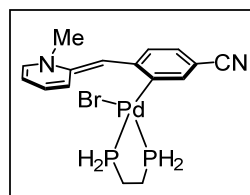

Zero-point correction= 0.311420 (Hartree/Particle)

Thermal correction to Energy= 0.335778  
 Thermal correction to Enthalpy= 0.336722  
 Thermal correction to Gibbs Free Energy= 0.253959  
 Sum of electronic and zero-point Energies= -4111.185446  
 Sum of electronic and thermal Energies= -4111.161088  
 Sum of electronic and thermal Enthalpies= -4111.160144  
 Sum of electronic and thermal Free Energies= -4111.242908  
 Electronic energy (RM06) -4113.78805917

|    |             |             |             |
|----|-------------|-------------|-------------|
| C  | -0.92914200 | 2.55334300  | -0.07081100 |
| C  | -0.21651200 | 3.77210500  | -0.09825500 |
| C  | 1.18112700  | 3.74727600  | 0.03517800  |
| C  | 1.84005700  | 2.53540400  | 0.18800500  |
| C  | 1.15126500  | 1.29800400  | 0.19456100  |
| C  | -0.26302500 | 1.34318700  | 0.07414500  |
| H  | -2.01104600 | 2.58232400  | -0.16235700 |
| H  | 1.73810400  | 4.67922100  | 0.03947900  |
| H  | 2.91324100  | 2.54166900  | 0.35285200  |
| C  | 1.81882100  | 0.01848900  | 0.41322200  |
| H  | 1.23151700  | -0.67461200 | 1.00203700  |
| C  | 3.07487400  | -0.35988000 | -0.00703900 |
| C  | 3.89399000  | 0.36175800  | -0.96048200 |
| C  | 5.11180200  | -0.08603300 | -1.36900600 |
| H  | 3.47707800  | 1.26994400  | -1.37727400 |
| C  | 4.87535700  | -2.00841800 | 0.03014000  |
| C  | 5.63987200  | -1.31295500 | -0.85356100 |
| H  | 5.19819300  | -2.95143800 | 0.45752600  |
| H  | 6.60913500  | -1.69259900 | -1.15275900 |
| Pd | -1.37205100 | -0.38562600 | 0.03918400  |
| C  | -2.05048100 | -1.85969900 | -2.95928700 |
| H  | -2.36926900 | -1.71972700 | -3.99754600 |
| H  | -1.22342200 | -2.58006800 | -2.96633300 |
| C  | -3.21030900 | -2.38852000 | -2.09281800 |
| H  | -4.08252800 | -1.73086700 | -2.19033700 |
| H  | -3.51641400 | -3.38495700 | -2.42662600 |
| P  | -1.35592900 | -0.26843800 | -2.25132600 |
| P  | -2.73538600 | -2.37443600 | -0.27484400 |
| Br | -1.35445000 | -0.53205700 | 2.53992900  |
| C  | 2.90394000  | -2.37295800 | 1.42219600  |
| H  | 1.97419800  | -2.75773600 | 0.98535600  |
| H  | 3.52135400  | -3.21366600 | 1.74278400  |
| H  | 2.63915400  | -1.76336200 | 2.29286000  |
| N  | 3.64478000  | -1.57445200 | 0.45430200  |
| H  | -2.14117500 | 0.72751200  | -2.87564600 |
| H  | -0.16152100 | -0.09226700 | -2.98037500 |
| H  | -3.97473400 | -2.62013900 | 0.35586100  |
| H  | -2.16955300 | -3.66130900 | -0.10812200 |
| H  | 5.67875600  | 0.48053900  | -2.10262000 |
| C  | -0.91361200 | 5.00901900  | -0.26813700 |
| N  | -1.48612200 | 6.01226600  | -0.42065900 |

**B+**

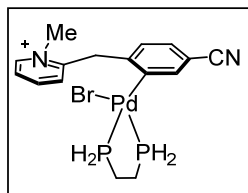

Zero-point correction= 0.325574 (Hartree/Particle)

Thermal correction to Energy= 0.349745  
 Thermal correction to Enthalpy= 0.350689  
 Thermal correction to Gibbs Free Energy= 0.269144  
 Sum of electronic and zero-point Energies= -4111.595388  
 Sum of electronic and thermal Energies= -4111.571217  
 Sum of electronic and thermal Enthalpies= -4111.570273  
 Sum of electronic and thermal Free Energies= -4111.651818  
 Electronic energy (RM06) -4114.26497370

|    |             |             |             |
|----|-------------|-------------|-------------|
| C  | 2.72825400  | -0.24541900 | -0.02018500 |
| C  | 3.74125200  | -1.22262400 | -0.07074800 |
| C  | 3.40792700  | -2.57640200 | 0.05389900  |
| C  | 2.07507000  | -2.92230600 | 0.25144900  |
| C  | 1.06098800  | -1.95304600 | 0.31537100  |
| C  | 1.38304000  | -0.58612800 | 0.15850600  |
| H  | 3.02998400  | 0.79391700  | -0.10418300 |
| H  | 4.18014500  | -3.33682800 | 0.01076200  |
| H  | 1.81860200  | -3.97102100 | 0.38371400  |
| C  | -1.37255200 | -2.31307600 | -0.41598500 |
| C  | -1.04141100 | -2.37683300 | -1.77251200 |
| C  | -2.02445500 | -2.36187300 | -2.75372600 |
| H  | 0.00941700  | -2.44872000 | -2.02762000 |
| C  | -3.66868600 | -2.20436100 | -1.02995800 |
| C  | -3.36723100 | -2.26643900 | -2.37412400 |
| H  | -4.68614200 | -2.13770800 | -0.66568200 |
| H  | -4.17046600 | -2.25055300 | -3.10172700 |
| Pd | 0.06404700  | 1.01654300  | 0.22638000  |
| C  | -0.38202100 | 3.12411800  | -2.44268500 |
| H  | 0.10628500  | 3.65688300  | -3.26497400 |
| H  | -1.32618600 | 2.72265000  | -2.83002300 |
| C  | -0.64641000 | 4.06435600  | -1.25177700 |
| H  | 0.27742600  | 4.57621000  | -0.95800200 |
| H  | -1.37260600 | 4.83621600  | -1.52390100 |
| P  | 0.64865100  | 1.65392000  | -1.91727200 |
| P  | -1.20867700 | 3.07676500  | 0.23643300  |
| Br | -0.70578200 | 0.52895300  | 2.57195600  |
| C  | -3.10643900 | -2.17339700 | 1.34819500  |
| H  | -2.68782700 | -1.27318900 | 1.80961200  |
| H  | -4.19426600 | -2.14791800 | 1.39220500  |
| H  | -2.74404100 | -3.06155100 | 1.86876800  |
| N  | -2.69607700 | -2.23304600 | -0.07955600 |
| H  | 1.97967700  | 2.08842400  | -2.09416100 |
| H  | 0.55149200  | 0.77611100  | -3.01729700 |
| H  | -1.10074100 | 3.98615800  | 1.30610800  |
| H  | -2.61511000 | 3.05066300  | 0.09997000  |
| H  | -1.75291900 | -2.43073000 | -3.80272900 |
| C  | -0.33963700 | -2.40884800 | 0.67789200  |
| H  | -0.65981000 | -1.82286600 | 1.54354600  |
| H  | -0.31114300 | -3.46076400 | 1.00113800  |
| C  | 5.10274400  | -0.81765500 | -0.26868400 |
| N  | 6.19925300  | -0.47272800 | -0.44537000 |

## B TS

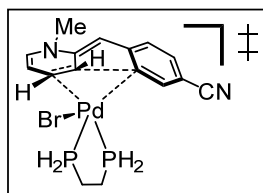

Zero-point correction= 0.309000 (Hartree/Particle)  
 Thermal correction to Energy= 0.333246  
 Thermal correction to Enthalpy= 0.334190  
 Thermal correction to Gibbs Free Energy= 0.251454  
 Sum of electronic and zero-point Energies= -4111.139959  
 Sum of electronic and thermal Energies= -4111.115713  
 Sum of electronic and thermal Enthalpies= -4111.114769  
 Sum of electronic and thermal Free Energies= -4111.197506  
 Electronic energy (RM06) -4113.73843856

|    |             |             |             |
|----|-------------|-------------|-------------|
| C  | 1.56995100  | 1.96565300  | -0.97763900 |
| C  | 2.37454700  | 3.06918500  | -0.62726100 |
| C  | 3.46374900  | 2.89964800  | 0.24811500  |
| C  | 3.78154900  | 1.63427200  | 0.72357900  |
| C  | 2.98967600  | 0.52356900  | 0.38155500  |
| C  | 1.82096900  | 0.73058200  | -0.39176200 |
| H  | 0.72015400  | 2.12003200  | -1.63413600 |
| H  | 4.07282400  | 3.75737700  | 0.51400900  |
| H  | 4.67184200  | 1.49126700  | 1.33033700  |
| C  | 3.33025400  | -0.85808400 | 0.65488400  |
| H  | 4.03488200  | -1.13456900 | 1.43007600  |
| C  | 2.66644000  | -1.74117700 | -0.13991900 |
| C  | 1.83583500  | -1.14985500 | -1.22536700 |
| C  | 0.64286300  | -1.84658600 | -1.61875100 |
| H  | 2.38445600  | -0.62699800 | -2.00438700 |
| C  | 1.50376200  | -3.81403100 | -0.45156500 |
| C  | 0.51829000  | -3.23572200 | -1.17426900 |
| H  | 1.48041600  | -4.86336700 | -0.17897400 |
| H  | -0.32387300 | -3.83505400 | -1.50097000 |
| C  | 3.52192600  | -3.74983100 | 0.96007400  |
| H  | 4.55640200  | -3.45734000 | 0.75504800  |
| H  | 3.44441400  | -4.83568800 | 0.87637100  |
| H  | 3.26946400  | -3.45012700 | 1.98744000  |
| N  | 2.63206600  | -3.12798400 | -0.00881900 |
| Br | -0.82698900 | 1.18057200  | 1.70900900  |
| C  | -5.06247600 | -0.60088800 | -0.02239800 |
| C  | -3.67392400 | -0.02381600 | -0.32270500 |
| H  | -5.24781400 | -1.50481700 | -0.61226600 |
| H  | -5.12633000 | -0.88038500 | 1.03596900  |
| H  | -3.45111100 | 0.85244100  | 0.29510200  |
| H  | -3.59168500 | 0.29336100  | -1.37000100 |
| P  | -6.41479600 | 0.68663400  | -0.32325900 |
| H  | -7.51683400 | -0.21484900 | -0.24607700 |
| H  | -6.37288000 | 0.64152000  | -1.74853900 |
| P  | -2.27124300 | -1.20025700 | -0.02200900 |
| H  | -2.68045500 | -2.31862100 | -0.79720000 |
| H  | -2.57593900 | -1.71948600 | 1.25309900  |
| Pd | -0.09007900 | -0.37698500 | -0.20263100 |
| H  | 0.21750200  | -1.60090000 | -2.59047800 |
| C  | 2.07234800  | 4.36490000  | -1.15627500 |
| N  | 1.83634800  | 5.41440100  | -1.60138700 |

### B+TS

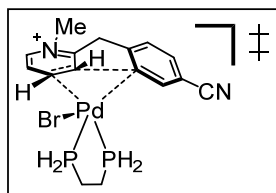

Zero-point correction= 0.323186 (Hartree/Particle)  
 Thermal correction to Energy= 0.346660  
 Thermal correction to Enthalpy= 0.347604  
 Thermal correction to Gibbs Free Energy= 0.269427  
 Sum of electronic and zero-point Energies= -4111.506097  
 Sum of electronic and thermal Energies= -4111.482623  
 Sum of electronic and thermal Enthalpies= -4111.481679  
 Sum of electronic and thermal Free Energies= -4111.559857  
 Electronic energy (RM06) -4114.18867959

|    |             |             |             |
|----|-------------|-------------|-------------|
| C  | -2.32558400 | 0.42711000  | -0.52979500 |
| C  | -3.58065200 | 0.82009800  | -0.03177500 |
| C  | -3.70085900 | 1.96326100  | 0.77942500  |
| C  | -2.57660500 | 2.73595000  | 1.05964600  |
| C  | -1.32357500 | 2.35446700  | 0.57390000  |
| C  | -1.19590900 | 1.16633400  | -0.16823300 |
| H  | -2.23456000 | -0.47066300 | -1.13403900 |
| H  | -4.67640700 | 2.25585000  | 1.15297200  |
| H  | -2.68429300 | 3.65641500  | 1.62749900  |
| C  | 0.89894800  | 2.63089600  | -0.28042400 |
| C  | 0.33758600  | 1.72235700  | -1.28610700 |
| C  | 1.27243400  | 0.73990500  | -1.80825300 |
| H  | -0.40968200 | 2.12400300  | -1.96902300 |
| C  | 3.11732400  | 2.10172200  | -0.95757600 |
| C  | 2.67537400  | 1.04273300  | -1.68698000 |
| H  | 4.15469700  | 2.39534500  | -0.87912600 |
| H  | 3.39372300  | 0.44383700  | -2.23759700 |
| C  | 2.76061100  | 3.80686900  | 0.77879800  |
| H  | 2.80427000  | 3.34062700  | 1.76822500  |
| H  | 3.76722300  | 4.08548800  | 0.46762000  |
| H  | 2.14282500  | 4.70407100  | 0.81702100  |
| N  | 2.21311700  | 2.85276800  | -0.20641600 |
| Br | -0.38124700 | -2.41833400 | -1.39913900 |
| C  | 2.00453200  | -2.82730800 | 1.84251400  |
| C  | 0.49304800  | -2.97064000 | 2.07637100  |
| H  | 2.46666900  | -3.80468300 | 1.67268600  |
| H  | 2.49235300  | -2.38280000 | 2.71771900  |
| H  | 0.03365000  | -3.54763900 | 1.26847400  |
| H  | 0.29206800  | -3.47006100 | 3.02923000  |
| P  | 2.38560300  | -1.69697400 | 0.40195600  |
| H  | 3.67281200  | -1.21148900 | 0.73752000  |
| H  | 2.70707200  | -2.53109400 | -0.68097000 |
| P  | -0.32438300 | -1.30044500 | 2.01498400  |
| H  | -1.70252500 | -1.58600700 | 2.00797800  |
| H  | -0.19082700 | -0.81207200 | 3.33838100  |
| Pd | 0.56084700  | -0.24310100 | 0.02484600  |
| H  | 0.94880800  | 0.09281100  | -2.61694200 |
| C  | -0.10330700 | 3.25426700  | 0.65169400  |
| H  | -0.36316000 | 4.27669100  | 0.33261400  |
| H  | 0.29525900  | 3.34346600  | 1.66999400  |
| C  | -4.74409200 | 0.04015400  | -0.34321200 |
| N  | -5.69015200 | -0.59069900 | -0.58463400 |

### C-anti

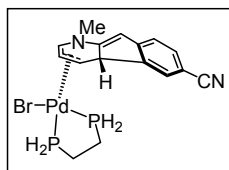



Zero-point correction= 0.312063 (Hartree/Particle)  
 Thermal correction to Energy= 0.335813  
 Thermal correction to Enthalpy= 0.336757  
 Thermal correction to Gibbs Free Energy= 0.256231  
 Sum of electronic and zero-point Energies= -4111.202793  
 Sum of electronic and thermal Energies= -4111.179043  
 Sum of electronic and thermal Enthalpies= -4111.178099  
 Sum of electronic and thermal Free Energies= -4111.258625  
 Electronic energy (RM06) -4113.80975582

|    |             |             |             |
|----|-------------|-------------|-------------|
| C  | -2.38667100 | -1.37369700 | -1.07645900 |
| C  | -3.37097000 | -2.20103000 | -0.48713700 |
| C  | -4.27954100 | -1.66556100 | 0.44714400  |
| C  | -4.21653100 | -0.32474200 | 0.81809300  |
| C  | -3.23070100 | 0.49543200  | 0.25090300  |
| C  | -2.32702000 | -0.04476500 | -0.70458300 |
| H  | -1.69306700 | -1.79074500 | -1.80048500 |
| H  | -5.03315600 | -2.31596300 | 0.88045500  |
| H  | -4.92358000 | 0.07307800  | 1.54124100  |
| C  | -2.89366300 | 1.88648500  | 0.49973800  |
| H  | -3.39803200 | 2.52467300  | 1.21545100  |
| C  | -1.82139400 | 2.21653400  | -0.28552700 |
| C  | -1.44268300 | 1.07194300  | -1.20865400 |
| C  | 0.06335700  | 0.91816900  | -1.40365200 |
| H  | -1.83794300 | 1.36170000  | -2.20349800 |
| C  | 0.12752000  | 3.36890000  | -1.03578600 |
| C  | 0.69769900  | 2.23759900  | -1.51793000 |
| H  | 0.59979800  | 4.34142500  | -1.11788400 |
| H  | 1.66691900  | 2.30565500  | -2.00017800 |
| C  | -1.53594100 | 4.54608600  | 0.38439400  |
| H  | -1.37374300 | 4.40518400  | 1.46265500  |
| H  | -0.96856200 | 5.41978700  | 0.05674000  |
| H  | -2.60154500 | 4.73432200  | 0.21614000  |
| N  | -1.11288200 | 3.38278800  | -0.37828600 |
| Br | 2.80812300  | -0.77527300 | -1.88797200 |
| C  | 0.74078300  | -0.73484700 | 3.33911200  |
| C  | 2.27696500  | -0.82191800 | 3.30271500  |
| H  | 0.39028400  | -0.37724800 | 4.31323700  |
| H  | 0.30169800  | -1.72728700 | 3.17944700  |
| H  | 2.71604300  | 0.14090900  | 3.59167700  |
| H  | 2.63957800  | -1.57236200 | 4.01233700  |
| P  | 0.07146800  | 0.35521700  | 1.96533400  |
| H  | -1.31686400 | 0.19166000  | 2.14144500  |
| H  | 0.20690000  | 1.64079400  | 2.54411300  |
| P  | 2.84621500  | -1.16904200 | 1.55017700  |
| H  | 4.23454000  | -0.92095700 | 1.62647300  |
| H  | 2.89209800  | -2.58151700 | 1.51971500  |
| Pd | 1.30020700  | -0.07309400 | 0.04112400  |
| H  | 0.29318800  | 0.26449200  | -2.24380900 |
| C  | -3.44695800 | -3.58697300 | -0.83426800 |
| N  | -3.51271100 | -4.71693800 | -1.10875200 |

### C': allyl cation

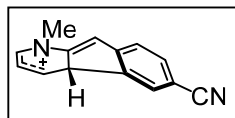

Zero-point correction= 0.215630 (Hartree/Particle)  
 Thermal correction to Energy= 0.228176  
 Thermal correction to Enthalpy= 0.229121

Thermal correction to Gibbs Free Energy= 0.176687  
 Sum of electronic and zero-point Energies= -649.120841  
 Sum of electronic and thermal Energies= -649.108295  
 Sum of electronic and thermal Enthalpies= -649.107351  
 Sum of electronic and thermal Free Energies= -649.159784  
 Electronic energy (RM06) -649.09455379

|   |             |             |             |
|---|-------------|-------------|-------------|
| C | 1.84642800  | -0.81023100 | 0.23363800  |
| C | 2.98797300  | -0.01357300 | 0.00526500  |
| C | 2.87079300  | 1.37206100  | -0.22859400 |
| C | 1.62195600  | 1.98354900  | -0.24957900 |
| C | 0.48486200  | 1.19257700  | -0.04520100 |
| C | 0.60776100  | -0.19969600 | 0.19100900  |
| H | 1.96418200  | -1.87228800 | 0.42488500  |
| H | 3.76953500  | 1.95718400  | -0.39066300 |
| H | 1.53773500  | 3.05246500  | -0.41910800 |
| C | -0.92090300 | 1.55684600  | -0.05583100 |
| H | -1.29475400 | 2.55646900  | -0.24428800 |
| C | -1.65400200 | 0.43669200  | 0.17427500  |
| C | -0.77419300 | -0.76121100 | 0.46052800  |
| C | -1.32224900 | -1.99733100 | -0.18779600 |
| H | -0.79541900 | -0.97195500 | 1.55065000  |
| C | -3.51118900 | -0.95608500 | -0.16098800 |
| C | -2.65867900 | -2.08343900 | -0.39853500 |
| H | -4.58960900 | -1.05069900 | -0.22951800 |
| H | -3.12521200 | -2.99491200 | -0.75564900 |
| C | -3.92808300 | 1.43337300  | 0.13823600  |
| H | -3.74141300 | 2.06429800  | -0.73448000 |
| H | -4.96540300 | 1.09966600  | 0.13024900  |
| H | -3.72269200 | 1.99280300  | 1.05264300  |
| N | -3.03815800 | 0.25518400  | 0.08343600  |
| H | -0.66826600 | -2.84090500 | -0.39173400 |
| C | 4.28219800  | -0.62717700 | 0.01008800  |
| N | 5.32891200  | -1.13379300 | 0.01483800  |

### C-syn

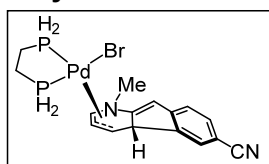

Zero-point correction= 0.312079 (Hartree/Particle)  
 Thermal correction to Energy= 0.335838  
 Thermal correction to Enthalpy= 0.336782  
 Thermal correction to Gibbs Free Energy= 0.256699  
 Sum of electronic and zero-point Energies= -4111.191857  
 Sum of electronic and thermal Energies= -4111.168098  
 Sum of electronic and thermal Enthalpies= -4111.167153  
 Sum of electronic and thermal Free Energies= -4111.247236  
 Electronic energy (RM06) -4113.79712573

|   |            |             |             |
|---|------------|-------------|-------------|
| C | 3.58180500 | -1.14294900 | -0.26749200 |
| C | 4.95651400 | -1.15082400 | 0.05757800  |
| C | 5.58610400 | 0.02189800  | 0.51754400  |
| C | 4.86968200 | 1.20915000  | 0.64764700  |
| C | 3.51369100 | 1.22760100  | 0.30193500  |
| C | 2.87950200 | 0.04055300  | -0.15038600 |
| H | 3.10536600 | -2.05919800 | -0.60396000 |
| H | 6.64123700 | -0.01016100 | 0.76976100  |

|    |             |             |             |
|----|-------------|-------------|-------------|
| H  | 5.36515900  | 2.10731800  | 1.00547700  |
| C  | 2.55488500  | 2.32304700  | 0.27581800  |
| H  | 2.78970700  | 3.35145800  | 0.52349400  |
| C  | 1.36923500  | 1.84153100  | -0.17613800 |
| C  | 1.40928200  | 0.33690500  | -0.32867300 |
| C  | 0.62148100  | -0.13888300 | -1.54197400 |
| H  | 0.90539500  | -0.03666700 | 0.58604800  |
| C  | -0.54887000 | 1.97725000  | -1.54830600 |
| C  | -0.14025800 | 0.81711100  | -2.25520000 |
| H  | -1.32720800 | 2.62242700  | -1.93963100 |
| H  | -0.53368200 | 0.62721200  | -3.24762500 |
| C  | -0.29222400 | 3.63298600  | 0.25997300  |
| H  | 0.52939100  | 4.30921800  | 0.50832200  |
| H  | -1.03766700 | 4.18726800  | -0.31645000 |
| H  | -0.74542200 | 3.23879500  | 1.17634300  |
| N  | 0.21014000  | 2.52132000  | -0.54713200 |
| C  | -4.55549600 | -1.41075000 | 0.15059300  |
| C  | -3.52361700 | -2.26388900 | 0.90544100  |
| H  | -5.43806600 | -1.23463300 | 0.77397800  |
| H  | -4.89420400 | -1.93076500 | -0.75427200 |
| H  | -3.24820100 | -1.77923600 | 1.84703000  |
| H  | -3.92627800 | -3.25979800 | 1.11823900  |
| P  | -3.82797600 | 0.22143100  | -0.42974700 |
| H  | -4.84095200 | 0.60868200  | -1.34918000 |
| H  | -4.16782200 | 1.10660900  | 0.61308900  |
| P  | -1.92415400 | -2.38021100 | -0.05412600 |
| H  | -1.06753300 | -3.00200400 | 0.87797300  |
| H  | -2.17137300 | -3.51384200 | -0.87727900 |
| Pd | -1.50522000 | -0.16793500 | -0.85745000 |
| Br | -1.28717900 | 0.33718800  | 2.07577500  |
| H  | 0.94276700  | -1.04606200 | -2.04429400 |
| C  | 5.71180600  | -2.35895400 | -0.08124500 |
| N  | 6.32294300  | -3.34305800 | -0.19874100 |

### C-TS

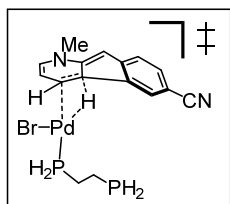

|                                              |                             |
|----------------------------------------------|-----------------------------|
| Zero-point correction=                       | 0.305462 (Hartree/Particle) |
| Thermal correction to Energy=                | 0.330032                    |
| Thermal correction to Enthalpy=              | 0.330976                    |
| Thermal correction to Gibbs Free Energy=     | 0.246675                    |
| Sum of electronic and zero-point Energies=   | -4111.182954                |
| Sum of electronic and thermal Energies=      | -4111.158384                |
| Sum of electronic and thermal Enthalpies=    | -4111.157440                |
| Sum of electronic and thermal Free Energies= | -4111.241741                |
| Electronic energy (RM06)                     | -4113.77370477              |

|   |            |            |             |
|---|------------|------------|-------------|
| C | 1.92566200 | 2.12497100 | 0.81830900  |
| C | 2.51023000 | 3.38495900 | 0.59423800  |
| C | 3.55422200 | 3.52754700 | -0.34957500 |
| C | 4.02892400 | 2.43655500 | -1.06459100 |
| C | 3.46586500 | 1.16957400 | -0.83829400 |
| C | 2.41133300 | 1.03695300 | 0.11066400  |
| H | 1.10996500 | 2.02175200 | 1.52793700  |
| H | 3.98309300 | 4.51178700 | -0.50957400 |
| H | 4.83162900 | 2.56499400 | -1.78518800 |

|    |             |             |             |
|----|-------------|-------------|-------------|
| C  | 3.79021900  | -0.12421100 | -1.39475300 |
| H  | 4.58601400  | -0.31446100 | -2.10278400 |
| C  | 2.96908400  | -1.05503600 | -0.80999300 |
| C  | 1.99703200  | -0.38595300 | 0.11300400  |
| C  | 1.44987900  | -1.17111700 | 1.19207300  |
| H  | 0.88256900  | -0.32228000 | -0.88933700 |
| C  | 2.26667700  | -3.16648400 | 0.04317900  |
| C  | 1.58041400  | -2.59996100 | 1.07953400  |
| H  | 2.32964700  | -4.24060400 | -0.08454300 |
| H  | 1.08705700  | -3.23616600 | 1.80375900  |
| C  | 3.87105900  | -3.07142700 | -1.83502800 |
| H  | 4.91572200  | -2.87893800 | -1.56059700 |
| H  | 3.69246900  | -4.14772400 | -1.83109900 |
| H  | 3.69457300  | -2.68230300 | -2.84289100 |
| N  | 2.96612600  | -2.42637800 | -0.89074300 |
| Br | -1.98531100 | -1.49503700 | 1.91125100  |
| C  | -3.45106300 | 0.74145900  | -0.82477600 |
| C  | -4.72147500 | 0.78983600  | -1.68148100 |
| H  | -3.66448300 | 0.44256600  | 0.20765200  |
| H  | -2.96409800 | 1.72322700  | -0.77594500 |
| H  | -4.47266400 | 1.04436200  | -2.71910500 |
| H  | -5.21189900 | -0.18886500 | -1.69225400 |
| P  | -2.16512900 | -0.46021600 | -1.41243800 |
| H  | -2.93508300 | -1.61609700 | -1.66928000 |
| H  | -1.98133700 | -0.04375500 | -2.75446800 |
| P  | -5.90307000 | 2.13282300  | -1.06841700 |
| H  | -7.02880000 | 1.72806800  | -1.84354400 |
| H  | -6.35080100 | 1.44978300  | 0.09901200  |
| Pd | -0.38741100 | -0.82906600 | 0.03730800  |
| H  | 1.19909700  | -0.71648500 | 2.14513800  |
| C  | 2.04551600  | 4.52976800  | 1.31622100  |
| N  | 1.67182500  | 5.46506000  | 1.90040000  |

## D

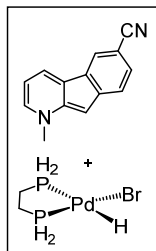

Zero-point correction= 0.307794 (Hartree/Particle)  
 Thermal correction to Energy= 0.331737  
 Thermal correction to Enthalpy= 0.332681  
 Thermal correction to Gibbs Free Energy= 0.241634  
 Sum of electronic and zero-point Energies= -4111.207245  
 Sum of electronic and thermal Energies= -4111.183302  
 Sum of electronic and thermal Enthalpies= -4111.182358  
 Sum of electronic and thermal Free Energies= -4111.273405  
 Electronic energy (RM06) -4113.80227377

|   |             |             |             |
|---|-------------|-------------|-------------|
| C | 27.78983800 | -0.78599700 | -0.44132300 |
| C | 28.90625700 | 0.01708700  | -0.71838900 |
| C | 28.80149400 | 1.43096100  | -0.65296500 |
| C | 27.60649200 | 2.04585400  | -0.31706500 |
| C | 26.47489500 | 1.25675500  | -0.03544400 |
| C | 26.58630000 | -0.17412400 | -0.10358600 |
| H | 27.87988400 | -1.86731700 | -0.49399900 |

|    |              |             |             |
|----|--------------|-------------|-------------|
| H  | 29.68037200  | 2.02945100  | -0.87211000 |
| H  | 27.54767500  | 3.13008100  | -0.27251000 |
| C  | 25.13385900  | 1.61885100  | 0.33261900  |
| H  | 24.76549400  | 2.62811100  | 0.45782700  |
| C  | 24.43117200  | 0.43864800  | 0.48830600  |
| C  | 25.28779800  | -0.71727700 | 0.22832400  |
| C  | 24.77684900  | -1.98640600 | 0.32933000  |
| C  | 22.62726400  | -1.05380000 | 0.92763700  |
| C  | 23.41300200  | -2.15478100 | 0.68798400  |
| H  | 21.58223800  | -1.13505400 | 1.20350300  |
| H  | 22.97608900  | -3.14232000 | 0.77703700  |
| C  | 22.26227600  | 1.37775600  | 1.09197900  |
| H  | 22.22040600  | 2.01375200  | 0.20118200  |
| H  | 21.25533000  | 1.04499600  | 1.34808900  |
| H  | 22.67443500  | 1.96340000  | 1.92075900  |
| N  | 23.11181300  | 0.21977300  | 0.83368600  |
| H  | 25.39661100  | -2.85887300 | 0.13991700  |
| C  | 30.15362400  | -0.58923300 | -1.06767600 |
| N  | 31.16969900  | -1.08302700 | -1.35212400 |
| C  | -24.27916500 | -0.30296800 | 0.61632900  |
| H  | -25.18939500 | -0.87571400 | 0.41323500  |
| H  | -24.24790700 | -0.11319100 | 1.69603400  |
| C  | -24.30161500 | 1.03123100  | -0.15395400 |
| H  | -24.46244100 | 0.84808800  | -1.22319900 |
| H  | -25.11947500 | 1.67076000  | 0.19436900  |
| P  | -22.73180100 | -1.28795300 | 0.20309100  |
| P  | -22.65650500 | 1.92208000  | -0.01871800 |
| H  | -23.16795300 | -2.05827300 | -0.90140000 |
| H  | -22.77936400 | -2.31036400 | 1.17760900  |
| H  | -22.80138400 | 2.95827400  | -0.96636900 |
| H  | -22.81961200 | 2.69306100  | 1.15586000  |
| Pd | -20.96032900 | 0.39066000  | -0.09848200 |
| H  | -19.93172800 | 1.55080200  | -0.30569200 |
| Br | -18.98434800 | -1.09498600 | -0.21511800 |

## Pd species from scheme 2.9

### A+ and A: Pd

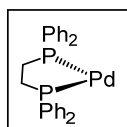

|                                              |                             |
|----------------------------------------------|-----------------------------|
| Zero-point correction=                       | 0.424896 (Hartree/Particle) |
| Thermal correction to Energy=                | 0.451963                    |
| Thermal correction to Enthalpy=              | 0.452907                    |
| Thermal correction to Gibbs Free Energy=     | 0.361974                    |
| Sum of electronic and zero-point Energies=   | -1814.261653                |
| Sum of electronic and thermal Energies=      | -1814.234586                |
| Sum of electronic and thermal Enthalpies=    | -1814.233642                |
| Sum of electronic and thermal Free Energies= | -1814.324575                |
| Electronic energy (RM06)                     | -1814.17569916              |

|    |             |             |             |
|----|-------------|-------------|-------------|
| Pd | -0.00015900 | -0.06189200 | 1.70892000  |
| C  | -0.68426300 | 0.32921700  | -1.35442500 |
| H  | -1.24022000 | 0.07226900  | -2.26432200 |
| H  | -0.51249800 | 1.41098400  | -1.38208000 |
| C  | 0.66399200  | -0.41878500 | -1.33896100 |
| H  | 0.49321500  | -1.50097100 | -1.29118300 |
| H  | 1.20927000  | -0.23610400 | -2.27359100 |

|   |             |             |             |
|---|-------------|-------------|-------------|
| P | -1.74763000 | -0.01112600 | 0.17713600  |
| P | 1.73369100  | -0.03138500 | 0.16837800  |
| C | -3.08471500 | 1.25084300  | -0.05438400 |
| C | -2.72301200 | 2.61015900  | -0.09006100 |
| C | -4.45037200 | 0.92674700  | -0.07673900 |
| C | -3.69214200 | 3.60797100  | -0.17846800 |
| H | -1.67482300 | 2.89483100  | -0.03404400 |
| C | -5.42120800 | 1.92812600  | -0.15616700 |
| H | -4.76268000 | -0.11176700 | -0.03326500 |
| C | -5.04791700 | 3.27098600  | -0.21383100 |
| H | -3.38789700 | 4.65108900  | -0.21227600 |
| H | -6.47295500 | 1.65326400  | -0.17464200 |
| H | -5.80426300 | 4.04866300  | -0.27766400 |
| C | -2.55923000 | -1.61110000 | -0.28320600 |
| C | -3.19471600 | -1.82703300 | -1.51841900 |
| C | -2.51112100 | -2.66722000 | 0.63839900  |
| C | -3.76339200 | -3.06432700 | -1.82114500 |
| H | -3.26059700 | -1.02105200 | -2.24458000 |
| C | -3.07969700 | -3.90752100 | 0.33740400  |
| H | -2.01942300 | -2.50847300 | 1.59514700  |
| C | -3.70566600 | -4.10811100 | -0.89324700 |
| H | -4.25236100 | -3.21435100 | -2.78036200 |
| H | -3.03189600 | -4.71448900 | 1.06386800  |
| H | -4.14779500 | -5.07227300 | -1.13042600 |
| C | 3.12745100  | -1.22327500 | -0.11251000 |
| C | 4.22207800  | -0.96413100 | -0.95173200 |
| C | 3.06681400  | -2.45647000 | 0.55563300  |
| C | 5.22552700  | -1.91956800 | -1.12346100 |
| H | 4.29786400  | -0.01064400 | -1.46645400 |
| C | 4.06310400  | -3.41662100 | 0.37389900  |
| H | 2.23554500  | -2.65475600 | 1.22895700  |
| C | 5.14677000  | -3.14883100 | -0.46524500 |
| H | 6.07027600  | -1.70274500 | -1.77263400 |
| H | 3.99920900  | -4.36743900 | 0.89681500  |
| H | 5.92964300  | -3.89070300 | -0.59975200 |
| C | 2.48810300  | 1.61323800  | -0.22869300 |
| C | 2.54001100  | 2.17984100  | -1.51256800 |
| C | 3.02291900  | 2.34715200  | 0.84410700  |
| C | 3.11557300  | 3.43657400  | -1.71790500 |
| H | 2.13172000  | 1.64689000  | -2.36593600 |
| C | 3.61007500  | 3.59539600  | 0.63903900  |
| H | 2.96637900  | 1.93404800  | 1.84831500  |
| C | 3.65572900  | 4.14555300  | -0.64425000 |
| H | 3.14186700  | 3.85926900  | -2.71913900 |
| H | 4.02158300  | 4.14337300  | 1.48264000  |
| H | 4.10306100  | 5.12291100  | -0.80479800 |

**A''**

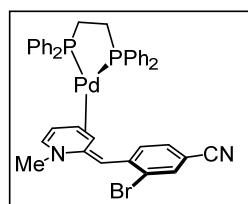

Zero-point correction= 0.641456 (Hartree/Particle)  
 Thermal correction to Energy= 0.685052  
 Thermal correction to Enthalpy= 0.685996  
 Thermal correction to Gibbs Free Energy= 0.557068

Sum of electronic and zero-point Energies= -5035.041965  
 Sum of electronic and thermal Energies= -5034.998369  
 Sum of electronic and thermal Enthalpies= -5034.997425  
 Sum of electronic and thermal Free Energies= -5035.126353  
 Electronic energy (RM06) -5037.50355013

|    |             |             |             |
|----|-------------|-------------|-------------|
| C  | 5.40160800  | 0.87020000  | -0.79162300 |
| C  | 5.17466900  | 1.99904600  | -1.59938200 |
| C  | 4.11551400  | 1.95914400  | -2.52520600 |
| C  | 3.29830800  | 0.84562400  | -2.60607900 |
| C  | 3.44803300  | -0.29527000 | -1.76707300 |
| C  | 4.56876800  | -0.23100700 | -0.88905500 |
| H  | 6.22278500  | 0.86730900  | -0.08472800 |
| H  | 3.95685600  | 2.79910600  | -3.19460100 |
| H  | 2.54444500  | 0.81927100  | -3.38349300 |
| C  | 2.60859300  | -1.46464000 | -1.83017700 |
| H  | 3.09482400  | -2.36546200 | -1.48554500 |
| C  | 1.26641200  | -1.56386400 | -2.17907600 |
| C  | 0.36409100  | -0.44215300 | -2.41802400 |
| C  | -0.96825700 | -0.62773400 | -2.86828300 |
| H  | 0.81991900  | 0.52932100  | -2.53218900 |
| C  | -0.63266700 | -3.01055700 | -2.68836700 |
| C  | -1.45425300 | -1.98207000 | -3.00278900 |
| H  | -0.95135900 | -4.04435500 | -2.74763400 |
| H  | -2.46679200 | -2.18255300 | -3.33402100 |
| Pd | -1.07538300 | -0.05119700 | -0.73411600 |
| C  | -1.76289400 | 1.05092400  | 2.38357700  |
| H  | -1.63647000 | 1.01273100  | 3.47222600  |
| H  | -1.78234100 | 2.11270100  | 2.10946300  |
| C  | -3.08098400 | 0.37996000  | 1.96147800  |
| H  | -3.09851300 | -0.66769700 | 2.28155800  |
| H  | -3.93316400 | 0.87730200  | 2.43902600  |
| P  | -0.27086800 | 0.34330300  | 1.48964600  |
| P  | -3.28013600 | 0.38208600  | 0.08733700  |
| Br | 4.99181600  | -1.71254000 | 0.26441400  |
| C  | 1.48639400  | -4.02201000 | -2.02058000 |
| H  | 1.82308600  | -4.04532700 | -0.97757100 |
| H  | 0.88004200  | -4.90861700 | -2.21061700 |
| H  | 2.36778700  | -4.04855400 | -2.67154600 |
| N  | 0.68474500  | -2.83333200 | -2.28347500 |
| H  | -1.47866600 | 0.17259500  | -3.39659200 |
| C  | 6.00920000  | 3.15180400  | -1.48438300 |
| N  | 6.68055800  | 4.09945500  | -1.38846200 |
| C  | -4.71443000 | -0.75795700 | -0.14297700 |
| C  | -4.60060300 | -2.08013900 | 0.32471700  |
| C  | -5.86480000 | -0.40280500 | -0.86469300 |
| C  | -5.62023800 | -3.00553100 | 0.10790600  |
| H  | -3.70399100 | -2.39553400 | 0.85289800  |
| C  | -6.88145600 | -1.33430500 | -1.08913600 |
| H  | -5.97350700 | 0.60532100  | -1.25171400 |
| C  | -6.76740500 | -2.63535800 | -0.59899400 |
| H  | -5.51551600 | -4.01918000 | 0.48612600  |
| H  | -7.76574600 | -1.03727700 | -1.64718400 |
| H  | -7.56077900 | -3.35755400 | -0.77141100 |
| C  | -3.96513100 | 2.06987700  | -0.21812100 |
| C  | -5.08886400 | 2.57468000  | 0.45943200  |
| C  | -3.30837700 | 2.89620800  | -1.14168400 |
| C  | -5.54183300 | 3.87115000  | 0.21635900  |
| H  | -5.62143400 | 1.94992100  | 1.17181700  |
| C  | -3.75976800 | 4.19618200  | -1.38393800 |
| H  | -2.43503000 | 2.51159400  | -1.66265000 |

|   |             |             |             |
|---|-------------|-------------|-------------|
| C | -4.87658800 | 4.68477200  | -0.70554300 |
| H | -6.41280200 | 4.24759700  | 0.74645600  |
| H | -3.23766500 | 4.82485000  | -2.10022900 |
| H | -5.22906200 | 5.69572400  | -0.89197900 |
| C | 1.04445000  | 1.55221900  | 1.95320000  |
| C | 1.62613500  | 2.33530300  | 0.94644500  |
| C | 1.47206800  | 1.72139200  | 3.28065000  |
| C | 2.60913700  | 3.27781800  | 1.25879500  |
| H | 1.31664500  | 2.19237100  | -0.08527300 |
| C | 2.45210900  | 2.66301400  | 3.59190500  |
| H | 1.04981700  | 1.10597500  | 4.07094300  |
| C | 3.02115200  | 3.44373700  | 2.58135500  |
| H | 3.06092000  | 3.87017800  | 0.46821000  |
| H | 2.77752600  | 2.78379100  | 4.62198100  |
| H | 3.79047800  | 4.17186900  | 2.82392300  |
| C | 0.19052700  | -1.15493300 | 2.46750400  |
| C | -0.53866800 | -1.63923600 | 3.56372000  |
| C | 1.32855800  | -1.86861900 | 2.04971400  |
| C | -0.14148900 | -2.80459400 | 4.22670800  |
| H | -1.42113100 | -1.11434000 | 3.91637500  |
| C | 1.73181000  | -3.02083200 | 2.72134800  |
| H | 1.90725100  | -1.51951100 | 1.19838500  |
| C | 0.99507400  | -3.49669900 | 3.81023300  |
| H | -0.72062400 | -3.16465100 | 5.07333100  |
| H | 2.62461300  | -3.54562400 | 2.39157800  |
| H | 1.30615500  | -4.39946400 | 4.32918700  |

**A+''**

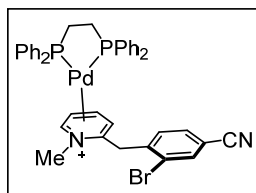

Zero-point correction= 0.654799 (Hartree/Particle)  
 Thermal correction to Energy= 0.698609  
 Thermal correction to Enthalpy= 0.699553  
 Thermal correction to Gibbs Free Energy= 0.568000  
 Sum of electronic and zero-point Energies= -5035.467829  
 Sum of electronic and thermal Energies= -5035.424020  
 Sum of electronic and thermal Enthalpies= -5035.423075  
 Sum of electronic and thermal Free Energies= -5035.554628  
 Electronic energy (RM06) -5037.97523761

|   |            |             |             |
|---|------------|-------------|-------------|
| C | 7.12746800 | 0.02897200  | -0.42521300 |
| C | 7.26348500 | 0.37804100  | -1.77685400 |
| C | 6.12776900 | 0.73081800  | -2.52109800 |
| C | 4.87808500 | 0.72447400  | -1.91151000 |
| C | 4.70988400 | 0.37265700  | -0.56364000 |
| C | 5.86497100 | 0.03107800  | 0.16094000  |
| H | 7.99977200 | -0.23995700 | 0.15845700  |
| H | 6.23090800 | 1.00791200  | -3.56466400 |
| H | 4.00512700 | 1.00575000  | -2.49313000 |
| C | 2.15832400 | 0.19792500  | -0.83122200 |
| C | 1.32174000 | 1.21318100  | -1.20061900 |
| C | 0.17638100 | 1.02008300  | -2.05687500 |
| H | 1.53227100 | 2.20664800  | -0.81861800 |
| C | 0.88577900 | -1.31801200 | -2.16858200 |



|    |             |             |             |
|----|-------------|-------------|-------------|
| C  | 0.03017800  | -0.30964000 | -2.60223700 |
| H  | 0.77489800  | -2.33512100 | -2.52743500 |
| H  | -0.63071500 | -0.52314900 | -3.43583800 |
| Pd | -1.35559500 | 0.04739400  | -0.87089100 |
| C  | -3.71116600 | 0.69873700  | 1.45434600  |
| H  | -4.02901100 | 1.24982700  | 2.34702000  |
| H  | -4.58759500 | 0.62828800  | 0.79946300  |
| C  | -3.22036400 | -0.71258600 | 1.82342200  |
| H  | -2.38381500 | -0.66327800 | 2.52871400  |
| H  | -4.02195500 | -1.27546200 | 2.31415600  |
| P  | -2.45162700 | 1.68731300  | 0.47787200  |
| P  | -2.60375300 | -1.64268300 | 0.31301000  |
| Br | 5.76427800  | -0.43874600 | 2.01333900  |
| C  | 2.69298400  | -2.24883900 | -0.83462500 |
| H  | 2.39540100  | -2.49440300 | 0.18981800  |
| H  | 2.49086500  | -3.10814000 | -1.47470400 |
| H  | 3.76072800  | -2.03058200 | -0.86746200 |
| N  | 1.92043600  | -1.09782100 | -1.32998800 |
| H  | -0.22975400 | 1.87652800  | -2.58513000 |
| C  | 3.33254000  | 0.41205300  | 0.09081000  |
| H  | 3.19833600  | 1.39051500  | 0.56809700  |
| H  | 3.30717500  | -0.30982800 | 0.91364400  |
| C  | 8.56022500  | 0.37099900  | -2.38908700 |
| N  | 9.60900400  | 0.36329100  | -2.89064200 |
| C  | -4.13364900 | -2.31830300 | -0.44147600 |
| C  | -4.38288000 | -2.06664100 | -1.79922600 |
| C  | -5.07641200 | -3.05306100 | 0.29965200  |
| C  | -5.54926200 | -2.53720600 | -2.40647600 |
| H  | -3.66062500 | -1.49552100 | -2.37724800 |
| C  | -6.24019700 | -3.52253100 | -0.30793900 |
| H  | -4.89878300 | -3.27128200 | 1.34943800  |
| C  | -6.47827200 | -3.26411000 | -1.66122200 |
| H  | -5.73151300 | -2.33463100 | -3.45798700 |
| H  | -6.96137800 | -4.08987000 | 0.27334600  |
| H  | -7.38664400 | -3.62956200 | -2.13144000 |
| C  | -1.69679600 | -3.07506400 | 1.03103900  |
| C  | -0.61804900 | -2.82154000 | 1.89811000  |
| C  | -1.97844200 | -4.40233500 | 0.67507000  |
| C  | 0.14194500  | -3.87073600 | 2.41368300  |
| H  | -0.36883700 | -1.80000700 | 2.17681200  |
| C  | -1.20867300 | -5.45114400 | 1.18577000  |
| H  | -2.80220100 | -4.62375000 | 0.00423200  |
| C  | -0.15122200 | -5.19078200 | 2.05735500  |
| H  | 0.95839100  | -3.65956600 | 3.09925300  |
| H  | -1.44405200 | -6.47375900 | 0.90456300  |
| H  | 0.43960000  | -6.00855200 | 2.45966400  |
| C  | -3.45484000 | 3.01068800  | -0.30298400 |
| C  | -3.95062800 | 4.09962000  | 0.43367400  |
| C  | -3.76931400 | 2.90541400  | -1.66651900 |
| C  | -4.74948900 | 5.06002600  | -0.18643700 |
| H  | -3.70650600 | 4.20350700  | 1.48709900  |
| C  | -4.57265000 | 3.86632600  | -2.28318400 |
| H  | -3.38192100 | 2.06831600  | -2.24264800 |
| C  | -5.06197100 | 4.94441200  | -1.54373700 |
| H  | -5.12768900 | 5.89963700  | 0.38973700  |
| H  | -4.80998500 | 3.77628600  | -3.33943000 |
| H  | -5.68254000 | 5.69571900  | -2.02362000 |
| C  | -1.41498900 | 2.56140500  | 1.71778900  |
| C  | -0.56288200 | 3.58669000  | 1.26736900  |
| C  | -1.38707200 | 2.21113200  | 3.07605600  |
| C  | 0.28286500  | 4.24956600  | 2.15478200  |

|   |             |            |            |
|---|-------------|------------|------------|
| H | -0.58128100 | 3.88464600 | 0.22186700 |
| C | -0.53149900 | 2.87107900 | 3.96245500 |
| H | -2.03702400 | 1.43133000 | 3.46028000 |
| C | 0.30399100  | 3.89024200 | 3.50587700 |
| H | 0.92039100  | 5.05225200 | 1.79447600 |
| H | -0.52816500 | 2.59216000 | 5.01239600 |
| H | 0.96301600  | 4.40682700 | 4.19750600 |

## A TS

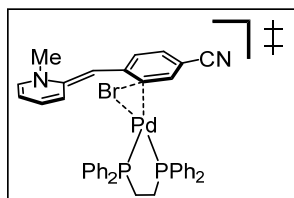

|                                              |                             |
|----------------------------------------------|-----------------------------|
| Zero-point correction=                       | 0.640218 (Hartree/Particle) |
| Thermal correction to Energy=                | 0.683690                    |
| Thermal correction to Enthalpy=              | 0.684634                    |
| Thermal correction to Gibbs Free Energy=     | 0.556466                    |
| Sum of electronic and zero-point Energies=   | -5035.018761                |
| Sum of electronic and thermal Energies=      | -5034.975290                |
| Sum of electronic and thermal Enthalpies=    | -5034.974345                |
| Sum of electronic and thermal Free Energies= | -5035.102513                |
| Electronic energy (RM06)                     | -5037.48285224              |

|    |             |             |             |
|----|-------------|-------------|-------------|
| C  | 0.36223000  | 2.71984900  | -1.60061300 |
| C  | -0.06233800 | 4.00336300  | -1.18952200 |
| C  | -1.41751300 | 4.20246300  | -0.88741500 |
| C  | -2.32073300 | 3.14675400  | -0.97900600 |
| C  | -1.93875300 | 1.82745500  | -1.31771000 |
| C  | -0.53826000 | 1.64754500  | -1.57378000 |
| H  | 1.37569200  | 2.57648600  | -1.95812200 |
| H  | -1.76965000 | 5.19646200  | -0.63007500 |
| H  | -3.37248100 | 3.35934800  | -0.82139100 |
| C  | -2.85195500 | 0.72043000  | -1.46200900 |
| H  | -2.47805500 | -0.06063900 | -2.10989900 |
| C  | -4.09543300 | 0.54989500  | -0.88016200 |
| C  | -4.61985100 | 1.31248400  | 0.23081800  |
| C  | -5.84826900 | 1.07545100  | 0.77112500  |
| H  | -3.96743300 | 2.05229200  | 0.67462800  |
| C  | -6.17761200 | -0.71203500 | -0.77491000 |
| C  | -6.67909700 | 0.04110700  | 0.24246100  |
| H  | -6.73191000 | -1.53494300 | -1.21173100 |
| H  | -7.66590200 | -0.16509700 | 0.63856900  |
| Pd | 0.75147200  | 0.33139600  | -0.55821400 |
| C  | 0.87480400  | -1.86948500 | 2.01686100  |
| H  | 0.55468500  | -2.20368000 | 3.01027200  |
| H  | 0.99007300  | -2.76800400 | 1.40027600  |
| C  | 2.21704300  | -1.12754400 | 2.11291900  |
| H  | 2.11463600  | -0.23627900 | 2.74407200  |
| H  | 2.96555100  | -1.78062100 | 2.57754900  |
| P  | -0.47969000 | -0.82545900 | 1.21736000  |
| P  | 2.77307000  | -0.53938200 | 0.42392300  |
| Br | 0.03758200  | 0.15999300  | -3.17927300 |
| C  | -4.49074600 | -1.35679000 | -2.41084400 |
| H  | -3.62554000 | -1.94998400 | -2.09658500 |
| H  | -5.30100300 | -2.03163200 | -2.69071300 |
| H  | -4.20643000 | -0.75212700 | -3.27857200 |
| N  | -4.94415600 | -0.49045700 | -1.32720200 |

|   |             |             |             |
|---|-------------|-------------|-------------|
| H | -6.18446000 | 1.65796200  | 1.62440200  |
| C | -1.75954500 | -2.13397800 | 0.94047900  |
| C | -1.43461400 | -3.20048000 | 0.08086200  |
| C | -3.05631600 | -2.08022100 | 1.47369300  |
| C | -2.36391800 | -4.19993700 | -0.20377900 |
| H | -0.45040400 | -3.24675500 | -0.37916300 |
| C | -3.99003800 | -3.07784900 | 1.18033300  |
| H | -3.34541900 | -1.25694900 | 2.11819300  |
| C | -3.64720600 | -4.14469200 | 0.34876100  |
| H | -2.08639500 | -5.02073200 | -0.86026500 |
| H | -4.98824700 | -3.01540300 | 1.60596500  |
| H | -4.37169000 | -4.92452200 | 0.12887900  |
| C | -1.10105800 | 0.14714200  | 2.66159000  |
| C | -1.15917000 | 1.54395000  | 2.54137600  |
| C | -1.46556000 | -0.44022400 | 3.88617900  |
| C | -1.57175900 | 2.33530000  | 3.61719400  |
| H | -0.87419500 | 2.01089900  | 1.60300400  |
| C | -1.87818100 | 0.34917100  | 4.95937300  |
| H | -1.43651000 | -1.52064400 | 4.00188500  |
| C | -1.93102200 | 1.73989700  | 4.82653100  |
| H | -1.60532700 | 3.41592900  | 3.50789000  |
| H | -2.15606600 | -0.11981400 | 5.89982700  |
| H | -2.24838400 | 2.35451700  | 5.66486700  |
| C | 3.50315000  | -2.07258400 | -0.31121600 |
| C | 2.90247000  | -2.60751200 | -1.46083100 |
| C | 4.61996800  | -2.72280700 | 0.23823200  |
| C | 3.40094300  | -3.77738800 | -2.04122700 |
| H | 2.05222800  | -2.09485800 | -1.90490300 |
| C | 5.11710700  | -3.88899500 | -0.34239500 |
| H | 5.11485600  | -2.30924400 | 1.11327400  |
| C | 4.50597600  | -4.41997500 | -1.48233500 |
| H | 2.92867600  | -4.17926500 | -2.93382700 |
| H | 5.98444200  | -4.38124600 | 0.09000900  |
| H | 4.89661100  | -5.32725400 | -1.93575100 |
| C | 4.23548200  | 0.52197200  | 0.78933700  |
| C | 4.95533300  | 0.47541200  | 1.99426400  |
| C | 4.63620600  | 1.43671200  | -0.19844700 |
| C | 6.05060000  | 1.31698600  | 2.20081500  |
| H | 4.66464300  | -0.21142600 | 2.78372600  |
| C | 5.73580500  | 2.27008200  | 0.00431900  |
| H | 4.07317600  | 1.50234900  | -1.12619600 |
| C | 6.44518400  | 2.21276100  | 1.20605300  |
| H | 6.59353800  | 1.27232900  | 3.14142300  |
| H | 6.02856800  | 2.97377300  | -0.76995100 |
| H | 7.29533800  | 2.86943900  | 1.36956900  |
| C | 0.86622200  | 5.08849400  | -1.14693000 |
| N | 1.62580700  | 5.97115500  | -1.10432400 |

### A+TS

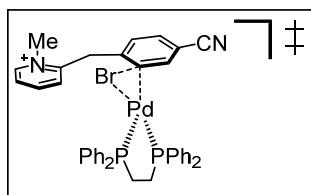

Zero-point correction= 0.653770 (Hartree/Particle)  
 Thermal correction to Energy= 0.697340

Thermal correction to Enthalpy= 0.698284  
 Thermal correction to Gibbs Free Energy= 0.569035  
 Sum of electronic and zero-point Energies= -5035.435488  
 Sum of electronic and thermal Energies= -5035.391918  
 Sum of electronic and thermal Enthalpies= -5035.390974  
 Sum of electronic and thermal Free Energies= -5035.520223  
 Electronic energy (RM06) -5037.48285224

|    |             |             |             |
|----|-------------|-------------|-------------|
| C  | -0.27579000 | 2.57972200  | -1.21686800 |
| C  | -0.44329300 | 3.84926400  | -0.62012900 |
| C  | -1.52515300 | 4.09324500  | 0.23223100  |
| C  | -2.45075800 | 3.06729000  | 0.47666300  |
| C  | -2.30533400 | 1.79745100  | -0.07499100 |
| C  | -1.14565700 | 1.52916900  | -0.85100100 |
| H  | 0.48615900  | 2.43433400  | -1.97472000 |
| H  | -1.65978500 | 5.07390900  | 0.67444400  |
| H  | -3.29176000 | 3.26405800  | 1.13844600  |
| C  | -4.28612900 | 0.49273100  | -0.95183000 |
| C  | -4.83938400 | 1.58005000  | -1.63305600 |
| C  | -5.77272000 | 1.39625300  | -2.64381000 |
| H  | -4.50077500 | 2.57241600  | -1.36000200 |
| C  | -5.61016400 | -0.95741800 | -2.28897300 |
| C  | -6.16472100 | 0.09721300  | -2.98114400 |
| H  | -5.86544000 | -1.98781400 | -2.50086200 |
| H  | -6.88572800 | -0.10012700 | -3.76585600 |
| Pd | 0.46489300  | 0.27966800  | -0.35220400 |
| C  | 1.66518400  | -1.85228700 | 2.00270500  |
| H  | 1.77723100  | -2.14298600 | 3.05304700  |
| H  | 1.53265500  | -2.77228800 | 1.42279900  |
| C  | 2.91297700  | -1.09943700 | 1.51429800  |
| H  | 3.05079800  | -0.17353700 | 2.08492800  |
| H  | 3.81143400  | -1.70501300 | 1.67596600  |
| P  | 0.10843400  | -0.81573800 | 1.80211200  |
| P  | 2.73519200  | -0.57798300 | -0.27361900 |
| Br | -1.36292400 | 0.07014700  | -2.48122700 |
| C  | -4.11938200 | -1.95821500 | -0.63950200 |
| H  | -4.26540400 | -1.91403100 | 0.44019300  |
| H  | -4.61844300 | -2.84261800 | -1.03262800 |
| H  | -3.05404400 | -2.00172000 | -0.87482200 |
| N  | -4.70319600 | -0.76131300 | -1.29404000 |
| H  | -6.18907400 | 2.25171500  | -3.16629000 |
| C  | -3.30608900 | 0.69630200  | 0.19042900  |
| H  | -3.89566100 | 0.93587400  | 1.08676300  |
| H  | -2.76507400 | -0.22536400 | 0.40730300  |
| C  | 0.49235000  | 4.89388300  | -0.92149100 |
| N  | 1.26750600  | 5.72883900  | -1.15556200 |
| C  | 4.17595900  | 0.53143500  | -0.54972000 |
| C  | 3.98329400  | 1.91033200  | -0.36345700 |
| C  | 5.44470300  | 0.06520600  | -0.92727800 |
| C  | 5.04135400  | 2.80391800  | -0.53097900 |
| H  | 2.99806200  | 2.28597600  | -0.09691100 |
| C  | 6.49970200  | 0.96204300  | -1.10159200 |
| H  | 5.60985800  | -0.99389200 | -1.09929900 |
| C  | 6.30168700  | 2.32994000  | -0.90098500 |
| H  | 4.87554100  | 3.86791200  | -0.38792500 |
| H  | 7.47667000  | 0.59089000  | -1.39859100 |
| H  | 7.12449700  | 3.02501800  | -1.04204400 |
| C  | 3.06433300  | -2.10440100 | -1.24701300 |
| C  | 2.41305700  | -2.23536000 | -2.48526700 |
| C  | 3.92442200  | -3.13224500 | -0.82477800 |
| C  | 2.62958100  | -3.35590400 | -3.28831000 |

|   |             |             |             |
|---|-------------|-------------|-------------|
| H | 1.73100700  | -1.45618200 | -2.81628100 |
| C | 4.13264800  | -4.25728100 | -1.62497200 |
| H | 4.44321600  | -3.06335400 | 0.12708500  |
| C | 3.48878000  | -4.36943700 | -2.85901700 |
| H | 2.12427900  | -3.43832100 | -4.24659600 |
| H | 4.80120400  | -5.04343800 | -1.28523000 |
| H | 3.65520300  | -5.24393700 | -3.48169400 |
| C | 0.16290000  | 0.25878100  | 3.29790800  |
| C | 0.18776500  | 1.65085500  | 3.12473300  |
| C | 0.24156100  | -0.26546800 | 4.60124200  |
| C | 0.29054900  | 2.50243400  | 4.22796500  |
| H | 0.13664300  | 2.06497300  | 2.12147400  |
| C | 0.33998400  | 0.58545600  | 5.70116400  |
| H | 0.21827600  | -1.34034800 | 4.76097300  |
| C | 0.36608600  | 1.97121400  | 5.51557000  |
| H | 0.31544600  | 3.57821000  | 4.07880800  |
| H | 0.40086300  | 0.16863000  | 6.70258000  |
| H | 0.44798200  | 2.63216100  | 6.37379700  |
| C | -1.22625100 | -2.04835000 | 2.14885900  |
| C | -2.27766500 | -1.78749600 | 3.04482600  |
| C | -1.25941100 | -3.24958000 | 1.41430900  |
| C | -3.31547300 | -2.70846900 | 3.21772000  |
| H | -2.27698800 | -0.87256200 | 3.62917500  |
| C | -2.28945700 | -4.17321900 | 1.59675400  |
| H | -0.47480800 | -3.47352300 | 0.69601800  |
| C | -3.32248800 | -3.90751200 | 2.50128400  |
| H | -4.10700800 | -2.49549100 | 3.93153900  |
| H | -2.27836900 | -5.10653000 | 1.03989200  |
| H | -4.11726400 | -4.63238000 | 2.65367900  |

### Transition State Computational Studies for the Asymmetric Hydrogenation Reaction

All optimizations and transition state searches were performed with the Gaussian 09 program<sup>2</sup> on a Unix HPC platform. All structures were optimized at the B3LYP<sup>3</sup> level of theory employing the LANL2DZ basis set with ECP for Ir<sup>4</sup> and D95v for the remaining atoms.<sup>9</sup> All optimized structures were subjected to a frequency test to verify a single imaginary frequency was found (Transition states) and that the imaginary vibrational mode corresponds with the expected reaction pathway. All stable structures were subjected to a frequency test to verify no imaginary frequencies. The resulting transition state structures was subjected to an IRC calculation (B3LYP/LANL2DZ) to verify a clean reaction pathway from the starting material to the respected product. An outer-sphere dissociated mechanism<sup>10</sup> similar to the DFT computed Ir-hydrogenation mechanism of imines<sup>11</sup> and quinolines<sup>12</sup> was used as the basis for the computational studies of the asymmetric Ir-hydrogenation of the enamine intermediate (Figure 1). An iodo-Ir complex was found to be a viable catalyst for the sequential protonation and hydride delivery pathway for the enamine hydrogenation with a maximum energy barrier of 26 kcal/mol. A second hydrogenation pathway with an associated immonium intermediate was shown to be energetically infeasible.

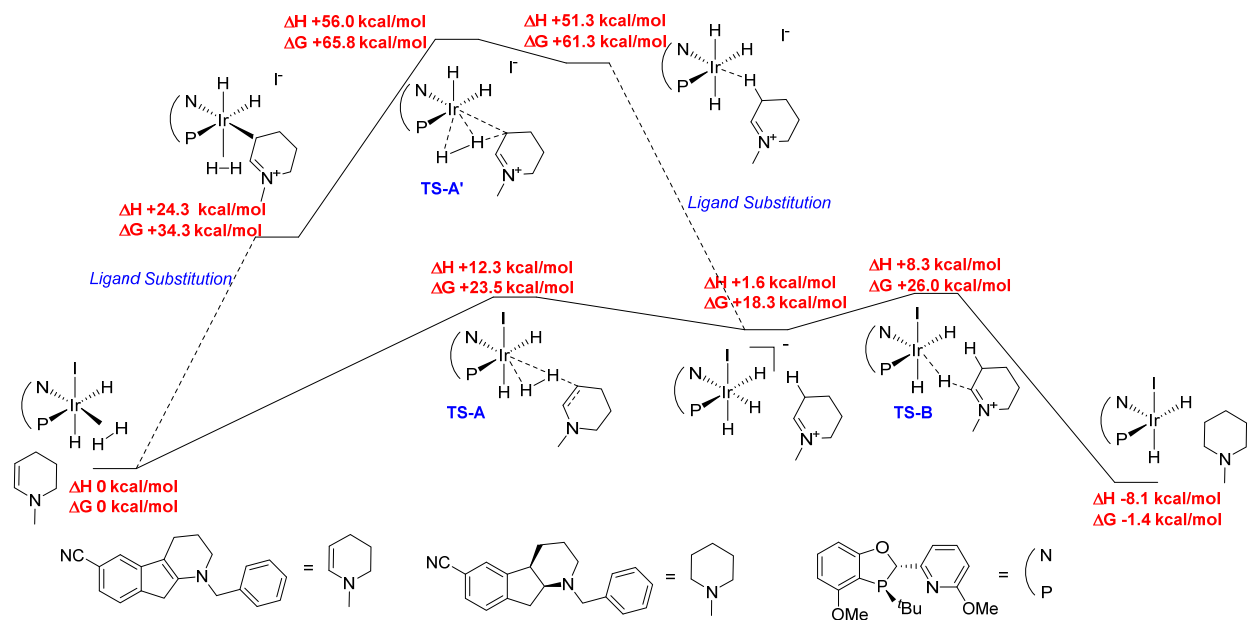

**Figure.** Reaction pathways for the Ir-BI-Ligand Asymmetric Hydrogenation (B3LYP/LANL2DZ CPCM=THF, 323.15 K, 1 atm).

**A**

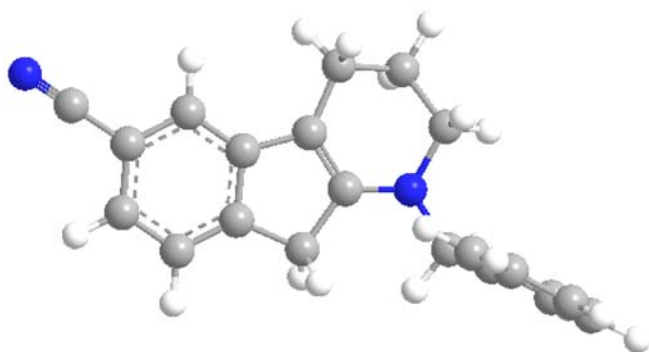

SCF Done: E(RB3LYP) = -882.325543886 A.U.  
 Temperature 298.150 Kelvin. Pressure 1.00000 Atm.  
 Zero-point correction= 0.332478 (Hartree/Particle)  
 Zero-point correction= 0.332478 (Hartree/Particle)  
 Thermal correction to Energy= 0.350185  
 Thermal correction to Enthalpy= 0.351129  
 Thermal correction to Gibbs Free Energy= 0.284661  
 Sum of electronic and zero-point Energies= -881.993066  
 Sum of electronic and thermal Energies= -881.975359  
 Sum of electronic and thermal Enthalpies= -881.974415  
 Sum of electronic and thermal Free Energies= -882.040883

Temperature 323.150 Kelvin. Pressure 1.00000 Atm.  
 Zero-point correction= 0.332478 (Hartree/Particle)  
 Thermal correction to Energy= 0.353120  
 Thermal correction to Enthalpy= 0.354143  
 Thermal correction to Gibbs Free Energy= 0.278966

| Atomic Type | Coordinates (Angstroms) |                  |                 |
|-------------|-------------------------|------------------|-----------------|
|             | X                       | Y                | Z               |
| C           | 3.912518043502          | -9.449334683573  | -2.607063805684 |
| C           | 4.638238808500          | -8.314718035112  | -2.173560597918 |
| C           | 4.276215436728          | -7.688105753906  | -0.982829426523 |
| C           | 3.184352392712          | -8.166925273679  | -0.189194319710 |
| C           | 2.455832497188          | -9.293892167828  | -0.612898414895 |
| C           | 2.831163884583          | -9.928549235229  | -1.827760450092 |
| H           | 4.177954596277          | -9.954033817477  | -3.530905713817 |
| H           | 5.467022531558          | -7.944349805790  | -2.771500312950 |
| H           | 1.623590441264          | -9.681134061730  | -0.032327226328 |
| C           | 3.038723164789          | -7.321312109579  | 0.987653929112  |
| C           | 1.999198797431          | -7.394271298319  | 2.080461958400  |
| C           | 4.011668572013          | -6.336592372749  | 0.948820343065  |
| C           | 1.907713584882          | -6.014458867863  | 2.782845060787  |
| H           | 1.016044620837          | -7.662059540116  | 1.667110381745  |
| C           | 3.307016255041          | -5.452329481334  | 3.118892468282  |
| H           | 1.386892928722          | -5.304861846954  | 2.125950766558  |
| H           | 3.790447869761          | -6.091752161833  | 3.874767197085  |
| C           | 4.876318502161          | -6.468202940239  | -0.301368452344 |
| H           | 5.939184287583          | -6.613901975192  | -0.063849735227 |
| H           | 4.813726195841          | -5.578197616068  | -0.943334588254 |
| H           | 3.215959435309          | -4.447148564398  | 3.548700722471  |
| H           | 1.328972322033          | -6.093129196027  | 3.711581702304  |
| H           | 2.245467397665          | -8.175204439876  | 2.817141735744  |
| N           | 4.162623616202          | -5.360724693232  | 1.911933239206  |
| C           | 2.099182336886          | -11.083266127541 | -2.278216792131 |
| N           | 1.495659927355          | -12.033200887651 | -2.647431317011 |
| C           | 5.246493858585          | -4.372203003280  | 1.904152152893  |
| H           | 4.826401982791          | -3.378237476730  | 2.112776219555  |
| H           | 5.666114856282          | -4.323950122992  | 0.892748266428  |
| C           | 6.375368070384          | -4.649620781804  | 2.904201949514  |
| C           | 7.049554085665          | -3.571415401569  | 3.517053262862  |
| C           | 6.784767077269          | -5.967760147440  | 3.201942370992  |

**B**

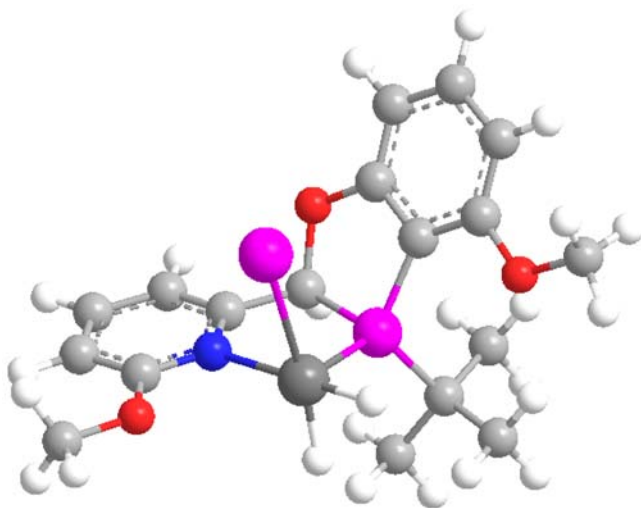

SCF Done: E(RB3LYP) = -1103.29465932  
 Temperature 298.150 Kelvin. Pressure 1.00000 Atm.

Zero-point correction= 0.390330 (Hartree/Particle)  
 Thermal correction to Energy= 0.417522  
 Thermal correction to Enthalpy= 0.418466  
 Thermal correction to Gibbs Free Energy= 0.331744  
 Sum of electronic and zero-point Energies= -1102.904329  
 Sum of electronic and thermal Energies= -1102.877137  
 Sum of electronic and thermal Enthalpies= -1102.876193  
 Sum of electronic and thermal Free Energies= -1102.962915

Temperature 323.150 Kelvin. Pressure 1.00000 Atm.  
 Zero-point correction= 0.390330 (Hartree/Particle)  
 Thermal correction to Energy= 0.421711  
 Thermal correction to Enthalpy= 0.422734  
 Thermal correction to Gibbs Free Energy= 0.324301

| Atomic Type | Coordinates (Angstroms) |                 |                 |
|-------------|-------------------------|-----------------|-----------------|
|             | X                       | Y               | Z               |
| C           | -9.629203015655         | 9.426970111035  | 3.102639345095  |
| C           | -8.770168061647         | 10.014148900830 | 2.149654171053  |
| C           | -8.600882831592         | 9.403449140794  | 0.891399715684  |
| C           | -9.283545327242         | 8.208096669312  | 0.609788796267  |
| C           | -10.145124078856        | 7.599779742616  | 1.534899797214  |
| C           | -10.302640408459        | 8.229732073697  | 2.781608329951  |
| H           | -9.777520295106         | 9.880580972412  | 4.075739439105  |
| H           | -10.657919821812        | 6.676734560158  | 1.288412215372  |
| H           | -10.960839335405        | 7.782945605492  | 3.521937410465  |
| O           | -8.052423901974         | 11.185946212940 | 2.353063404586  |
| C           | -8.134359430811         | 11.857056474342 | 3.655563852266  |
| H           | -7.782011629814         | 11.195165581296 | 4.455008045560  |
| H           | -7.476097031944         | 12.722733859319 | 3.571359399468  |
| H           | -9.160424629072         | 12.185198322957 | 3.859895482595  |
| O           | -9.065202220030         | 7.613156580860  | -0.643728331748 |
| C           | -8.208923162929         | 8.425944256709  | -1.548466880761 |
| P           | -7.483607982180         | 9.879794162226  | -0.501197855788 |
| C           | -8.071001092458         | 11.537361425196 | -1.330576069172 |
| C           | -7.398213749867         | 12.718354464537 | -0.590830064431 |
| H           | -7.720374656950         | 13.655233516470 | -1.064982673609 |
| H           | -7.681642333184         | 12.745859849367 | 0.465994982042  |
| H           | -6.306244714605         | 12.657346575225 | -0.656715074323 |
| C           | -9.611684179224         | 11.632040682383 | -1.226469706912 |
| H           | -9.938524492267         | 12.547303741828 | -1.737572335657 |
| H           | -10.119040319822        | 10.786285248306 | -1.707764348423 |
| H           | -9.945707693246         | 11.688089779622 | -0.184852393940 |
| C           | -7.620722760455         | 11.515513303928 | -2.812392168162 |
| H           | -6.536105477124         | 11.388843610878 | -2.903494466086 |
| H           | -8.115738828903         | 10.726625367210 | -3.392105946793 |
| H           | -7.889528369091         | 12.476652406809 | -3.269392299843 |
| C           | -7.130488510452         | 7.548514669984  | -2.148185917569 |
| C           | -7.478755566534         | 6.534179622134  | -3.050719781256 |
| C           | -6.463082159401         | 5.726670553955  | -3.596296810912 |
| H           | -8.518836518991         | 6.380953487791  | -3.314415311594 |
| C           | -4.848134461248         | 7.016005687719  | -2.350770101698 |
| C           | -5.126952827379         | 5.967162282365  | -3.250511499449 |
| H           | -6.707733987289         | 4.927870213836  | -4.289153352272 |
| N           | -5.825995104449         | 7.775517182594  | -1.791129841859 |
| Ir          | -5.294848017088         | 9.327146352755  | -0.339587266642 |
| O           | -3.587139969153         | 7.389710786875  | -1.956329707971 |
| C           | -2.420950467355         | 6.618679178328  | -2.415855600942 |
| H           | -2.327739003241         | 6.676857544898  | -3.506001966879 |



|   |                 |                 |                 |
|---|-----------------|-----------------|-----------------|
| H | -2.496817290608 | 5.575602031911  | -2.089431704271 |
| H | -1.565253385657 | 7.098421113106  | -1.941085500882 |
| H | -5.067902094983 | 10.420149917351 | -1.473145150543 |
| I | -5.095471417734 | 7.378223218293  | 1.788051819586  |
| H | -4.936171784350 | 10.484610536786 | 0.709833853108  |
| H | -4.330045068633 | 5.367047901972  | -3.671233776206 |
| H | -8.871236573729 | 8.803558248591  | -2.333484732821 |

---

### Iodide

SCF Done: E(RB3LYP) = -11.5603193090 A.U.

Temperature 298.150 Kelvin. Pressure 1.00000 Atm.  
 Zero-point correction= 0.000000 (Hartree/Particle)  
 Thermal correction to Energy= 0.001416  
 Thermal correction to Enthalpy= 0.002360  
 Thermal correction to Gibbs Free Energy= -0.016848  
 Sum of electronic and zero-point Energies= -11.560319  
 Sum of electronic and thermal Energies= -11.558903  
 Sum of electronic and thermal Enthalpies= -11.557959  
 Sum of electronic and thermal Free Energies= -11.577168

Temperature 323.150 Kelvin. Pressure 1.00000 Atm.  
 Zero-point correction= 0.000000 (Hartree/Particle)  
 Thermal correction to Energy= 0.001535  
 Thermal correction to Enthalpy= 0.002558  
 Thermal correction to Gibbs Free Energy= -0.018467

| Atomic |                | Coordinates (Angstroms) |                |  |
|--------|----------------|-------------------------|----------------|--|
| Type   | X              | Y                       | Z              |  |
| I      | 0.381558050000 | 1.359300460000          | 0.000000000000 |  |

---

### Hydrogen

SCF Done: E(RB3LYP) = -1.17449948 A.U.

Temperature 298.150 Kelvin. Pressure 1.00000 Atm.  
 Zero-point correction= 0.010144 (Hartree/Particle)  
 Thermal correction to Energy= 0.012504  
 Thermal correction to Enthalpy= 0.013449  
 Thermal correction to Gibbs Free Energy= -0.001346  
 Sum of electronic and zero-point Energies= -1.164356  
 Sum of electronic and thermal Energies= -1.161995  
 Sum of electronic and thermal Enthalpies= -1.161051  
 Sum of electronic and thermal Free Energies= -1.175845

Temperature 323.150 Kelvin. Pressure 1.00000 Atm.  
 Zero-point correction= 0.010144 (Hartree/Particle)  
 Thermal correction to Energy= 0.012702  
 Thermal correction to Enthalpy= 0.013726  
 Thermal correction to Gibbs Free Energy= -0.002598

| Atomic |                | Coordinates (Angstroms) |                 |  |
|--------|----------------|-------------------------|-----------------|--|
| Type   | X              | Y                       | Z               |  |
| H      | 0.000000000000 | 0.000000000000          | 0.371854993324  |  |
| H      | 0.000000000000 | 0.000000000000          | -0.371854993324 |  |

---

c

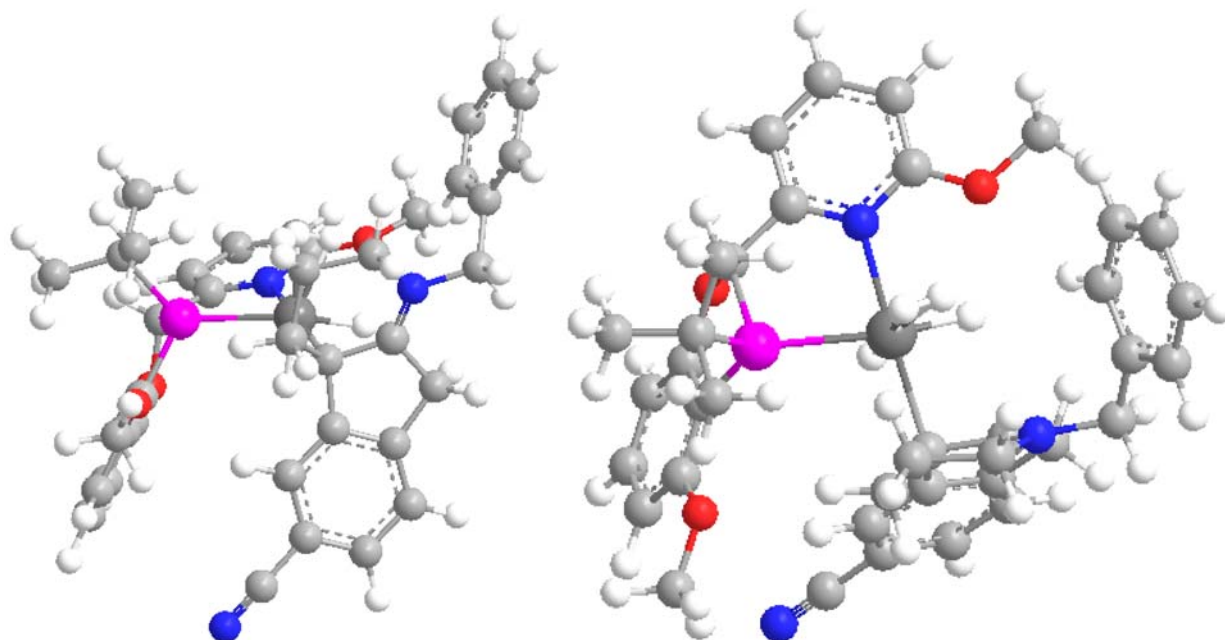

SCF Done: E(RB3LYP) = -1975.20915297

Temperature 298.150 Kelvin. Pressure 1.00000 Atm.  
 Zero-point correction= 0.741726 (Hartree/Particle)  
 Thermal correction to Energy= 0.786682  
 Thermal correction to Enthalpy= 0.787626  
 Thermal correction to Gibbs Free Energy= 0.662167  
 Sum of electronic and zero-point Energies= -1974.467427  
 Sum of electronic and thermal Energies= -1974.422471  
 Sum of electronic and thermal Enthalpies= -1974.421527  
 Sum of electronic and thermal Free Energies= -1974.546986

Temperature 323.150 Kelvin. Pressure 1.00000 Atm.  
 Zero-point correction= 0.741726 (Hartree/Particle)  
 Thermal correction to Energy= 0.793959  
 Thermal correction to Enthalpy= 0.794983  
 Thermal correction to Gibbs Free Energy= 0.651350

| Atomic Type | Coordinates (Angstroms) |                 |                 |
|-------------|-------------------------|-----------------|-----------------|
|             | X                       | Y               | Z               |
| C           | -5.291255674602         | -0.857548919735 | 0.359346526646  |
| C           | -4.039076332522         | -0.562490614186 | 0.941322923831  |
| C           | -3.284371460804         | 0.529760508979  | 0.474807452764  |
| C           | -3.793070373996         | 1.297805351179  | -0.588166514066 |
| C           | -5.024983367868         | 1.025096499045  | -1.199542153175 |
| C           | -5.764879864929         | -0.063738395282 | -0.704784152585 |
| H           | -5.889768152891         | -1.688502992965 | 0.714201291028  |
| H           | -5.385030755713         | 1.640375218782  | -2.016784688222 |
| H           | -6.726800829746         | -0.300660258364 | -1.150884320622 |
| O           | -3.462260590435         | -1.304281692899 | 1.972964614606  |
| C           | -4.221062524167         | -2.414253814797 | 2.563234500020  |
| H           | -3.579655612224         | -2.810933898740 | 3.351513408542  |
| H           | -5.163081091163         | -2.053817438569 | 2.992570166775  |
| H           | -4.420606409004         | -3.192807178178 | 1.817675676502  |
| O           | -2.990096924542         | 2.359333061779  | -1.042407967980 |

|    |                 |                 |                 |
|----|-----------------|-----------------|-----------------|
| C  | -1.934946655194 | 2.712673089367  | -0.051782909166 |
| H  | -2.360483358607 | 3.499150987115  | 0.579823979500  |
| P  | -1.590925859098 | 1.125153569079  | 0.983992109498  |
| C  | -1.694475541099 | 1.781020905027  | 2.832364431099  |
| C  | -1.386558668492 | 0.607334069181  | 3.793241367500  |
| H  | -2.099086185158 | -0.213145040598 | 3.664695350562  |
| H  | -0.372408394881 | 0.220881744807  | 3.647164740059  |
| H  | -1.457827439583 | 0.971857251678  | 4.827111528581  |
| C  | -3.097065738888 | 2.352460380999  | 3.138268819285  |
| H  | -3.380044059552 | 3.174513250780  | 2.469817722833  |
| H  | -3.869331734375 | 1.578118368023  | 3.075726262122  |
| H  | -3.098423648512 | 2.749511864872  | 4.162778837664  |
| C  | -0.607306411892 | 2.875772384833  | 2.980117961282  |
| H  | -0.823897623478 | 3.767690794015  | 2.379372800190  |
| H  | -0.565055192736 | 3.191316228212  | 4.030972477159  |
| H  | 0.387773844654  | 2.503877098378  | 2.704224269707  |
| C  | -0.733450421057 | 3.258838745663  | -0.776729184582 |
| C  | -0.790466838880 | 4.578681599570  | -1.239096828955 |
| C  | 0.321469317907  | 5.129783262962  | -1.898156893659 |
| H  | -1.692547926231 | 5.158360755095  | -1.081959520235 |
| C  | 1.480800556491  | 3.032339093280  | -1.539773557823 |
| C  | 1.472359941318  | 4.353205760460  | -2.041400922705 |
| H  | 0.296977656693  | 6.146624562414  | -2.275947181131 |
| H  | 2.352111642216  | 4.762221974392  | -2.520041136368 |
| N  | 0.384389194118  | 2.468112331636  | -0.944124825328 |
| Ir | 0.366397751283  | 0.380062188607  | -0.385692351361 |
| O  | 2.591776222161  | 2.232605183485  | -1.599602439379 |
| C  | 3.794353923907  | 2.714878774256  | -2.302549975829 |
| H  | 4.216329750448  | 3.588601605992  | -1.794043994748 |
| H  | 4.493725315338  | 1.880607417226  | -2.256118396043 |
| H  | 3.562517250668  | 2.949457638223  | -3.346845287590 |
| C  | -1.632420702773 | -3.593955986191 | -3.423449433555 |
| C  | -0.244681617778 | -3.361724516689 | -3.369647052208 |
| C  | 0.308210133835  | -2.818642437673 | -2.205013194701 |
| C  | -0.501867181407 | -2.461026330064 | -1.098271862614 |
| C  | -1.877661951005 | -2.712641188988 | -1.130683043931 |
| C  | -2.440097068714 | -3.285325486369 | -2.301087920867 |
| H  | -2.084482283470 | -4.026490324590 | -4.310716989655 |
| H  | 0.382103288975  | -3.624881903158 | -4.217314995107 |
| H  | -2.510276356506 | -2.476663381334 | -0.282792830218 |
| C  | 0.330325573692  | -1.841999481788 | 0.001307504471  |
| C  | 0.009268859347  | -2.251986797323 | 1.451112745085  |
| C  | 1.706525753469  | -2.179722647321 | -0.407815387000 |
| C  | 1.160105773629  | -1.855653570112 | 2.397249794839  |
| H  | -0.927707146755 | -1.802171745181 | 1.789310968487  |
| C  | 2.531097770445  | -2.366104052120 | 1.920822271804  |
| H  | 1.192939472224  | -0.767485944385 | 2.498553645126  |
| H  | 2.673177952288  | -3.417885944889 | 2.204868820653  |
| C  | 1.772096416942  | -2.580977529669 | -1.882494281130 |
| H  | 2.362714727348  | -3.495906208578 | -2.012926253642 |
| H  | 2.227005826376  | -1.806559098937 | -2.510366594172 |
| H  | 3.335867791068  | -1.787224109270 | 2.383558038811  |
| H  | 0.984075760348  | -2.265059217567 | 3.399421127000  |
| H  | -0.129507552743 | -3.345783892311 | 1.489495250706  |
| N  | 2.726039421898  | -2.315805714434 | 0.432861895977  |
| C  | -3.850564533653 | -3.567112138615 | -2.353788170265 |
| N  | -5.009583655801 | -3.803842773614 | -2.398965463651 |
| C  | 4.121309351860  | -2.610982636689 | -0.014997773436 |
| H  | 4.132916977826  | -2.644392223993 | -1.105821471259 |
| H  | 4.388186309232  | -3.608029936000 | 0.355554367526  |
| C  | 5.133590899792  | -1.584922498549 | 0.482003753051  |

|   |                 |                 |                 |
|---|-----------------|-----------------|-----------------|
| C | 5.001343313469  | -0.219742297426 | 0.141730253679  |
| C | 6.235198840481  | -1.996694626316 | 1.259741185035  |
| C | 5.955215097408  | 0.717025192058  | 0.578193175475  |
| H | 4.156803839569  | 0.109402748861  | -0.460171913849 |
| C | 7.195798673521  | -1.060409134179 | 1.691939918301  |
| H | 6.345920037098  | -3.045186305226 | 1.528603047994  |
| C | 7.056817469916  | 0.299296345666  | 1.353815576966  |
| H | 5.845694614396  | 1.766426978870  | 0.316401155616  |
| H | 8.042046494125  | -1.389635123343 | 2.289281802973  |
| H | 7.794976838082  | 1.023603835659  | 1.688374278176  |
| H | 1.393577417258  | 0.105277274943  | -1.575048122907 |
| H | 2.009406143363  | 0.673199580026  | 0.454860668613  |
| H | 1.512953924501  | 0.739995836172  | 1.092249221157  |
| H | -0.721094418059 | 0.120594135555  | -1.502990729557 |

D

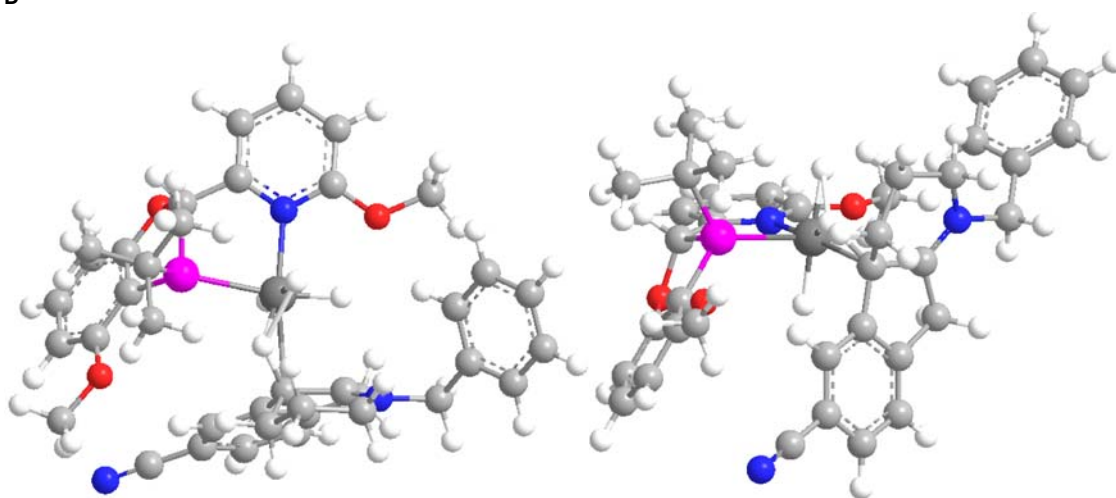

SCF Done: E(RB3LYP) = -1975.15880201  
 Temperature 298.150 Kelvin. Pressure 1.00000 Atm.  
 Zero-point correction= 0.739599 (Hartree/Particle)  
 Thermal correction to Energy= 0.783946  
 Thermal correction to Enthalpy= 0.784890  
 Thermal correction to Gibbs Free Energy= 0.661670  
 Sum of electronic and zero-point Energies= -1974.419203  
 Sum of electronic and thermal Energies= -1974.374856  
 Sum of electronic and thermal Enthalpies= -1974.373912  
 Sum of electronic and thermal Free Energies= -1974.497132

Temperature 323.150 Kelvin. Pressure 1.00000 Atm.  
 Zero-point correction= 0.739599 (Hartree/Particle)  
 Thermal correction to Energy= 0.791143  
 Thermal correction to Enthalpy= 0.792167  
 Thermal correction to Gibbs Free Energy= 0.651045

| Atomic Type | Coordinates (Angstroms) |                 |                 |
|-------------|-------------------------|-----------------|-----------------|
|             | X                       | Y               | Z               |
| C           | 5.446261010190          | 0.373118795751  | 0.473524843938  |
| C           | 4.207919114916          | 0.184504407526  | 1.125337649380  |
| C           | 3.325497227205          | -0.817839058249 | 0.681567382452  |
| C           | 3.702912191283          | -1.616415098322 | -0.413469003302 |
| C           | 4.918614341288          | -1.449374749029 | -1.090522371340 |
| C           | 5.781862436990          | -0.439748906582 | -0.627427868944 |

|    |                 |                 |                 |
|----|-----------------|-----------------|-----------------|
| H  | 6.139660218949  | 1.137647738508  | 0.803942020300  |
| H  | 5.176337645299  | -2.084722637557 | -1.930768208119 |
| H  | 6.735021564628  | -0.284603964216 | -1.125412152723 |
| O  | 3.776307299423  | 0.946153763116  | 2.213482069027  |
| C  | 4.721172467202  | 1.879114958079  | 2.844989688732  |
| H  | 4.183231392692  | 2.295067060915  | 3.698191166944  |
| H  | 5.615634313332  | 1.346721254567  | 3.188337770862  |
| H  | 5.002685835652  | 2.680826536221  | 2.153172942123  |
| O  | 2.787672496444  | -2.603634445066 | -0.823211388116 |
| C  | 1.744194110218  | -2.857651278906 | 0.213445993018  |
| H  | 2.105306299275  | -3.698115888312 | 0.814826692602  |
| P  | 1.615531103469  | -1.269659848807 | 1.270444421808  |
| C  | 1.720351408599  | -1.893974423497 | 3.119936676891  |
| C  | 1.448357772351  | -0.682280760661 | 4.044509758449  |
| H  | 2.184821392600  | 0.112269334752  | 3.887528121179  |
| H  | 0.442923925189  | -0.274195441772 | 3.882698921139  |
| H  | 1.509796764957  | -1.012776234950 | 5.090226061120  |
| C  | 3.111062439064  | -2.496295082468 | 3.418717560092  |
| H  | 3.364267501273  | -3.325738649398 | 2.746647472672  |
| H  | 3.900255322681  | -1.740640760128 | 3.345543928969  |
| H  | 3.112131079533  | -2.891008866261 | 4.443949954950  |
| C  | 0.606872498316  | -2.955407262530 | 3.310355944302  |
| H  | 0.807387059513  | -3.877564344079 | 2.750450468454  |
| H  | 0.556784011116  | -3.223664466599 | 4.373916670153  |
| H  | -0.374840119821 | -2.569551058049 | 3.010508525420  |
| C  | 0.469803756055  | -3.251823176776 | -0.486623906879 |
| C  | 0.412169824274  | -4.548390002040 | -1.006487689705 |
| C  | -0.727871596431 | -4.967006997953 | -1.711039702657 |
| H  | 1.256553706609  | -5.211845452422 | -0.862389437267 |
| C  | -1.682592601793 | -2.771074120143 | -1.311877182975 |
| C  | -1.780338201993 | -4.068026427155 | -1.866768006982 |
| H  | -0.793238846437 | -5.967500274996 | -2.125336842983 |
| H  | -2.673429436023 | -4.361626692526 | -2.401253013697 |
| N  | -0.572859765636 | -2.351154772171 | -0.619405282274 |
| Ir | -0.449477795646 | -0.396893655463 | 0.234585367386  |
| O  | -2.697568916307 | -1.864131080534 | -1.439943695364 |
| C  | -3.881972312263 | -2.200930380100 | -2.252850631463 |
| H  | -4.434357239279 | -3.033350412833 | -1.804020007405 |
| H  | -4.489745079380 | -1.297145818997 | -2.234767793303 |
| H  | -3.589284815433 | -2.436960926388 | -3.281349821908 |
| C  | 2.023590620475  | 3.833237653267  | -2.131844883092 |
| C  | 0.660578007261  | 3.563465016887  | -2.357035902175 |
| C  | -0.083758305804 | 2.945486894585  | -1.347496922541 |
| C  | 0.519313539557  | 2.563127159599  | -0.126238936810 |
| C  | 1.866199494124  | 2.837273769505  | 0.120138329531  |
| C  | 2.618357750294  | 3.481955599274  | -0.895369132171 |
| H  | 2.619233183916  | 4.323885657528  | -2.895346459448 |
| H  | 0.198276924471  | 3.850096512663  | -3.297070093885 |
| H  | 2.339828053817  | 2.551438196905  | 1.053600558638  |
| C  | -0.498253321002 | 1.939325782525  | 0.799324960075  |
| C  | -0.528671492547 | 2.510206586411  | 2.250094364630  |
| C  | -1.799197781659 | 2.181406637316  | 0.096377713252  |
| C  | -1.780058869361 | 1.998156307652  | 2.985695667393  |
| H  | 0.378110669011  | 2.230706808521  | 2.795833922228  |
| C  | -3.079484927046 | 2.317454002463  | 2.226094150814  |
| H  | -1.701833863074 | 0.916319151071  | 3.135118535715  |
| H  | -3.435932256673 | 3.327176416973  | 2.468547619001  |
| C  | -1.565050725331 | 2.617883365614  | -1.349784508461 |
| H  | -2.173828816223 | 3.494187177111  | -1.599268445773 |
| H  | -1.812798462790 | 1.827036855661  | -2.066361972889 |
| H  | -3.866449919907 | 1.612319086862  | 2.503426904393  |

|   |                 |                 |                 |
|---|-----------------|-----------------|-----------------|
| H | -1.847983887283 | 2.459900544121  | 3.976538090281  |
| H | -0.541010933538 | 3.606582142491  | 2.177437441241  |
| N | -2.952476988077 | 2.297381745388  | 0.726966926500  |
| C | 4.002642903739  | 3.799078390137  | -0.663479948997 |
| N | 5.138558480240  | 4.062400453822  | -0.461233317513 |
| C | -4.234586355646 | 2.570933570023  | -0.002921737560 |
| H | -4.039774019895 | 2.478219633299  | -1.072987997252 |
| H | -4.519747847065 | 3.609433091920  | 0.203197676097  |
| C | -5.361875812759 | 1.628496306058  | 0.398236740984  |
| C | -5.188773791465 | 0.227554979280  | 0.336784239603  |
| C | -6.609094343013 | 2.155161425578  | 0.790494734944  |
| C | -6.251547393549 | -0.631709013406 | 0.668446804614  |
| H | -4.227939666402 | -0.189263656349 | 0.042889453783  |
| C | -7.676815418974 | 1.294363686827  | 1.114253441362  |
| H | -6.750127740970 | 3.232566063980  | 0.844634949659  |
| C | -7.499975171702 | -0.101346391623 | 1.055463517144  |
| H | -6.109529707654 | -1.708615394895 | 0.625349617507  |
| H | -8.635253657238 | 1.710375623731  | 1.413587168512  |
| H | -8.321096935536 | -0.766869585492 | 1.308914296105  |
| H | -1.791398087798 | -0.075766533769 | -0.558661246971 |
| H | -1.492133842943 | -0.915120029133 | 1.451979719026  |
| H | -0.379453559506 | 0.628347394012  | 1.484693488081  |
| H | 0.429111731386  | -0.008608777893 | -1.135737190531 |

E

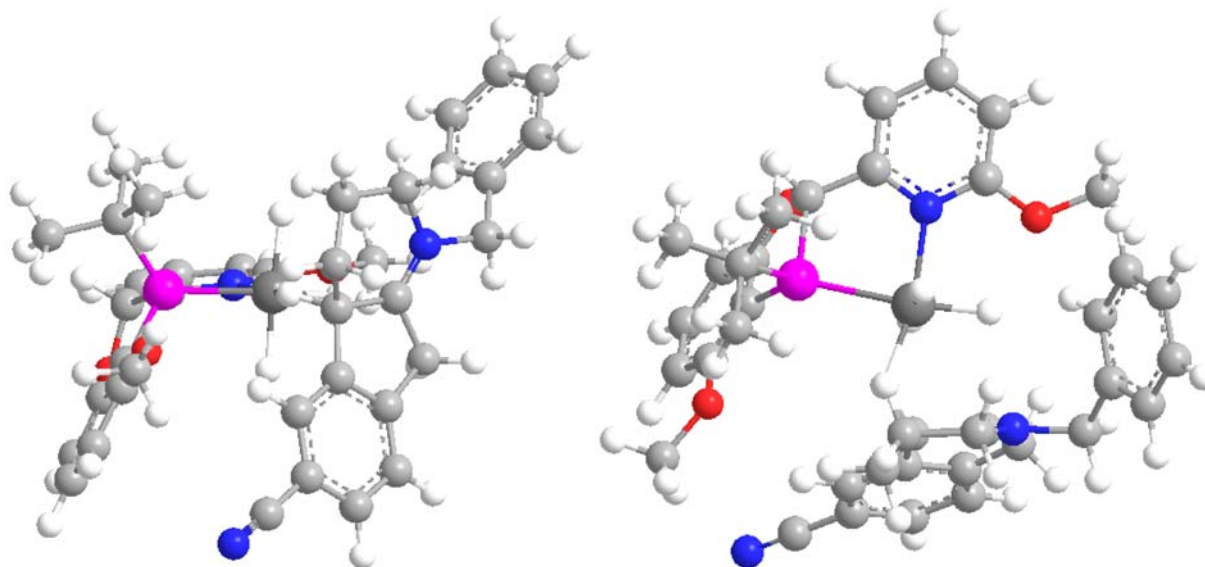

SCF Done: E(RB3LYP) = -1975.16624100

Temperature 298.150 Kelvin. Pressure 1.00000 Atm.  
 Zero-point correction= 0.742301 (Hartree/Particle)  
 Thermal correction to Energy= 0.787163  
 Thermal correction to Enthalpy= 0.788107  
 Thermal correction to Gibbs Free Energy= 0.662211  
 Sum of electronic and zero-point Energies= -1974.423940  
 Sum of electronic and thermal Energies= -1974.379078  
 Sum of electronic and thermal Enthalpies= -1974.378134  
 Sum of electronic and thermal Free Energies= -1974.504030

Temperature 323.150 Kelvin. Pressure 1.00000 Atm.  
 Zero-point correction= 0.742301 (Hartree/Particle)  
 Thermal correction to Energy= 0.794377  
 Thermal correction to Enthalpy= 0.795400  
 Thermal correction to Gibbs Free Energy= 0.651361

| Atomic Type | Coordinates (Angstroms) |                 |                 |
|-------------|-------------------------|-----------------|-----------------|
|             | X                       | Y               | Z               |
| C           | -5.417130668596         | -0.515221127798 | -0.112810213524 |
| C           | -4.207176203196         | -0.330272962494 | 0.591988286072  |
| C           | -3.375778716440         | 0.764255106828  | 0.289168795309  |
| C           | -3.770314678620         | 1.650987795255  | -0.728867207391 |
| C           | -4.959664107231         | 1.493251548605  | -1.454412336738 |
| C           | -5.775198442589         | 0.395064433466  | -1.127415679599 |
| H           | -6.072919834591         | -1.348218650813 | 0.112816842606  |
| H           | -5.231477167156         | 2.199226465940  | -2.231502979811 |
| H           | -6.706346617481         | 0.243846300412  | -1.666630972310 |
| O           | -3.755794067918         | -1.188010511033 | 1.598378191731  |
| C           | -4.665606616304         | -2.224916625703 | 2.104508090995  |
| H           | -4.127632626148         | -2.701134272396 | 2.925655862136  |
| H           | -5.594523588488         | -1.776061229124 | 2.474768582423  |
| H           | -4.892093376816         | -2.964830159739 | 1.327969307769  |
| O           | -2.899386257379         | 2.716172151313  | -1.018147173599 |
| C           | -1.852027367057         | 2.893455741974  | 0.030950064575  |
| H           | -2.213395441741         | 3.685095939094  | 0.694666853072  |
| P           | -1.699309735392         | 1.228928697536  | 0.960598872961  |
| C           | -1.887878725075         | 1.708635726573  | 2.847011275455  |
| C           | -1.674223954591         | 0.427085069015  | 3.689198498771  |
| H           | -2.409751498002         | -0.344139442044 | 3.439828720034  |
| H           | -0.667951389070         | 0.016645663351  | 3.541608253839  |
| H           | -1.779135839371         | 0.679850776343  | 4.753171855330  |
| C           | -3.283316672417         | 2.309120439290  | 3.125434786322  |
| H           | -3.483779222708         | 3.202496181076  | 2.520673589076  |
| H           | -4.080908491394         | 1.581974934639  | 2.938081457919  |
| H           | -3.336562233287         | 2.607840348398  | 4.181387880835  |
| C           | -0.770504380932         | 2.733185612657  | 3.168429331623  |
| H           | -0.927863181969         | 3.696096545312  | 2.666196374611  |
| H           | -0.768555515440         | 2.925066012474  | 4.249663347555  |
| H           | 0.218212136802          | 2.349810422248  | 2.888619091354  |
| C           | -0.581262983480         | 3.350915453037  | -0.639472481965 |
| C           | -0.531396786233         | 4.688952510891  | -1.040165267318 |
| C           | 0.597990815346          | 5.179111586849  | -1.713501614991 |
| H           | -1.379149878734         | 5.330075872362  | -0.829321736183 |
| C           | 1.574131187799          | 2.961945952231  | -1.519456961330 |
| C           | 1.654188209529          | 4.303792461209  | -1.954613005435 |
| H           | 0.653128218100          | 6.212786747949  | -2.037682734897 |
| H           | 2.541845981704          | 4.650241437089  | -2.465947527440 |
| N           | 0.467932425255          | 2.467984208910  | -0.861599791570 |
| Ir          | 0.344670952166          | 0.506114390958  | -0.220073940694 |
| O           | 2.602166186008          | 2.085458581184  | -1.730199971469 |
| C           | 3.779809581791          | 2.513222673552  | -2.508887670548 |
| H           | 4.316855287398          | 3.314237375628  | -1.989710299136 |
| H           | 4.404281134138          | 1.622300234261  | -2.567418920579 |
| H           | 3.483629517307          | 2.830984139531  | -3.514207604182 |
| C           | -1.762132993411         | -3.977785519887 | -2.935229928255 |
| C           | -0.406041058314         | -3.618769958073 | -3.028710165219 |
| C           | 0.217766246153          | -3.032050488383 | -1.919654485624 |
| C           | -0.501253514028         | -2.798163461036 | -0.729956829452 |
| C           | -1.849086809155         | -3.144150914364 | -0.618759735245 |

|   |                 |                 |                 |
|---|-----------------|-----------------|-----------------|
| C | -2.480699462610 | -3.744105436009 | -1.735662119555 |
| H | -2.265405819221 | -4.437105348057 | -3.780342702185 |
| H | 0.141468341419  | -3.799174448355 | -3.948778642714 |
| H | -2.409374321359 | -2.944470990527 | 0.288799283813  |
| C | 0.375220337163  | -2.143493240434 | 0.317841587844  |
| C | 0.418391920475  | -2.780267899333 | 1.733484106311  |
| C | 1.752931387059  | -2.177677964714 | -0.321672684786 |
| C | 1.507312096297  | -2.065517345913 | 2.550431973974  |
| H | -0.555343961356 | -2.682182519318 | 2.222822019731  |
| C | 2.892353539117  | -2.144594544917 | 1.884746523206  |
| H | 1.228472256745  | -1.014106109855 | 2.673300576742  |
| H | 3.425043598846  | -3.056355249550 | 2.182012645960  |
| C | 1.659539293826  | -2.578588471285 | -1.792303940525 |
| H | 2.363475507211  | -3.383298964699 | -2.032270698059 |
| H | 1.884447799649  | -1.733881348200 | -2.453816173985 |
| H | 3.506105095537  | -1.289460727960 | 2.177325700087  |
| H | 1.586660670281  | -2.508966475815 | 3.548602278460  |
| H | 0.634174895189  | -3.851609687908 | 1.627810739516  |
| N | 2.860355716444  | -2.184991040004 | 0.380757868029  |
| C | -3.867663963988 | -4.119267698582 | -1.653338627823 |
| N | -5.007664222235 | -4.426395812178 | -1.576755413514 |
| C | 4.210981001329  | -2.347366418245 | -0.268868021477 |
| H | 4.080228893174  | -2.216443760818 | -1.344014773527 |
| H | 4.535653896004  | -3.377779534084 | -0.083448272933 |
| C | 5.249190133832  | -1.363705909118 | 0.248915454452  |
| C | 5.050715041538  | 0.029242228945  | 0.117648668031  |
| C | 6.444420020344  | -1.843348878711 | 0.821727761497  |
| C | 6.037708641103  | 0.927489534883  | 0.560877267054  |
| H | 4.129328438656  | 0.409560134558  | -0.317702863856 |
| C | 7.437195531320  | -0.943374266657 | 1.257369504831  |
| H | 6.603992903340  | -2.914360221274 | 0.927058428000  |
| C | 7.234913617717  | 0.444258202729  | 1.129340628889  |
| H | 5.877412294986  | 1.998130474850  | 0.463085907779  |
| H | 8.357113470358  | -1.322622119159 | 1.694362492739  |
| H | 7.998055679831  | 1.140353783988  | 1.467649069543  |
| H | 1.634011678215  | 0.221348429683  | -1.107440212222 |
| H | 1.362837808895  | 0.825132354831  | 1.094016796574  |
| H | -0.054108931663 | -1.095179263940 | 0.603406551899  |
| H | -0.587281062209 | 0.144584336601  | -1.573174665668 |

-----



F

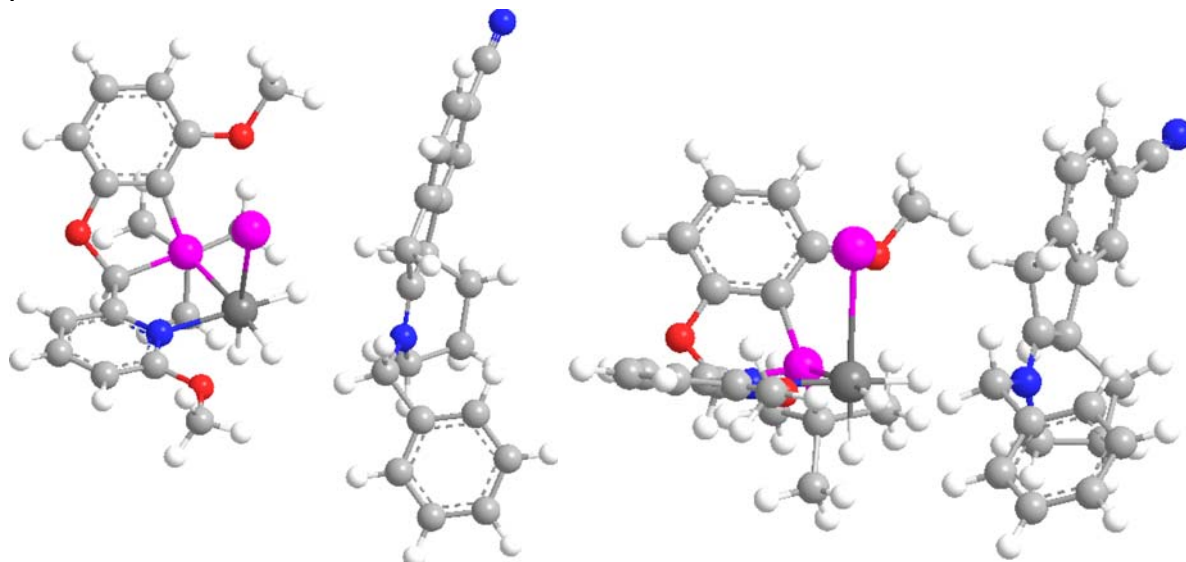

SCF Done: E(RB3LYP) = -1986.804797 A.U.

Temperature 298.150 Kelvin. Pressure 1.00000 Atm.

Zero-point correction= 0.744093 (Hartree/Particle)  
 Thermal correction to Energy= 0.791857  
 Thermal correction to Enthalpy= 0.792801  
 Thermal correction to Gibbs Free Energy= 0.654503  
 Sum of electronic and zero-point Energies= -1986.060704  
 Sum of electronic and thermal Energies= -1986.012939  
 Sum of electronic and thermal Enthalpies= -1986.011995  
 Sum of electronic and thermal Free Energies= -1986.150294

Temperature 323.150 Kelvin. Pressure 1.00000 Atm.

Zero-point correction= 0.744093 (Hartree/Particle)  
 Thermal correction to Energy= 0.799303  
 Thermal correction to Enthalpy= 0.800326  
 Thermal correction to Gibbs Free Energy= 0.642603

Atomic Coordinates (Angstroms)  
 Type X Y Z

| Atomic Type | X               | Y               | Z               |
|-------------|-----------------|-----------------|-----------------|
| C           | -2.430102087318 | -5.389664079541 | 0.771080699480  |
| C           | -2.744106455106 | -4.135997033277 | 1.324202632651  |
| C           | -2.843619099820 | -3.023957414676 | 0.475923576573  |
| C           | -2.625453138627 | -3.152498750779 | -0.915076664765 |
| C           | -2.308170394139 | -4.390991149537 | -1.478431792409 |
| C           | -2.213819347065 | -5.518860249730 | -0.623923745389 |
| H           | -2.350623524060 | -6.264519086929 | 1.409082663699  |
| H           | -2.905875641298 | -4.039353708983 | 2.393602081814  |
| H           | -2.134704695182 | -4.501216141375 | -2.544569547926 |
| C           | -2.768731654429 | -1.811323626312 | -1.614226859499 |
| C           | -3.746214521211 | -1.738057408762 | -2.831682622349 |
| C           | -3.214819303738 | -0.902457242936 | -0.489106175789 |
| C           | -4.218022560026 | -0.276370567639 | -3.103008557354 |
| H           | -3.235661880577 | -2.150327073662 | -3.707211945396 |
| C           | -3.535499816754 | 0.762488783902  | -2.182724806790 |
| H           | -5.302415945264 | -0.205119734548 | -2.965227322506 |

|   |                 |                 |                 |
|---|-----------------|-----------------|-----------------|
| H | -4.029418438988 | 1.732108358607  | -2.254744573834 |
| C | -3.151962363835 | -1.586264434316 | 0.853319940196  |
| H | -4.072237575860 | -1.475034573179 | 1.439388210130  |
| H | -2.330159151119 | -1.145577833101 | 1.451015757290  |
| H | -2.476375238661 | 0.888654033700  | -2.435706763134 |
| H | -4.001127792652 | 0.011635489449  | -4.137024492804 |
| H | -4.610442389224 | -2.378419926095 | -2.625577895374 |
| N | -3.593802153333 | 0.317311682138  | -0.753114043599 |
| C | -1.893296401252 | -6.808755872725 | -1.175382478418 |
| N | -1.630016107164 | -7.869552868270 | -1.629008644472 |
| C | -3.967317905769 | 1.325006851453  | 0.291128018609  |
| H | -3.162410824799 | 2.068882688809  | 0.292078063916  |
| H | -3.953116534850 | 0.819844769124  | 1.259990329607  |
| C | -5.318128328237 | 1.972725615671  | 0.028003883171  |
| C | -6.497954761161 | 1.196631842085  | -0.021631167424 |
| C | -5.406261137678 | 3.371224516157  | -0.133728950321 |
| C | -7.745158903877 | 1.811055438594  | -0.234246639549 |
| H | -6.447719646615 | 0.117529613292  | 0.107574367236  |
| C | -6.655520809774 | 3.989166518016  | -0.339989686815 |
| H | -4.503407073514 | 3.977184131715  | -0.097749722219 |
| C | -7.827456705246 | 3.210163280797  | -0.392990628898 |
| H | -8.647323596366 | 1.205939227647  | -0.271989366991 |
| H | -6.712062307991 | 5.067706663711  | -0.461182729172 |
| H | -8.791882911756 | 3.684828603807  | -0.554637011122 |
| H | -1.784764249564 | -1.447093413413 | -1.954649135309 |
| C | 4.769565670977  | -2.335056482165 | 0.629282808822  |
| C | 3.775881039238  | -1.633524553440 | -0.091085430110 |
| C | 3.832079083353  | -0.229424734246 | -0.186837168466 |
| C | 4.897229988101  | 0.445309598871  | 0.432560135339  |
| C | 5.906618826588  | -0.218176261889 | 1.148096875579  |
| C | 5.820579497064  | -1.618686732807 | 1.237840648817  |
| H | 4.737284248361  | -3.414910953967 | 0.719292668246  |
| H | 6.713253759140  | 0.338902139404  | 1.612504293882  |
| H | 6.581194503377  | -2.165089889427 | 1.789694083456  |
| O | 2.716999050155  | -2.252424223979 | -0.754670370205 |
| C | 2.561246101687  | -3.704222031321 | -0.638065486452 |
| H | 2.422483551468  | -3.999683618868 | 0.408961668500  |
| H | 1.665385056834  | -3.943641954720 | -1.213097012741 |
| H | 3.426621548194  | -4.226981513916 | -1.063792512360 |
| O | 4.941914072451  | 1.842736093463  | 0.287048265927  |
| C | 3.689986799882  | 2.395694334827  | -0.293883178226 |
| P | 2.647671507989  | 0.953524758122  | -1.026778173929 |
| C | 3.190569079449  | 0.905921018108  | -2.910170019137 |
| C | 2.458958822817  | -0.293041631029 | -3.565141585563 |
| H | 2.748312304662  | -0.357186451042 | -4.623826572494 |
| H | 2.717653251400  | -1.239172615680 | -3.076592709389 |
| H | 1.370042880385  | -0.169167423434 | -3.516010171085 |
| C | 4.720507315048  | 0.738202756963  | -3.059550010774 |
| H | 4.978352221560  | 0.754211213291  | -4.128135956612 |
| H | 5.276839047753  | 1.548606179068  | -2.571857087515 |
| H | 5.067426055799  | -0.214137894366 | -2.643102084876 |
| C | 2.734945488273  | 2.223265203617  | -3.584421371124 |
| H | 1.663565140167  | 2.399993562127  | -3.439393898690 |
| H | 3.281325967545  | 3.096113311775  | -3.203641774183 |
| H | 2.933495791615  | 2.156840744047  | -4.663354262005 |
| C | 2.956147757801  | 3.195330331528  | 0.775916873516  |
| C | 3.734939355673  | 4.018897126332  | 1.605845957566  |
| C | 3.104811351940  | 4.816501864425  | 2.571556300579  |
| H | 4.811469980075  | 4.017102242874  | 1.488872787158  |
| C | 0.982306307726  | 3.943006299125  | 1.797638965902  |
| C | 1.709779931012  | 4.787145690829  | 2.664897870171  |

|    |                 |                 |                 |
|----|-----------------|-----------------|-----------------|
| H  | 3.684245360698  | 5.456174931559  | 3.230169543437  |
| N  | 1.583577620505  | 3.126605637866  | 0.875104604645  |
| Ir | 0.429743488285  | 1.617052499708  | -0.330134597140 |
| O  | -0.391445907083 | 3.895046543384  | 1.817357285924  |
| C  | -1.126116877549 | 4.698099406896  | 2.802216795346  |
| H  | -0.945104776812 | 5.769370660713  | 2.652924366869  |
| H  | -0.858749682425 | 4.405526722415  | 3.824375691122  |
| H  | -2.176262217983 | 4.471254784554  | 2.614623141956  |
| H  | -1.004219858276 | 2.241666319826  | 0.056501809634  |
| H  | 0.338857180299  | 2.567297220057  | -1.599367516229 |
| I  | 0.305209333403  | -0.141740103289 | 2.139507595471  |
| H  | -0.391705316987 | 0.537136687397  | -1.194183872214 |
| H  | 1.197920977125  | 5.404873371865  | 3.391015992749  |
| H  | 4.008364675139  | 3.074533705663  | -1.091278853839 |

G

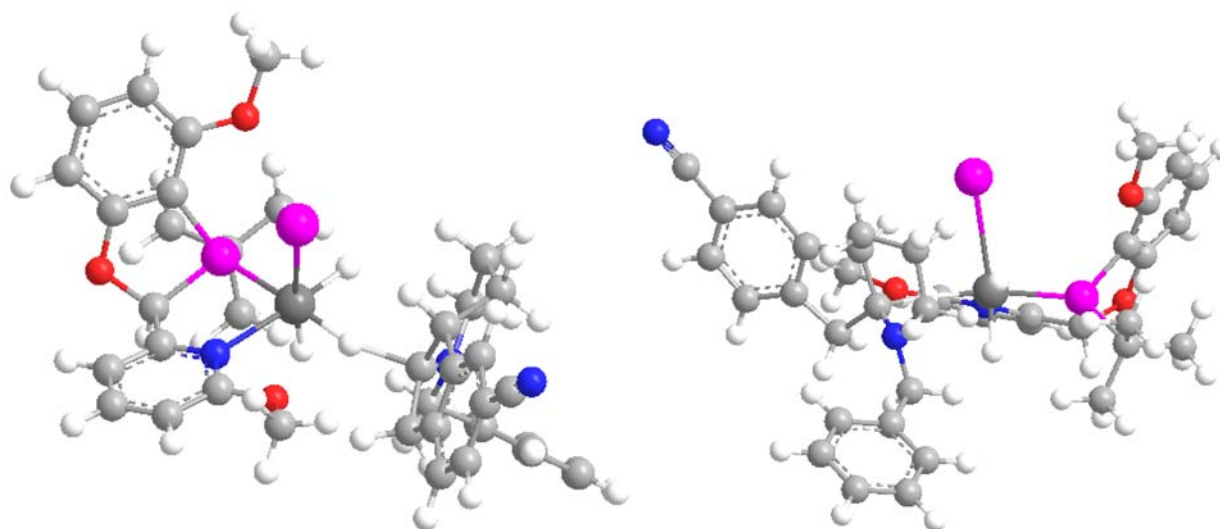

SCF Done: E(RB3LYP) = -1986.79514445 A.U.  
 Temperature 298.150 Kelvin. Pressure 1.00000 Atm.  
 Zero-point correction= 0.743419 (Hartree/Particle)  
 Thermal correction to Energy= 0.790205  
 Thermal correction to Enthalpy= 0.791149  
 Thermal correction to Gibbs Free Energy= 0.656798  
 Sum of electronic and zero-point Energies= -1986.051725  
 Sum of electronic and thermal Energies= -1986.004940  
 Sum of electronic and thermal Enthalpies= -1986.003996  
 Sum of electronic and thermal Free Energies= -1986.138347

Temperature 323.150 Kelvin. Pressure 1.00000 Atm.

Zero-point correction= 0.743419 (Hartree/Particle)  
 Thermal correction to Energy= 0.797571  
 Thermal correction to Enthalpy= 0.798594  
 Thermal correction to Gibbs Free Energy= 0.645232

| Atomic Type | Coordinates (Angstroms) |   |   |
|-------------|-------------------------|---|---|
|             | X                       | Y | Z |

|   |                 |                 |                 |
|---|-----------------|-----------------|-----------------|
| C | 6.189387135585  | -3.010405112868 | 0.078096383555  |
| C | 5.522249231623  | -2.110784308951 | -0.770766912937 |
| C | 4.585009457397  | -1.219634092777 | -0.223698053035 |
| C | 4.314302196361  | -1.215203088749 | 1.160676539168  |
| C | 4.965358372905  | -2.109833880938 | 2.017240275331  |
| C | 5.910781077865  | -3.012652401915 | 1.468494173191  |
| H | 6.919315746470  | -3.706217483912 | -0.324406708595 |
| H | 5.736089144804  | -2.111087013189 | -1.835856161577 |
| H | 4.760404855885  | -2.120698381600 | 3.083609766646  |
| C | 3.280051764577  | -0.165623993343 | 1.530085936846  |
| C | 3.680369171334  | 0.798492798872  | 2.669129875680  |
| C | 3.070824984268  | 0.588369070135  | 0.195956821191  |
| C | 2.640657394497  | 1.930559964113  | 2.717255728053  |
| H | 3.695211163801  | 0.256543839598  | 3.621367552359  |
| C | 2.617270748548  | 2.724089132843  | 1.396783776638  |
| H | 2.856719938878  | 2.626871620161  | 3.535356268951  |
| H | 3.309230158818  | 3.572241951545  | 1.439886696260  |
| C | 3.759473452208  | -0.177147205561 | -0.954948925456 |
| H | 4.390619236461  | 0.478458992567  | -1.564534856695 |
| H | 3.020498033003  | -0.643086997532 | -1.613291252736 |
| H | 1.608760972182  | 3.117589778948  | 1.211683374245  |
| H | 1.651711841573  | 1.497364643043  | 2.904966404403  |
| H | 4.688460824466  | 1.200107110610  | 2.497758924615  |
| N | 3.004246578580  | 1.927846651219  | 0.193021461255  |
| C | 6.598556912413  | -3.939976203103 | 2.327300408520  |
| N | 7.165154589932  | -4.702485222388 | 3.033198038926  |
| C | 2.908216376733  | 2.698665398137  | -1.075786425936 |
| H | 1.875132603918  | 3.061658961498  | -1.156728669461 |
| H | 3.061621721260  | 2.015843755884  | -1.913785852389 |
| C | 3.886986237186  | 3.864197648308  | -1.157553351627 |
| C | 5.264084887055  | 3.677526078172  | -0.902115783823 |
| C | 3.428560019951  | 5.140802502294  | -1.543636182683 |
| C | 6.165731721220  | 4.749714773095  | -1.031842845470 |
| H | 5.632074843548  | 2.700384165106  | -0.596342437094 |
| C | 4.330048110010  | 6.215374974396  | -1.678938953208 |
| H | 2.369387025768  | 5.297245033047  | -1.737878058365 |
| C | 5.701560814897  | 6.022756703268  | -1.423118418203 |
| H | 7.223088116827  | 4.595144097949  | -0.831543715871 |
| H | 3.964030359121  | 7.194541771079  | -1.977322186513 |
| H | 6.398390801181  | 6.850956068337  | -1.524536939053 |
| H | 2.336221800219  | -0.651716351729 | 1.814813811889  |
| C | -5.606804995274 | -0.516304680874 | 2.077623530958  |
| C | -4.435973569822 | 0.163195252460  | 1.670628921749  |
| C | -4.008865101495 | 0.086332621395  | 0.330949142047  |
| C | -4.781685319653 | -0.645759985904 | -0.586049395272 |
| C | -5.956288092145 | -1.320553776575 | -0.220543679458 |
| C | -6.349651834916 | -1.247097678872 | 1.127835577930  |
| H | -5.945009936821 | -0.479260796744 | 3.106993672919  |
| H | -6.526372902822 | -1.878298869056 | -0.955642866141 |
| H | -7.249551999639 | -1.765522369907 | 1.448546562590  |
| O | -3.660025896408 | 0.951625519208  | 2.515652886870  |
| C | -3.957236543678 | 0.961550380722  | 3.950875987509  |
| H | -3.900857136131 | -0.051813183475 | 4.365771743652  |
| H | -3.184990096761 | 1.589204418851  | 4.398065998413  |
| H | -4.946730936772 | 1.393943348171  | 4.143345022825  |
| O | -4.348131512652 | -0.653316014518 | -1.925218957527 |
| C | -2.964116958413 | -0.134252255266 | -2.070525033166 |
| P | -2.503413739968 | 0.839747059933  | -0.482197235317 |
| C | -3.021782082763 | 2.691406697269  | -0.850967692185 |
| C | -2.685112474696 | 3.522274661809  | 0.412749131509  |
| H | -2.977300511492 | 4.567971234988  | 0.241685981736  |

|    |                 |                 |                 |
|----|-----------------|-----------------|-----------------|
| H  | -3.221255134437 | 3.152385893561  | 1.293855280189  |
| H  | -1.610554050059 | 3.496647958036  | 0.629605227341  |
| C  | -4.532962892115 | 2.787309866149  | -1.165863615856 |
| H  | -4.776490245267 | 3.829301918597  | -1.416208968081 |
| H  | -4.818308616445 | 2.162215150206  | -2.020923517991 |
| H  | -5.146243973631 | 2.494568327367  | -0.306632722852 |
| C  | -2.199287234178 | 3.213175162798  | -2.054250913260 |
| H  | -1.122852803315 | 3.103590837553  | -1.886336181246 |
| H  | -2.457067126798 | 2.699820822584  | -2.989673602585 |
| H  | -2.421487646851 | 4.280149039522  | -2.194208963680 |
| C  | -2.020589270593 | -1.301677088280 | -2.338356480179 |
| C  | -2.475853908348 | -2.306770128128 | -3.206803518529 |
| C  | -1.638215757093 | -3.392174420403 | -3.502136376778 |
| H  | -3.471767760222 | -2.230845667314 | -3.624712127111 |
| C  | 0.038138296282  | -2.385510732990 | -2.074931717337 |
| C  | -0.361978663119 | -3.433210424936 | -2.933260271296 |
| H  | -1.967072068799 | -4.184519738296 | -4.167304279180 |
| N  | -0.774330745897 | -1.335042967685 | -1.752478107032 |
| Ir | -0.223563087094 | 0.244868096388  | -0.203570025685 |
| O  | 1.294349202617  | -2.351710159465 | -1.514112798907 |
| C  | 2.113439949070  | -3.573986705864 | -1.558205045945 |
| H  | 2.443206188652  | -3.788910567227 | -2.581450600611 |
| H  | 1.557711081695  | -4.424439802744 | -1.148016986711 |
| H  | 2.975779117717  | -3.356508969628 | -0.930641248886 |
| H  | 1.443052828915  | 0.055484109018  | -0.162885639643 |
| H  | 0.099347203799  | 1.328851249579  | -1.320175985933 |
| I  | -0.446695476878 | -1.764992200048 | 1.980780822504  |
| H  | 0.069493237697  | 1.383891289236  | 0.871921606270  |
| H  | 0.310164167592  | -4.251181989970 | -3.156412955167 |
| H  | -2.984185603901 | 0.530668013103  | -2.938636244458 |

H

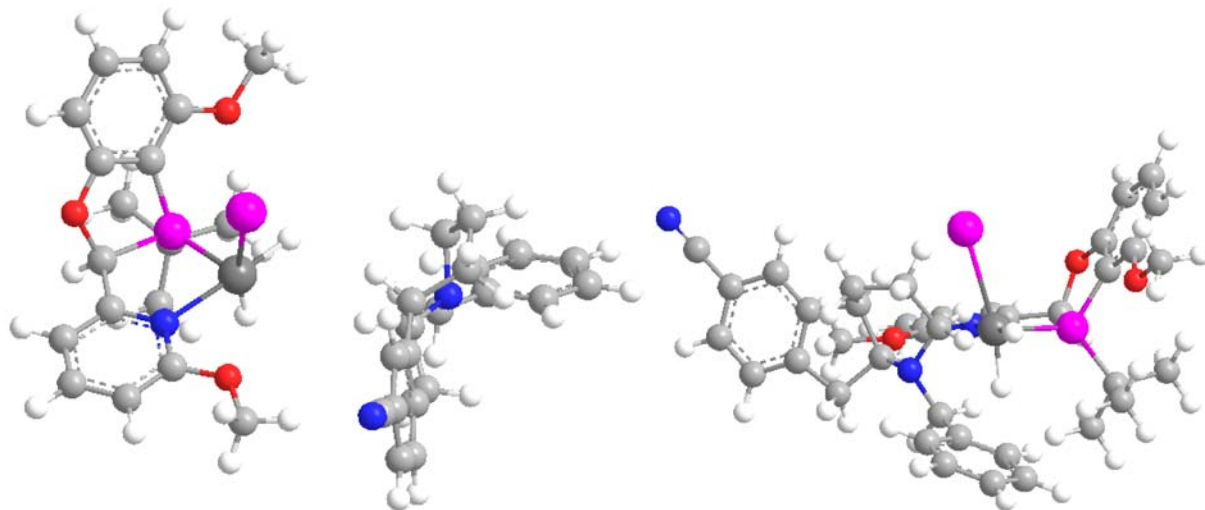

SCF Done: E(RB3LYP) = -1986.81971991 A.U.

Temperature 298.150 Kelvin. Pressure 1.00000 Atm.  
 Zero-point correction= 0.746754 (Hartree/Particle)  
 Thermal correction to Energy= 0.794531  
 Thermal correction to Enthalpy= 0.795476  
 Thermal correction to Gibbs Free Energy= 0.654945

Sum of electronic and zero-point Energies= -1986.072965  
 Sum of electronic and thermal Energies= -1986.025189  
 Sum of electronic and thermal Enthalpies= -1986.024244  
 Sum of electronic and thermal Free Energies= -1986.164775

Temperature 323.150 Kelvin. Pressure 1.00000 Atm.  
 Zero-point correction= 0.746754 (Hartree/Particle)  
 Thermal correction to Energy= 0.801926  
 Thermal correction to Enthalpy= 0.802949  
 Thermal correction to Gibbs Free Energy= 0.642860

| Atomic<br>Type | Coordinates (Angstroms) |                 |                 |
|----------------|-------------------------|-----------------|-----------------|
|                | X                       | Y               | Z               |
| C              | 0.767578670858          | 4.748377840353  | -0.654431918071 |
| C              | 0.690984865798          | 6.084880577617  | -1.085384701819 |
| C              | 0.035882494406          | 7.033144176517  | -0.281007633534 |
| C              | -0.544811722087         | 6.653769101033  | 0.951658613245  |
| C              | -0.475271267978         | 5.327393529152  | 1.392473280086  |
| C              | 0.185550359464          | 4.368272524989  | 0.581541549935  |
| H              | 1.268149279701          | 4.001583024461  | -1.263901558540 |
| H              | 1.135200122018          | 6.372985383531  | -2.034498685531 |
| H              | -0.921562494260         | 5.023944330343  | 2.335523090637  |
| C              | -1.174194985241         | 7.842138531235  | 1.655949948448  |
| C              | -0.363145421235         | 8.322534963935  | 2.884815469721  |
| C              | -1.210043794308         | 8.947919309121  | 0.539093243786  |
| C              | -1.014454020110         | 9.590245081654  | 3.494203057756  |
| H              | -0.308851196425         | 7.523660363481  | 3.636360872325  |
| C              | -1.633868498945         | 10.494004890490 | 2.395372192116  |
| H              | -0.255112717429         | 10.148749665268 | 4.056807939803  |
| H              | -1.542198114078         | 11.546799519128 | 2.681144929075  |
| C              | -0.155871313424         | 8.516276444431  | -0.531060371836 |
| H              | 0.784236288600          | 9.061680529262  | -0.364196669612 |
| H              | -0.477303733166         | 8.724492475468  | -1.558139383308 |
| H              | -2.716740917101         | 10.282383189114 | 2.288234976878  |
| H              | -1.800991009425         | 9.305308825593  | 4.206041336860  |
| H              | 0.665260840624          | 8.544505432736  | 2.572335254219  |
| N              | -0.940396885622         | 10.297272025444 | 1.096199445204  |
| C              | 0.265104207844          | 2.997614925360  | 1.010563849365  |
| N              | 0.330908264362          | 1.869431331532  | 1.363960711688  |
| C              | -1.228860304008         | 11.369802877325 | 0.114806290454  |
| H              | -2.320291832201         | 11.484551738824 | -0.044590629406 |
| H              | -0.806426449259         | 11.055855855957 | -0.849004242690 |
| C              | -0.632086776406         | 12.722176045938 | 0.489262436328  |
| C              | 0.688000412660          | 12.820709038062 | 0.984404365973  |
| C              | -1.374056537574         | 13.907426420907 | 0.297439852729  |
| C              | 1.253068172937          | 14.075707074453 | 1.278475335535  |
| H              | 1.258226027985          | 11.909788987125 | 1.145504814355  |
| C              | -0.810953572074         | 15.167142394750 | 0.586868008908  |
| H              | -2.394894914678         | 13.846846201235 | -0.076048574306 |
| C              | 0.506201766571          | 15.255898004049 | 1.078582946933  |
| H              | 2.269818968909          | 14.135782227748 | 1.660485597288  |
| H              | -1.397191986668         | 16.070421617223 | 0.434222625387  |
| H              | 0.942518006825          | 16.225838276056 | 1.305312624752  |
| H              | -2.193149983211         | 7.603364958804  | 1.989544052736  |
| C              | -9.749557602388         | 10.225069126595 | 2.931942498210  |
| C              | -8.814337312603         | 10.533713586808 | 1.921247329612  |
| C              | -8.756059361084         | 9.740990264738  | 0.757976548221  |
| C              | -9.628475326080         | 8.647346813728  | 0.626434418828  |
| C              | -10.569421458080        | 8.314682282864  | 1.612265924456  |
| C              | -10.610836639279        | 9.120548209014  | 2.763307612514  |

|    |                  |                 |                 |
|----|------------------|-----------------|-----------------|
| H  | -9.815392043562  | 10.823001006552 | 3.833487552388  |
| H  | -11.229343000387 | 7.464239211133  | 1.481874452415  |
| H  | -11.327205023216 | 8.888873795747  | 3.546917647009  |
| O  | -7.917827170091  | 11.593675581539 | 1.975757883848  |
| C  | -7.881841765763  | 12.437877383618 | 3.175835580459  |
| H  | -7.632212288136  | 11.841902237466 | 4.061287660720  |
| H  | -7.095542150660  | 13.169535756332 | 2.985489142615  |
| H  | -8.841327343919  | 12.948408139316 | 3.320666592794  |
| O  | -9.522484044708  | 7.867128488262  | -0.536345908606 |
| C  | -8.572266440844  | 8.419258583367  | -1.540173237277 |
| P  | -7.588690800210  | 9.836455183086  | -0.672093067386 |
| C  | -7.876410278543  | 11.461009665899 | -1.701700406926 |
| C  | -6.983443044183  | 12.578144800816 | -1.110598722646 |
| H  | -7.137790096588  | 13.493580019706 | -1.697669596125 |
| H  | -7.238051949266  | 12.784829659900 | -0.066519343675 |
| H  | -5.922514265606  | 12.309866248227 | -1.164902939196 |
| C  | -9.370294649463  | 11.853422266203 | -1.617157516261 |
| H  | -9.527321913425  | 12.751940978212 | -2.228482532453 |
| H  | -10.034629208958 | 11.070639685363 | -2.004898506748 |
| H  | -9.670734828819  | 12.084947908090 | -0.589784834738 |
| C  | -7.466095908759  | 11.174581302500 | -3.167722683461 |
| H  | -6.426529565994  | 10.835286784096 | -3.238382425981 |
| H  | -8.111906151787  | 10.428820869265 | -3.647574227200 |
| H  | -7.558194914525  | 12.106589901687 | -3.740412930712 |
| C  | -7.675323207040  | 7.306969275748  | -2.038767058368 |
| C  | -8.213069785123  | 6.287879594420  | -2.836779214070 |
| C  | -7.372241520592  | 5.248343074141  | -3.276661368756 |
| H  | -9.264215654206  | 6.307402374759  | -3.100395020780 |
| C  | -5.538860875991  | 6.331100011087  | -2.140266835180 |
| C  | -6.015611658194  | 5.263898981067  | -2.929659085896 |
| H  | -7.766396604928  | 4.442540076453  | -3.887670401544 |
| N  | -6.349826050815  | 7.321974379521  | -1.686456112506 |
| Ir | -5.532209493577  | 8.924160223633  | -0.416240569171 |
| O  | -4.229077063562  | 6.490158531688  | -1.762336380867 |
| C  | -3.245276624352  | 5.446074327554  | -2.093102795399 |
| H  | -3.126113030091  | 5.361790748297  | -3.179134300751 |
| H  | -3.546339874352  | 4.485006106155  | -1.661831069928 |
| H  | -2.314826475751  | 5.785227086928  | -1.638994123653 |
| H  | -2.218797480178  | 8.921489483900  | 0.073294298818  |
| H  | -5.139016687772  | 9.817571877847  | -1.671696984204 |
| I  | -5.593698503973  | 7.261573352958  | 1.934839027628  |
| H  | -4.981805787020  | 10.121738337868 | 0.489673800199  |
| H  | -5.349178354836  | 4.480430871124  | -3.267420051201 |
| H  | -9.185229113369  | 8.810976515017  | -2.357481822943 |

-----

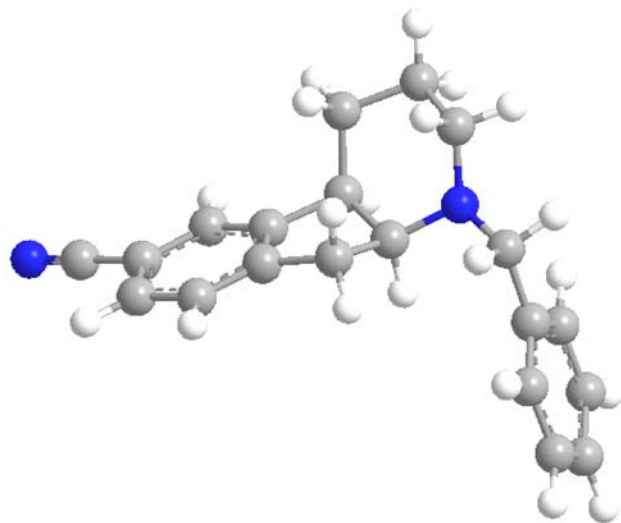

SCF Done: E(RB3LYP) = -883.526510298 A.U.

Temperature 298.150 Kelvin. Pressure 1.00000 Atm.  
 Zero-point correction= 0.356383 (Hartree/Particle)  
 Thermal correction to Energy= 0.374055  
 Thermal correction to Enthalpy= 0.374999  
 Thermal correction to Gibbs Free Energy= 0.309080  
 Sum of electronic and zero-point Energies= -883.170127  
 Sum of electronic and thermal Energies= -883.152456  
 Sum of electronic and thermal Enthalpies= -883.151511  
 Sum of electronic and thermal Free Energies= -883.217430

Temperature 323.150 Kelvin. Pressure 1.00000 Atm.  
 Zero-point correction= 0.356383 (Hartree/Particle)  
 Thermal correction to Energy= 0.377026  
 Thermal correction to Enthalpy= 0.378050  
 Thermal correction to Gibbs Free Energy= 0.303430

| Atomic Type | Coordinates (Angstroms) |                 |                 |
|-------------|-------------------------|-----------------|-----------------|
|             | X                       | Y               | Z               |
| C           | -3.590073182202         | 2.219940823669  | -0.193165358468 |
| C           | -2.316533905198         | 2.195917393160  | -0.791566860134 |
| C           | -1.537994113259         | 1.030648102662  | -0.708431007392 |
| C           | -2.024440253966         | -0.112676871394 | -0.023914712232 |
| C           | -3.288141431914         | -0.102951355812 | 0.572550972061  |
| C           | -4.076224600852         | 1.075720410268  | 0.487598036719  |
| H           | -4.205023347049         | 3.113746971152  | -0.245315403618 |
| H           | -1.945356016861         | 3.077246593959  | -1.307750317636 |
| H           | -3.669293515652         | -0.973067528460 | 1.100036935800  |
| C           | -1.019758838106         | -1.250153246153 | -0.110662184521 |
| C           | -1.392300065695         | -2.237158424773 | -1.255205998211 |
| C           | 0.309899457722          | -0.475419523992 | -0.400065431881 |
| C           | -0.185040250154         | -3.109278468599 | -1.650186289820 |
| H           | -2.238840061403         | -2.859499404244 | -0.935882290323 |
| C           | 1.004446989347          | -2.219145447583 | -2.048009775699 |
| H           | 0.110482733433          | -3.750299461894 | -0.807557807723 |
| H           | 0.742823738269          | -1.651946975858 | -2.965732359551 |
| C           | -0.150104728050         | 0.763584227420  | -1.261101842656 |
| H           | -0.199085065574         | 0.509195337849  | -2.330427685083 |



|   |                 |                 |                 |
|---|-----------------|-----------------|-----------------|
| H | 0.518664414569  | 1.625605354060  | -1.160484128362 |
| H | 1.873650915640  | -2.842246414784 | -2.294463242150 |
| H | -0.451158290877 | -3.764476003745 | -2.490737447237 |
| H | -1.729985602013 | -1.670787005074 | -2.136008886985 |
| N | 1.387213604484  | -1.330495948850 | -0.928182803165 |
| C | -5.377028986026 | 1.114026666571  | 1.100378073730  |
| N | -6.447886503166 | 1.143230961725  | 1.604927377312  |
| C | 2.670127257200  | -0.624592209773 | -1.148952769747 |
| H | 2.572621780234  | 0.201038862088  | -1.879665456752 |
| H | 3.358371894866  | -1.354756458286 | -1.598637780941 |
| C | 3.299248235057  | -0.081969399508 | 0.130853963323  |
| C | 3.386601081689  | -0.885661296674 | 1.290438561803  |
| C | 3.853344096880  | 1.215488512198  | 0.161846164146  |
| C | 4.016649003698  | -0.403643917390 | 2.452427945279  |
| H | 2.950818109687  | -1.881617204253 | 1.274465493477  |
| C | 4.488234602057  | 1.702280098146  | 1.323253519749  |
| H | 3.789296220340  | 1.848035276185  | -0.721890719614 |
| C | 4.572351338129  | 0.893436353979  | 2.473217401240  |
| H | 4.076911880304  | -1.033452818998 | 3.337213323490  |
| H | 4.909702143807  | 2.704846268326  | 1.330459151087  |
| H | 5.059861721217  | 1.266195559584  | 3.370926461478  |
| H | -0.938126187910 | -1.815997153638 | 0.825605066685  |
| H | 0.664073727297  | -0.070891233268 | 0.557800112522  |

J

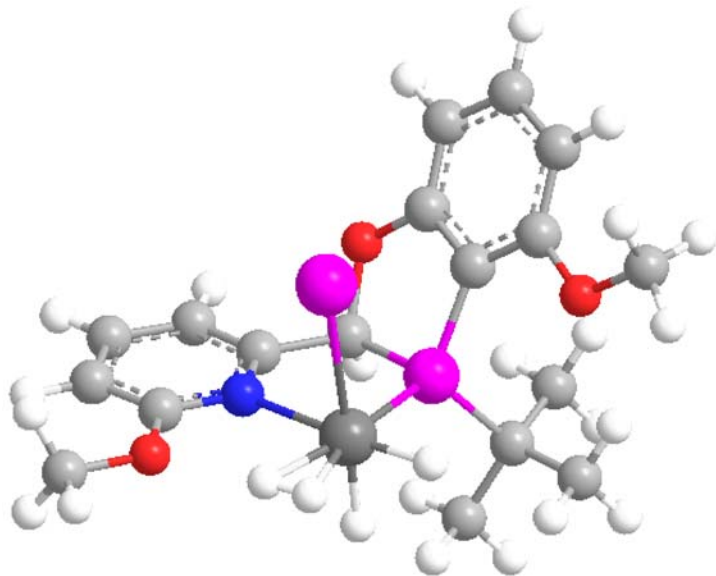

SCF Done: E(RB3LYP) = -1104.48278058 A.U.

Temperature 298.150 Kelvin. Pressure 1.00000 Atm.

|                                              |                             |
|----------------------------------------------|-----------------------------|
| Zero-point correction=                       | 0.406320 (Hartree/Particle) |
| Thermal correction to Energy=                | 0.434508                    |
| Thermal correction to Enthalpy=              | 0.435452                    |
| Thermal correction to Gibbs Free Energy=     | 0.345711                    |
| Sum of electronic and zero-point Energies=   | -1104.076461                |
| Sum of electronic and thermal Energies=      | -1104.048273                |
| Sum of electronic and thermal Enthalpies=    | -1104.047328                |
| Sum of electronic and thermal Free Energies= | -1104.137070                |

Temperature 323.150 Kelvin. Pressure 1.00000 Atm.

Zero-point correction= 0.406320 (Hartree/Particle)  
Thermal correction to Energy= 0.438879  
Thermal correction to Enthalpy= 0.439902  
Thermal correction to Gibbs Free Energy= 0.338006

| Atomic Type | Coordinates (Angstroms) |                 |                 |
|-------------|-------------------------|-----------------|-----------------|
|             | X                       | Y               | Z               |
| C           | 3.960099544396          | -1.372795389568 | 1.366443938687  |
| C           | 3.204116183566          | -0.696142969907 | 0.384874580152  |
| C           | 2.185127534306          | 0.192564256616  | 0.778053924929  |
| C           | 1.929714903089          | 0.381605130402  | 2.145302602188  |
| C           | 2.663666772868          | -0.272773276580 | 3.146180760983  |
| C           | 3.679861049293          | -1.150979220486 | 2.730691211412  |
| H           | 4.749924640762          | -2.060264739113 | 1.086832693822  |
| H           | 2.441648324622          | -0.105079958340 | 4.194239381209  |
| H           | 4.265484685932          | -1.676917172138 | 3.479998645238  |
| O           | 3.392921867982          | -0.833302671254 | -0.984811012055 |
| C           | 4.390131535430          | -1.791501447014 | -1.474606061699 |
| H           | 4.151135198288          | -2.806588883645 | -1.136925523299 |
| H           | 4.327435802149          | -1.736863307987 | -2.562263876607 |
| H           | 5.396608003983          | -1.509566603446 | -1.142855352374 |
| O           | 0.894686272424          | 1.265249980661  | 2.494850483768  |
| C           | 0.184231302206          | 1.843505788517  | 1.322691760941  |
| P           | 1.008184538440          | 1.160155734285  | -0.271055371463 |
| C           | 1.968458015423          | 2.652388181532  | -1.071190080427 |
| C           | 2.640512456659          | 2.148342374998  | -2.372182352934 |
| H           | 3.173183615702          | 2.987586792433  | -2.839492357943 |
| H           | 3.359667186241          | 1.347741176738  | -2.170846403202 |
| H           | 1.897652394504          | 1.773895722467  | -3.085774913318 |
| C           | 3.034321815800          | 3.170458902614  | -0.076992340171 |
| H           | 3.555675694304          | 4.020774974880  | -0.536228286190 |
| H           | 2.594529530806          | 3.524351169488  | 0.864214215371  |
| H           | 3.779837319489          | 2.402995779024  | 0.157097010725  |
| C           | 0.947822492747          | 3.768874787115  | -1.402576387560 |
| H           | 0.169988277427          | 3.415692896558  | -2.088210144006 |
| H           | 0.462371009693          | 4.177012329910  | -0.507053844053 |
| H           | 1.483198839699          | 4.593854718233  | -1.890696002202 |
| C           | -1.294787619765         | 1.516593380455  | 1.424604259374  |
| C           | -1.982989553579         | 1.934495626344  | 2.573053460424  |
| C           | -3.353688807785         | 1.652371877817  | 2.693165439668  |
| H           | -1.448604830126         | 2.464794592627  | 3.352293852842  |
| C           | -3.255804580710         | 0.589905217102  | 0.525825159005  |
| C           | -4.004493735159         | 0.975034763426  | 1.656427457103  |
| H           | -3.907148037861         | 1.960512503012  | 3.574365187828  |
| N           | -1.919480620477         | 0.838989661534  | 0.406217463777  |
| Ir          | -0.774623717011         | 0.137005187293  | -1.376946558976 |
| O           | -3.808240770499         | -0.063621517984 | -0.548429389393 |
| C           | -5.230097313229         | -0.443940538554 | -0.527931010342 |
| H           | -5.865949717802         | 0.446433602841  | -0.475743507410 |
| H           | -5.434721394506         | -1.117383330103 | 0.311145940367  |
| H           | -5.390140909080         | -0.963542115482 | -1.472661079594 |
| H           | -1.000041888949         | 1.513026786814  | -2.144575925110 |
| I           | -0.499131451161         | -2.510298258535 | -0.172083574505 |
| H           | 0.179696896725          | -0.288918348613 | -2.584819504609 |
| H           | -5.062061859659         | 0.754461652328  | 1.720810139833  |
| H           | 0.326011095478          | 2.925901053613  | 1.394787405606  |

H -2.377317125965 -0.417732586043 -1.938693929179  
H -1.841836787110 -0.612114596881 -2.564479796633

K

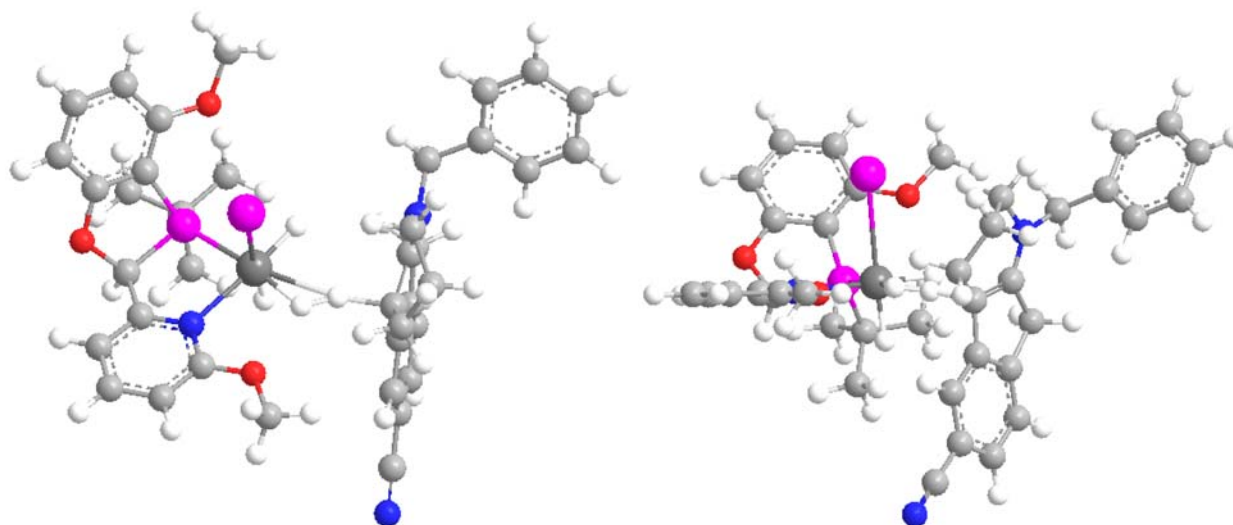

SCF Done: E(RB3LYP) = -1986.78877245 A.U.

Temperature 298.150 Kelvin. Pressure 1.00000 Atm.  
Zero-point correction= 0.737718 (Hartree/Particle)  
Thermal correction to Energy= 0.785228  
Thermal correction to Enthalpy= 0.786172  
Thermal correction to Gibbs Free Energy= 0.648239  
Sum of electronic and zero-point Energies= -1986.051054  
Sum of electronic and thermal Energies= -1986.003544  
Sum of electronic and thermal Enthalpies= -1986.002600  
Sum of electronic and thermal Free Energies= -1986.140533

Temperature 323.150 Kelvin. Pressure 1.00000 Atm.  
Zero-point correction= 0.737718 (Hartree/Particle)  
Thermal correction to Energy= 0.792657  
Thermal correction to Enthalpy= 0.793681  
Thermal correction to Gibbs Free Energy= 0.636371

| Atomic Type | Coordinates (Angstroms) |                 |                 |
|-------------|-------------------------|-----------------|-----------------|
|             | X                       | Y               | Z               |
| C           | -2.041936309200         | -5.503981883454 | -1.201073520464 |
| C           | -2.122761697111         | -4.987180514386 | 0.109265869250  |
| C           | -2.422716916229         | -3.634905690900 | 0.288197256152  |
| C           | -2.640767941979         | -2.774460918517 | -0.823386288837 |
| C           | -2.550886582372         | -3.272032169078 | -2.129035681827 |
| C           | -2.255998206249         | -4.650210303379 | -2.310304558014 |
| H           | -1.817962769421         | -6.553604386342 | -1.364922508571 |
| H           | -1.958914439980         | -5.642063235902 | 0.960614515085  |
| H           | -2.704036541020         | -2.630886378930 | -2.992034880779 |
| C           | -2.867529790626         | -1.387862314623 | -0.343677366955 |
| C           | -3.592961848982         | -0.286839480078 | -1.121307629409 |
| C           | -3.008762873111         | -1.477682763529 | 1.075925054004  |
| C           | -4.516213571666         | 0.517254373767  | -0.172453636027 |
| H           | -2.870455870675         | 0.393069928087  | -1.592936241989 |
| C           | -3.829071886250         | 0.810311535673  | 1.175984897907  |

|   |                 |                 |                 |
|---|-----------------|-----------------|-----------------|
| H | -5.440085912850 | -0.045634031475 | 0.015587989448  |
| H | -4.513655062361 | 1.331857347971  | 1.851424270264  |
| C | -2.580103489215 | -2.847398202278 | 1.578950060495  |
| H | -3.315639678546 | -3.295647929601 | 2.258116927323  |
| H | -1.629120434804 | -2.780024233021 | 2.127179292214  |
| H | -2.937366570552 | 1.437241994616  | 1.032159550170  |
| H | -4.796474001348 | 1.470569774580  | -0.635199201242 |
| H | -4.190877009498 | -0.728684434479 | -1.929044553693 |
| N | -3.413688076218 | -0.457573590400 | 1.843425251469  |
| C | -2.170026227621 | -5.189293819808 | -3.641967374327 |
| N | -2.100116134274 | -5.631171888230 | -4.738173982870 |
| C | -3.388491651883 | -0.473666940716 | 3.324325746948  |
| H | -2.762551100849 | 0.361105639307  | 3.663432855737  |
| H | -2.894317897132 | -1.393721322310 | 3.650154806174  |
| C | -4.773828292961 | -0.366268935143 | 3.958361221682  |
| C | -5.847669984552 | -1.163274149346 | 3.503442907212  |
| C | -4.982648613618 | 0.510292106619  | 5.043507780944  |
| C | -7.106508371203 | -1.088463229783 | 4.127718493029  |
| H | -5.706145390148 | -1.836321956741 | 2.660841361093  |
| C | -6.241094756489 | 0.584407648636  | 5.673101742804  |
| H | -4.165558386140 | 1.136593645685  | 5.396183892574  |
| C | -7.306886804188 | -0.215511190285 | 5.217083563749  |
| H | -7.926097609782 | -1.706117006635 | 3.768788208691  |
| H | -6.389339258531 | 1.264580890563  | 6.508097873485  |
| H | -8.279376396873 | -0.157655897556 | 5.699495396120  |
| H | -1.480346079898 | -0.894291535753 | -0.382646388945 |
| C | 4.093143566004  | 2.374249117045  | 3.783834092304  |
| C | 3.392701260024  | 1.268210110565  | 3.253272635743  |
| C | 3.688681043498  | 0.805260519508  | 1.956565442646  |
| C | 4.689224550785  | 1.455499005159  | 1.216103071284  |
| C | 5.409645450764  | 2.552265636238  | 1.714257073008  |
| C | 5.090699079918  | 2.999956469840  | 3.007989319692  |
| H | 3.876338855110  | 2.748260973387  | 4.777872080388  |
| H | 6.175073993509  | 3.030343874573  | 1.112774917966  |
| H | 5.624631776928  | 3.850743759345  | 3.423169249011  |
| O | 2.408000906404  | 0.566512149166  | 3.942683605473  |
| C | 1.985832625385  | 1.046226099089  | 5.261672934472  |
| H | 1.600551470248  | 2.070708634157  | 5.197715577345  |
| H | 1.189139457640  | 0.367886352841  | 5.570744126410  |
| H | 2.814359571164  | 0.999082085478  | 5.978830861542  |
| O | 4.971184683051  | 0.955316229662  | -0.066594614760 |
| C | 4.023676780320  | -0.104238402814 | -0.502302847194 |
| P | 2.905072026362  | -0.575752809266 | 0.985267598201  |
| C | 3.658885004865  | -2.237238021035 | 1.679011704765  |
| C | 2.811910563901  | -2.662193508497 | 2.904546873573  |
| H | 3.221818473037  | -3.596580696129 | 3.312720053226  |
| H | 2.829585335570  | -1.901223399901 | 3.692085406446  |
| H | 1.767585761192  | -2.841092522354 | 2.622417142998  |
| C | 5.134710802710  | -2.028187857590 | 2.092292505333  |
| H | 5.541749782802  | -2.986357984737 | 2.443488570090  |
| H | 5.759185005805  | -1.691177822780 | 1.255056284210  |
| H | 5.229895003642  | -1.301218587746 | 2.906371700335  |
| C | 3.559633650231  | -3.318859771882 | 0.575253978790  |
| H | 2.529494419064  | -3.442725687813 | 0.224018982956  |
| H | 4.196073726512  | -3.094490406529 | -0.290376110532 |
| H | 3.899275491719  | -4.276762467671 | 0.991983385707  |
| C | 3.243192922727  | 0.386139036152  | -1.713218561086 |
| C | 3.979950518164  | 0.946958167904  | -2.768134709822 |
| C | 3.308307041833  | 1.379201961014  | -3.921661433853 |
| H | 5.054797788877  | 1.041696938582  | -2.672539975666 |
| C | 1.240450892790  | 0.635677548005  | -2.907578651918 |

|    |                 |                 |                 |
|----|-----------------|-----------------|-----------------|
| C  | 1.921622094728  | 1.215580602817  | -3.999648792213 |
| H  | 3.853294315596  | 1.823898012278  | -4.748410525506 |
| N  | 1.875640800502  | 0.245332433098  | -1.761246837488 |
| Ir | 0.748743826636  | -0.484084929817 | 0.047355196599  |
| O  | -0.115502255002 | 0.412609783908  | -2.922553406359 |
| C  | -0.901074824915 | 0.836575421308  | -4.090225206636 |
| H  | -0.574118793692 | 0.310173929272  | -4.994255186594 |
| H  | -0.832829504527 | 1.921253908848  | -4.231332724263 |
| H  | -1.926811119250 | 0.556958308055  | -3.849775089823 |
| H  | -0.711010369849 | -0.469606824506 | -0.810094184067 |
| H  | 0.914187085822  | -2.009904906007 | -0.370765810491 |
| I  | 0.144792469050  | 2.318799950508  | 0.760369612475  |
| H  | 0.033670325277  | -1.014150762474 | 1.376861818955  |
| H  | 1.382914449120  | 1.526470345601  | -4.884979890925 |
| H  | 4.647560684347  | -0.953381946674 | -0.796798472818 |

---

Reference:

- Colombe, J. R.; Bernhardt, S.; Stathakis, C.; Buchwald, S. L.; Knochel, P; *Org. Lett.* **2013**, *15*, 5754–5757.
- Gaussian 09, Revision C.01, Frisch, M. J.; Trucks, G. W.; Schlegel, H. B.; Scuseria, G. E.; Robb, M. A.; Cheeseman, J. R.; Scalmani, G.; Barone, V.; Mennucci, B.; Petersson, G. A.; Nakatsuji, H.; Caricato, M.; Li, X.; Hratchian, H. P.; Izmaylov, A. F.; Bloino, J.; Zheng, G.; Sonnenberg, J. L.; Hada, M.; Ehara, M.; Toyota, K.; Fukuda, R.; Hasegawa, J.; Ishida, M.; Nakajima, T.; Honda, Y.; Kitao, O.; Nakai, H.; Vreven, T.; Montgomery, J. A., Jr.; Peralta, J. E.; Ogliaro, F.; Bearpark, M.; Heyd, J. J.; Brothers, E.; Kudin, K. N.; Staroverov, V. N.; Kobayashi, R.; Normand, J.; Raghavachari, K.; Rendell, A.; Burant, J. C.; Iyengar, S. S.; Tomasi, J.; Cossi, M.; Rega, N.; Millam, J. M.; Klene, M.; Knox, J. E.; Cross, J. B.; Bakken, V.; Adamo, C.; Jaramillo, J.; Gomperts, R.; Stratmann, R. E.; Yazyev, O.; Austin, A. J.; Cammi, R.; Pomelli, C.; Ochterski, J. W.; Martin, R. L.; Morokuma, K.; Zakrzewski, V. G.; Voth, G. A.; Salvador, P.; Dannenberg, J. J.; Dapprich, S.; Daniels, A. D.; Farkas, Ö.; Foresman, J. B.; Ortiz, J. V.; Cioslowski, J.; Fox, D. J. Gaussian, Inc., Wallingford CT, 2010.
- a) Lee, C.; Yang, W.; Parr, R. G. *Phys. Rev. B* **1988**, *37*, 785–789. b) Becke, A. D. *J. Chem. Phys.* **1993**, *98*, 5648–5652. c) Becke, A. D. *J. Chem. Phys.* **1993**, *98*, 1372–1377.
- a) Hay, P. J.; Wadt, W. R. *J. Chem. Phys.* **1985**, *82*, 270–283. b) Wadt, W. R.; Hay, P. J. *J. Chem. Phys.* **1985**, *82*, 284–298. c) Hay, P. J.; Wadt, W. R. *J. Chem. Phys.* **1985**, *82*, 299–310.
- Marenich, A. V.; Cramer, C. J.; Truhlar, D. G. *J. Phys. Chem. B* **2009**, *113*, 6378–6396.
- Zhao, Y.; Truhlar, D. *Theor. Chem. Acc.* **2008**, *120*, 215–241.
- Desrosiers, J.-N.; Wei, X.; Gutierrez, O.; Savoie, J.; Qu, B.; Zeng, X.; Lee, H.; Grinberg, N.; Haddad, N.; Yee, N. K.; Roschangar, F.; Song, J. J.; Kozlowski, M. C.; Senanayake, C. H. *Chem. Sci.* **2016**, *7*, 5581–5586.
- Lin, B.-L.; Liu, L.; Fu, Y.; Luo, S.-W.; Chen, Q.; Guo, Q.-X. *Organometallics* **2004**, *23*, 2114–2123.
- Dunning, T. H. Jr.; Hay, P. J. in *Modern Theoretical Chemistry*, Ed. H. F. Schaefer III, Vol. 3 (Plenum, New York, 1977), 1–28.
- a) Martín, M.; Sola, E.; Tejero, S.; Andrés, J. L.; Oro, L. A. *Chem. Eur. J.* **2006**, *12*, 4043–4056. b) Martín, M.; Sola, E.; Tejero, S.; Andrés, J. L.; Oro, L. A. *Chem. Eur. J.* **2006**, *12*, 4057–4068.
- Hopmann K. H.; Bayer, A. *Organometallics* **2011**, *30*, 2483–2497.
- Dobereiner, G. E.; Nova, A.; Schley, N. D.; Hazari, N.; Miller, S. J.; Eisenstein, O.; Crabtree, R. H. *J. Am. Chem. Soc.* **2011**, *133*, 7547–7562.
